# Supplementary material for: New Structural Complexity Metrics for Forests from Single Terrestrial Lidar Scans
Source: MDPI journal article supplement (doi:10.3390/rs15010145), 2022-12-27

**Supplementary Material:**

MEASURING STRUCTURAL COMPLEXITY IN FORESTS USING GROUND-BASED  
LIDAR

IN \_\_\_\_\_

## Supplement A—Lidar plot scan images

Laser return intensity images for all 243 lidar scans (plots) used for this study. Included at the top of all pages is the name of the site, ecoregion, and ecological systems description. Each scan has information pertinent to the plot listed below. Scan # is the order at each forest stand the plot was scanned. Plot # is the position of the scan in the 3X3 grid laid out as follows with 1 being the northwest corner:

|   |   |   |
|---|---|---|
| 1 | 2 | 3 |
| 4 | 5 | 6 |
| 7 | 8 | 9 |

The date, time, location, slope aspect (true north), slope degree, and location of tree tag (TT) relative from the monumented location of scan are noted along with the lidar derived diameter diversity index (LIDDI), basal area (BA) ( $\text{m}^2/\text{ha}$ ), and variance in dbh (DBH V) (cm) derived from the isovist polygons for each site.

| Name         | EcoRegion         | Ecological Systems Description                                               |
|--------------|-------------------|------------------------------------------------------------------------------|
| Ashland (AL) | Klamath Mountains | Mediterranean California Lower Montane Black Oak-Conifer Forest and Woodland |

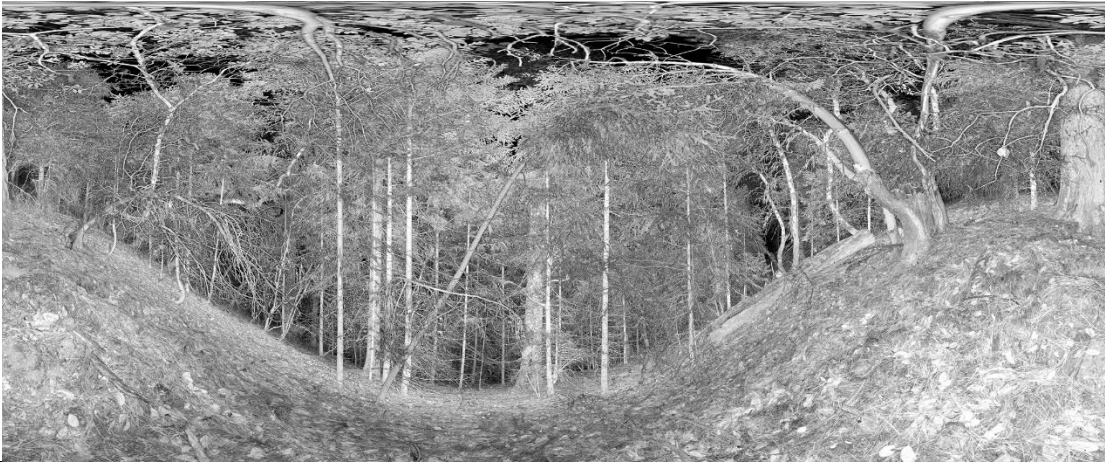

| Scan #/ Plot # / Date / Time  | UTM (NAD 83)        | Aspect / Degree / TT | LiDDI / BA (m <sup>2</sup> /ha) / DBH V (cm) |
|-------------------------------|---------------------|----------------------|----------------------------------------------|
| 000 / AL7 / 09-26-2014 / 1315 | 10T 0524407 4665478 | 95° / 35° / 5m 290°  | 5.6 / 35 / 441                               |

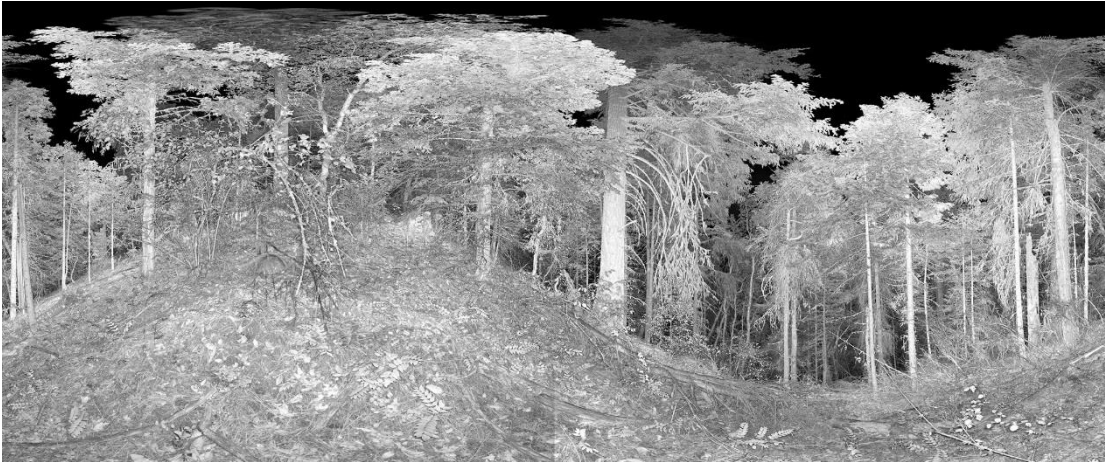

| Scan #/ Plot # / Date / Time  | UTM (NAD 83)        | Aspect / Degree / TT | LiDDI / BA (m <sup>2</sup> /ha) / DBH V (cm) |
|-------------------------------|---------------------|----------------------|----------------------------------------------|
| 001 / AL4 / 09-26-2014 / 1345 | 10T 0524380 4665567 | 55° / 35° / 5m 285°  | 4.3 / 37 / 268                               |

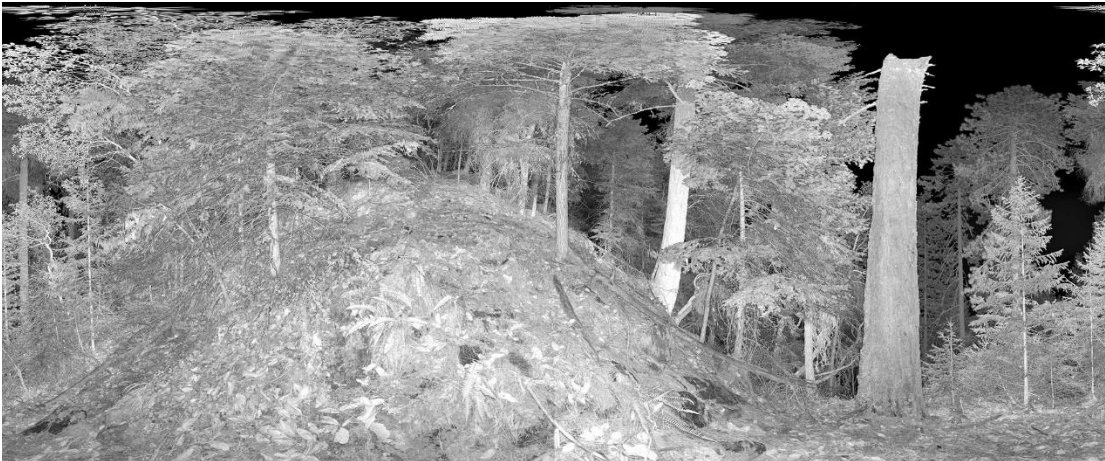

| Scan #/ Plot # / Date / Time  | UTM (NAD 83)        | Aspect / Degree / TT | LiDDI / BA (m <sup>2</sup> /ha) / DBH V (cm) |
|-------------------------------|---------------------|----------------------|----------------------------------------------|
| 002 / AL5 / 09-26-2014 / 1430 | 10T 0524483 4665603 | 55° / 43° / 2m 340°  | 4.9 / 27 / 457                               |

| Name         | EcoRegion         | Ecological Systems Description                                               |
|--------------|-------------------|------------------------------------------------------------------------------|
| Ashland (AL) | Klamath Mountains | Mediterranean California Lower Montane Black Oak-Conifer Forest and Woodland |

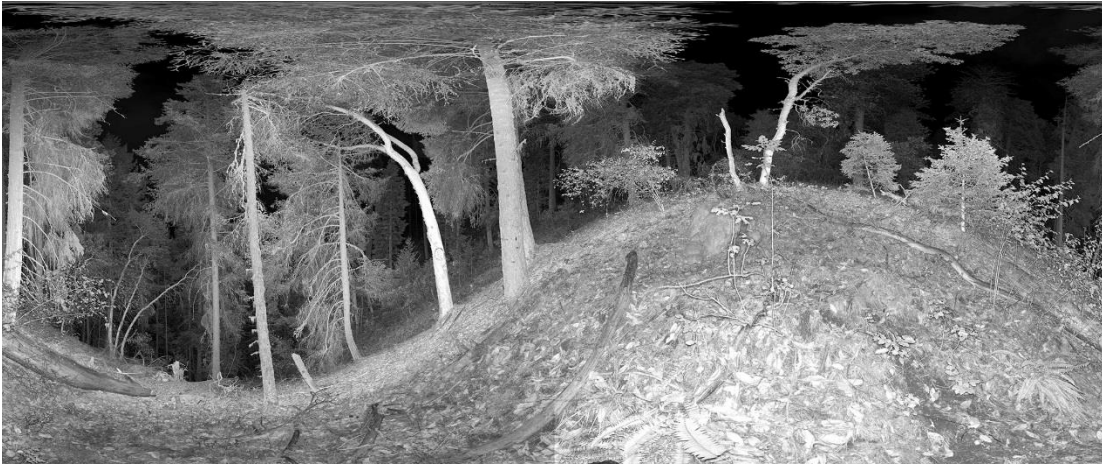

| Scan #/ Plot # / Date / Time  | UTM (NAD 83)        | Aspect / Degree / TT | LiDDI / BA (m <sup>2</sup> /ha) / DBH V (cm) |
|-------------------------------|---------------------|----------------------|----------------------------------------------|
| 003 / AL8 / 09-26-2014 / 1510 | 10T 0524500 4665497 | 90° / 34° / 4m 190°  | 3.0 / 26 / 463                               |

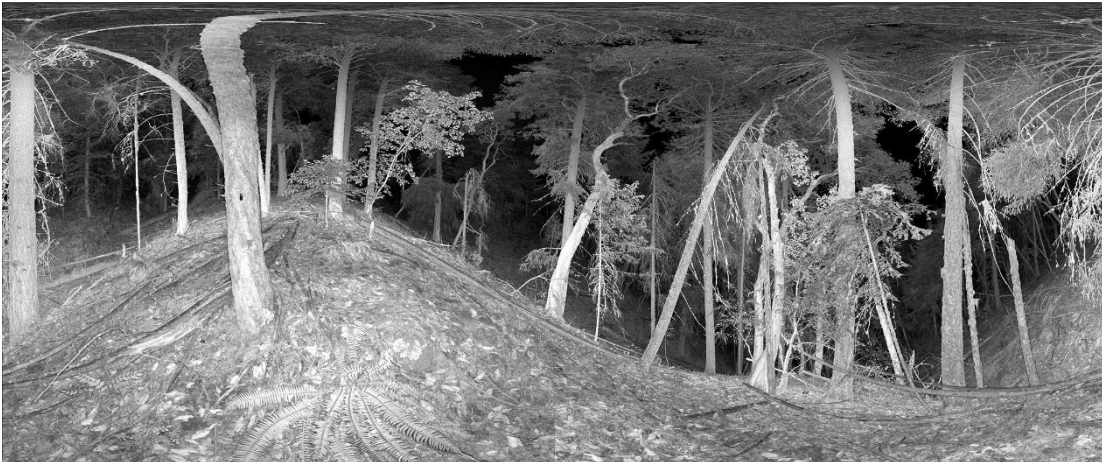

| Scan #/ Plot # / Date / Time  | UTM (NAD 83)        | Aspect / Degree / TT | LiDDI / BA (m <sup>2</sup> /ha) / DBH V (cm) |
|-------------------------------|---------------------|----------------------|----------------------------------------------|
| 004 / AL9 / 09-26-2014 / 1545 | 10T 0524595 4665525 | 45° / 34° / 2m 215°  | 3.0 / 40 / 324                               |

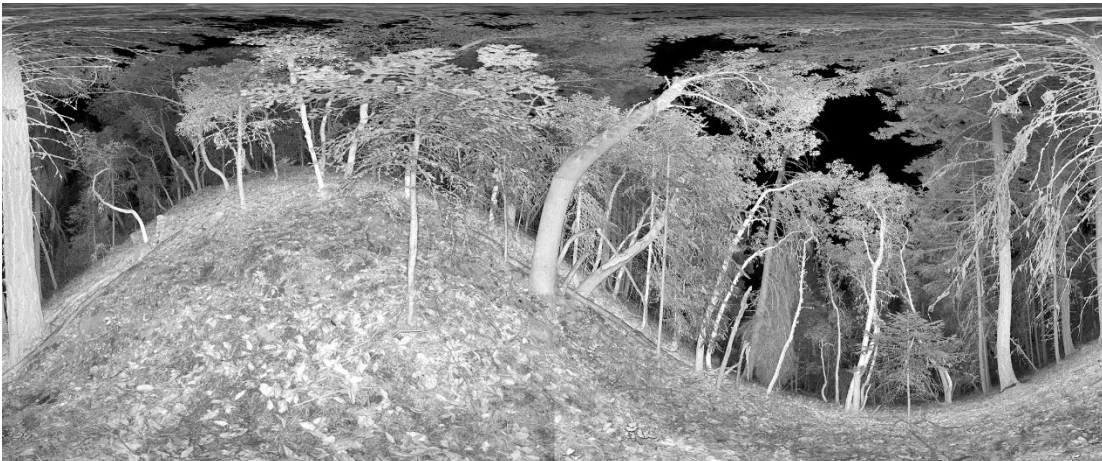

| Scan #/ Plot # / Date / Time  | UTM (NAD 83)        | Aspect / Degree / TT | LiDDI / BA (m <sup>2</sup> /ha) / DBH V (cm) |
|-------------------------------|---------------------|----------------------|----------------------------------------------|
| 005 / AL6 / 09-26-2014 / 1640 | 10T 0524576 4665625 | 70° / 36° / 4m 180°  | 3.0 / 52 / 346                               |

| Name         | EcoRegion         | Ecological Systems Description                                               |
|--------------|-------------------|------------------------------------------------------------------------------|
| Ashland (AL) | Klamath Mountains | Mediterranean California Lower Montane Black Oak-Conifer Forest and Woodland |

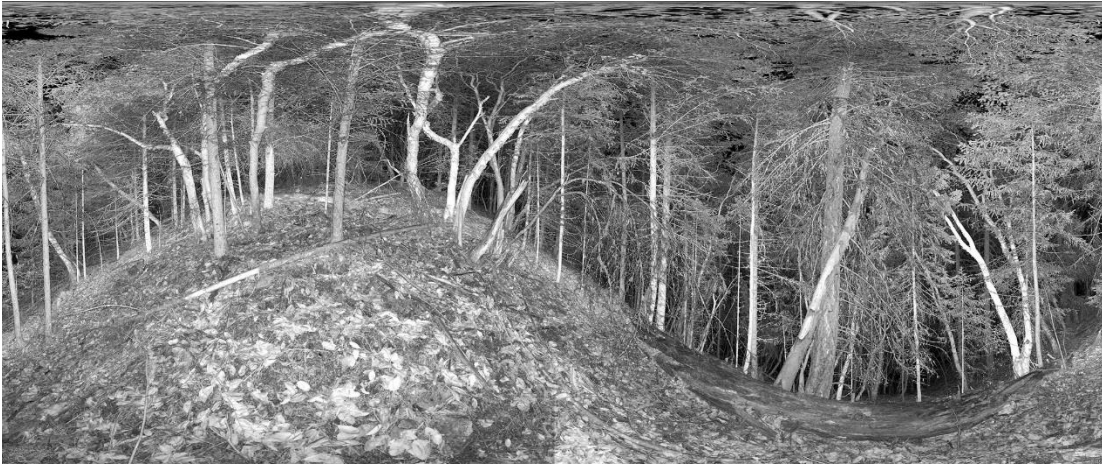

| Scan #/ Plot # / Date / Time  | UTM (NAD 83)        | Aspect / Degree / TT | LiDDI / BA (m <sup>2</sup> /ha) / DBH V (cm) |
|-------------------------------|---------------------|----------------------|----------------------------------------------|
| 006 / AL3 / 09-26-2014 / 1715 | 10T 0524546 4665720 | 70° / 37° / 3m 70°   | 3.0 / 28 / 96                                |

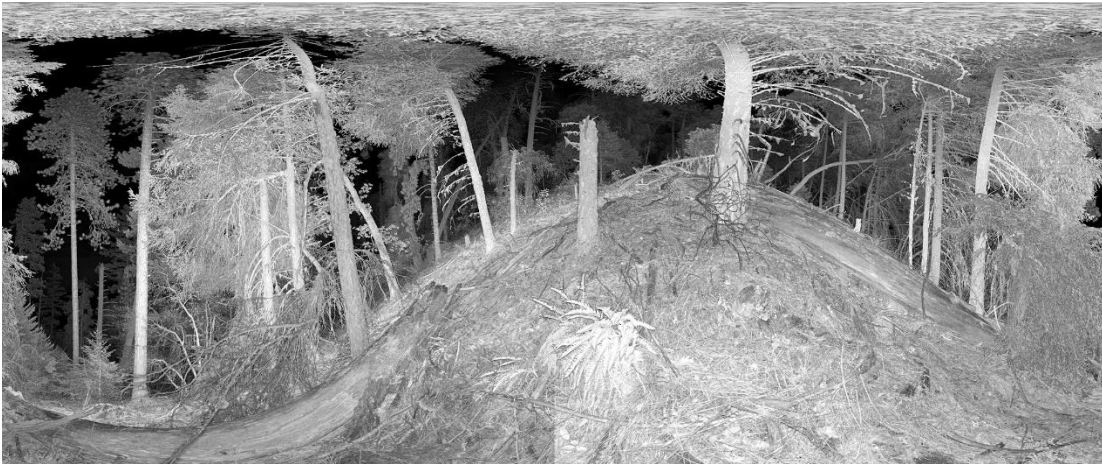

| Scan #/ Plot # / Date / Time  | UTM (NAD 83)        | Aspect / Degree / TT | LiDDI / BA (m <sup>2</sup> /ha) / DBH V (cm) |
|-------------------------------|---------------------|----------------------|----------------------------------------------|
| 007 / AL2 / 09-26-2014 / 1755 | 10T 0524460 4665690 | 85° / 38° / 4m 280°  | 3.0 / 48 / 161                               |

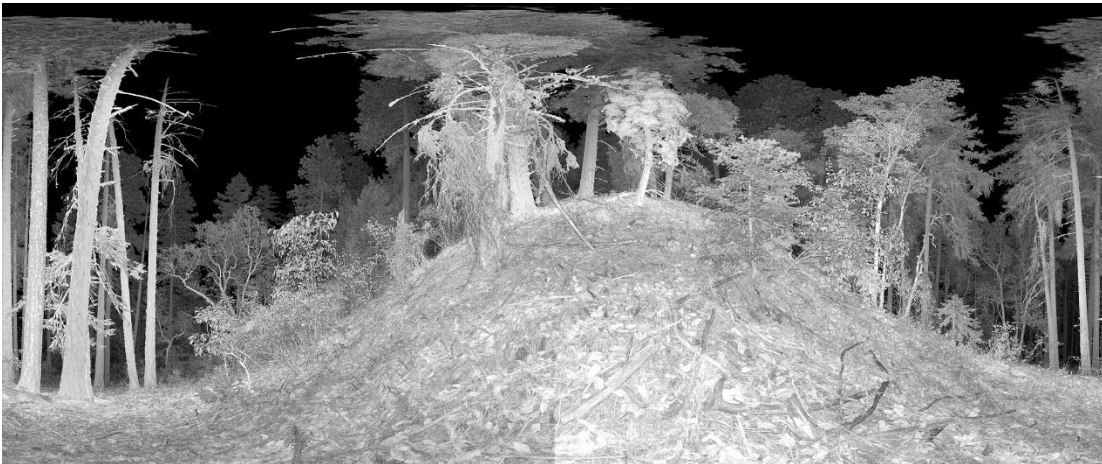

| Scan #/ Plot # / Date / Time  | UTM (NAD 83)        | Aspect / Degree / TT | LiDDI / BA (m <sup>2</sup> /ha) / DBH V (cm) |
|-------------------------------|---------------------|----------------------|----------------------------------------------|
| 008 / AL1 / 09-26-2014 / 1845 | 10T 0524358 4665670 | 60° / 35° / 6m 25°   | 4.4 / 69 / 312                               |

| Name         | EcoRegion     | Ecological Systems Description                              |
|--------------|---------------|-------------------------------------------------------------|
| Bluejay (BJ) | East Cascades | Northern Rocky Mountain Ponderosa Pine Woodland and Savanna |

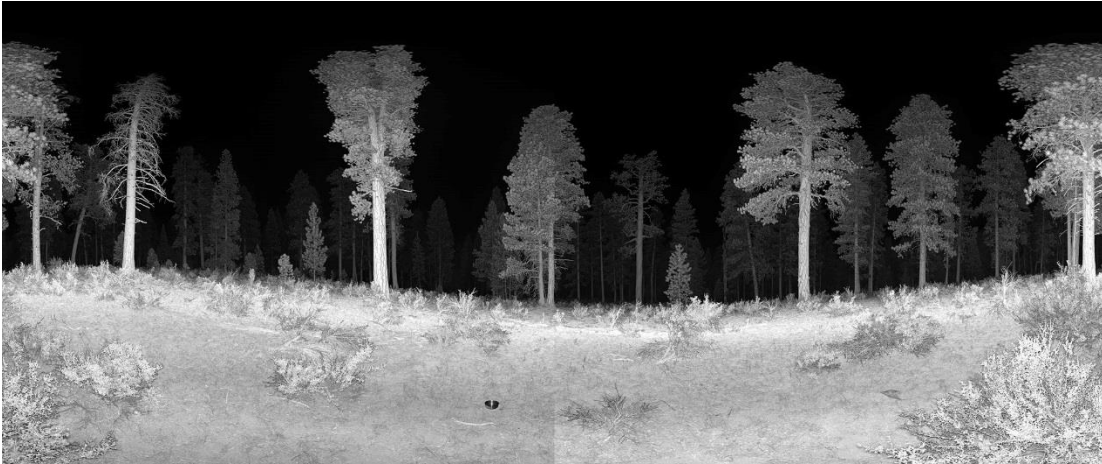

| Scan #/ Plot # / Date / Time  | UTM (NAD 83)        | Aspect / Degree / TT | LiDDI / BA (m <sup>2</sup> /ha) / DBH V (cm) |
|-------------------------------|---------------------|----------------------|----------------------------------------------|
| 000 / BJ7 / 09-09-2014 / 1220 | 10T 0618626 4753481 | 275° / 6° / 11m 210° | 5.0 / 33 / 831                               |

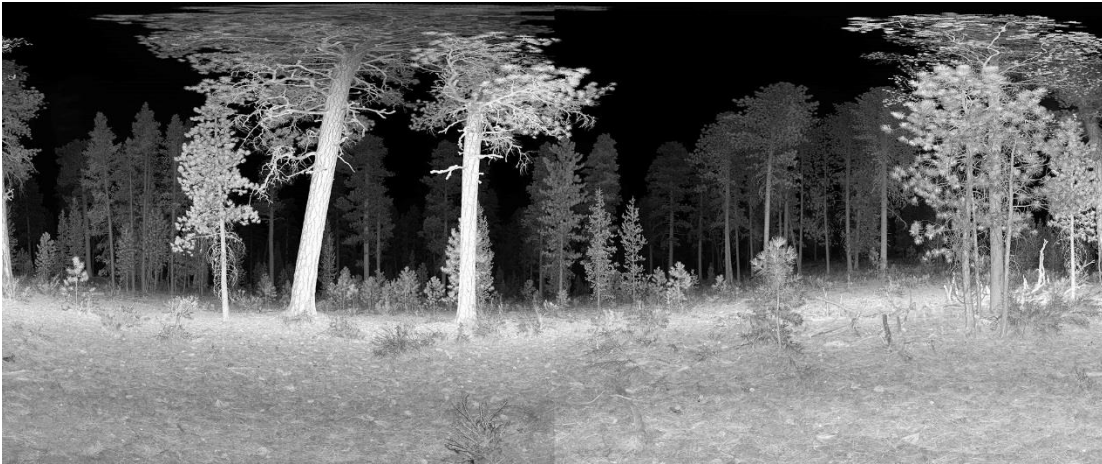

| Scan #/ Plot # / Date / Time  | UTM (NAD 83)        | Aspect / Degree / TT | LiDDI / BA (m <sup>2</sup> /ha) / DBH V (cm) |
|-------------------------------|---------------------|----------------------|----------------------------------------------|
| 001 / BJ4 / 09-09-2014 / 1325 | 10T 0618603 4753583 | 350° / 8° / 7m 352°  | 6.0 / 41 / 1050                              |

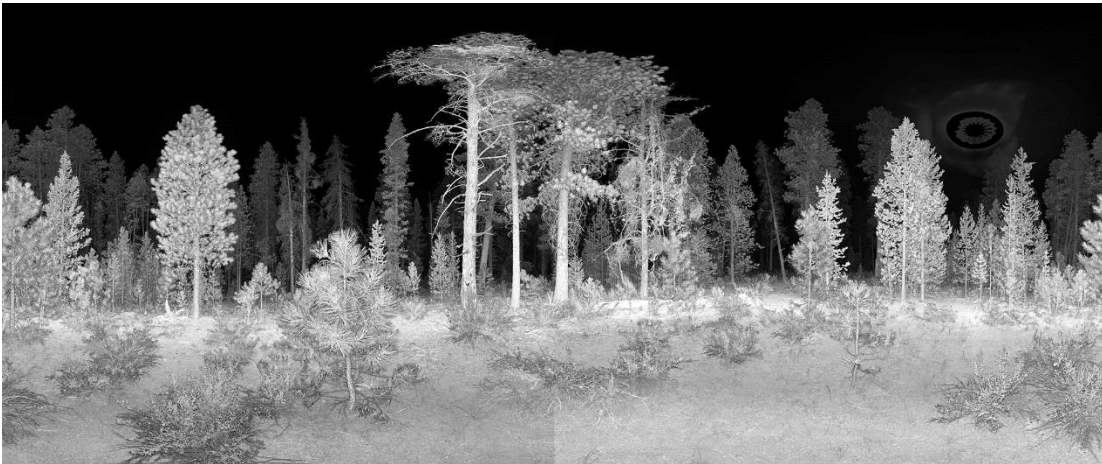

| Scan #/ Plot # / Date / Time  | UTM (NAD 83)        | Aspect / Degree / TT | LiDDI / BA (m <sup>2</sup> /ha) / DBH V (cm) |
|-------------------------------|---------------------|----------------------|----------------------------------------------|
| 002 / BJ1 / 09-09-2014 / 1410 | 10T 0618570 4753673 | 330° / 6° / 4m 340°  | 2.7 / 11 / 78                                |

| Name         | EcoRegion     | Ecological Systems Description                              |
|--------------|---------------|-------------------------------------------------------------|
| Bluejay (BJ) | East Cascades | Northern Rocky Mountain Ponderosa Pine Woodland and Savanna |

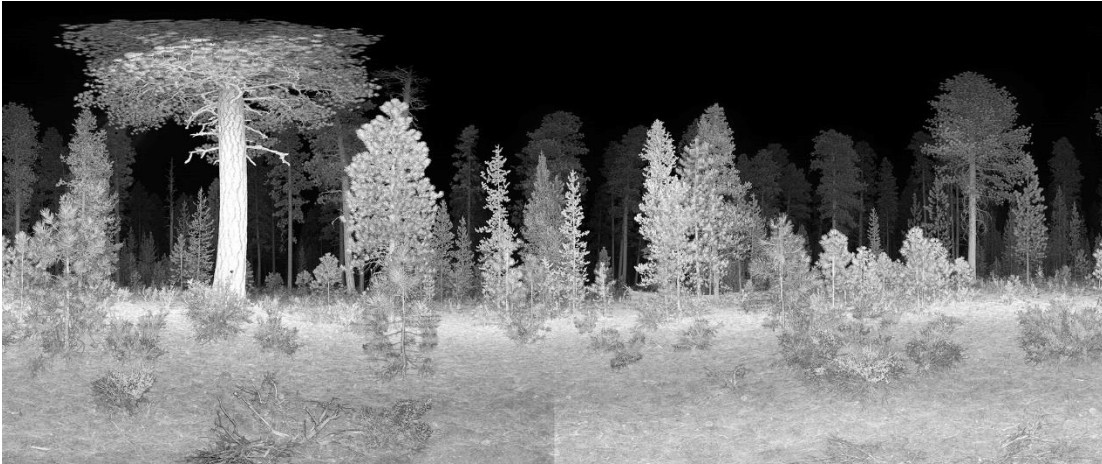

| Scan #/ Plot # / Date / Time  | UTM (NAD 83)        | Aspect / Degree / TT | LiDDI / BA (m <sup>2</sup> /ha) / DBH V (cm) |
|-------------------------------|---------------------|----------------------|----------------------------------------------|
| 003 / BJ2 / 09-09-2014 / 1445 | 10T 0618662 4753697 | - / - / 6m 270°      | 5.7 / 33 / 1596                              |

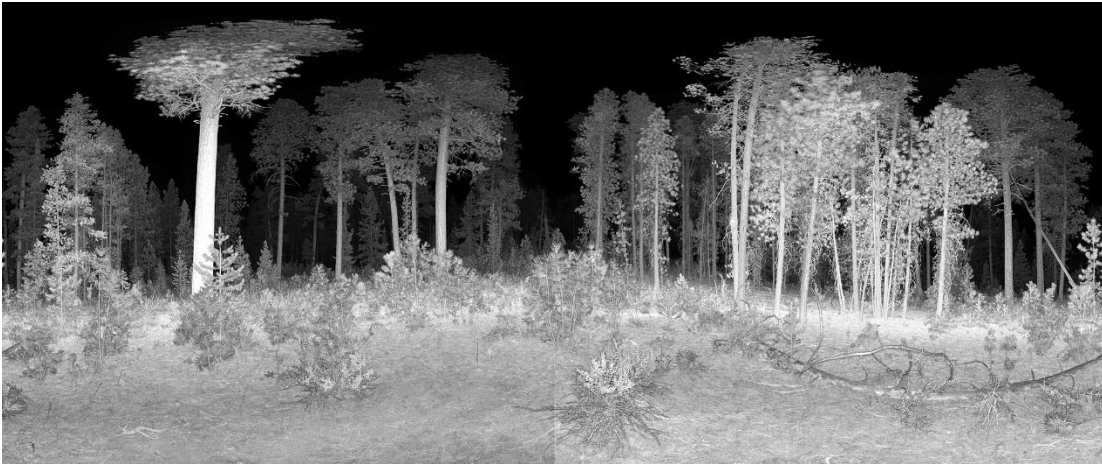

| Scan #/ Plot # / Date / Time  | UTM (NAD 83)        | Aspect / Degree / TT | LiDDI / BA (m <sup>2</sup> /ha) / DBH V (cm) |
|-------------------------------|---------------------|----------------------|----------------------------------------------|
| 004 / BJ3 / 09-09-2014 / 1515 | 10T 0618757 4753730 | 350° / 7° / 7m 25°   | 4.0 / 33 / 401                               |

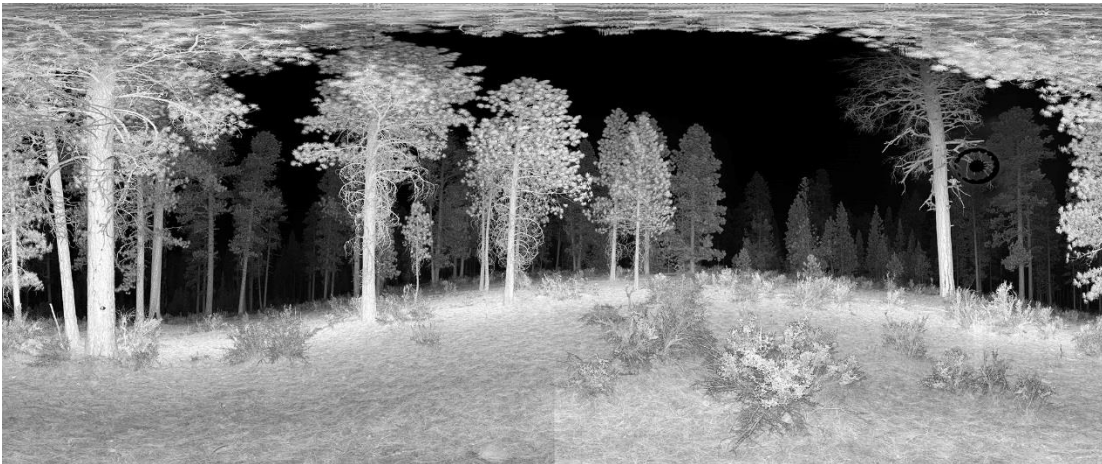

| Scan #/ Plot # / Date / Time  | UTM (NAD 83)        | Aspect / Degree / TT | LiDDI / BA (m <sup>2</sup> /ha) / DBH V (cm) |
|-------------------------------|---------------------|----------------------|----------------------------------------------|
| 005 / BJ5 / 09-09-2014 / 1545 | 10T 0618699 4753599 | 340° / 15° / 4m 300° | 6.0 / 36 / 798                               |

| Name         | EcoRegion     | Ecological Systems Description                              |
|--------------|---------------|-------------------------------------------------------------|
| Bluejay (BJ) | East Cascades | Northern Rocky Mountain Ponderosa Pine Woodland and Savanna |

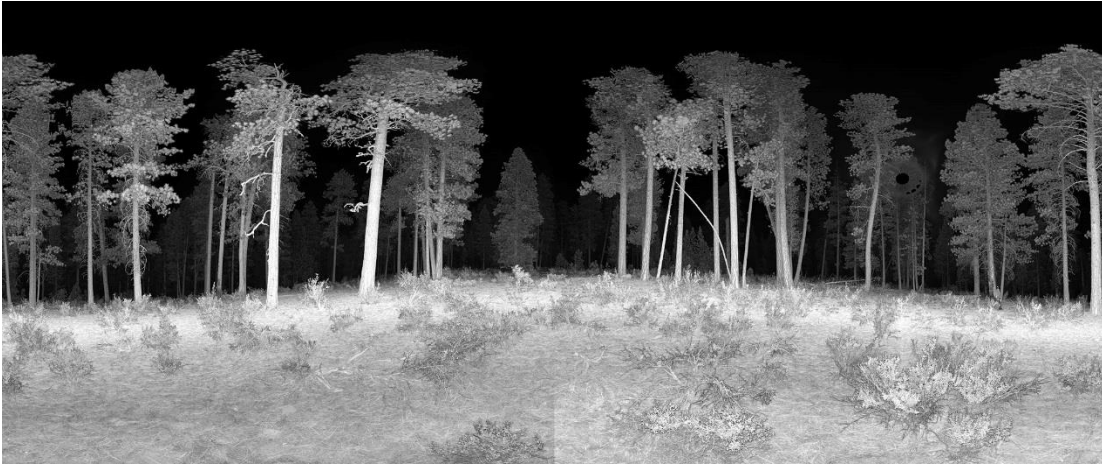

| Scan #/ Plot # / Date / Time  | UTM (NAD 83)        | Aspect / Degree / TT | LiDDI / BA (m <sup>2</sup> /ha) / DBH V (cm) |
|-------------------------------|---------------------|----------------------|----------------------------------------------|
| 006 / BJ6 / 09-09-2014 / 1610 | 10T 0618792 4753638 | 5° / 6° / 8m 38°     | 5.2 / 54 / 457                               |

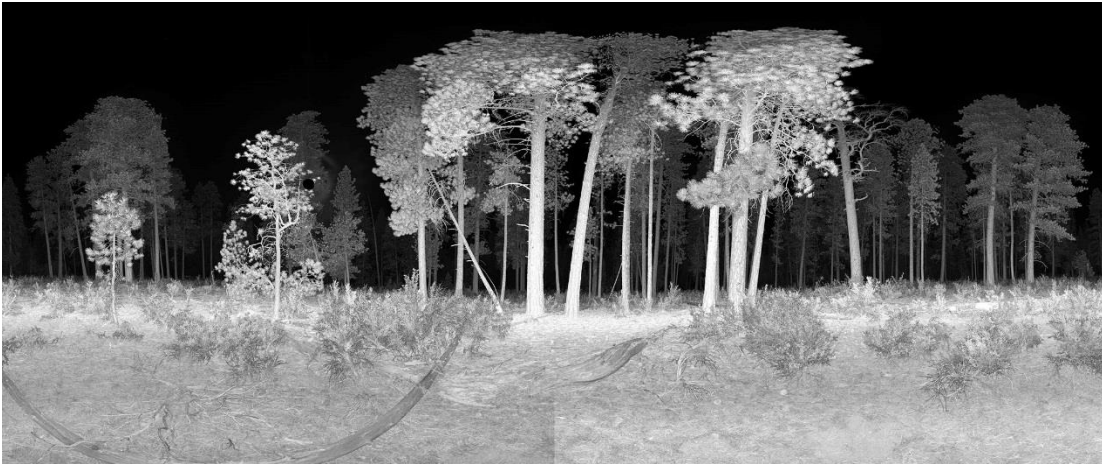

| Scan #/ Plot # / Date / Time  | UTM (NAD 83)        | Aspect / Degree / TT | LiDDI / BA (m <sup>2</sup> /ha) / DBH V (cm) |
|-------------------------------|---------------------|----------------------|----------------------------------------------|
| 007 / BJ9 / 09-09-2014 / 1640 | 10T 0618821 4753540 | 345° / 5° / 5m 25°   | 5.6 / 45 / 521                               |

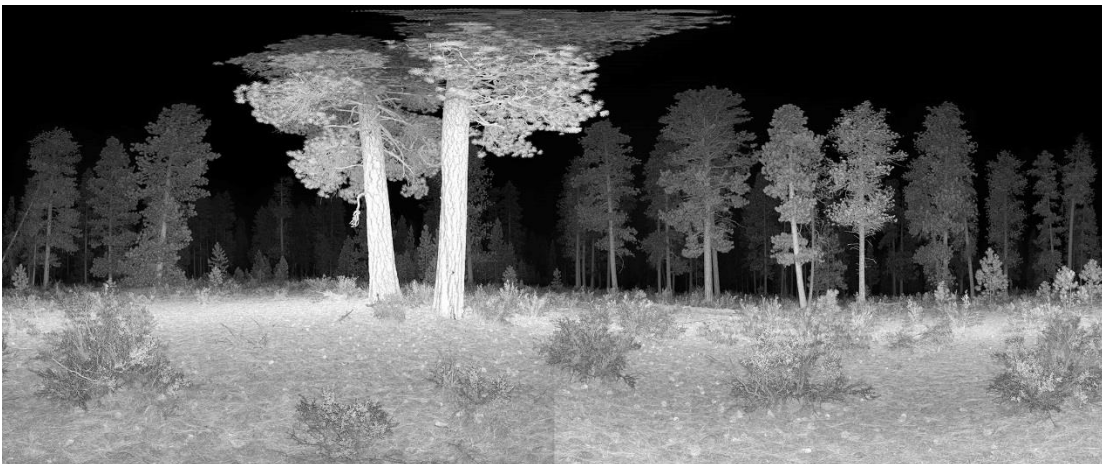

| Scan #/ Plot # / Date / Time  | UTM (NAD 83)        | Aspect / Degree / TT | LiDDI / BA (m <sup>2</sup> /ha) / DBH V (cm) |
|-------------------------------|---------------------|----------------------|----------------------------------------------|
| 008 / BJ8 / 09-09-2014 / 1705 | 10T 0618724 4753507 | - / - / 5m 180°      | 5.3 / 36 / 859                               |

| Name                 | EcoRegion     | Ecological Systems Description                                      |
|----------------------|---------------|---------------------------------------------------------------------|
| Carolyn's Crown (CA) | West Cascades | North Pacific Maritime Mesic-Wet Douglas-fir-Western Hemlock Forest |

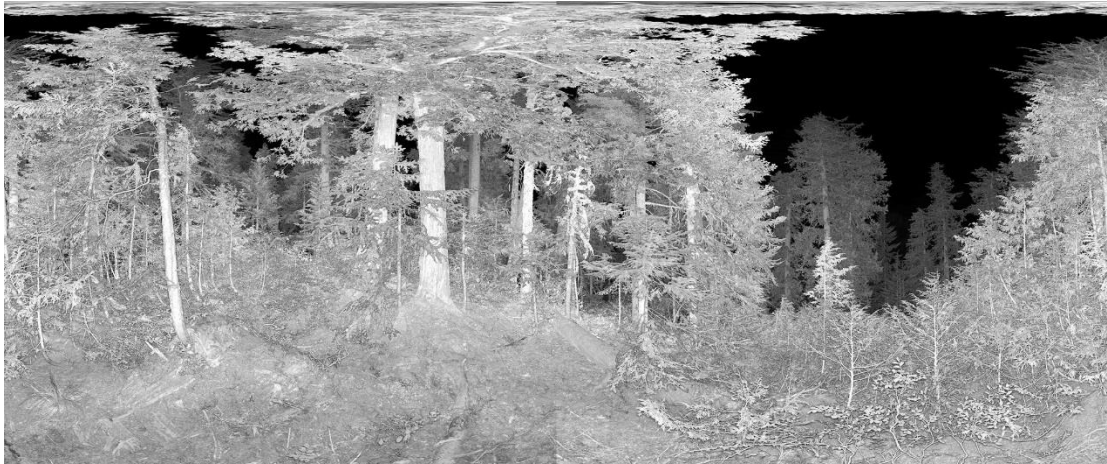

| Scan #/ Plot # / Date / Time  | UTM (NAD 83)        | Aspect / Degree / TT | LiDDI / BA (m <sup>2</sup> /ha) / DBH V (cm) |
|-------------------------------|---------------------|----------------------|----------------------------------------------|
| 000 / CA9 / 10-05-2014 / 1410 | 10T 0542674 4939142 | 280° / 13° / 3m 120° | 3.0 / 25 / 342                               |

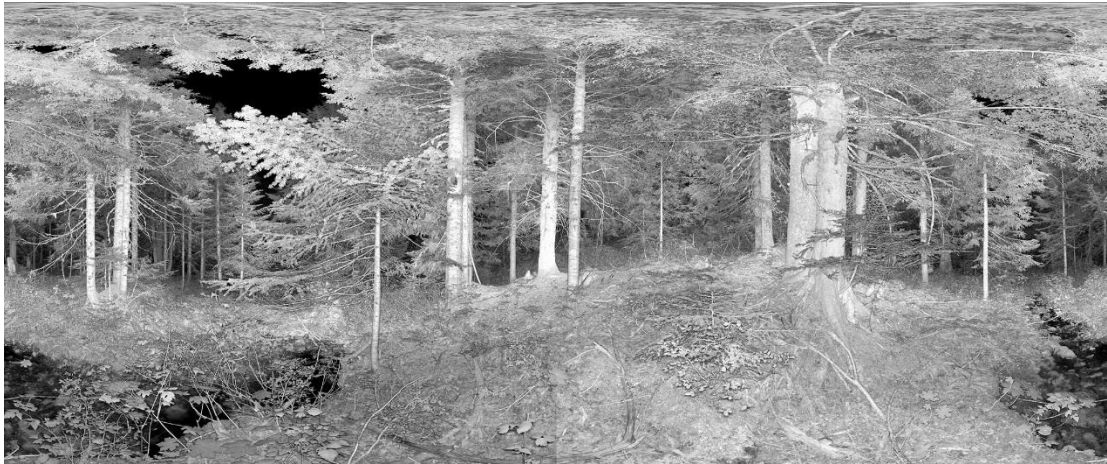

| Scan #/ Plot # / Date / Time  | UTM (NAD 83)        | Aspect / Degree / TT | LiDDI / BA (m <sup>2</sup> /ha) / DBH V (cm) |
|-------------------------------|---------------------|----------------------|----------------------------------------------|
| 001 / CA6 / 10-05-2014 / 1500 | 10T 0542623 4939251 | 15° / 9° / 3m 175°   | 4.2 / 36 / 373                               |

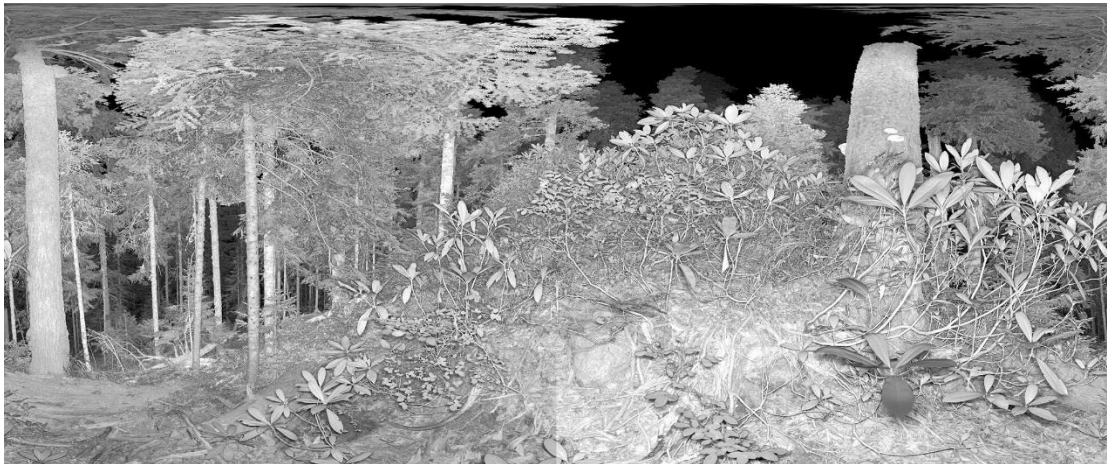

| Scan #/ Plot # / Date / Time  | UTM (NAD 83)        | Aspect / Degree / TT | LiDDI / BA (m <sup>2</sup> /ha) / DBH V (cm) |
|-------------------------------|---------------------|----------------------|----------------------------------------------|
| 002 / CA5 / 10-05-2014 / 1525 | 10T 0542535 4939229 | 60° / 28° / 3m 120°  | 3.0 / 43 / 224                               |

| Name                 | EcoRegion     | Ecological Systems Description                                      |
|----------------------|---------------|---------------------------------------------------------------------|
| Carolyn's Crown (CA) | West Cascades | North Pacific Maritime Mesic-Wet Douglas-fir-Western Hemlock Forest |

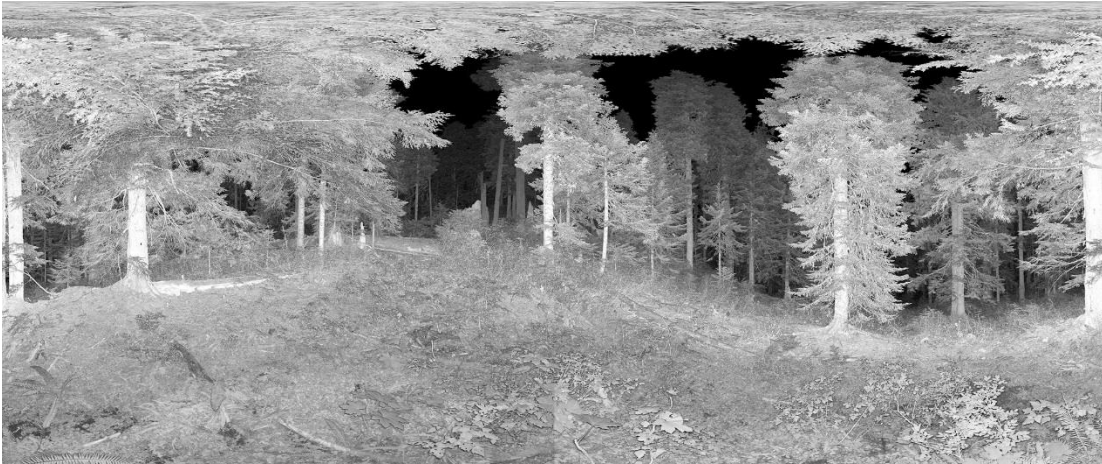

| Scan #/ Plot # / Date / Time  | UTM (NAD 83)        | Aspect / Degree / TT | LiDDI / BA (m <sup>2</sup> /ha) / DBH V (cm) |
|-------------------------------|---------------------|----------------------|----------------------------------------------|
| 003 / CA8 / 10-05-2014 / 1550 | 10T 0542565 4939131 | 50° / 14° / 5m 150°  | 3.6 / 42 / 576                               |

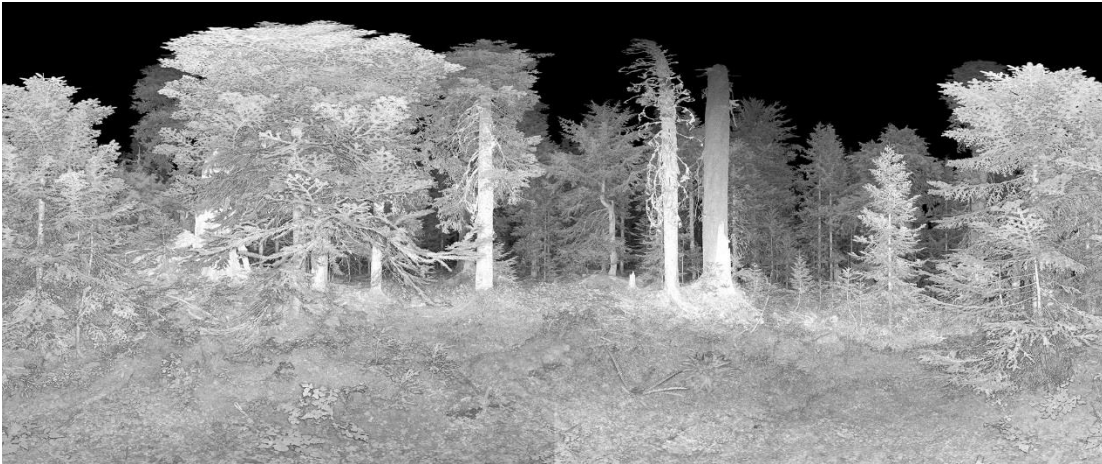

| Scan #/ Plot # / Date / Time  | UTM (NAD 83)        | Aspect / Degree / TT | LiDDI / BA (m <sup>2</sup> /ha) / DBH V (cm) |
|-------------------------------|---------------------|----------------------|----------------------------------------------|
| 004 / CA7 / 10-05-2014 / 1630 | 10T 0542443 4939114 | 50° / 6° / 3m 190°   | 3.0 / 40 / 249                               |

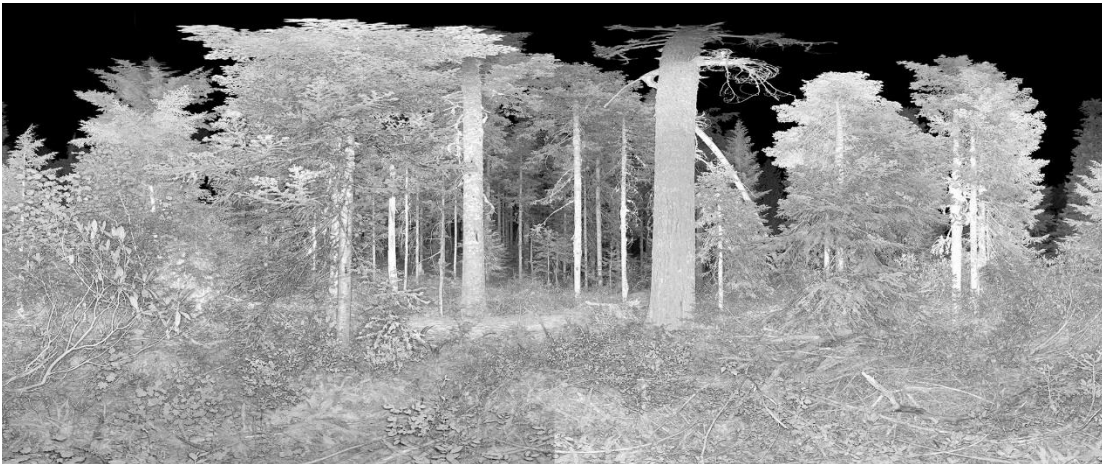

| Scan #/ Plot # / Date / Time  | UTM (NAD 83)        | Aspect / Degree / TT | LiDDI / BA (m <sup>2</sup> /ha) / DBH V (cm) |
|-------------------------------|---------------------|----------------------|----------------------------------------------|
| 005 / CA4 / 10-05-2014 / 1700 | 10T 0542436 4939220 | 60° / 3° / 3m 235°   | 6.0 / 52 / 379                               |

| Name                 | EcoRegion     | Ecological Systems Description                                      |
|----------------------|---------------|---------------------------------------------------------------------|
| Carolyn's Crown (CA) | West Cascades | North Pacific Maritime Mesic-Wet Douglas-fir-Western Hemlock Forest |

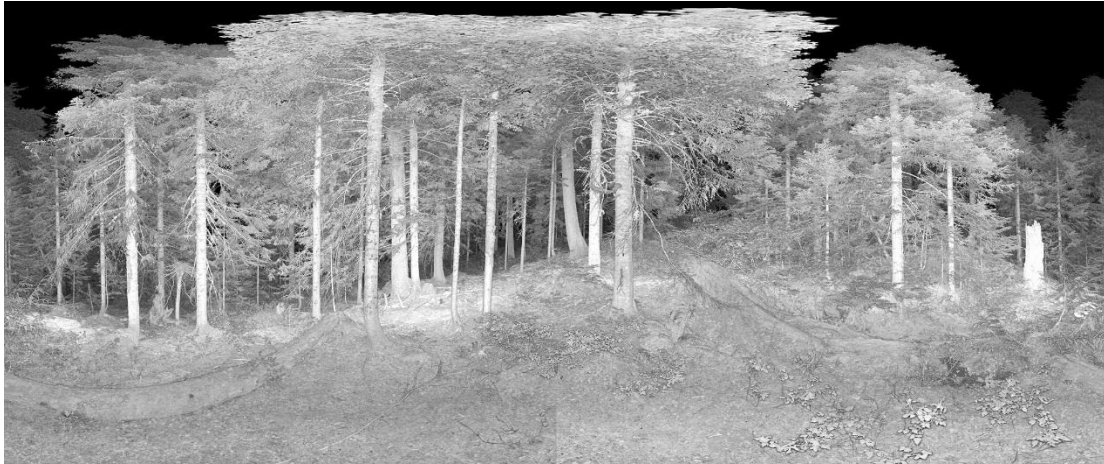

| Scan #/ Plot # / Date / Time  | UTM (NAD 83)        | Aspect / Degree / TT | LiDDI / BA (m <sup>2</sup> /ha) / DBH V (cm) |
|-------------------------------|---------------------|----------------------|----------------------------------------------|
| 006 / CA1 / 10-05-2014 / 1725 | 10T 0542401 4939296 | 80° / 15° / 4m 240°  | 3.0 / 42 / 288                               |

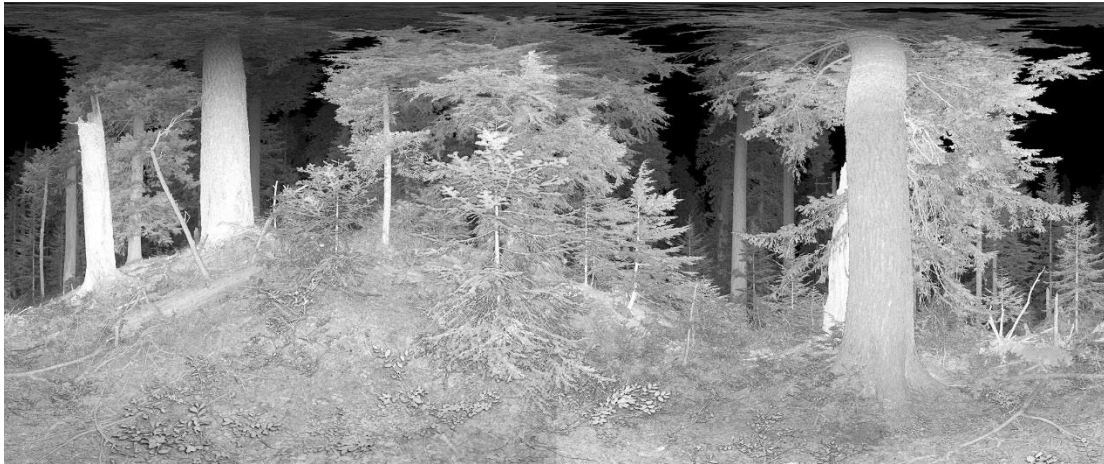

| Scan #/ Plot # / Date / Time  | UTM (NAD 83)        | Aspect / Degree / TT | LiDDI / BA (m <sup>2</sup> /ha) / DBH V (cm) |
|-------------------------------|---------------------|----------------------|----------------------------------------------|
| 007 / CA2 / 10-05-2014 / 1750 | 10T 0542513 4939317 | 90° / 22° / 2m 90°   | 8.7 / 177 / 2957                             |

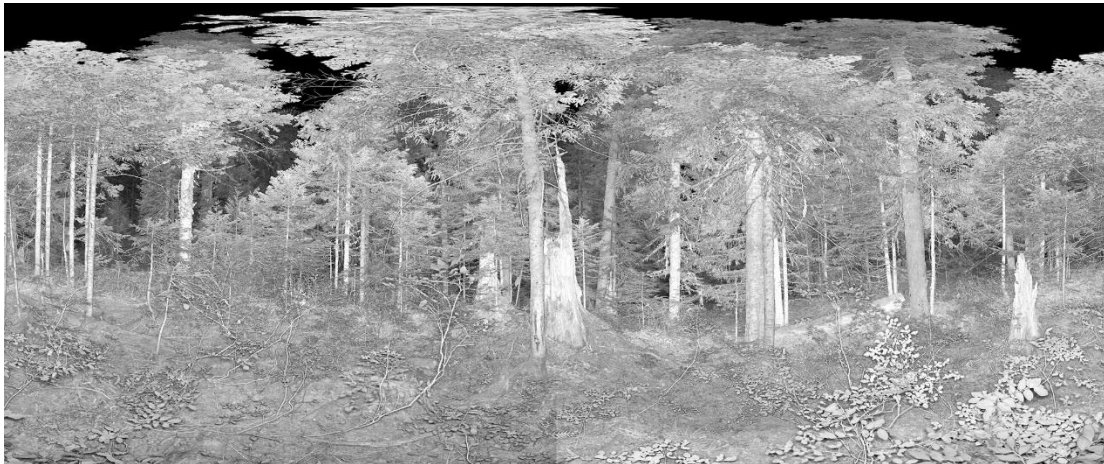

| Scan #/ Plot # / Date / Time  | UTM (NAD 83)        | Aspect / Degree / TT | LiDDI / BA (m <sup>2</sup> /ha) / DBH V (cm) |
|-------------------------------|---------------------|----------------------|----------------------------------------------|
| 008 / CA3 / 10-05-2014 / 1815 | 10T 0542608 4939346 | 110° / 11° / 2m 85°  | 5.7 / 60 / 747                               |

| Name              | EcoRegion         | Ecological Systems Description                                               |
|-------------------|-------------------|------------------------------------------------------------------------------|
| Crooks Creek (CC) | Klamath Mountains | Mediterranean California Lower Montane Black Oak-Conifer Forest and Woodland |

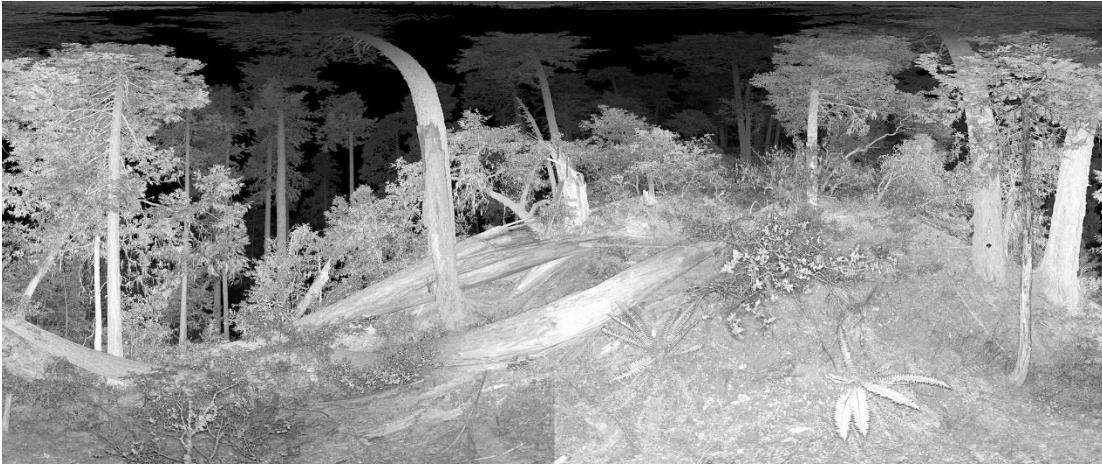

| Scan #/ Plot # / Date / Time  | UTM (NAD 83)        | Aspect / Degree / TT | LiDDI / BA (m <sup>2</sup> /ha) / DBH V (cm) |
|-------------------------------|---------------------|----------------------|----------------------------------------------|
| 000 / CC7 / 09-01-2014 / 1010 | 10T 0461819 4684409 | 312° / 28° / 5m 220° | 4.3 / 45 / 235                               |

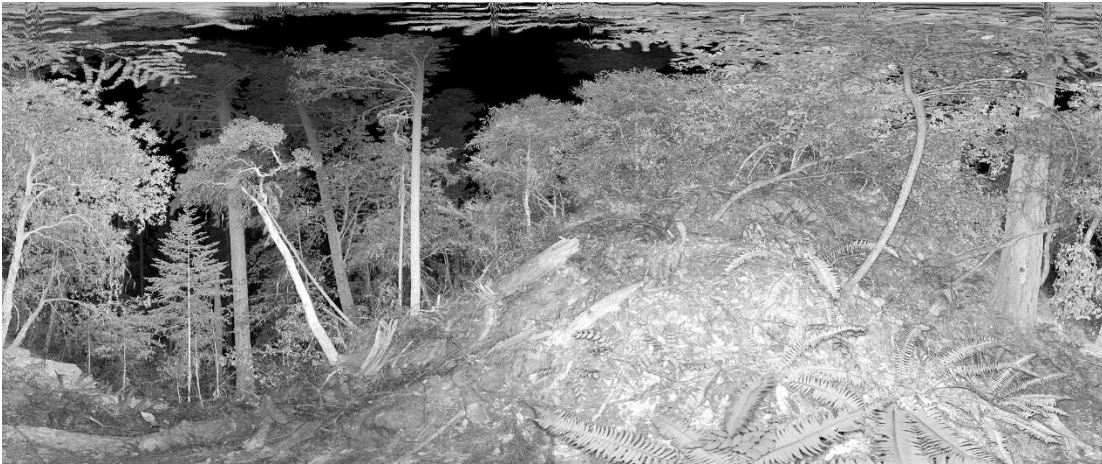

| Scan #/ Plot # / Date / Time  | UTM (NAD 83)        | Aspect / Degree / TT | LiDDI / BA (m <sup>2</sup> /ha) / DBH V (cm) |
|-------------------------------|---------------------|----------------------|----------------------------------------------|
| 001 / CC8 / 09-01-2014 / 1145 | 10T 0461892 4684415 | 350° / 33° / 4m 240° | 3.0 / 37 / 197                               |

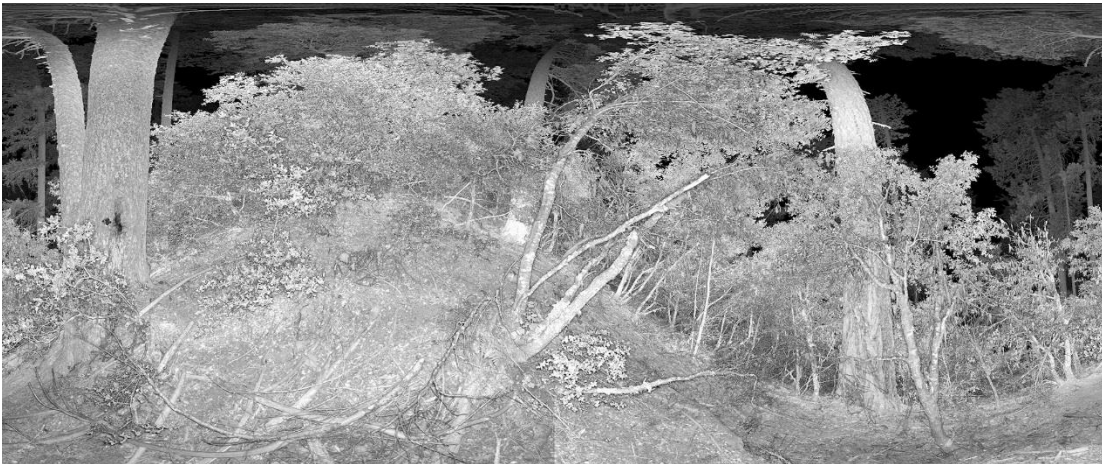

| Scan #/ Plot # / Date / Time  | UTM (NAD 83)        | Aspect / Degree / TT | LiDDI / BA (m <sup>2</sup> /ha) / DBH V (cm) |
|-------------------------------|---------------------|----------------------|----------------------------------------------|
| 002 / CC9 / 09-01-2014 / 1250 | 10T 0462015 4684455 | 310° / 40° / 3m 40°  | 5.7 / 60 / 315                               |

| Name              | EcoRegion         | Ecological Systems Description                                               |
|-------------------|-------------------|------------------------------------------------------------------------------|
| Crooks Creek (CC) | Klamath Mountains | Mediterranean California Lower Montane Black Oak-Conifer Forest and Woodland |

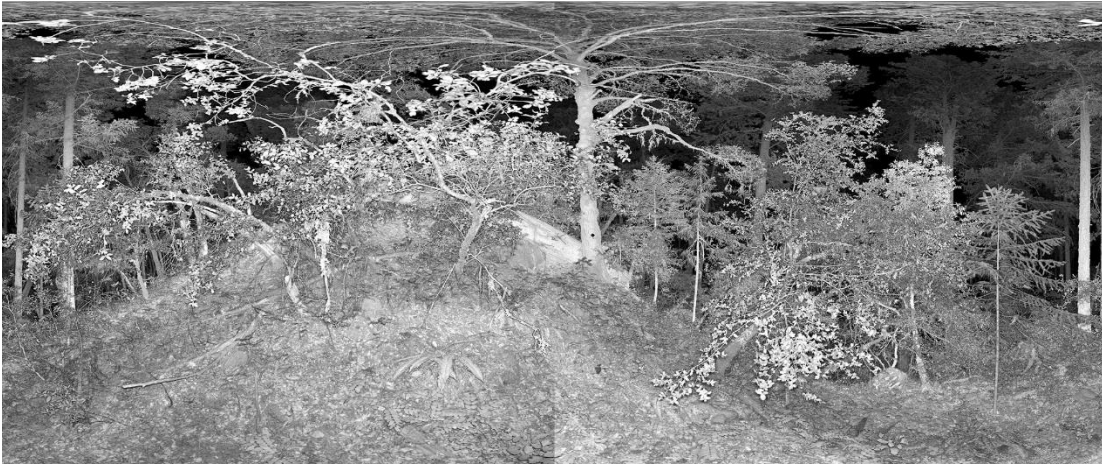

| Scan #/ Plot # / Date / Time  | UTM (NAD 83)        | Aspect / Degree / TT | LiDDI / BA (m <sup>2</sup> /ha) / DBH V (cm) |
|-------------------------------|---------------------|----------------------|----------------------------------------------|
| 003 / CC6 / 09-01-2014 / 1330 | 10T 0461971 4684564 | 190° / 30° / 7m 80°  | 5.2 / 58 / 193                               |

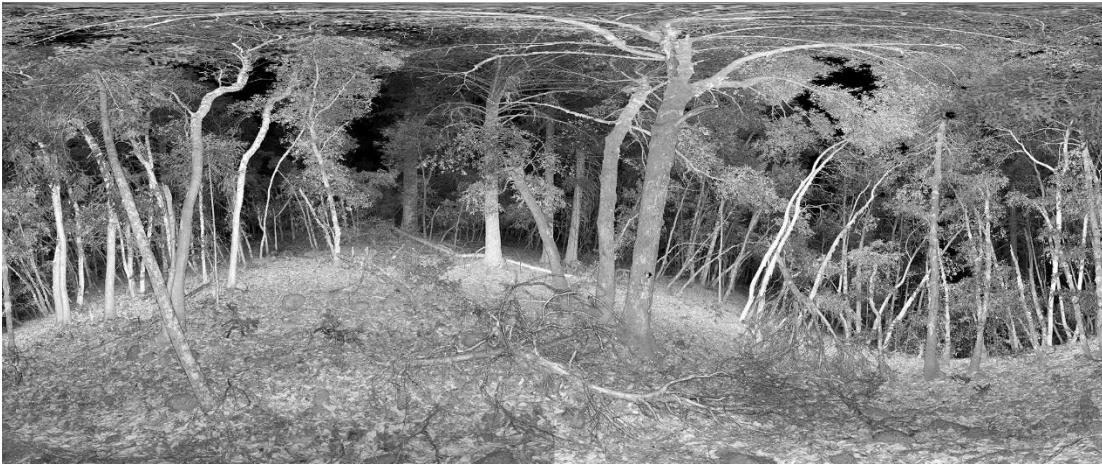

| Scan #/ Plot # / Date / Time  | UTM (NAD 83)        | Aspect / Degree / TT | LiDDI / BA (m <sup>2</sup> /ha) / DBH V (cm) |
|-------------------------------|---------------------|----------------------|----------------------------------------------|
| 004 / CC3 / 09-01-2014 / 1410 | 10T 0461945 4684649 | 225° / 18° / 3m 100° | 3.0 / 54 / 50                                |

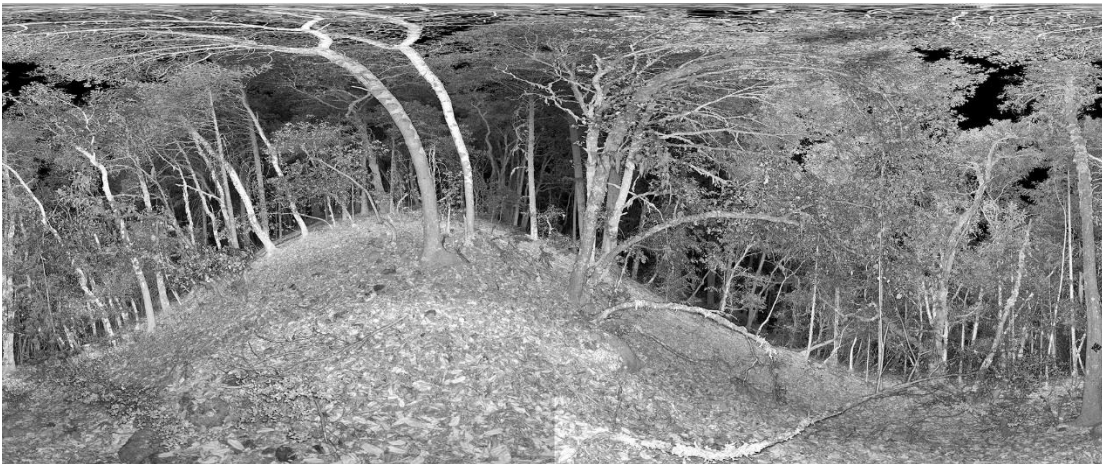

| Scan #/ Plot # / Date / Time  | UTM (NAD 83)        | Aspect / Degree / TT | LiDDI / BA (m <sup>2</sup> /ha) / DBH V (cm) |
|-------------------------------|---------------------|----------------------|----------------------------------------------|
| 005 / CC2 / 09-01-2014 / 1450 | 10T 0461856 4684627 | 180° / 25° / 2m 235° | 3.0 / 35 / 40                                |

| Name              | EcoRegion         | Ecological Systems Description                                               |
|-------------------|-------------------|------------------------------------------------------------------------------|
| Crooks Creek (CC) | Klamath Mountains | Mediterranean California Lower Montane Black Oak-Conifer Forest and Woodland |

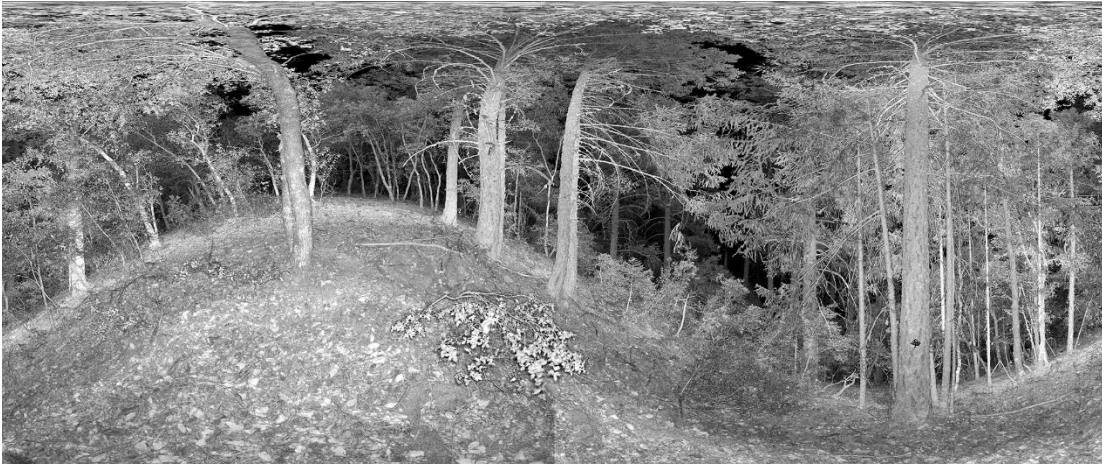

| Scan #/ Plot # / Date / Time  | UTM (NAD 83)        | Aspect / Degree / TT | LiDDI / BA (m <sup>2</sup> /ha) / DBH V (cm) |
|-------------------------------|---------------------|----------------------|----------------------------------------------|
| 006 / CC1 / 09-01-2014 / 1530 | 10T 0461762 4684601 | 190° / 29° / 2m 190° | 3.0 / 43 / 127                               |

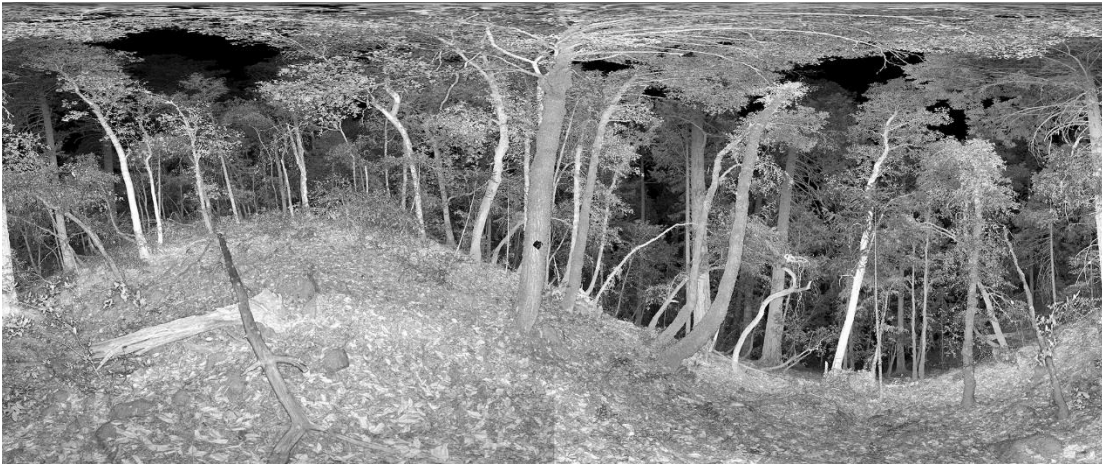

| Scan #/ Plot # / Date / Time  | UTM (NAD 83)        | Aspect / Degree / TT | LiDDI / BA (m <sup>2</sup> /ha) / DBH V (cm) |
|-------------------------------|---------------------|----------------------|----------------------------------------------|
| 007 / CC5 / 09-01-2014 / 1610 | 10T 0461892 4684527 | 220° / 28° / 3m 90°  | 5.4 / 81 / 221                               |

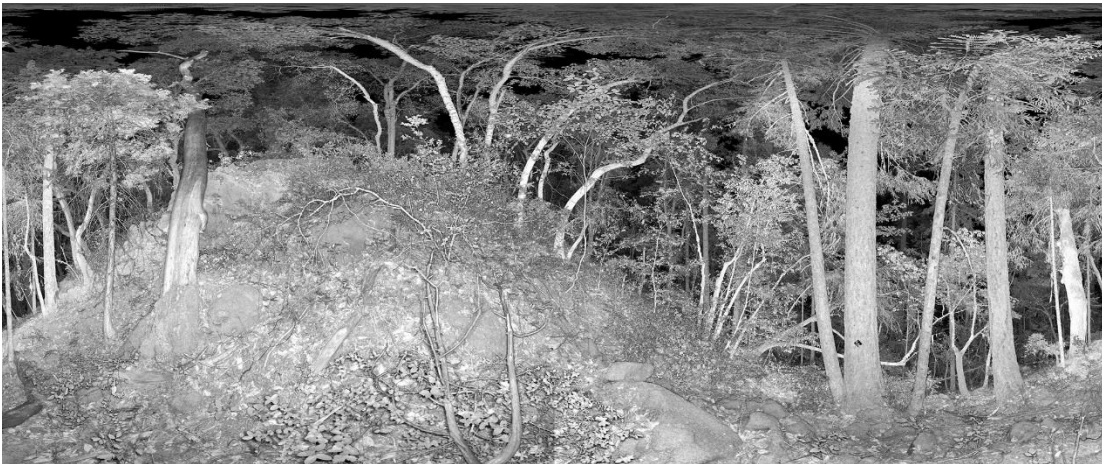

| Scan #/ Plot # / Date / Time  | UTM (NAD 83)        | Aspect / Degree / TT | LiDDI / BA (m <sup>2</sup> /ha) / DBH V (cm) |
|-------------------------------|---------------------|----------------------|----------------------------------------------|
| 008 / CC4 / 09-01-2014 / 1650 | 10T 0461792 4684509 | 190° / 35° / 4m 190° | 3.0 / 52 / 74                                |

| Name              | EcoRegion         | Ecological Systems Description                                   |
|-------------------|-------------------|------------------------------------------------------------------|
| Coburg Hills (CH) | Willamette Valley | North Pacific Lowland Mixed Hardwood-Conifer Forest and Woodland |

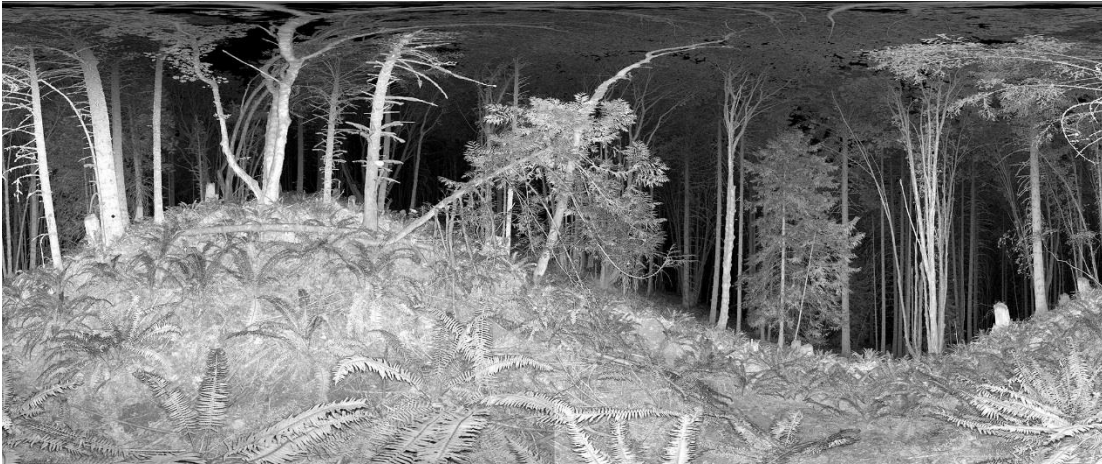

| Scan #/ Plot # / Date / Time  | UTM (NAD 83)        | Aspect / Degree / TT | LiDDI / BA (m <sup>2</sup> /ha) / DBH V (cm) |
|-------------------------------|---------------------|----------------------|----------------------------------------------|
| 000 / CH6 / 09-14-2014 / 1200 | 10T 0505530 4907378 | 35° / 23° / 7m 125°  | 4.0 / 76 / 322                               |

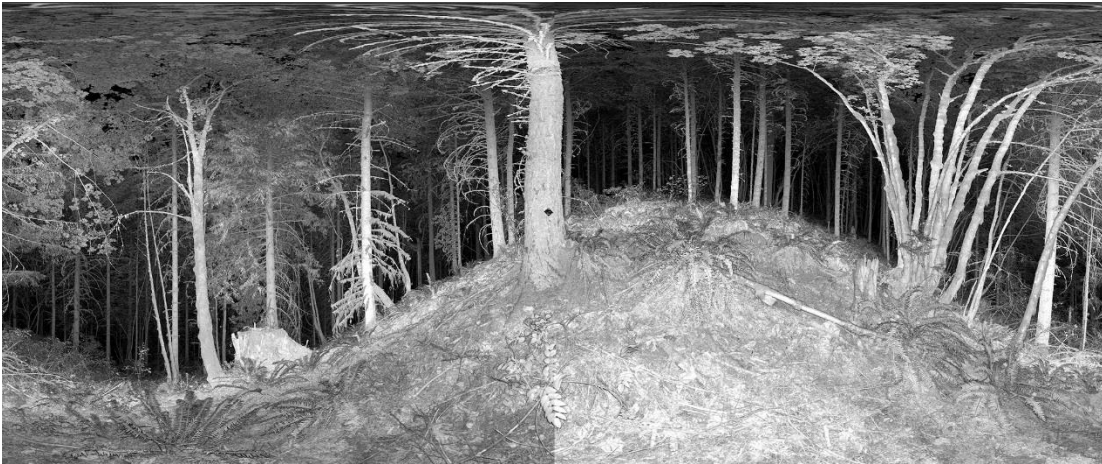

| Scan #/ Plot # / Date / Time  | UTM (NAD 83)        | Aspect / Degree / TT | LiDDI / BA (m <sup>2</sup> /ha) / DBH V (cm) |
|-------------------------------|---------------------|----------------------|----------------------------------------------|
| 001 / CH9 / 09-14-2014 / 1230 | 10T 0505558 4907276 | 60° / 29° / 3m 200°  | 3.0 / 49 / 259                               |

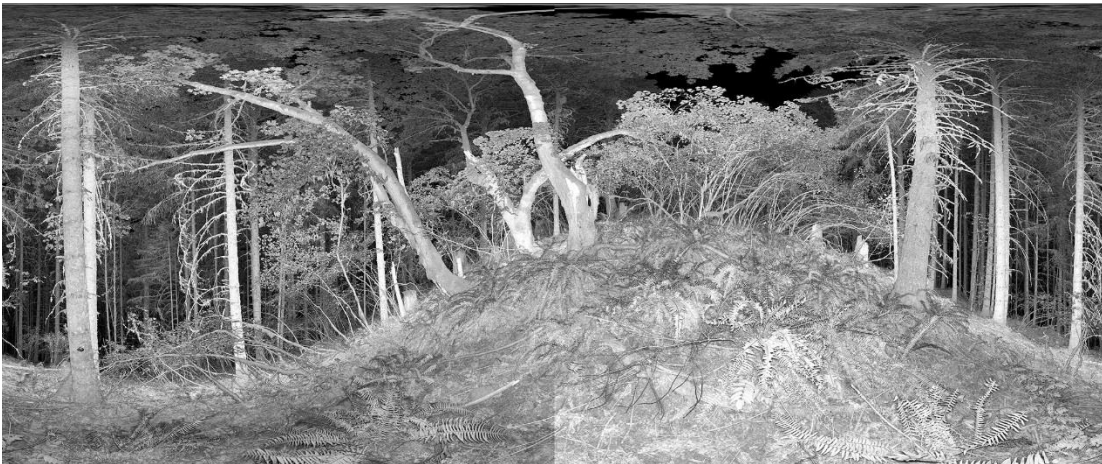

| Scan #/ Plot # / Date / Time  | UTM (NAD 83)        | Aspect / Degree / TT | LiDDI / BA (m <sup>2</sup> /ha) / DBH V (cm) |
|-------------------------------|---------------------|----------------------|----------------------------------------------|
| 002 / CH8 / 09-14-2014 / 1310 | 10T 0505453 4907244 | 95° / 31° / 4m 60°   | 3.0 / 52 / 173                               |

| Name              | EcoRegion         | Ecological Systems Description                                   |
|-------------------|-------------------|------------------------------------------------------------------|
| Coburg Hills (CH) | Willamette Valley | North Pacific Lowland Mixed Hardwood-Conifer Forest and Woodland |

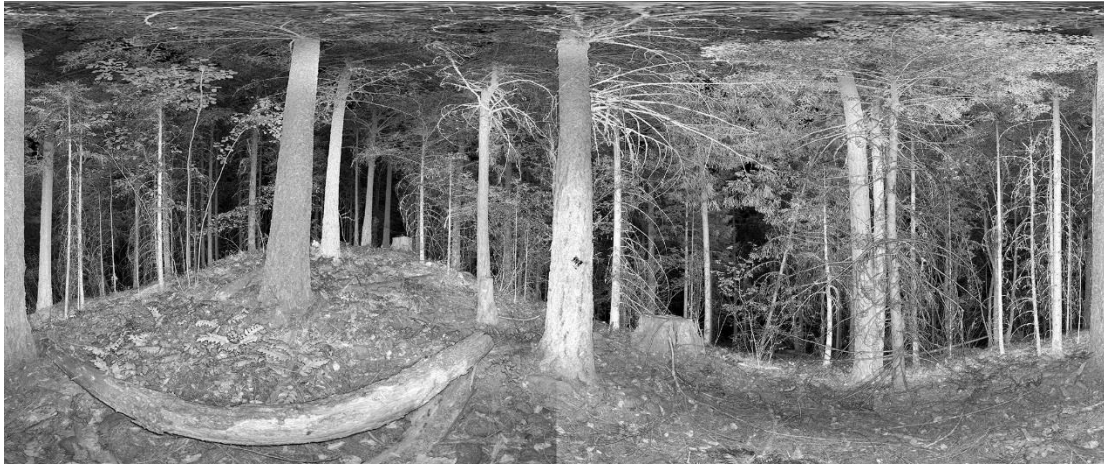

| Scan #/ Plot # / Date / Time  | UTM (NAD 83)        | Aspect / Degree / TT | LiDDI / BA (m <sup>2</sup> /ha) / DBH V (cm) |
|-------------------------------|---------------------|----------------------|----------------------------------------------|
| 003 / CH7 / 09-14-2014 / 1350 | 10T 0505362 4907223 | 250° / 22° / 2m 110° | 3.0 / 59 / 348                               |

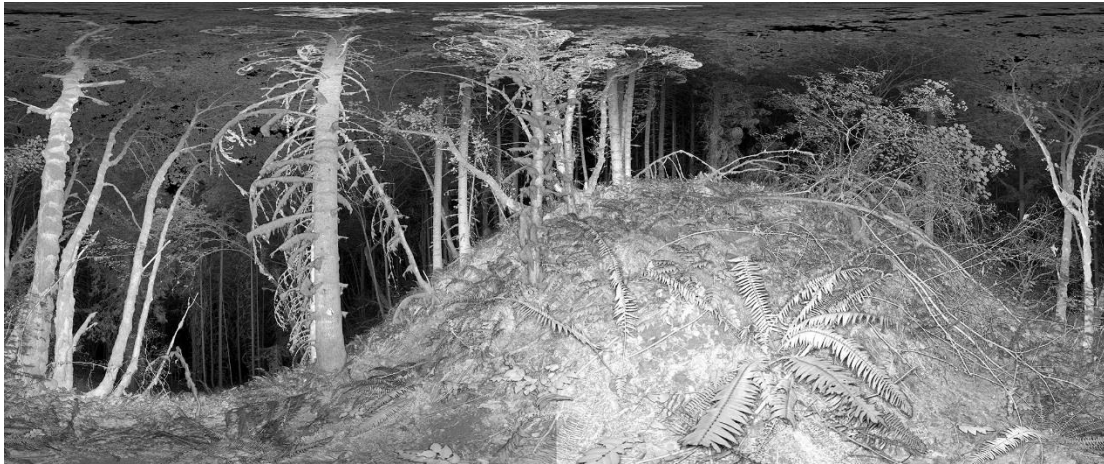

| Scan #/ Plot # / Date / Time  | UTM (NAD 83)        | Aspect / Degree / TT | LiDDI / BA (m <sup>2</sup> /ha) / DBH V (cm) |
|-------------------------------|---------------------|----------------------|----------------------------------------------|
| 004 / CH4 / 09-14-2014 / 1420 | 10T 0505331 4907324 | 340° / 42° / 4m 40°  | 3.0 / 49 / 166                               |

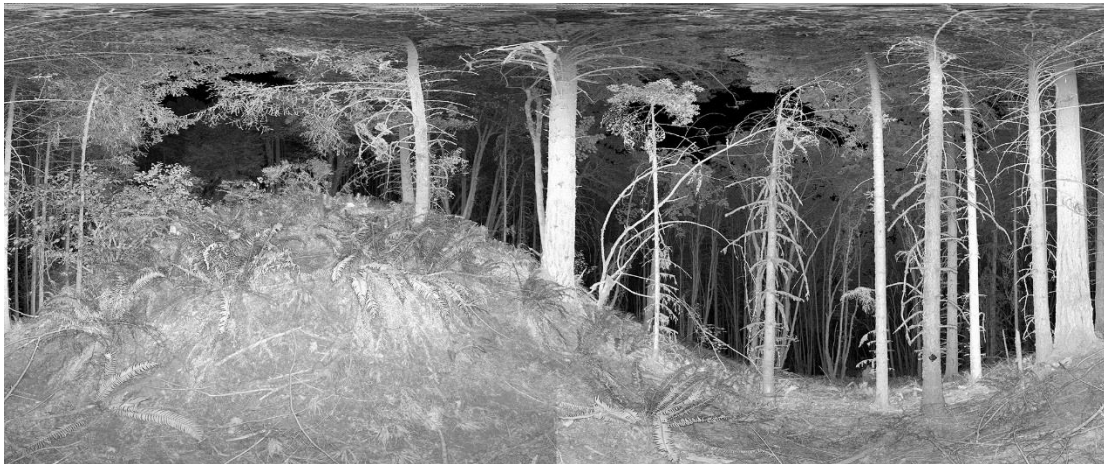

| Scan #/ Plot # / Date / Time  | UTM (NAD 83)        | Aspect / Degree / TT | LiDDI / BA (m <sup>2</sup> /ha) / DBH V (cm) |
|-------------------------------|---------------------|----------------------|----------------------------------------------|
| 005 / CH5 / 09-14-2014 / 1500 | 10T 0505431 4907344 | 30° / 33° / 3m 35°   | 6.0 / 108 / 809                              |

| Name              | EcoRegion         | Ecological Systems Description                                   |
|-------------------|-------------------|------------------------------------------------------------------|
| Coburg Hills (CH) | Willamette Valley | North Pacific Lowland Mixed Hardwood-Conifer Forest and Woodland |

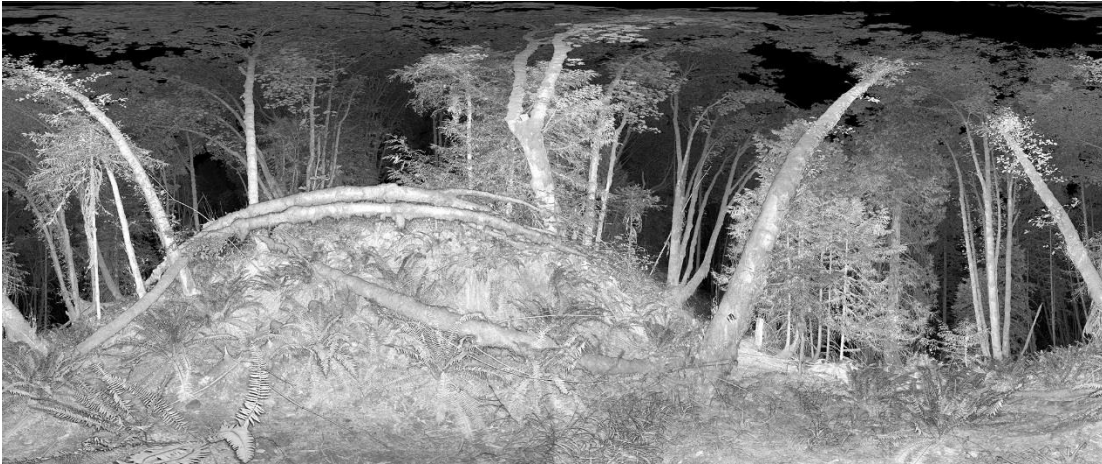

| Scan #/ Plot # / Date / Time  | UTM (NAD 83)        | Aspect / Degree / TT | LiDDI / BA (m <sup>2</sup> /ha) / DBH V (cm) |
|-------------------------------|---------------------|----------------------|----------------------------------------------|
| 006 / CH1 / 09-14-2014 / 1540 | 10T 0505303 4907435 | 330° / 35° / 2m 255° | 3.0 / 51 / 138                               |

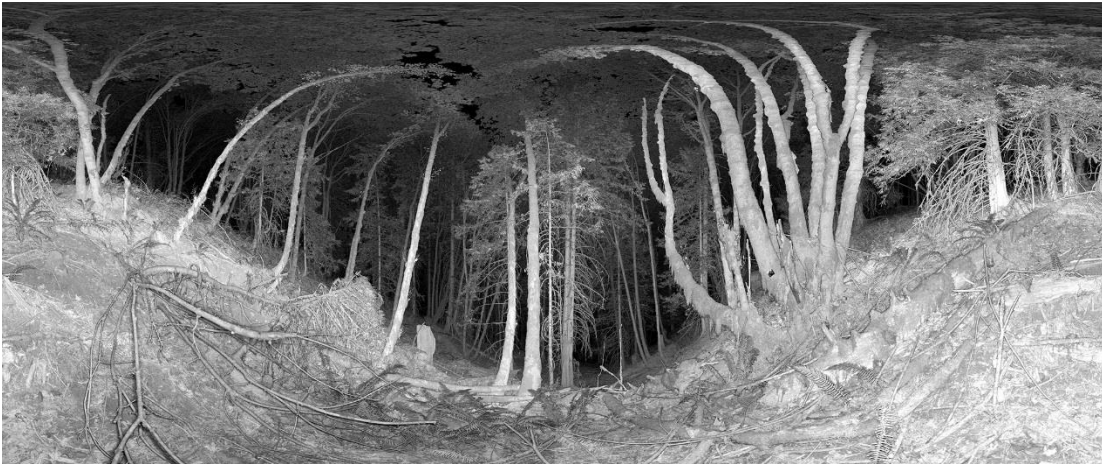

| Scan #/ Plot # / Date / Time  | UTM (NAD 83)        | Aspect / Degree / TT | LiDDI / BA (m <sup>2</sup> /ha) / DBH V (cm) |
|-------------------------------|---------------------|----------------------|----------------------------------------------|
| 007 / CH2 / 09-14-2014 / 1640 | 10T 0505406 4907442 | 320° / 39° / 4m 80°  | 4.2 / 60 / 168                               |

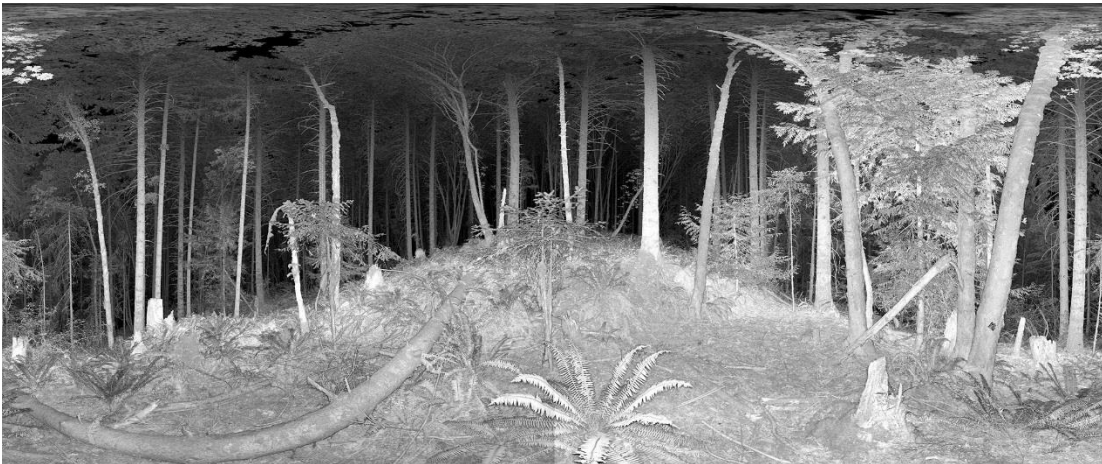

| Scan #/ Plot # / Date / Time  | UTM (NAD 83)        | Aspect / Degree / TT | LiDDI / BA (m <sup>2</sup> /ha) / DBH V (cm) |
|-------------------------------|---------------------|----------------------|----------------------------------------------|
| 008 / CH3 / 09-14-2014 / 1730 | 10T 0505505 4907466 | 340° / 20° / 3m 330° | 6.0 / 78 / 408                               |

| Name              | EcoRegion     | Ecological Systems Description                                       |
|-------------------|---------------|----------------------------------------------------------------------|
| Cultus River (CR) | West Cascades | Mediterranean California Dry-Mesic Mixed Conifer Forest and Woodland |

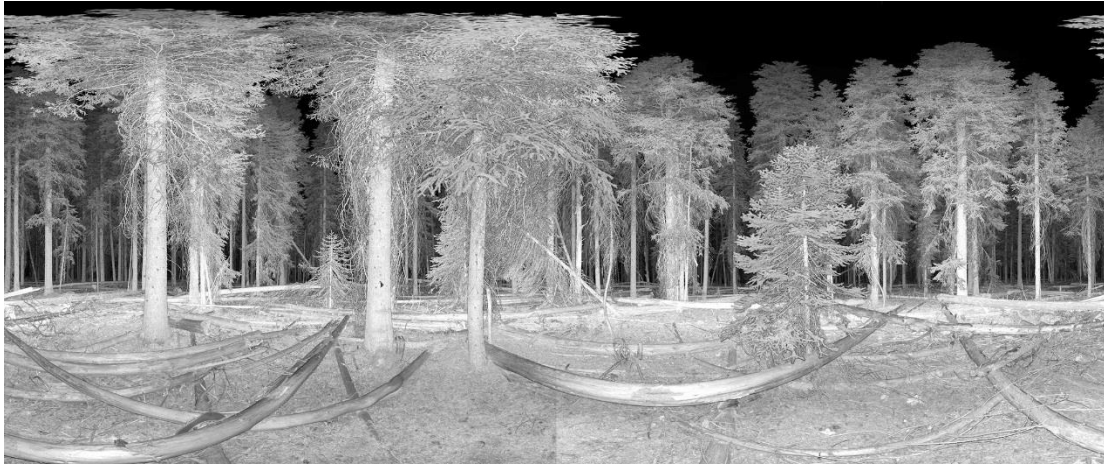

| Scan #/ Plot # / Date / Time  | UTM (NAD 83)        | Aspect / Degree / TT | LiDDI / BA (m <sup>2</sup> /ha) / DBH V (cm) |
|-------------------------------|---------------------|----------------------|----------------------------------------------|
| 000 / CR9 / 09-10-2014 / 1040 | 10T 0597113 4853794 | - / - / 3m 200°      | 2.7 / 19 / 166                               |

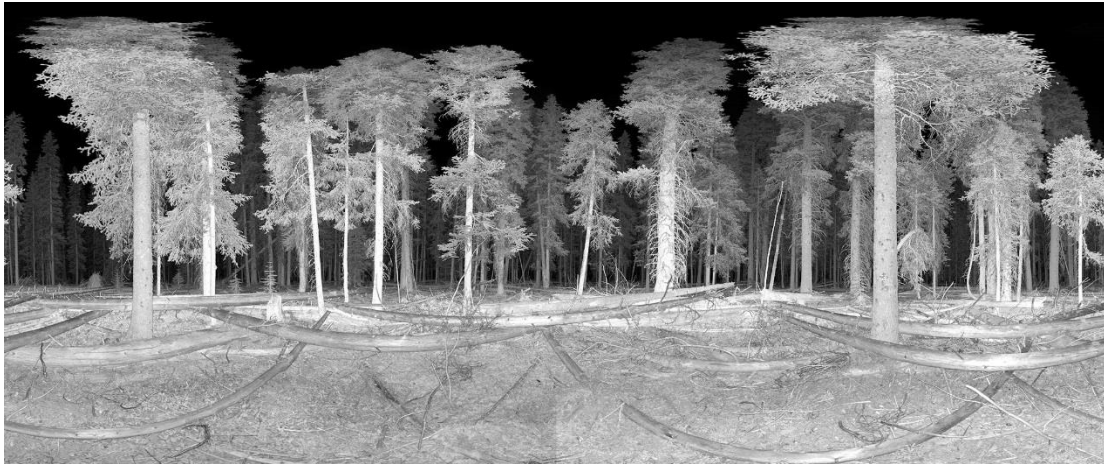

| Scan #/ Plot # / Date / Time  | UTM (NAD 83)        | Aspect / Degree / TT | LiDDI / BA (m <sup>2</sup> /ha) / DBH V (cm) |
|-------------------------------|---------------------|----------------------|----------------------------------------------|
| 001 / CR8 / 09-10-2014 / 1140 | 10T 0597025 4853773 | - / - / 3m 95°       | 7.6 / 107 / 693                              |

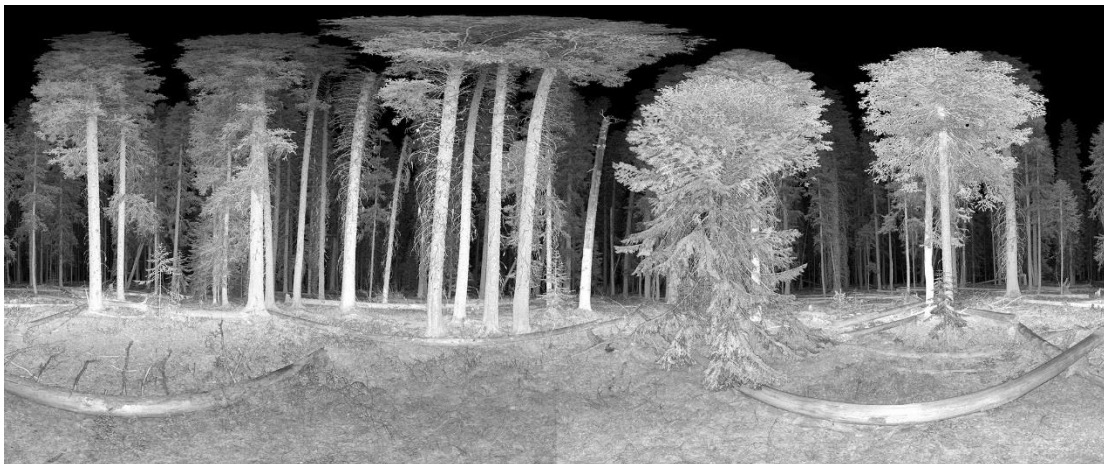

| Scan #/ Plot # / Date / Time  | UTM (NAD 83)        | Aspect / Degree / TT | LiDDI / BA (m <sup>2</sup> /ha) / DBH V (cm) |
|-------------------------------|---------------------|----------------------|----------------------------------------------|
| 002 / CR5 / 09-10-2014 / 1220 | 10T 0597001 4853869 | - / - / 4m 344°      | 6.0 / 94 / 499                               |

| Name              | EcoRegion     | Ecological Systems Description                                       |
|-------------------|---------------|----------------------------------------------------------------------|
| Cultus River (CR) | West Cascades | Mediterranean California Dry-Mesic Mixed Conifer Forest and Woodland |

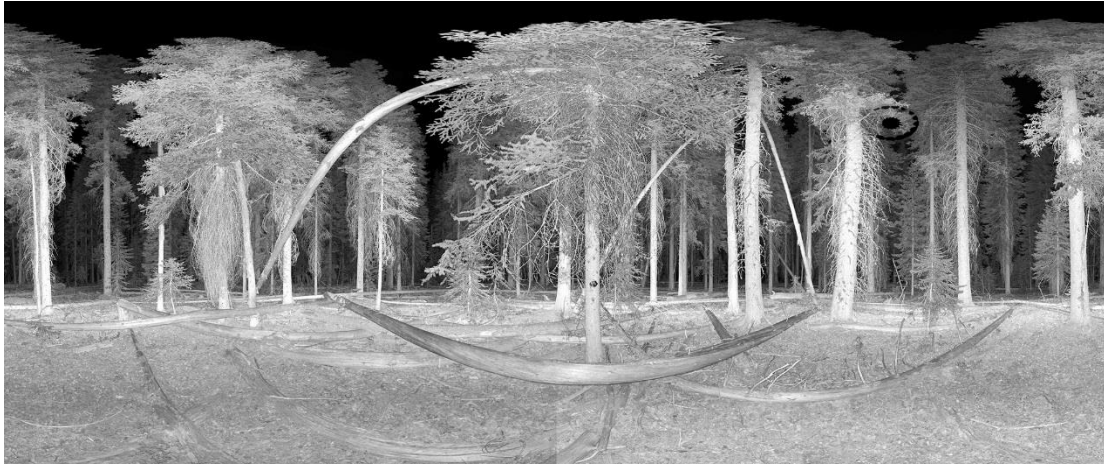

| Scan #/ Plot # / Date / Time  | UTM (NAD 83)        | Aspect / Degree / TT | LiDDI / BA (m <sup>2</sup> /ha) / DBH V (cm) |
|-------------------------------|---------------------|----------------------|----------------------------------------------|
| 003 / CR6 / 09-10-2014 / 1250 | 10T 0597100 4753890 | - / - / 3m 80°       | 6.0 / 163 / 572                              |

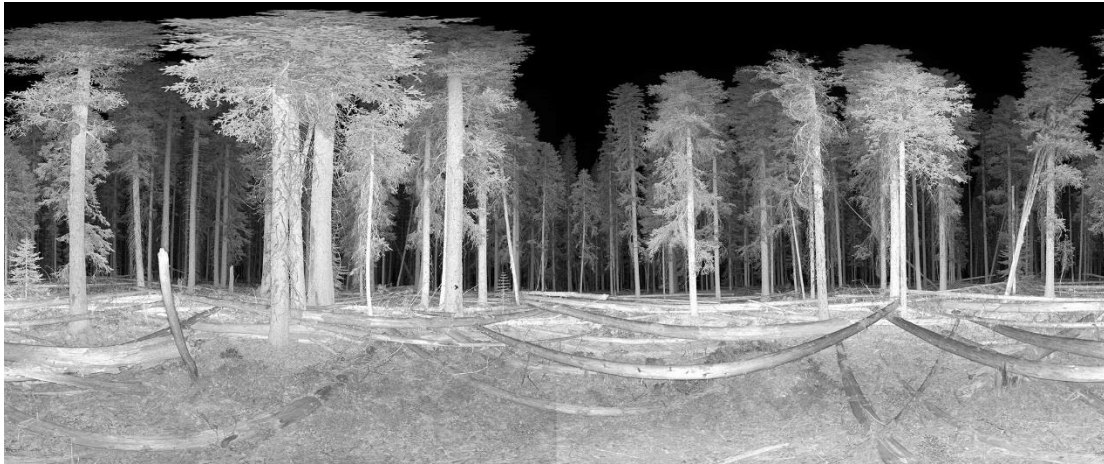

| Scan #/ Plot # / Date / Time  | UTM (NAD 83)        | Aspect / Degree / TT | LiDDI / BA (m <sup>2</sup> /ha) / DBH V (cm) |
|-------------------------------|---------------------|----------------------|----------------------------------------------|
| 004 / CR3 / 09-10-2014 / 1320 | 10T 0597072 4853988 | - / - / 4m 175°      | 3.5 / 47 / 164                               |

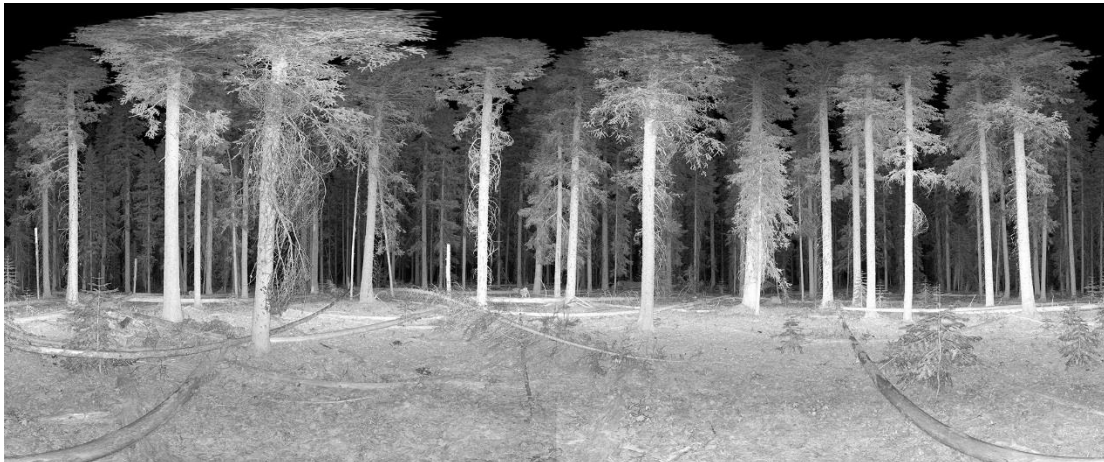

| Scan #/ Plot # / Date / Time  | UTM (NAD 83)        | Aspect / Degree / TT | LiDDI / BA (m <sup>2</sup> /ha) / DBH V (cm) |
|-------------------------------|---------------------|----------------------|----------------------------------------------|
| 005 / CR2 / 09-10-2014 / 1350 | 10T 0596972 4853966 | - / - / 3m 15°       | 5.8 / 184 / 715                              |

| Name              | EcoRegion     | Ecological Systems Description                                       |
|-------------------|---------------|----------------------------------------------------------------------|
| Cultus River (CR) | West Cascades | Mediterranean California Dry-Mesic Mixed Conifer Forest and Woodland |

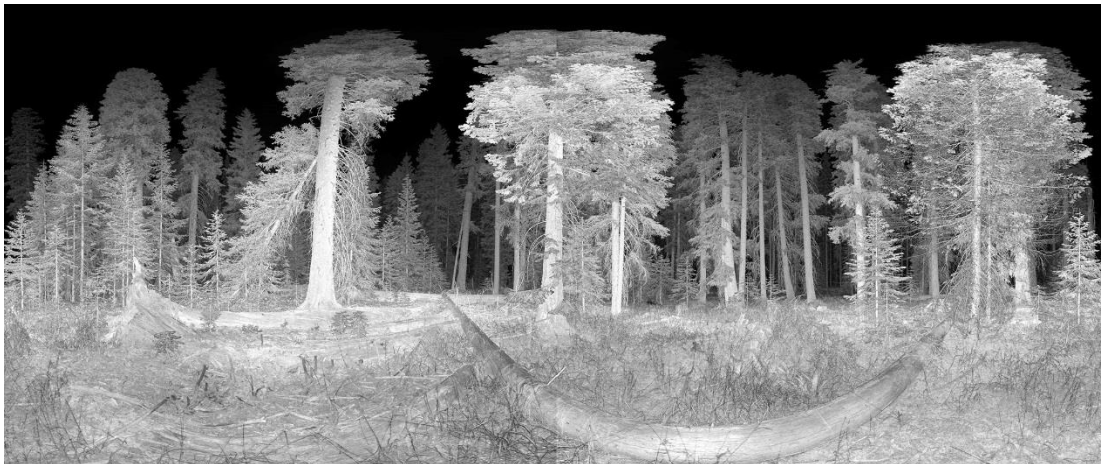

| Scan #/ Plot # / Date / Time  | UTM (NAD 83)        | Aspect / Degree / TT | LiDDI / BA (m <sup>2</sup> /ha) / DBH V (cm) |
|-------------------------------|---------------------|----------------------|----------------------------------------------|
| 006 / CR1 / 09-10-2014 / 1420 | 10T 0596879 4853941 | - / - / 5m 105°      | 6.0 / 152 / 672                              |

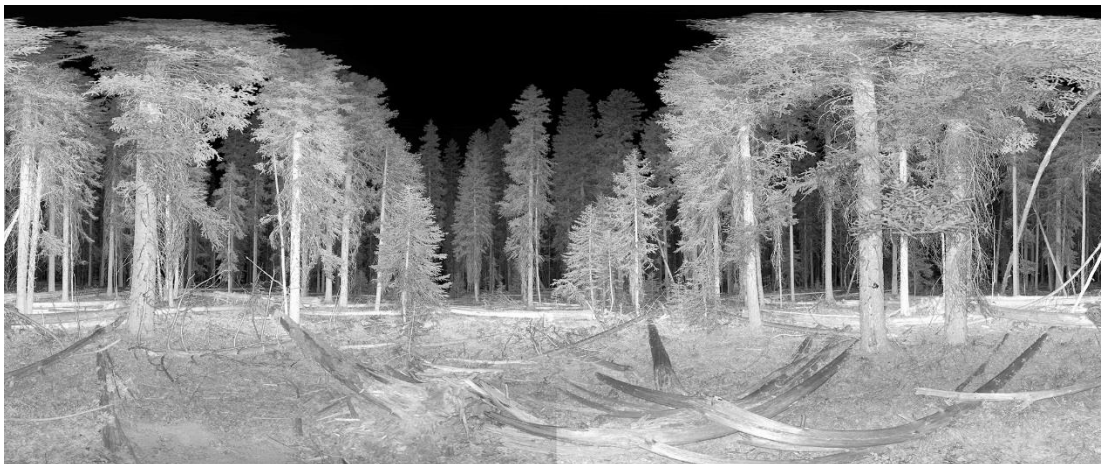

| Scan #/ Plot # / Date / Time  | UTM (NAD 83)        | Aspect / Degree / TT | LiDDI / BA (m <sup>2</sup> /ha) / DBH V (cm) |
|-------------------------------|---------------------|----------------------|----------------------------------------------|
| 007 / CR4 / 09-10-2014 / 1520 | 10T 0596901 4853844 | - / - / 3m 350°      | 1.9 / 5 / 45                                 |

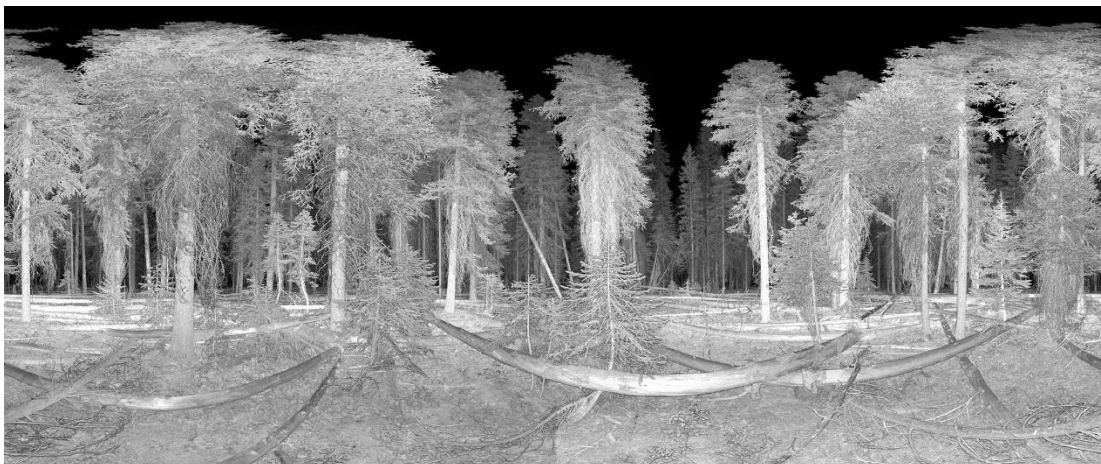

| Scan #/ Plot # / Date / Time  | UTM (NAD 83)        | Aspect / Degree / TT | LiDDI / BA (m <sup>2</sup> /ha) / DBH V (cm) |
|-------------------------------|---------------------|----------------------|----------------------------------------------|
| 008 / CR7 / 09-10-2014 / 1600 | 10T 0596927 4853745 | - / - / 3m 40°       | 3.0 / 29 / 134                               |

| Name             | EcoRegion         | Ecological Systems Description                                   |
|------------------|-------------------|------------------------------------------------------------------|
| Camas Swale (CS) | Willamette Valley | North Pacific Lowland Mixed Hardwood-Conifer Forest and Woodland |

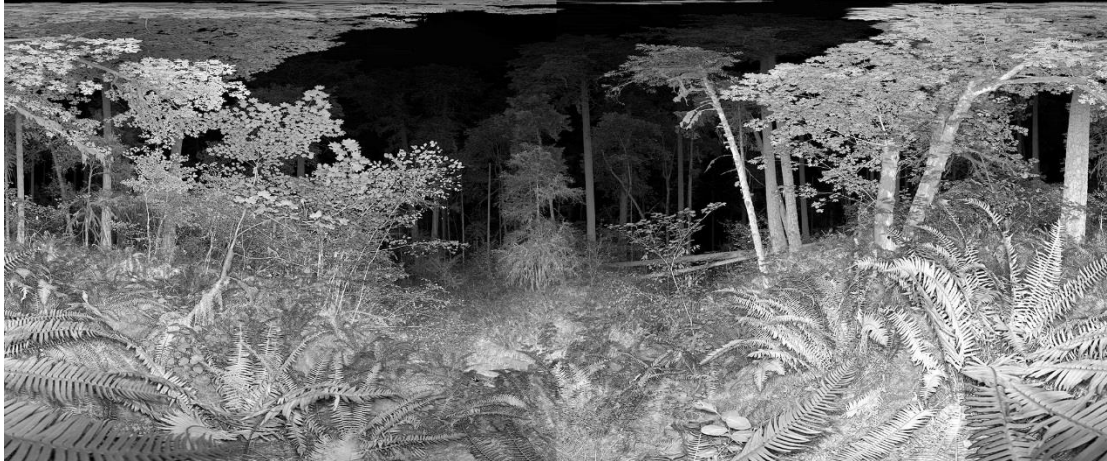

| Scan #/ Plot # / Date / Time  | UTM (NAD 83)        | Aspect / Degree / TT | LiDDI / BA (m <sup>2</sup> /ha) / DBH V (cm) |
|-------------------------------|---------------------|----------------------|----------------------------------------------|
| 000 / CS1 / 09-15-2014 / 1420 | 10T 0490227 4859720 | 345° / 23° / 6m 120° | 3.8 / 38 / 114                               |

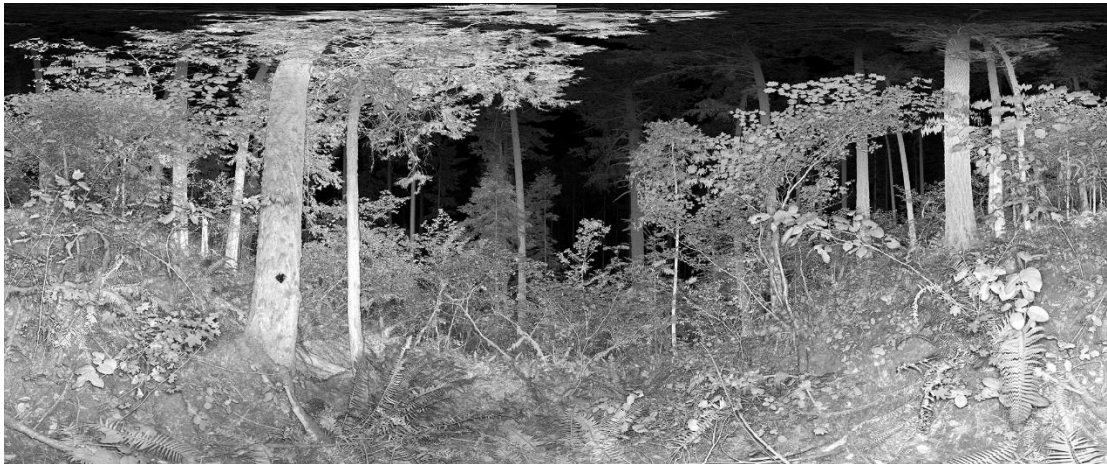

| Scan #/ Plot # / Date / Time  | UTM (NAD 83)        | Aspect / Degree / TT | LiDDI / BA (m <sup>2</sup> /ha) / DBH V (cm) |
|-------------------------------|---------------------|----------------------|----------------------------------------------|
| 001 / CS4 / 09-15-2014 / 1500 | 10T 0490253 4859644 | 300° / 26° / 3m 210° | 2.9 / 34 / 481                               |

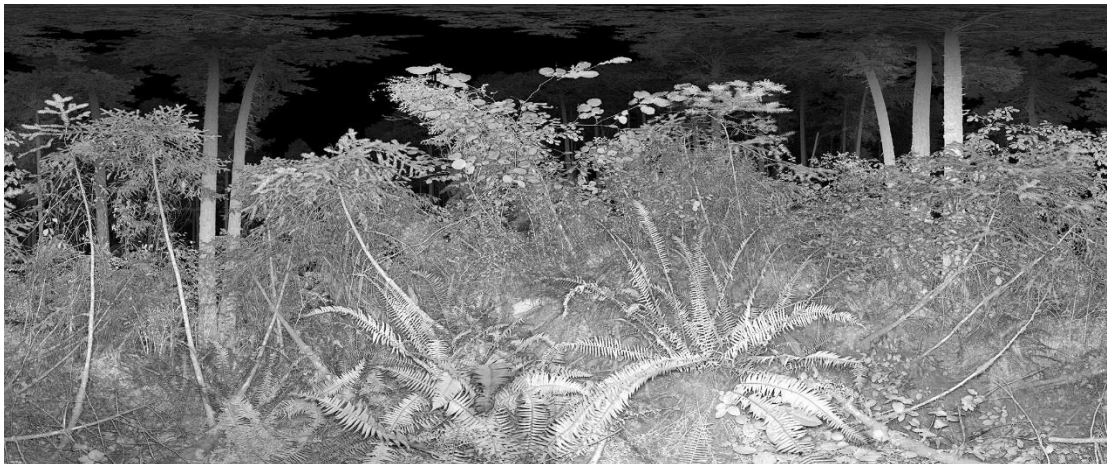

| Scan #/ Plot # / Date / Time  | UTM (NAD 83)        | Aspect / Degree / TT | LiDDI / BA (m <sup>2</sup> /ha) / DBH V (cm) |
|-------------------------------|---------------------|----------------------|----------------------------------------------|
| 002 / CS7 / 09-15-2014 / 1530 | 10T 0490276 4859543 | 300° / 19° / 7m 200° | 2.2 / 16 / 680                               |

| Name             | EcoRegion         | Ecological Systems Description                                   |
|------------------|-------------------|------------------------------------------------------------------|
| Camas Swale (CS) | Willamette Valley | North Pacific Lowland Mixed Hardwood-Conifer Forest and Woodland |

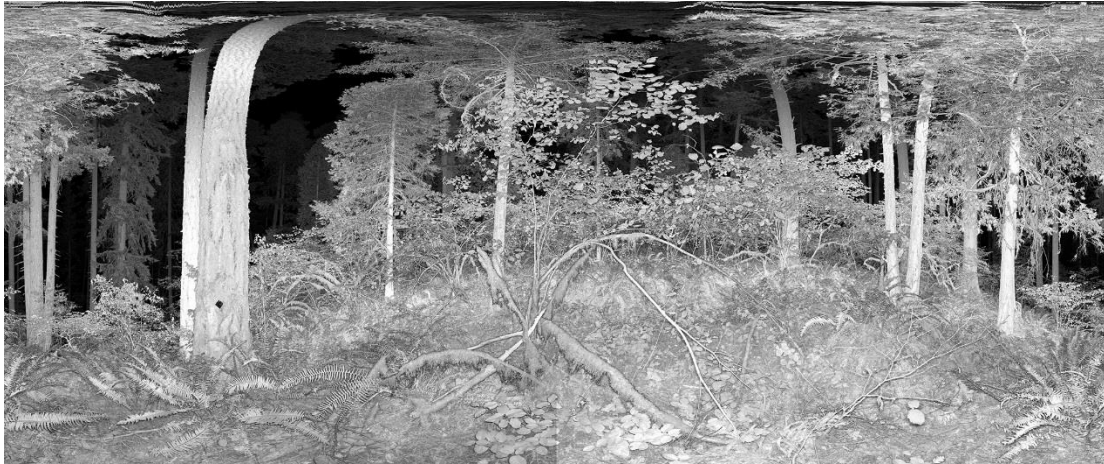

| Scan #/ Plot # / Date / Time  | UTM (NAD 83)        | Aspect / Degree / TT | LiDDI / BA (m <sup>2</sup> /ha) / DBH V (cm) |
|-------------------------------|---------------------|----------------------|----------------------------------------------|
| 003 / CS8 / 09-15-2014 / 1600 | 10T 0490361 4859560 | 5° / 30° / 3m 40°    | 5.5 / 91 / 680                               |

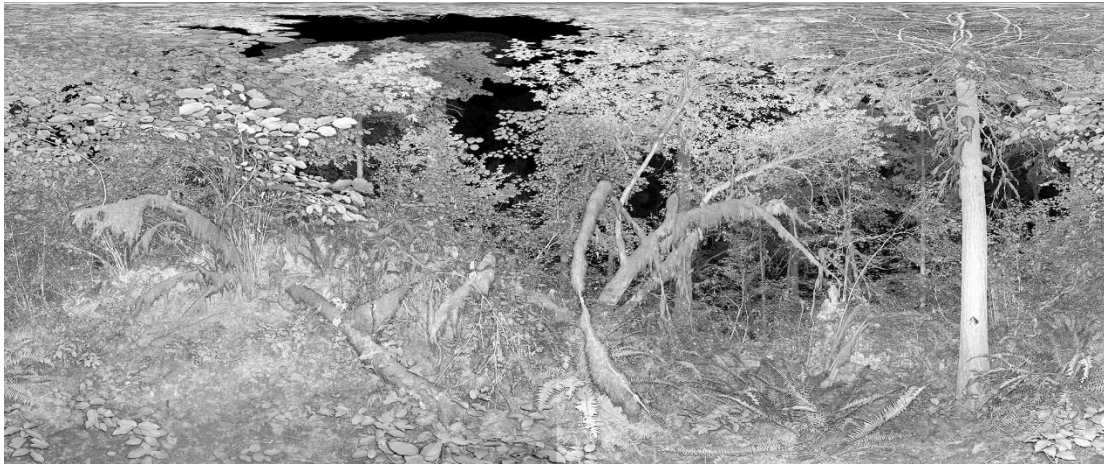

| Scan #/ Plot # / Date / Time  | UTM (NAD 83)        | Aspect / Degree / TT | LiDDI / BA (m <sup>2</sup> /ha) / DBH V (cm) |
|-------------------------------|---------------------|----------------------|----------------------------------------------|
| 004 / CS9 / 09-15-2014 / 1635 | 10T 0490465 4859578 | 330° / 21° / 3m 345° | 2.6 / 14 / 246                               |

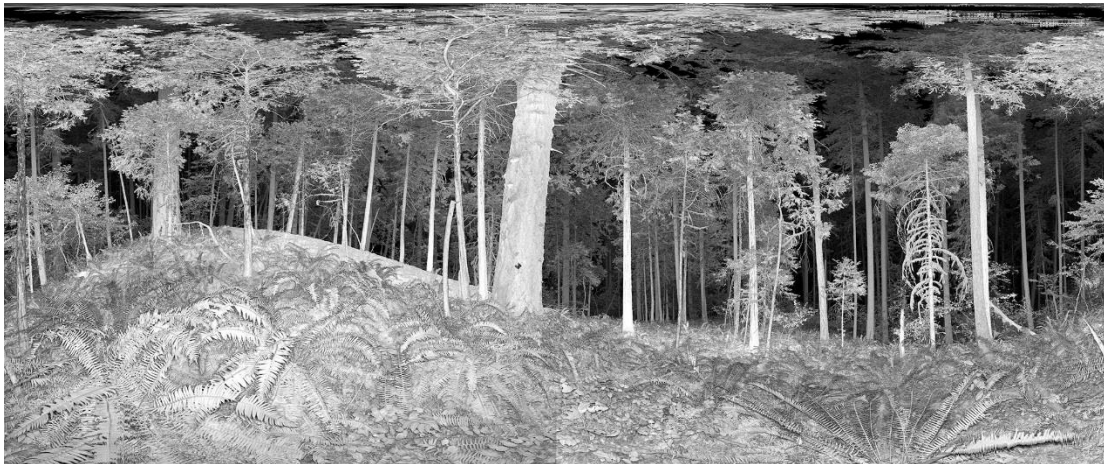

| Scan #/ Plot # / Date / Time  | UTM (NAD 83)        | Aspect / Degree / TT | LiDDI / BA (m <sup>2</sup> /ha) / DBH V (cm) |
|-------------------------------|---------------------|----------------------|----------------------------------------------|
| 005 / CS6 / 09-15-2014 / 1710 | 10T 0490449 4859680 | 310° / 13° / 4m 220° | 6.0 / 77 / 873                               |

| Name             | EcoRegion         | Ecological Systems Description                                   |
|------------------|-------------------|------------------------------------------------------------------|
| Camas Swale (CS) | Willamette Valley | North Pacific Lowland Mixed Hardwood-Conifer Forest and Woodland |

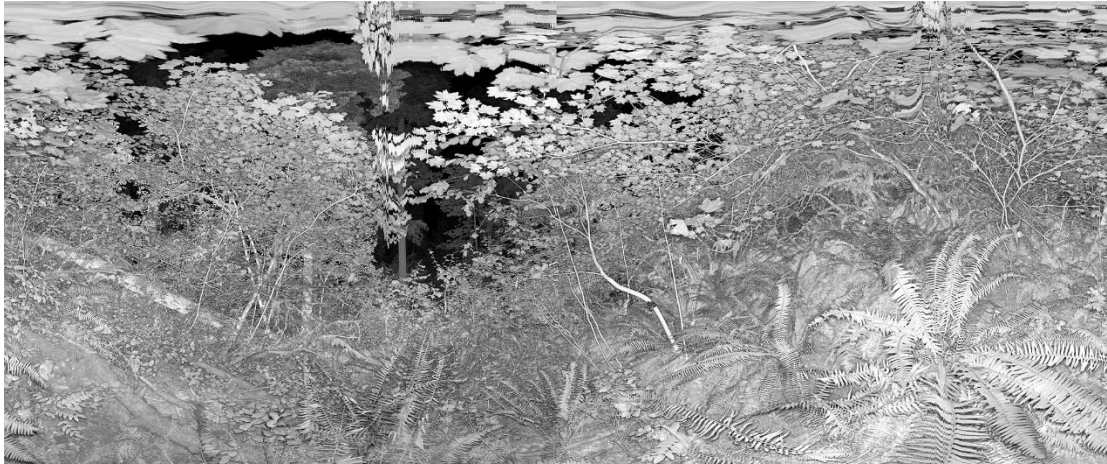

| Scan #/ Plot # / Date / Time  | UTM (NAD 83)        | Aspect / Degree / TT | LiDDI / BA (m <sup>2</sup> /ha) / DBH V (cm) |
|-------------------------------|---------------------|----------------------|----------------------------------------------|
| 006 / CS5 / 09-15-2014 / 1750 | 10T 0490345 4859651 | 20° / 28° / 2m 100°  | 0.9 / 1 / -                                  |

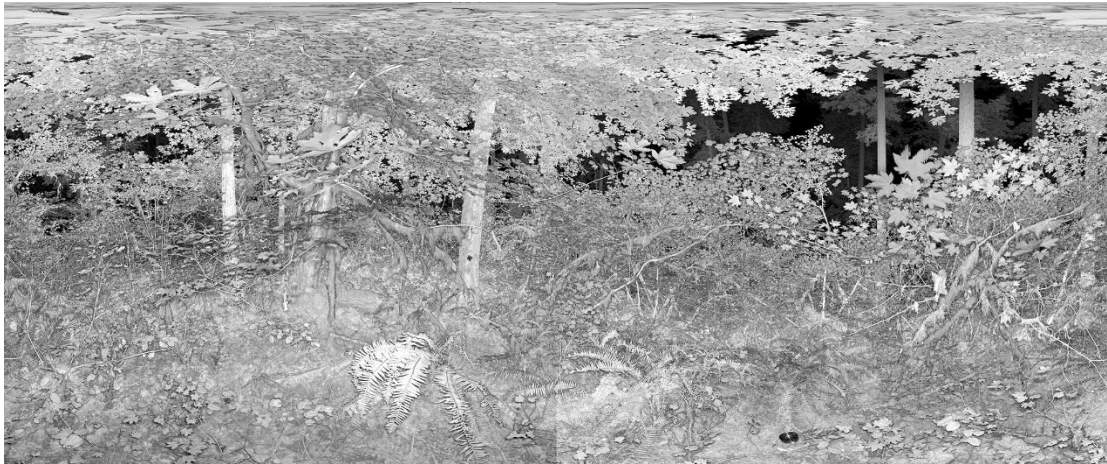

| Scan #/ Plot # / Date / Time  | UTM (NAD 83)        | Aspect / Degree / TT | LiDDI / BA (m <sup>2</sup> /ha) / DBH V (cm) |
|-------------------------------|---------------------|----------------------|----------------------------------------------|
| 007 / CS2 / 09-15-2014 / 1820 | 10T 0490325 4859740 | 280° / 16° / 4m 170° | 2.8 / 12 / 270                               |

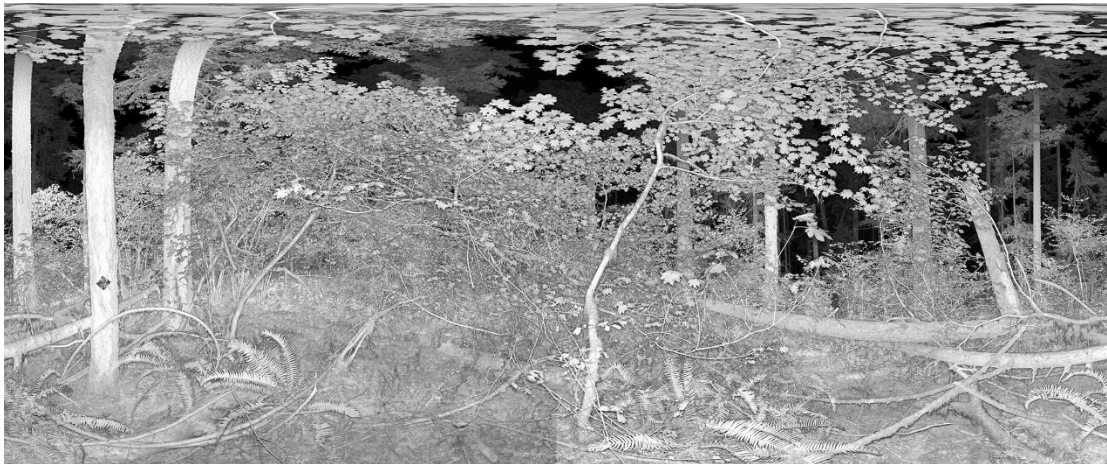

| Scan #/ Plot # / Date / Time  | UTM (NAD 83)        | Aspect / Degree / TT | LiDDI / BA (m <sup>2</sup> /ha) / DBH V (cm) |
|-------------------------------|---------------------|----------------------|----------------------------------------------|
| 008 / CS3 / 09-15-2014 / 1850 | 10T 0490418 4859781 | 290° / 10° / 2m 40°  | 3.0 / 24 / 338                               |

| Name             | EcoRegion         | Ecological Systems Description                                               |
|------------------|-------------------|------------------------------------------------------------------------------|
| French Flat (FF) | Klamath Mountains | Mediterranean California Lower Montane Black Oak-Conifer Forest and Woodland |

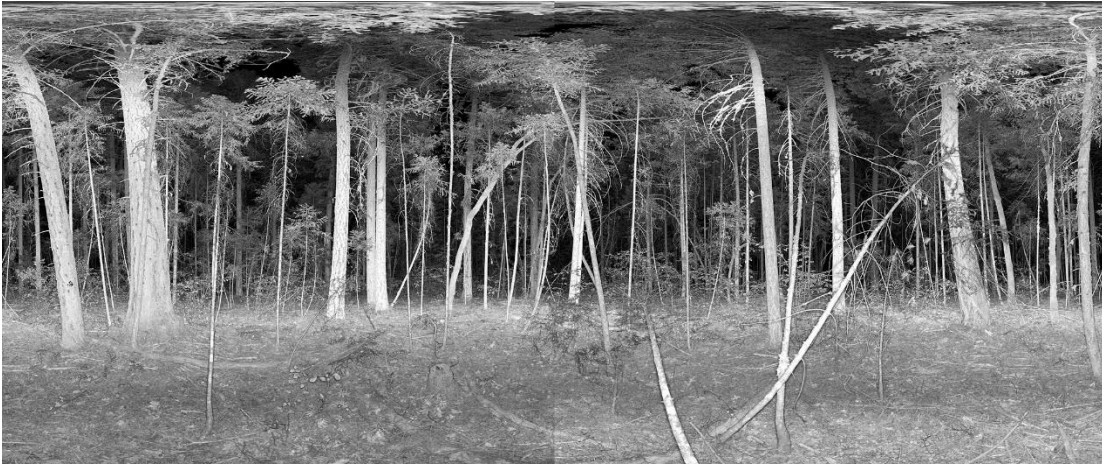

| Scan #/ Plot # / Date / Time  | UTM (NAD 83)        | Aspect / Degree / TT | LiDDI / BA (m <sup>2</sup> /ha) / DBH V (cm) |
|-------------------------------|---------------------|----------------------|----------------------------------------------|
| 000 / FF3 / 09-02-2014 / 1330 | 10T 0448297 4659952 | - / - / 3m 275°      | 4.0 / 70 / 127                               |

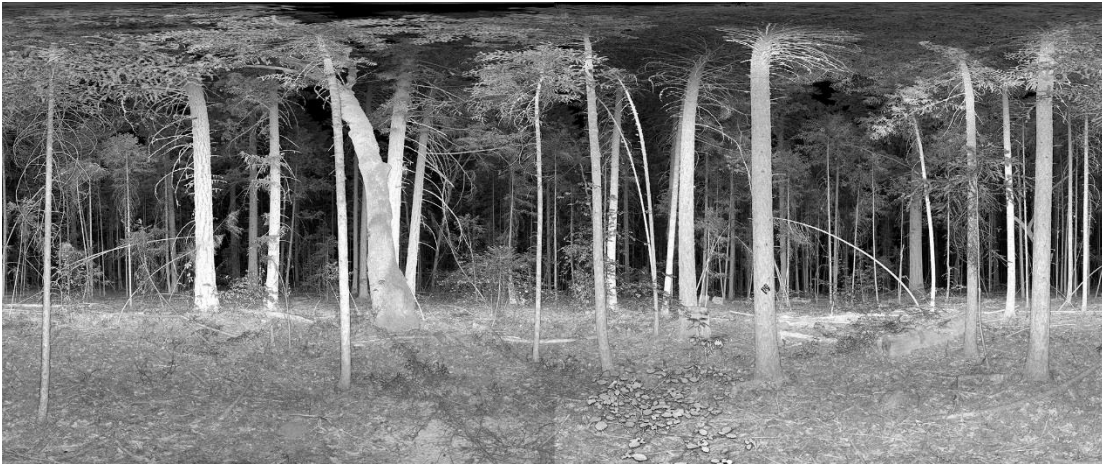

| Scan #/ Plot # / Date / Time  | UTM (NAD 83)        | Aspect / Degree / TT | LiDDI / BA (m <sup>2</sup> /ha) / DBH V (cm) |
|-------------------------------|---------------------|----------------------|----------------------------------------------|
| 001 / FF6 / 09-02-2014 / 1420 | 10T 0448330 4659852 | - / - / 3m 90°       | 5.0 / 94 / 194                               |

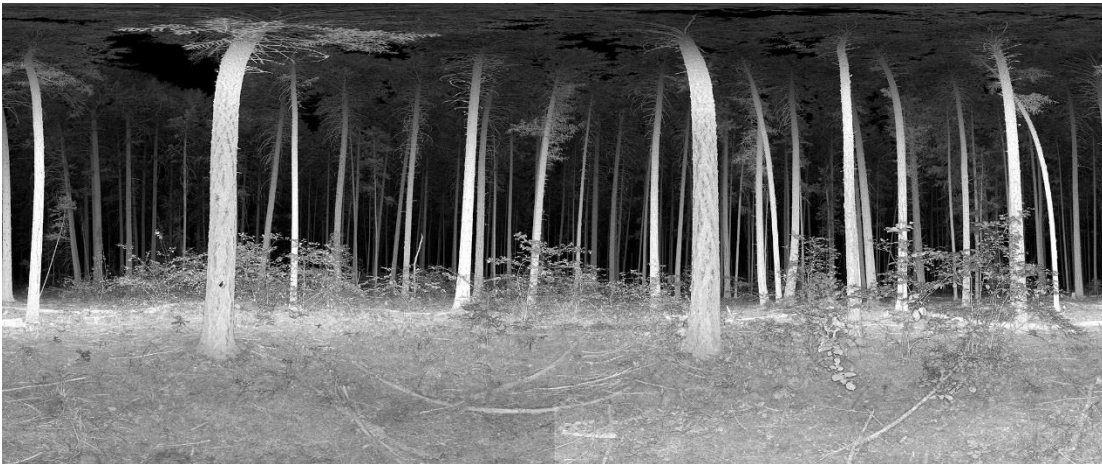

| Scan #/ Plot # / Date / Time  | UTM (NAD 83)        | Aspect / Degree / TT | LiDDI / BA (m <sup>2</sup> /ha) / DBH V (cm) |
|-------------------------------|---------------------|----------------------|----------------------------------------------|
| 002 / FF5 / 09-02-2014 / 1450 | 10T 0448229 4659828 | - / - / 3m 10°       | 3.0 / 82 / 84                                |

| Name             | EcoRegion         | Ecological Systems Description                                               |
|------------------|-------------------|------------------------------------------------------------------------------|
| French Flat (FF) | Klamath Mountains | Mediterranean California Lower Montane Black Oak-Conifer Forest and Woodland |

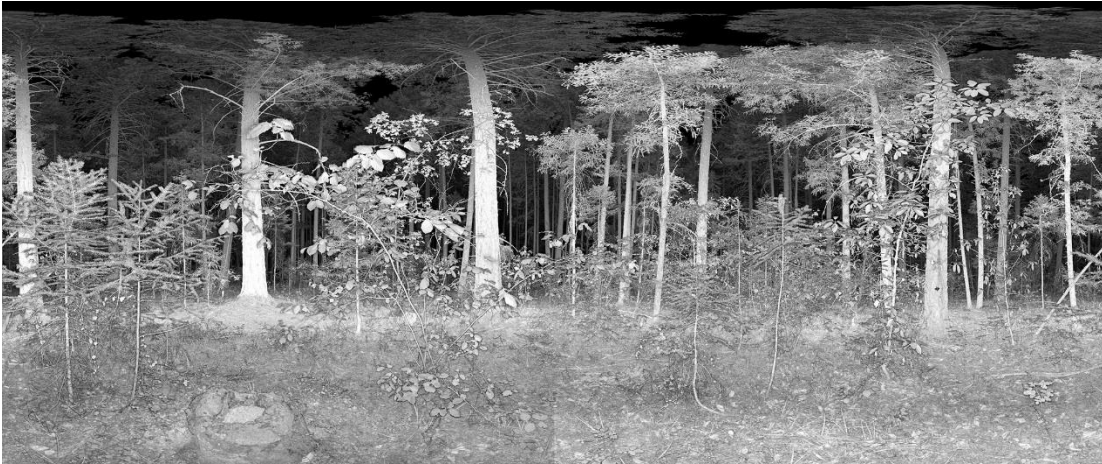

| Scan #/ Plot # / Date / Time  | UTM (NAD 83)        | Aspect / Degree / TT | LiDDI / BA (m <sup>2</sup> /ha) / DBH V (cm) |
|-------------------------------|---------------------|----------------------|----------------------------------------------|
| 003 / FF2 / 09-02-2014 / 1520 | 10T 0448200 4659926 | - / - / 3m 32°       | 4.1 / 48 / 272                               |

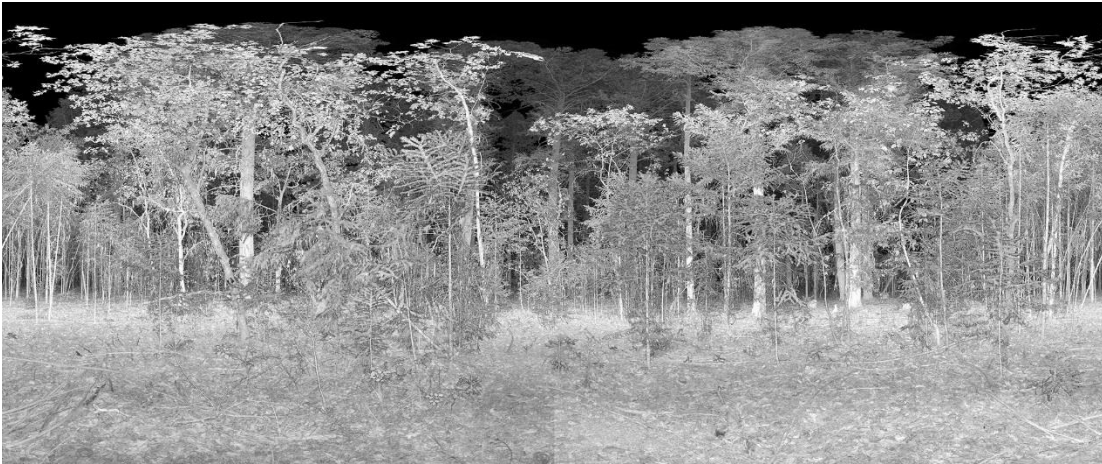

| Scan #/ Plot # / Date / Time  | UTM (NAD 83)        | Aspect / Degree / TT | LiDDI / BA (m <sup>2</sup> /ha) / DBH V (cm) |
|-------------------------------|---------------------|----------------------|----------------------------------------------|
| 004 / FF1 / 09-02-2014 / 1545 | 10T 0448104 4659906 | - / - / 3m 260°      | 0.4 / 0 / -                                  |

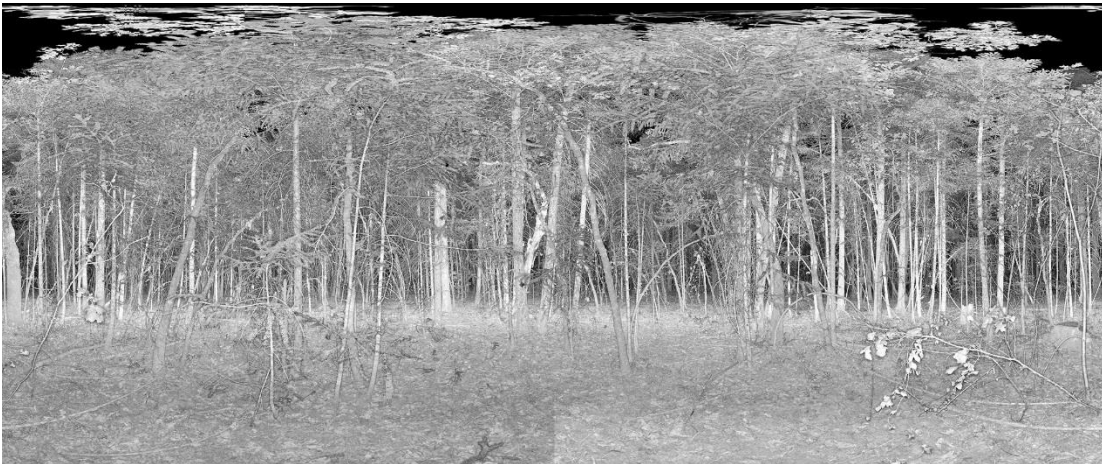

| Scan #/ Plot # / Date / Time  | UTM (NAD 83)        | Aspect / Degree / TT | LiDDI / BA (m <sup>2</sup> /ha) / DBH V (cm) |
|-------------------------------|---------------------|----------------------|----------------------------------------------|
| 005 / FF4 / 09-02-2014 / 1620 | 10T 0448126 4659798 | - / - / 4m 280°      | 2.5 / 38 / 33                                |

| Name             | EcoRegion         | Ecological Systems Description                                               |
|------------------|-------------------|------------------------------------------------------------------------------|
| French Flat (FF) | Klamath Mountains | Mediterranean California Lower Montane Black Oak-Conifer Forest and Woodland |

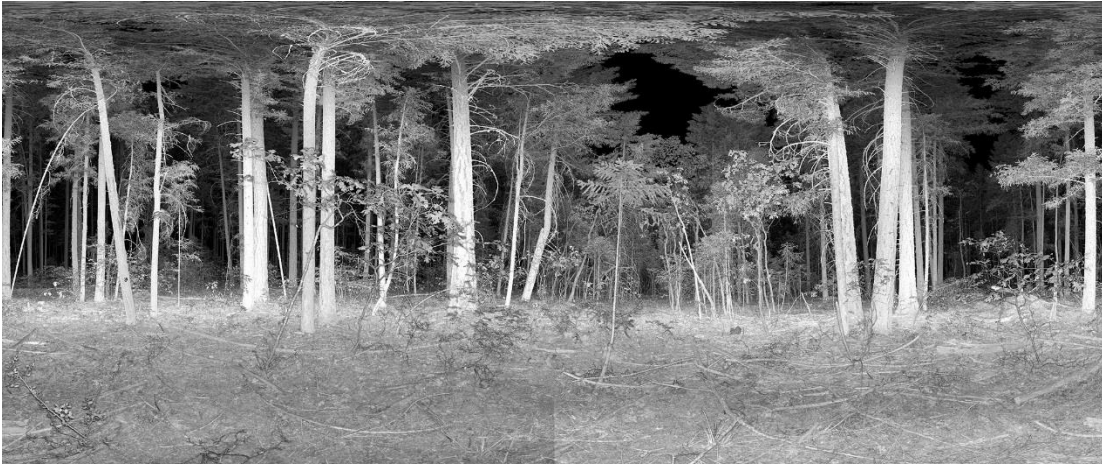

| Scan #/ Plot # / Date / Time  | UTM (NAD 83)        | Aspect / Degree / TT | LiDDI / BA (m <sup>2</sup> /ha) / DBH V (cm) |
|-------------------------------|---------------------|----------------------|----------------------------------------------|
| 006 / FF7 / 09-02-2014 / 1640 | 10T 0448158 4659698 | - / - / 5m 80°       | 3.0 / 84 / 132                               |

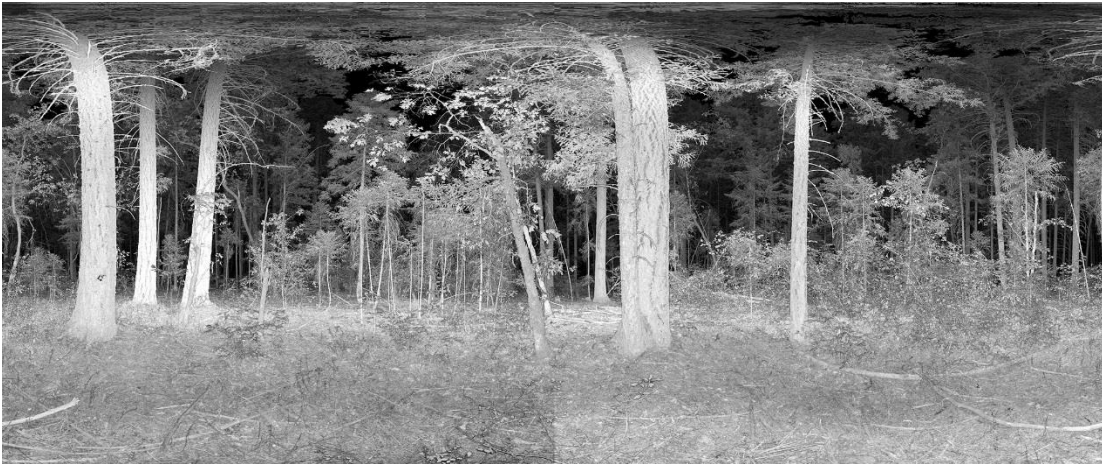

| Scan #/ Plot # / Date / Time  | UTM (NAD 83)        | Aspect / Degree / TT | LiDDI / BA (m <sup>2</sup> /ha) / DBH V (cm) |
|-------------------------------|---------------------|----------------------|----------------------------------------------|
| 007 / FF8 / 09-02-2014 / 1710 | 10T 0448266 4659723 | - / - / 3m 130°      | 4.0 / 52 / 296                               |

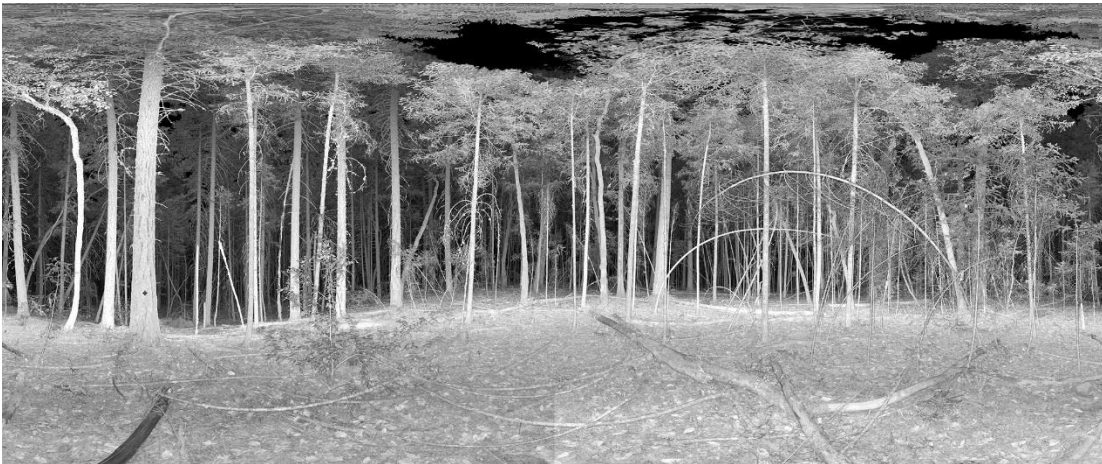

| Scan #/ Plot # / Date / Time  | UTM (NAD 83)        | Aspect / Degree / TT | LiDDI / BA (m <sup>2</sup> /ha) / DBH V (cm) |
|-------------------------------|---------------------|----------------------|----------------------------------------------|
| 008 / FF9 / 09-02-2014 / 1535 | 10T 0448359 4659763 | 90° / 8° / 4m 70°    | 3.0 / 55 / 85                                |

| Name            | EcoRegion         | Ecological Systems Description                                   |
|-----------------|-------------------|------------------------------------------------------------------|
| Grayback Glades | Klamath Mountains | Mediterranean California Mesic Mixed Conifer Forest and Woodland |

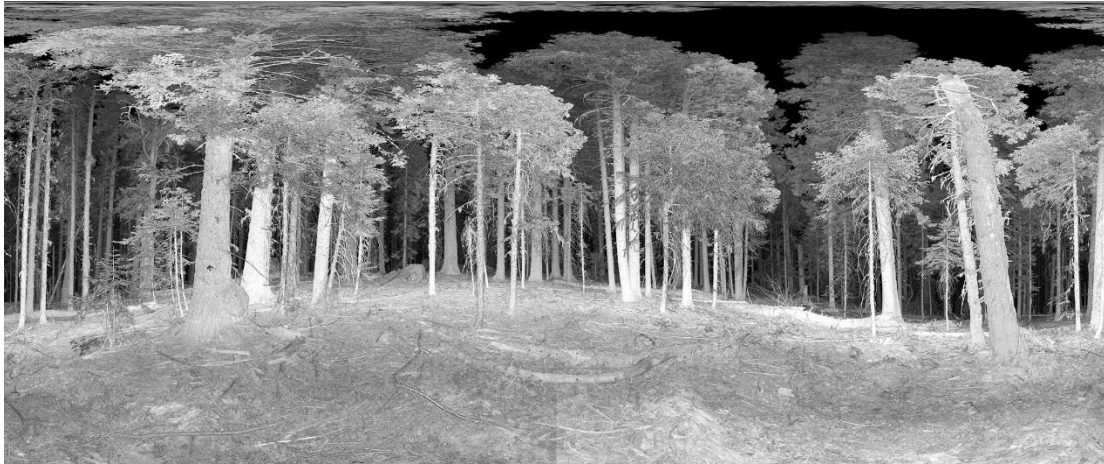

| Scan #/ Plot # / Date / Time  | UTM (NAD 83)        | Aspect / Degree / TT | LiDDI / BA (m <sup>2</sup> /ha) / DBH V (cm) |
|-------------------------------|---------------------|----------------------|----------------------------------------------|
| 000 / GG1 / 08-31-2014 / 1300 | 10T 0473863 4665752 | 280° / 12° / 3m 30°  | 6.0 / 159 / 205                              |

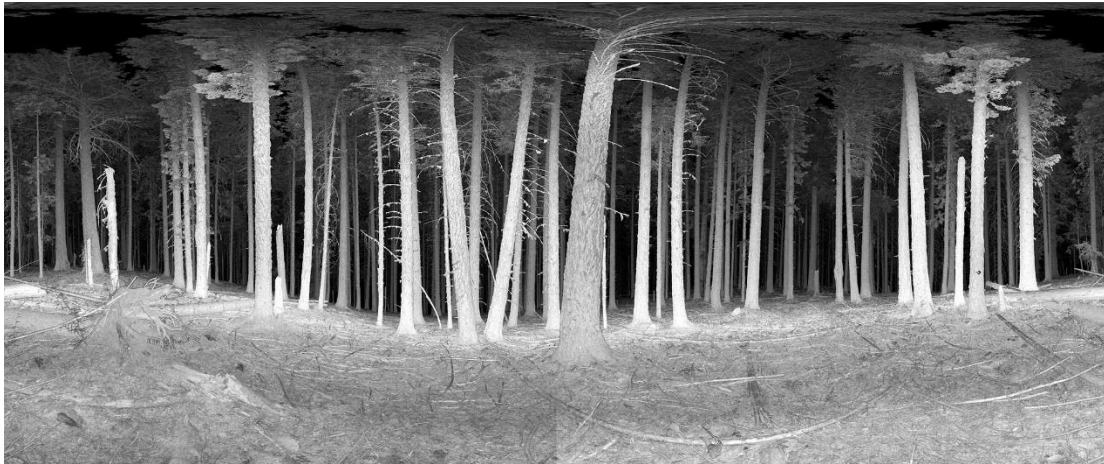

| Scan #/ Plot # / Date / Time  | UTM (NAD 83)        | Aspect / Degree / TT | LiDDI / BA (m <sup>2</sup> /ha) / DBH V (cm) |
|-------------------------------|---------------------|----------------------|----------------------------------------------|
| 001 / GG4 / 08-31-2014 / 1340 | 10T 0473887 4665646 | 310° / 7° / 5m 80°   | 4.9 / 189 / 157                              |

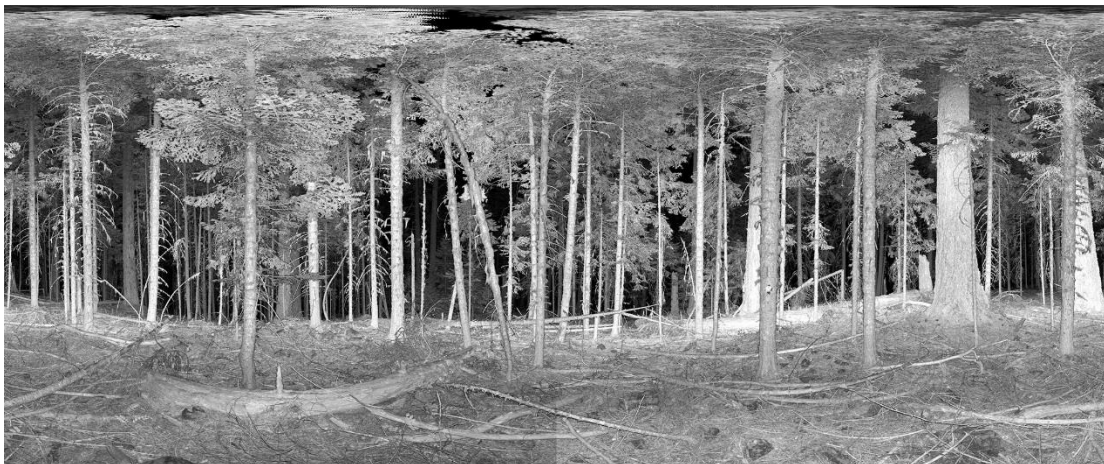

| Scan #/ Plot # / Date / Time  | UTM (NAD 83)        | Aspect / Degree / TT | LiDDI / BA (m <sup>2</sup> /ha) / DBH V (cm) |
|-------------------------------|---------------------|----------------------|----------------------------------------------|
| 002 / GG7 / 08-31-2014 / 1410 | 10T 0473908 4665556 | 360° / 8° / 3m 90°   | 6.0 / 139 / 199                              |

| Name            | EcoRegion         | Ecological Systems Description                                   |
|-----------------|-------------------|------------------------------------------------------------------|
| Grayback Glades | Klamath Mountains | Mediterranean California Mesic Mixed Conifer Forest and Woodland |

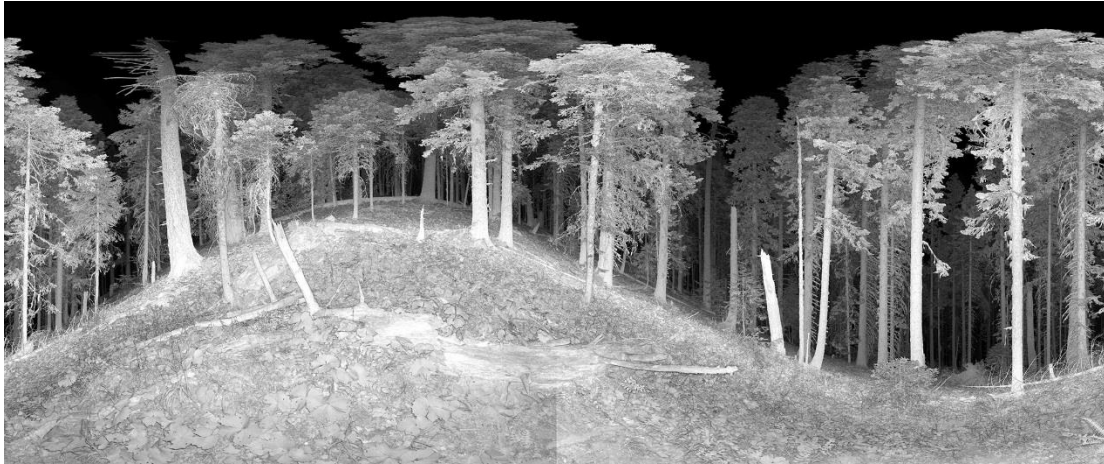

| Scan #/ Plot # / Date / Time  | UTM (NAD 83)        | Aspect / Degree / TT | LiDDI / BA (m <sup>2</sup> /ha) / DBH V (cm) |
|-------------------------------|---------------------|----------------------|----------------------------------------------|
| 003 / GG8 / 08-31-2014 / 1450 | 10T 0474013 4665591 | 84° / 32° / 4m 310°  | 3.6 / 51 / 90                                |

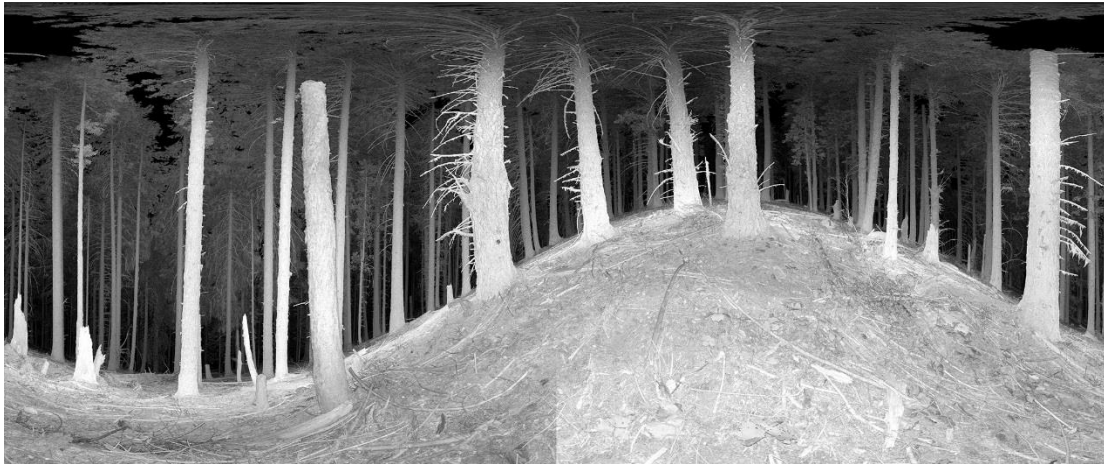

| Scan #/ Plot # / Date / Time  | UTM (NAD 83)        | Aspect / Degree / TT | LiDDI / BA (m <sup>2</sup> /ha) / DBH V (cm) |
|-------------------------------|---------------------|----------------------|----------------------------------------------|
| 004 / GG9 / 08-31-2014 / 1530 | 10T 0474101 4665612 | 80° / 32° / 5m 190°  | 3.0 / 127 / 156                              |

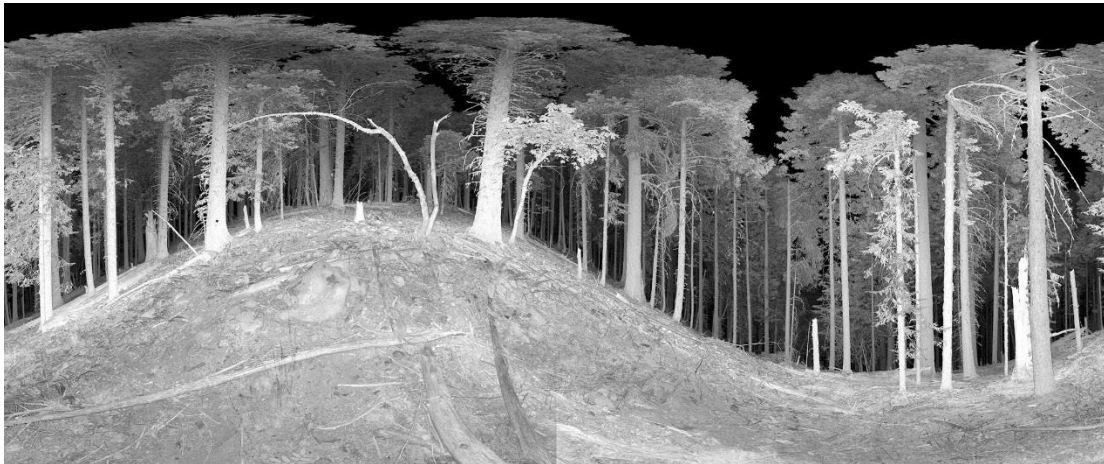

| Scan #/ Plot # / Date / Time  | UTM (NAD 83)        | Aspect / Degree / TT | LiDDI / BA (m <sup>2</sup> /ha) / DBH V (cm) |
|-------------------------------|---------------------|----------------------|----------------------------------------------|
| 005 / GG6 / 08-31-2014 / 1630 | 10T 0474078 4665711 | 80° / 29° / 7m 20°   | 6.0 / 132 / 266                              |

| Name            | EcoRegion         | Ecological Systems Description                                   |
|-----------------|-------------------|------------------------------------------------------------------|
| Grayback Glades | Klamath Mountains | Mediterranean California Mesic Mixed Conifer Forest and Woodland |

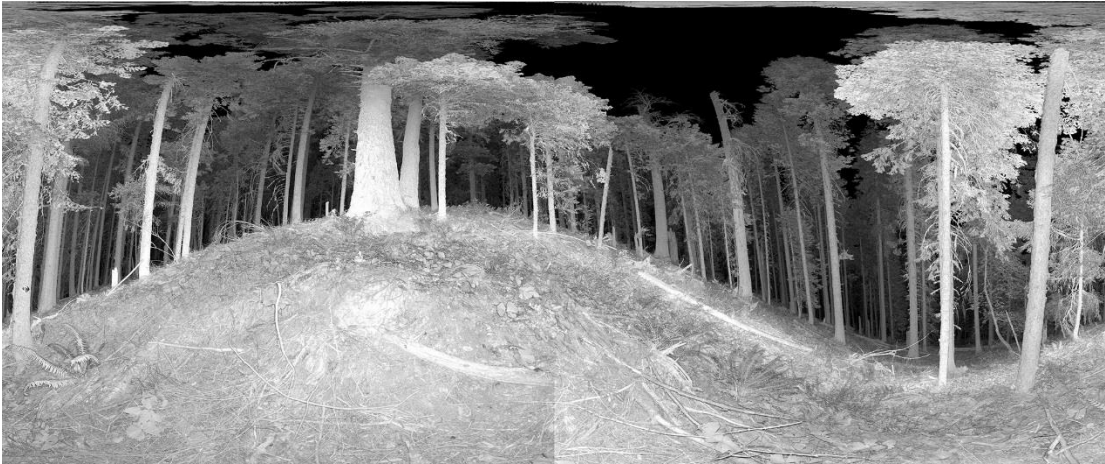

| Scan #/ Plot # / Date / Time  | UTM (NAD 83)        | Aspect / Degree / TT | LiDDI / BA (m <sup>2</sup> /ha) / DBH V (cm) |
|-------------------------------|---------------------|----------------------|----------------------------------------------|
| 007 / GG3 / 08-31-2014 / 1700 | 10T 0474055 4665822 | 60° / 34° / 3m 140°  | 5.7 / 89 / 320                               |

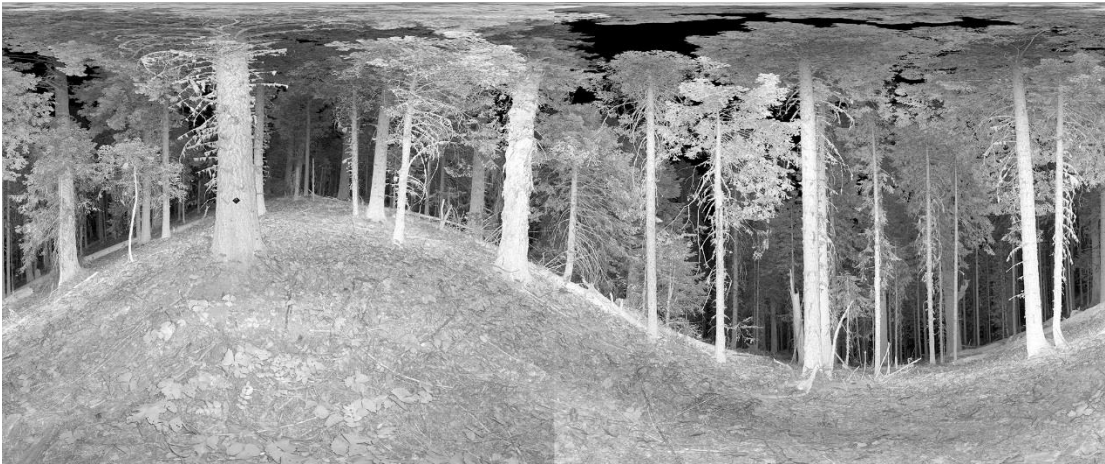

| Scan #/ Plot # / Date / Time  | UTM (NAD 83)        | Aspect / Degree / TT | LiDDI / BA (m <sup>2</sup> /ha) / DBH V (cm) |
|-------------------------------|---------------------|----------------------|----------------------------------------------|
| 009 / GG5 / 08-31-2014 / 1750 | 10T 0473971 4665686 | 90° / 26° / 3m 230°  | 4.9 / 109 / 286                              |

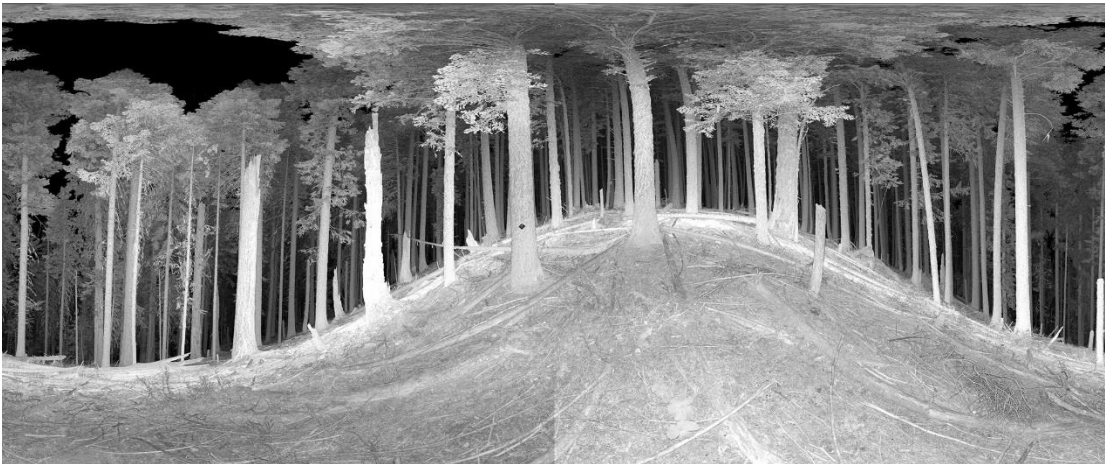

| Scan #/ Plot # / Date / Time  | UTM (NAD 83)        | Aspect / Degree / TT | LiDDI / BA (m <sup>2</sup> /ha) / DBH V (cm) |
|-------------------------------|---------------------|----------------------|----------------------------------------------|
| 010 / GG2 / 08-31-2014 / 1825 | 10T 0473965 4665805 | 80° / 28° / 4m 220°  | 4.9 / 161 / 170                              |

| Name            | EcoRegion     | Ecological Systems Description        |
|-----------------|---------------|---------------------------------------|
| Goat Marsh (GM) | West Cascades | North Pacific Wooded Volcanic Flowage |

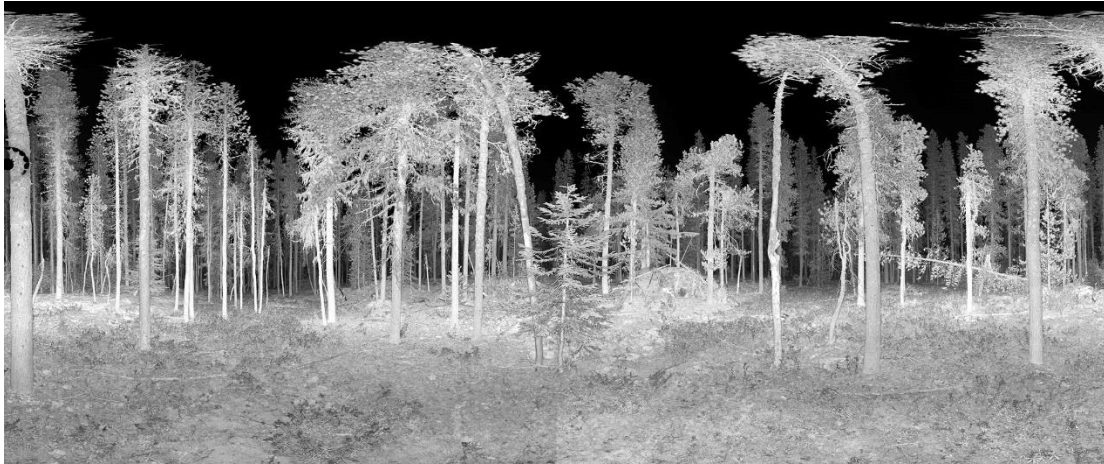

| Scan #/ Plot # / Date / Time  | UTM (NAD 83)        | Aspect / Degree / TT | LiDDI / BA (m <sup>2</sup> /ha) / DBH V (cm) |
|-------------------------------|---------------------|----------------------|----------------------------------------------|
| 000 / GM6 / 10-02-2014 / 1130 | 10T 0556511 5111923 | - / - / 2m 155°      | 1.4 / 26 / 14                                |

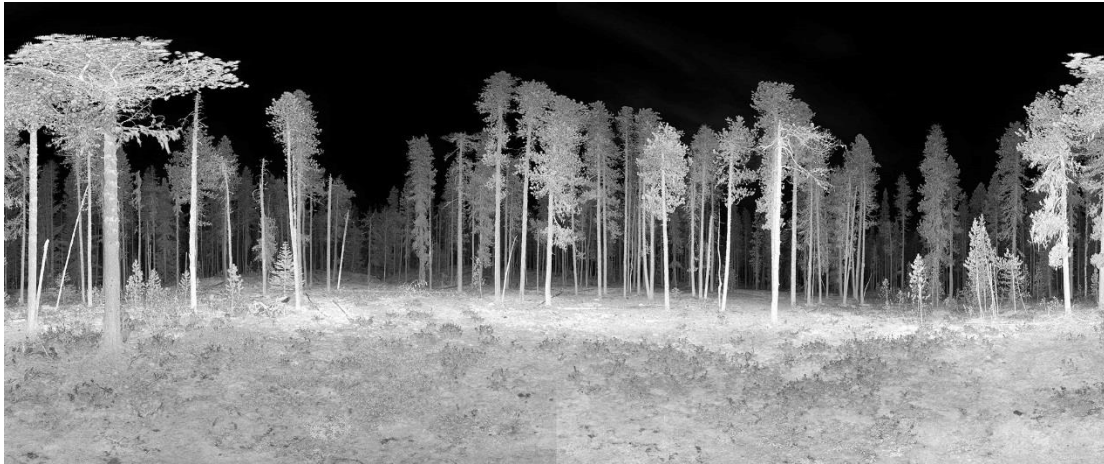

| Scan #/ Plot # / Date / Time  | UTM (NAD 83)        | Aspect / Degree / TT | LiDDI / BA (m <sup>2</sup> /ha) / DBH V (cm) |
|-------------------------------|---------------------|----------------------|----------------------------------------------|
| 001 / GM3 / 10-02-2014 / 1210 | 10T 0556483 5112020 | 210° / 4° / 3m 325°  | 2.2 / 28 / 13                                |

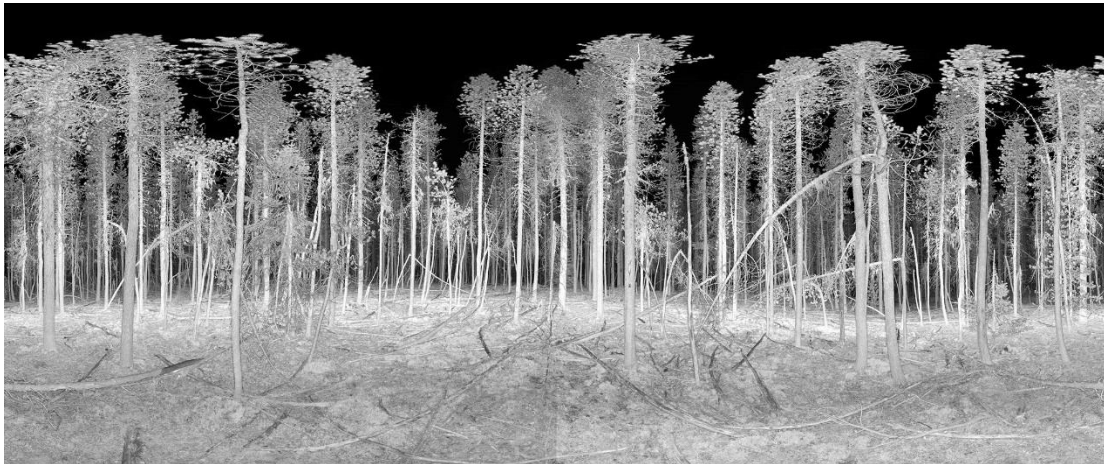

| Scan #/ Plot # / Date / Time  | UTM (NAD 83)        | Aspect / Degree / TT | LiDDI / BA (m <sup>2</sup> /ha) / DBH V (cm) |
|-------------------------------|---------------------|----------------------|----------------------------------------------|
| 002 / GM5 / 10-02-2014 / 1240 | 10T 0556419 5111887 | 230° / 5° / 2m 170°  | 1.4 / 36 / 8                                 |

| Name            | EcoRegion     | Ecological Systems Description        |
|-----------------|---------------|---------------------------------------|
| Goat Marsh (GM) | West Cascades | North Pacific Wooded Volcanic Flowage |

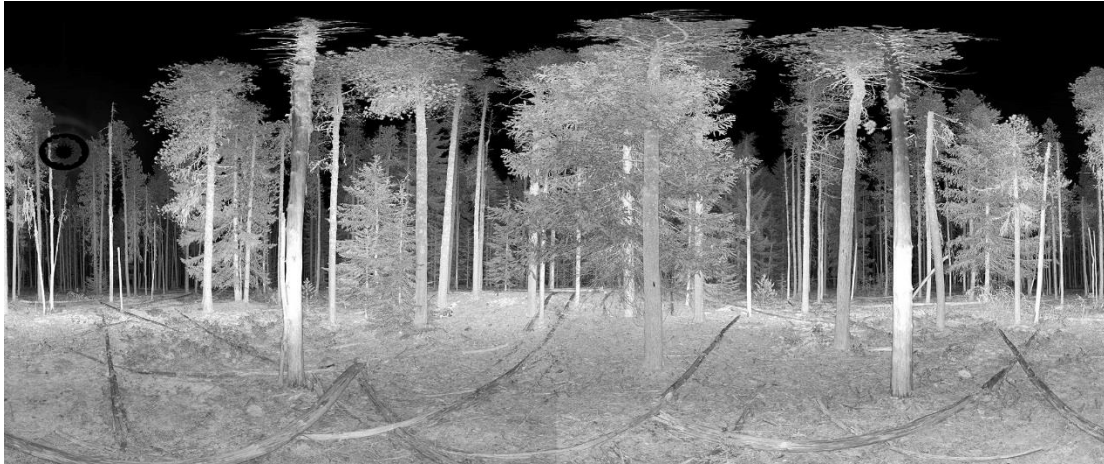

| Scan #/ Plot # / Date / Time  | UTM (NAD 83)        | Aspect / Degree / TT | LiDDI / BA (m <sup>2</sup> /ha) / DBH V (cm) |
|-------------------------------|---------------------|----------------------|----------------------------------------------|
| 003 / GM2 / 10-02-2014 / 1305 | 10T 0556387 5111984 | - / - / 2m 20°       | 1.4 / 35 / 15                                |

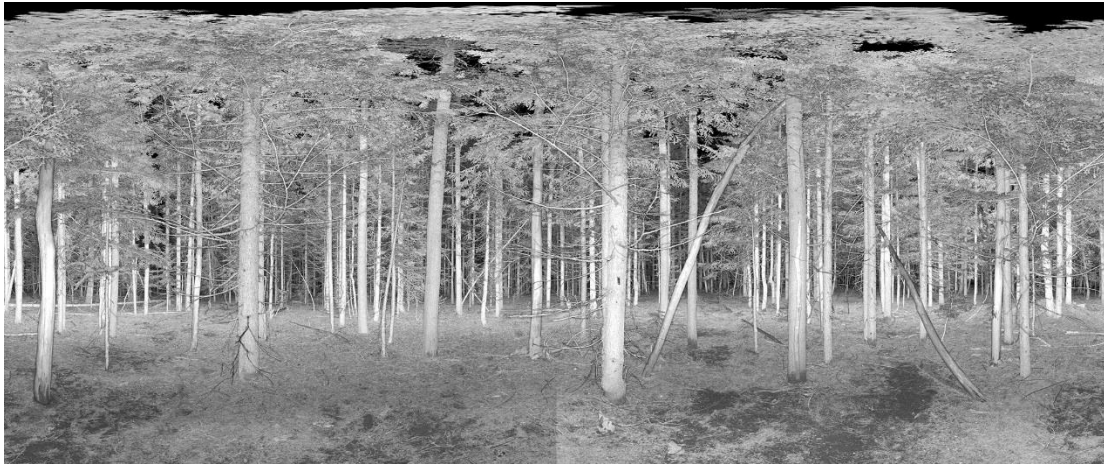

| Scan #/ Plot # / Date / Time  | UTM (NAD 83)        | Aspect / Degree / TT | LiDDI / BA (m <sup>2</sup> /ha) / DBH V (cm) |
|-------------------------------|---------------------|----------------------|----------------------------------------------|
| 004 / GM1 / 10-02-2014 / 1330 | 10T 0556287 5111954 | - / - / 2m 340°      | 1.8 / 59 / 13                                |

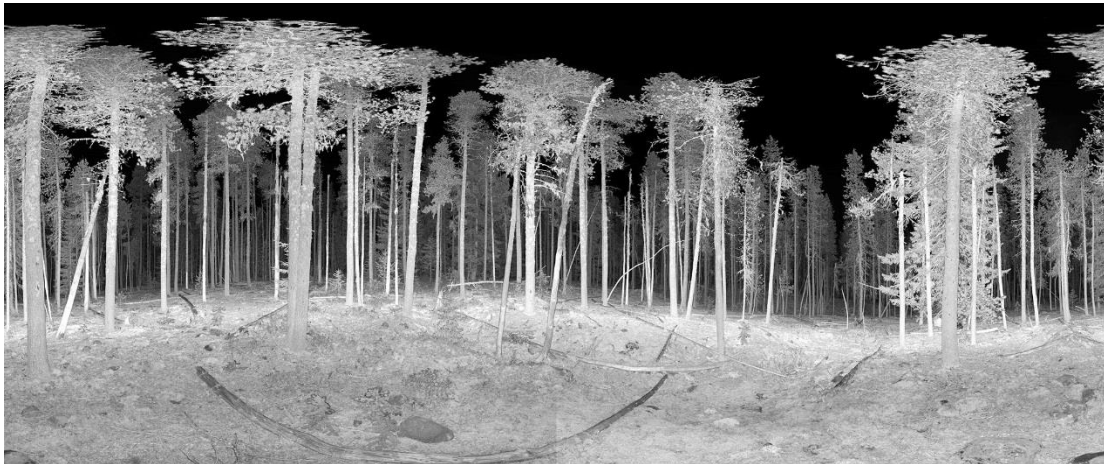

| Scan #/ Plot # / Date / Time  | UTM (NAD 83)        | Aspect / Degree / TT | LiDDI / BA (m <sup>2</sup> /ha) / DBH V (cm) |
|-------------------------------|---------------------|----------------------|----------------------------------------------|
| 005 / GM4 / 10-02-2014 / 1400 | 10T 0556318 5111860 | 170° / 11° / 3m 235° | 1.3 / 41 / 14                                |

| Name            | EcoRegion     | Ecological Systems Description        |
|-----------------|---------------|---------------------------------------|
| Goat Marsh (GM) | West Cascades | North Pacific Wooded Volcanic Flowage |

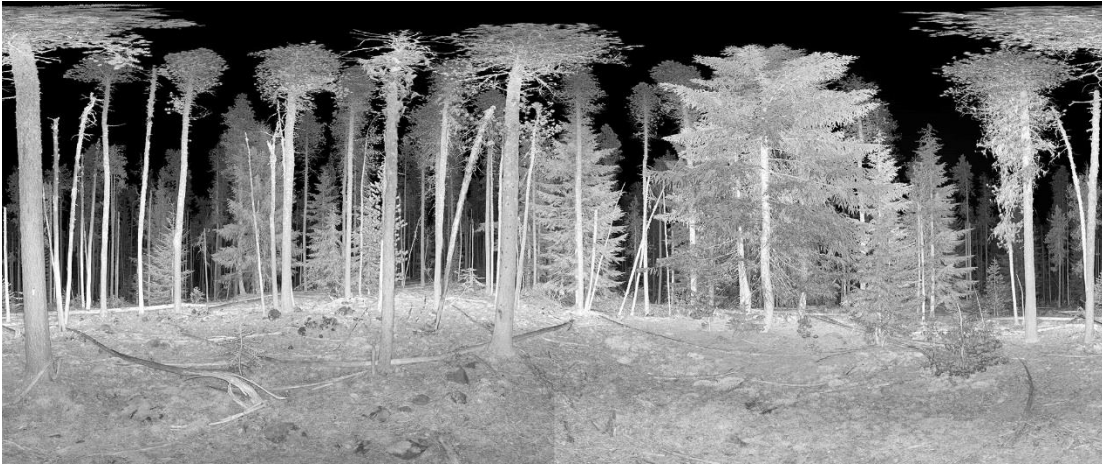

| Scan #/ Plot # / Date / Time  | UTM (NAD 83)        | Aspect / Degree / TT | LiDDI / BA (m <sup>2</sup> /ha) / DBH V (cm) |
|-------------------------------|---------------------|----------------------|----------------------------------------------|
| 006 / GM7 / 10-02-2014 / 1450 | 10T 0556351 5111762 | 195° / 9° / 2m 285°  | 1.4 / 26 / 12                                |

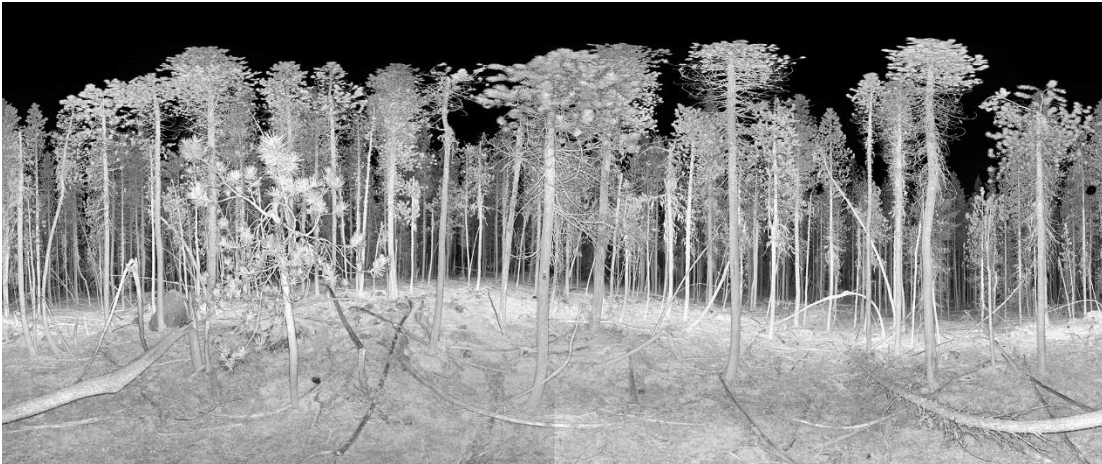

| Scan #/ Plot # / Date / Time  | UTM (NAD 83)        | Aspect / Degree / TT | LiDDI / BA (m <sup>2</sup> /ha) / DBH V (cm) |
|-------------------------------|---------------------|----------------------|----------------------------------------------|
| 007 / GM8 / 10-02-2014 / 1520 | 10T 0556451 5111793 | 195° / 5° / 2m 50°   | 1.4 / 28 / 6                                 |

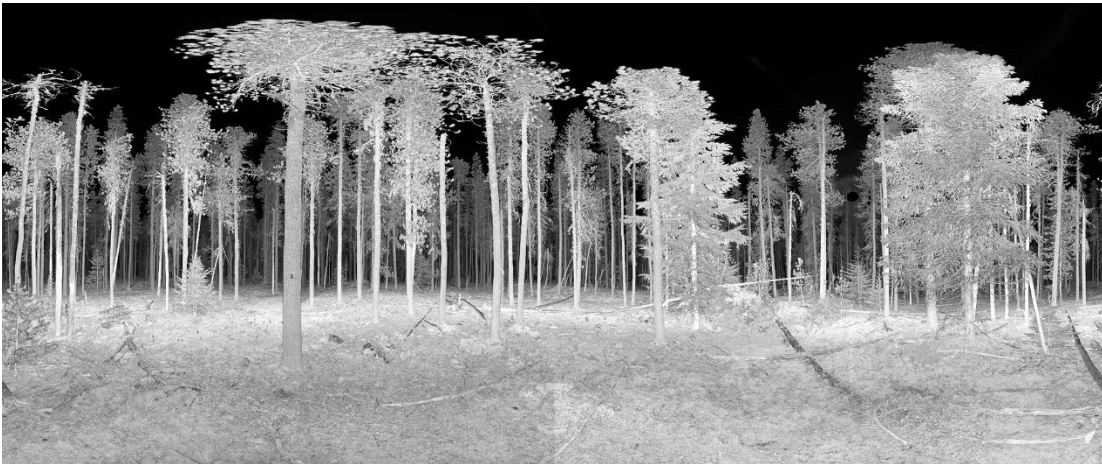

| Scan #/ Plot # / Date / Time  | UTM (NAD 83)        | Aspect / Degree / TT | LiDDI / BA (m <sup>2</sup> /ha) / DBH V (cm) |
|-------------------------------|---------------------|----------------------|----------------------------------------------|
| 008 / GM9 / 10-02-2014 / 1600 | 10T 0556544 5111823 | - / - / 2m 40°       | 1.3 / 34 / 9                                 |

| Name                  | EcoRegion         | Ecological Systems Description                                   |
|-----------------------|-------------------|------------------------------------------------------------------|
| Hunter Creek Bog (HC) | Klamath Mountains | Klamath-Siskiyou Upper Montane Serpentine Mixed Conifer Woodland |

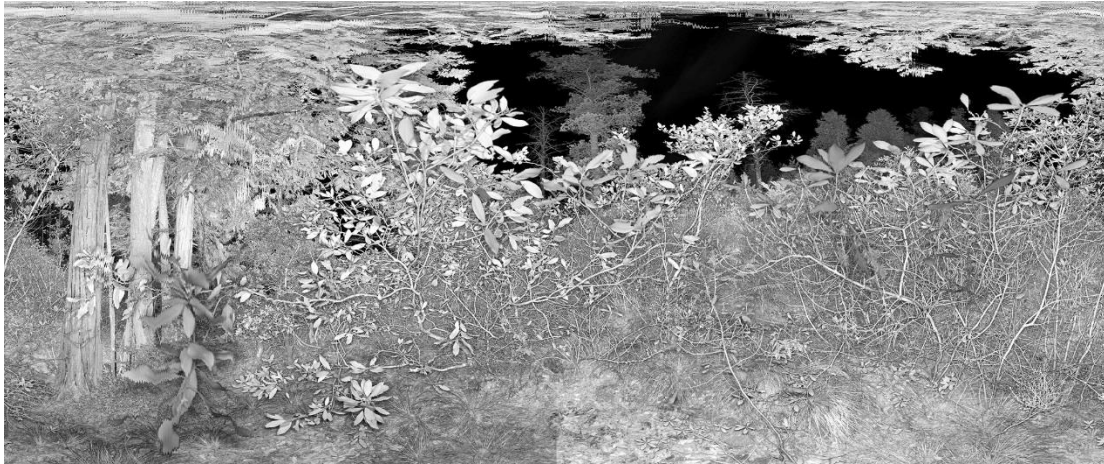

| Scan #/ Plot # / Date / Time  | UTM (NAD 83)        | Aspect / Degree / TT | LiDDI / BA (m <sup>2</sup> /ha) / DBH V (cm) |
|-------------------------------|---------------------|----------------------|----------------------------------------------|
| 000 / HC1 / 09-27-2014 / 1430 | 10T 0391894 4690870 | 265° / 23° / 4m 205° | 2.2 / 19 / 198                               |

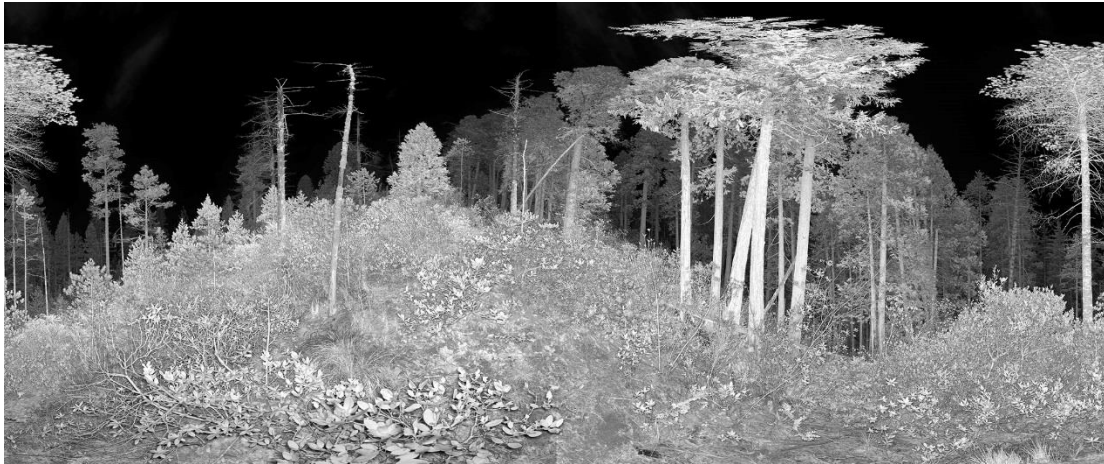

| Scan #/ Plot # / Date / Time  | UTM (NAD 83)        | Aspect / Degree / TT | LiDDI / BA (m <sup>2</sup> /ha) / DBH V (cm) |
|-------------------------------|---------------------|----------------------|----------------------------------------------|
| 001 / HC4 / 09-27-2014 / 1510 | 10T 0391917 4690777 | 275° / 25° / 5m 320° | 3.0 / 44 / 84                                |

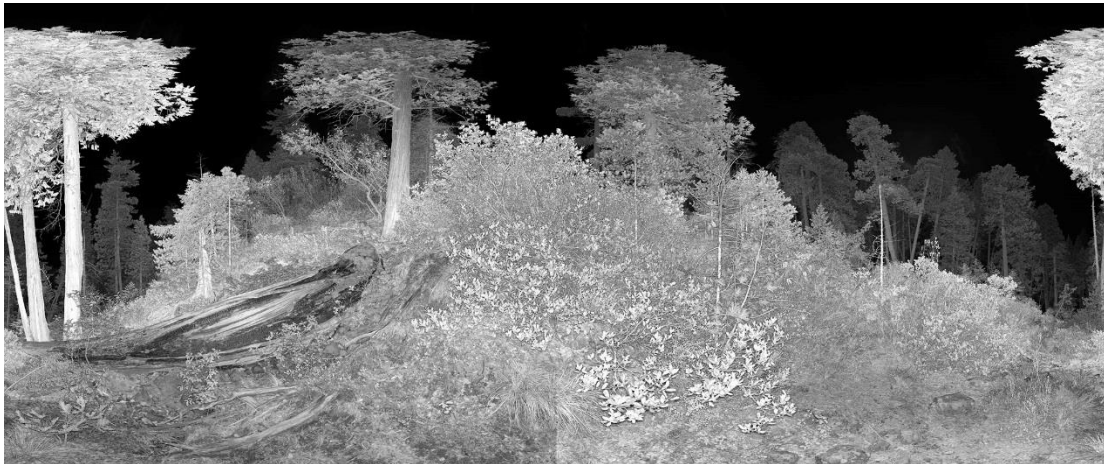

| Scan #/ Plot # / Date / Time  | UTM (NAD 83)        | Aspect / Degree / TT | LiDDI / BA (m <sup>2</sup> /ha) / DBH V (cm) |
|-------------------------------|---------------------|----------------------|----------------------------------------------|
| 002 / HC7 / 09-27-2014 / 1545 | 10T 0391928 4690682 | 280° / 24° / 6m 335° | 3.6 / 32 / 392                               |

| Name                  | EcoRegion         | Ecological Systems Description                                   |
|-----------------------|-------------------|------------------------------------------------------------------|
| Hunter Creek Bog (HC) | Klamath Mountains | Klamath-Siskiyou Upper Montane Serpentine Mixed Conifer Woodland |

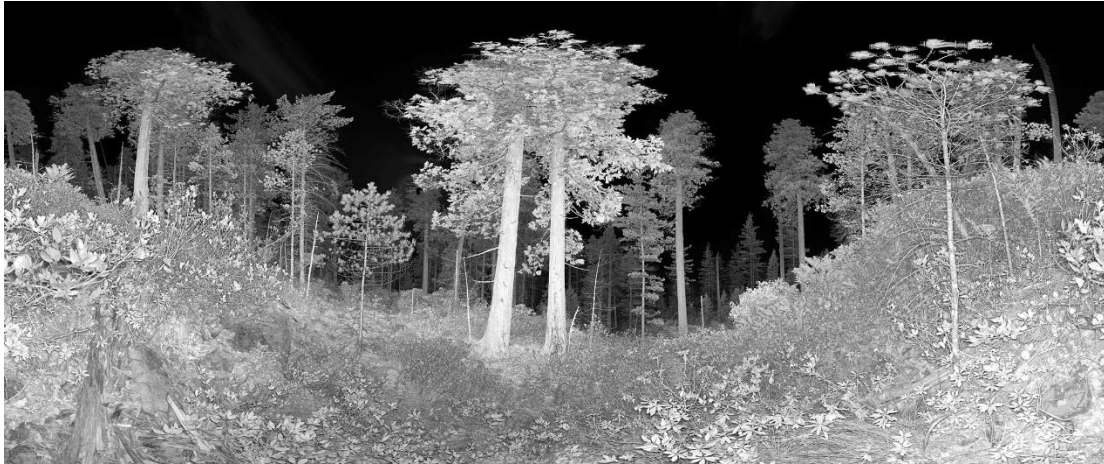

| Scan #/ Plot # / Date / Time  | UTM (NAD 83)        | Aspect / Degree / TT | LiDDI / BA (m <sup>2</sup> /ha) / DBH V (cm) |
|-------------------------------|---------------------|----------------------|----------------------------------------------|
| 003 / HC8 / 09-27-2014 / 1615 | 10T 0392033 4690693 | 275° / 9° / 7m 255°  | 3.0 / 28 / 172                               |

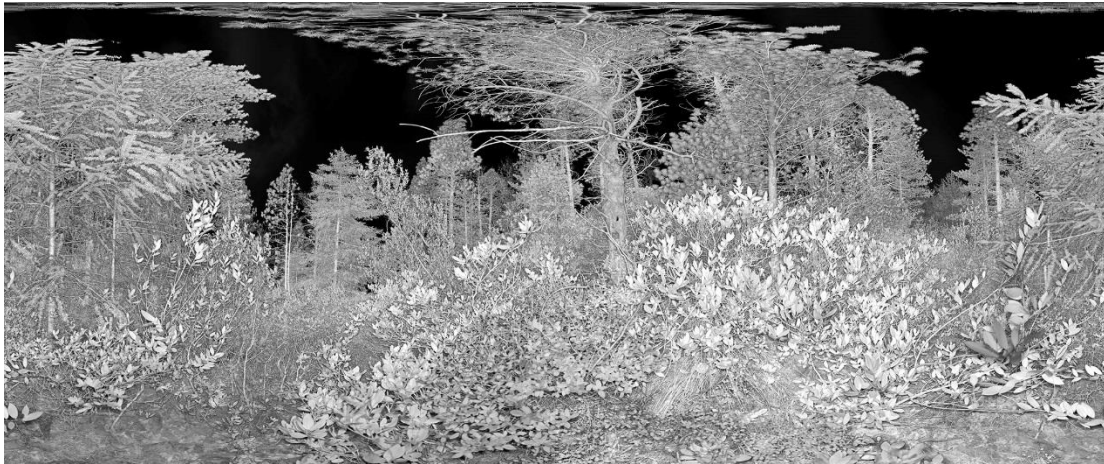

| Scan #/ Plot # / Date / Time  | UTM (NAD 83)        | Aspect / Degree / TT | LiDDI / BA (m <sup>2</sup> /ha) / DBH V (cm) |
|-------------------------------|---------------------|----------------------|----------------------------------------------|
| 004 / HC9 / 09-27-2014 / 1650 | 10T 0392138 4690725 | 320° / 12° / 3m 15°  | 0.6 / 2 / -                                  |

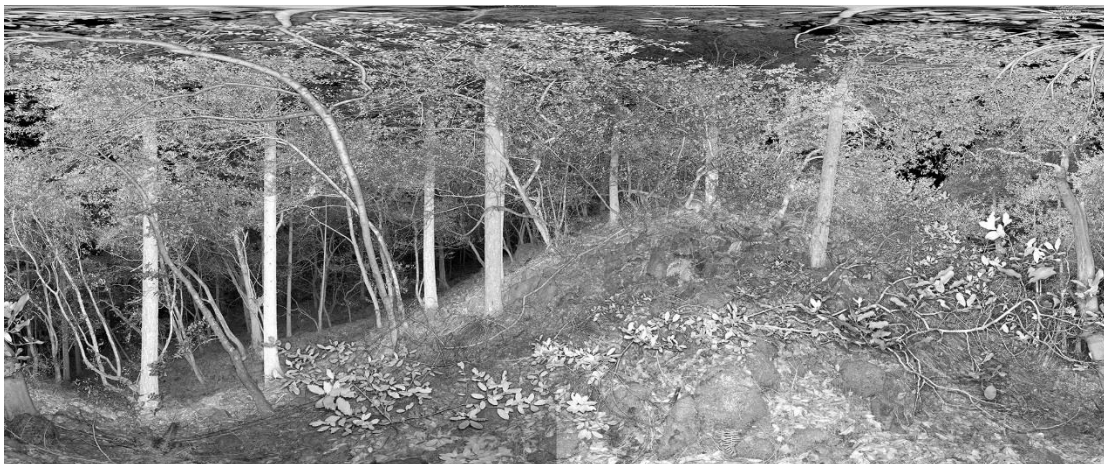

| Scan #/ Plot # / Date / Time  | UTM (NAD 83)        | Aspect / Degree / TT | LiDDI / BA (m <sup>2</sup> /ha) / DBH V (cm) |
|-------------------------------|---------------------|----------------------|----------------------------------------------|
| 005 / HC6 / 09-27-2014 / 1730 | 10T 0392113 4690820 | 10° / 28° / 2m 285°  | 3.0 / 63 / 60                                |

| Name                  | EcoRegion         | Ecological Systems Description                                   |
|-----------------------|-------------------|------------------------------------------------------------------|
| Hunter Creek Bog (HC) | Klamath Mountains | Klamath-Siskiyou Upper Montane Serpentine Mixed Conifer Woodland |

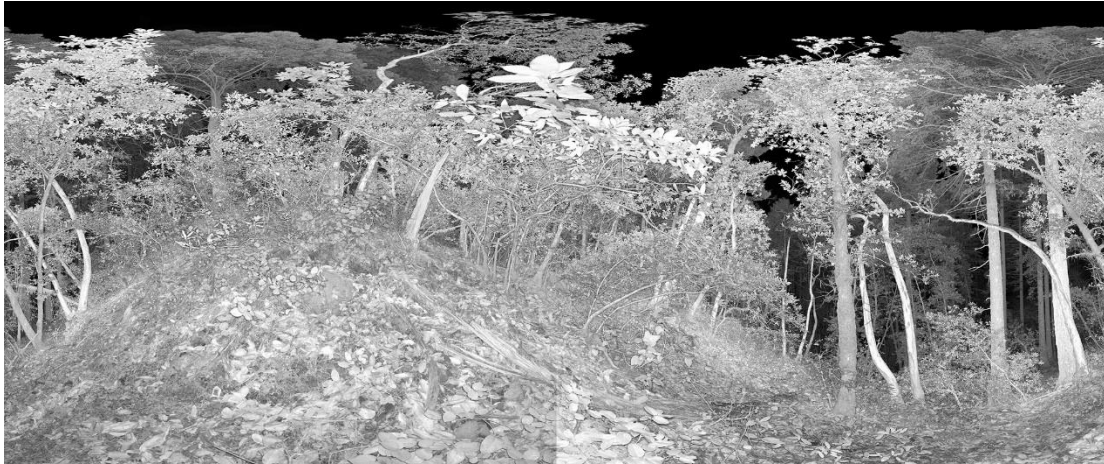

| Scan #/ Plot # / Date / Time  | UTM (NAD 83)        | Aspect / Degree / TT | LiDDI / BA (m <sup>2</sup> /ha) / DBH V (cm) |
|-------------------------------|---------------------|----------------------|----------------------------------------------|
| 006 / HC3 / 09-27-2014 / 1800 | 10T 0392092 4690918 | 360° / 34° / 4m 325° | 2.6 / 26 / 82                                |

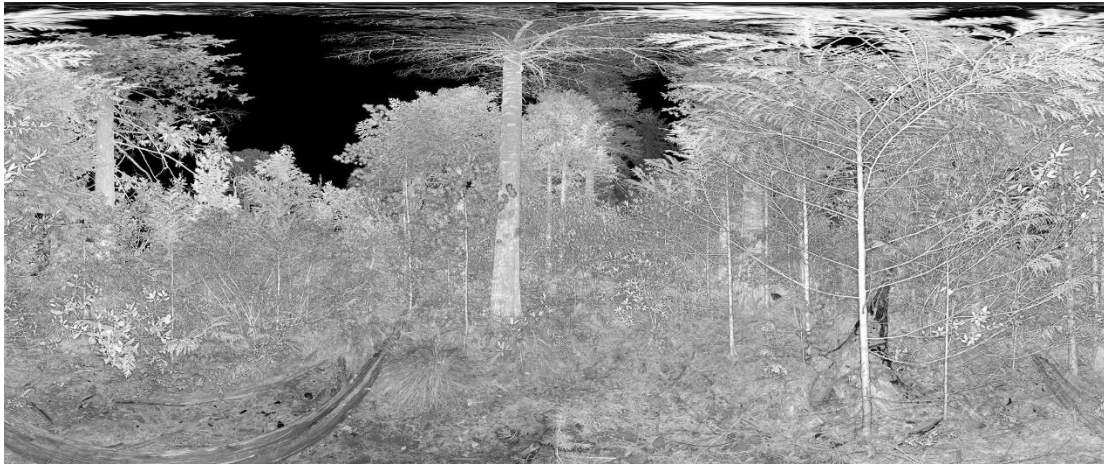

| Scan #/ Plot # / Date / Time  | UTM (NAD 83)        | Aspect / Degree / TT | LiDDI / BA (m <sup>2</sup> /ha) / DBH V (cm) |
|-------------------------------|---------------------|----------------------|----------------------------------------------|
| 007 / HC5 / 09-27-2014 / 1840 | 10T 0392015 4690807 | 290° / 14° / 3m 260° | 1.4 / 5 / 23                                 |

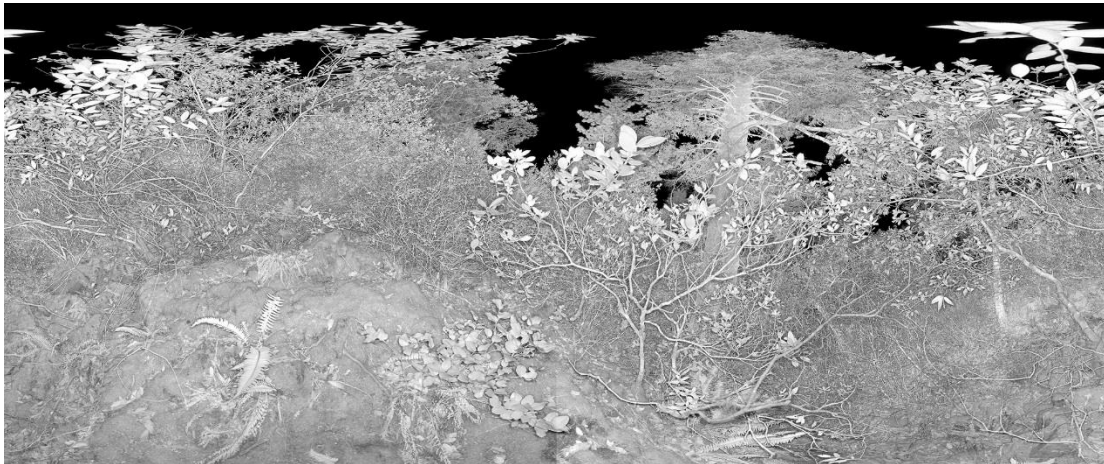

| Scan #/ Plot # / Date / Time  | UTM (NAD 83)        | Aspect / Degree / TT | LiDDI / BA (m <sup>2</sup> /ha) / DBH V (cm) |
|-------------------------------|---------------------|----------------------|----------------------------------------------|
| 008 / HC2 / 09-27-2014 / 1920 | 10T 0391980 4690887 | 350° / 35° / 4m 290° | 1.3 / 10 / -                                 |

| Name              | EcoRegion     | Ecological Systems Description        |
|-------------------|---------------|---------------------------------------|
| Katsuk Butte (KB) | West Cascades | North Pacific Mountain Hemlock Forest |

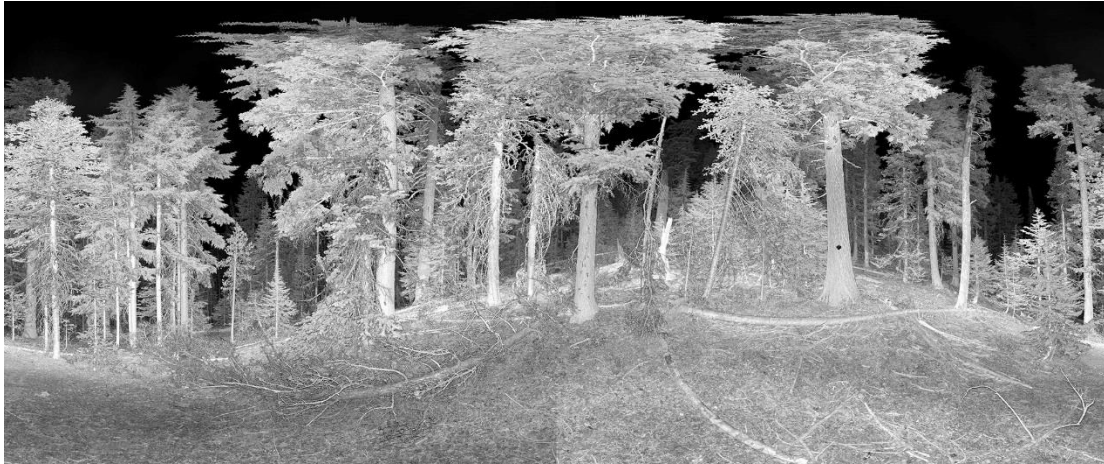

| Scan #/ Plot # / Date / Time | UTM (NAD 83)        | Aspect / Degree / TT | LiDDI / BA (m <sup>2</sup> /ha) / DBH V (cm) |
|------------------------------|---------------------|----------------------|----------------------------------------------|
| 000 / KB1 / 8-21-2014 / 1400 | 10T 0599013 4874500 | 205° / 15° / 4m E°   | 3.0 / 47 / 70                                |

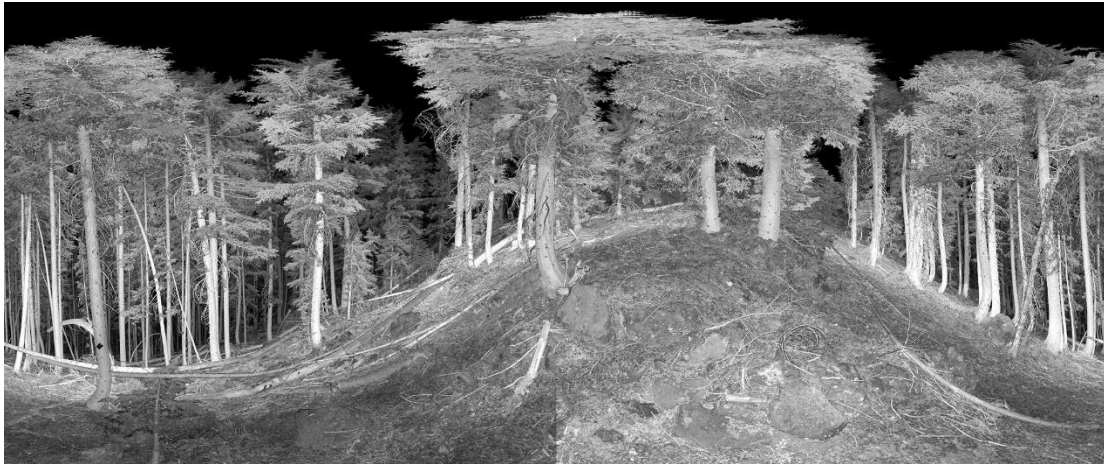

| Scan #/ Plot # / Date / Time | UTM (NAD 83)        | Aspect / Degree / TT | LiDDI / BA (m <sup>2</sup> /ha) / DBH V (cm) |
|------------------------------|---------------------|----------------------|----------------------------------------------|
| 001 / KB2 / 8-21-2014 / 1430 | 10T 0599109 4874514 | 260° / 27° / 3m SW°  | 3.0 / 62 / 28                                |

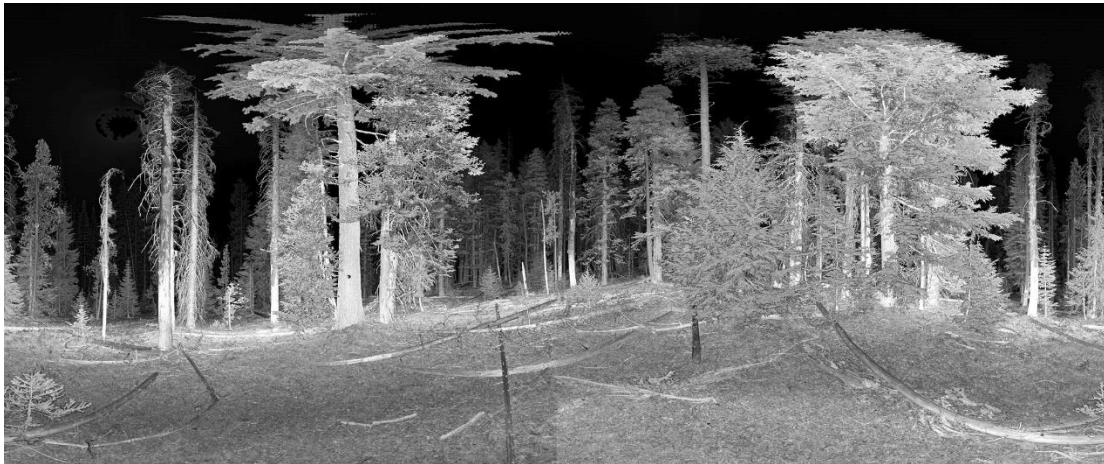

| Scan #/ Plot # / Date / Time | UTM (NAD 83)        | Aspect / Degree / TT | LiDDI / BA (m <sup>2</sup> /ha) / DBH V (cm) |
|------------------------------|---------------------|----------------------|----------------------------------------------|
| 002 / KB3 / 8-21-2014 / 1500 | 10T 0599219 4874549 | 218° / 4° / 3m NW°   | 3.0 / 29 / 42                                |

| Name              | EcoRegion     | Ecological Systems Description        |
|-------------------|---------------|---------------------------------------|
| Katsuk Butte (KB) | West Cascades | North Pacific Mountain Hemlock Forest |

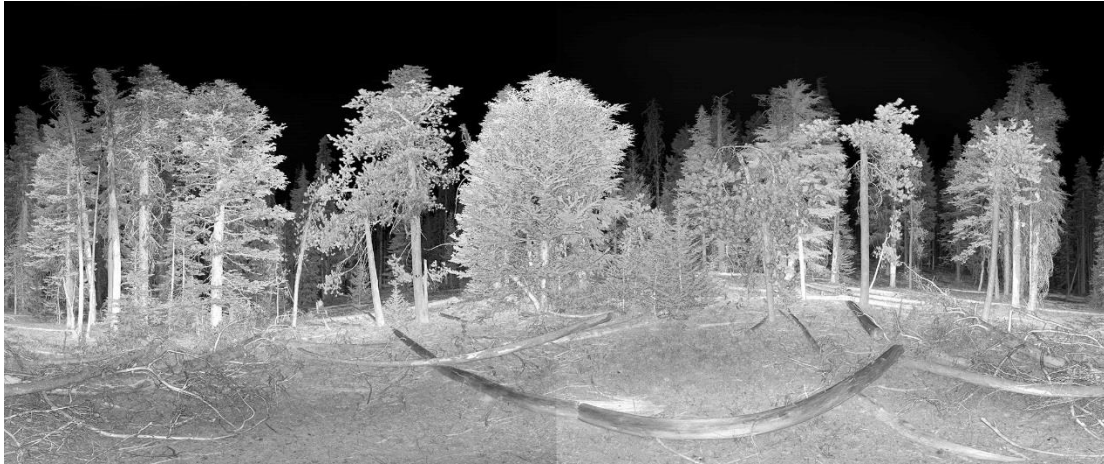

| Scan #/ Plot # / Date / Time | UTM (NAD 83)        | Aspect / Degree / TT | LiDDI / BA (m <sup>2</sup> /ha) / DBH V (cm) |
|------------------------------|---------------------|----------------------|----------------------------------------------|
| 004 / KB6 / 8-21-2014 / 1540 | 10T 0599224 4874444 | 220° / 5° / 6m 300°  | 3.0 / 32 / 53                                |

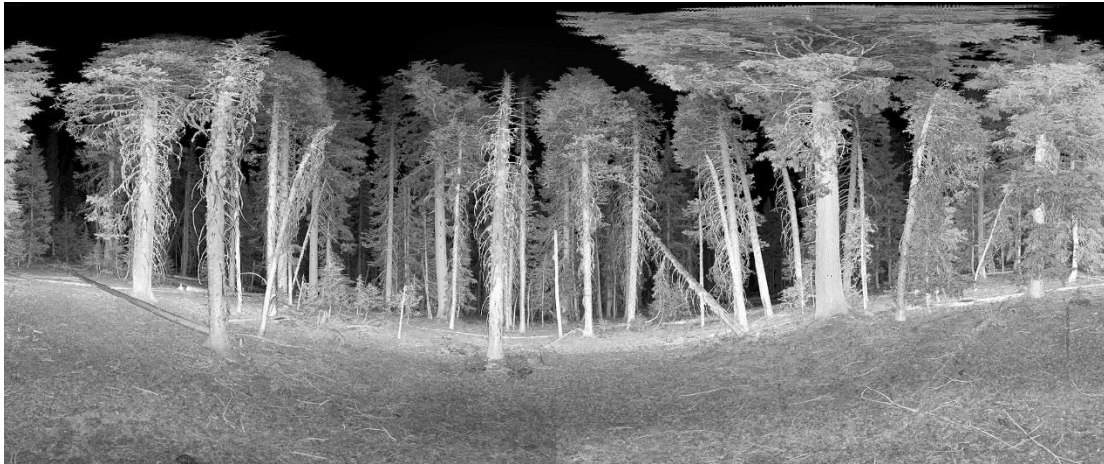

| Scan #/ Plot # / Date / Time | UTM (NAD 83)        | Aspect / Degree / TT | LiDDI / BA (m <sup>2</sup> /ha) / DBH V (cm) |
|------------------------------|---------------------|----------------------|----------------------------------------------|
| 005 / KB9 / 8-21-2014 / 1615 | 10T 0599263 4874346 | 180° / 4° / 5m 320°  | 3.0 / 64 / 100                               |

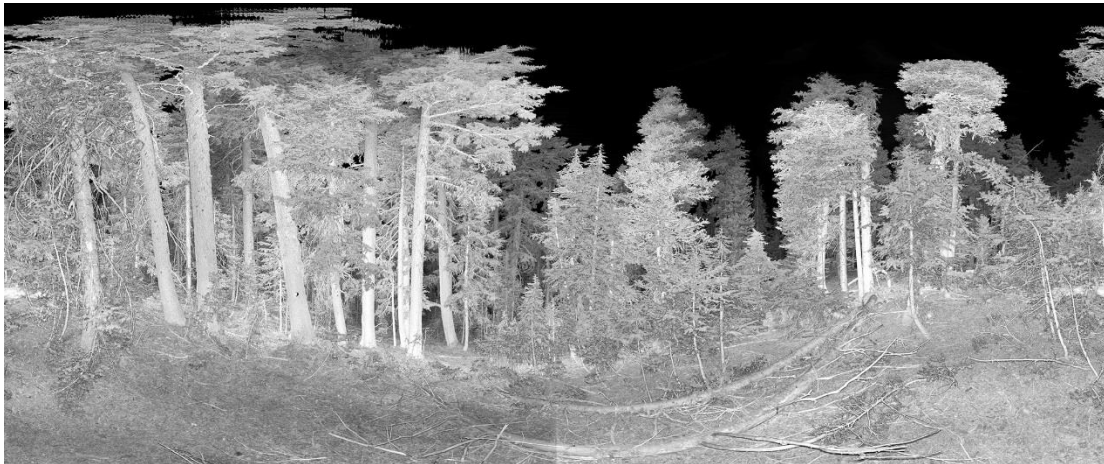

| Scan #/ Plot # / Date / Time | UTM (NAD 83)        | Aspect / Degree / TT | LiDDI / BA (m <sup>2</sup> /ha) / DBH V (cm) |
|------------------------------|---------------------|----------------------|----------------------------------------------|
| 006 / KB8 / 8-21-2014 / 1650 | 10T 0599153 4874329 | 270° / 12° / 4m 360° | 3.0 / 52 / 79                                |

| Name              | EcoRegion     | Ecological Systems Description        |
|-------------------|---------------|---------------------------------------|
| Katsuk Butte (KB) | West Cascades | North Pacific Mountain Hemlock Forest |

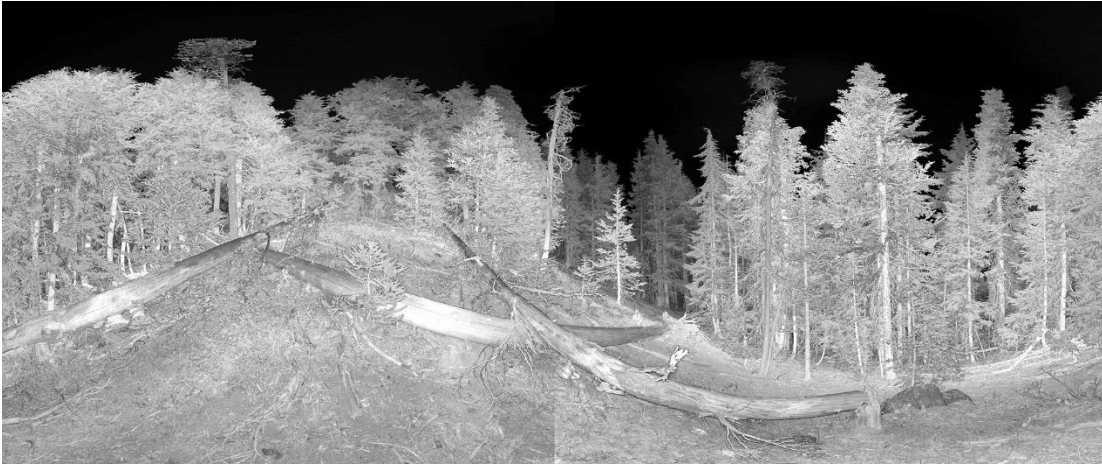

| Scan #/ Plot # / Date / Time | UTM (NAD 83)        | Aspect / Degree / TT | LiDDI / BA (m <sup>2</sup> /ha) / DBH V (cm) |
|------------------------------|---------------------|----------------------|----------------------------------------------|
| 007 / KB5 / 8-21-2014 / 1725 | 10T 0599131 4874422 | 270° / 20° / 7m 260° | 2.3 / 15 / 28                                |

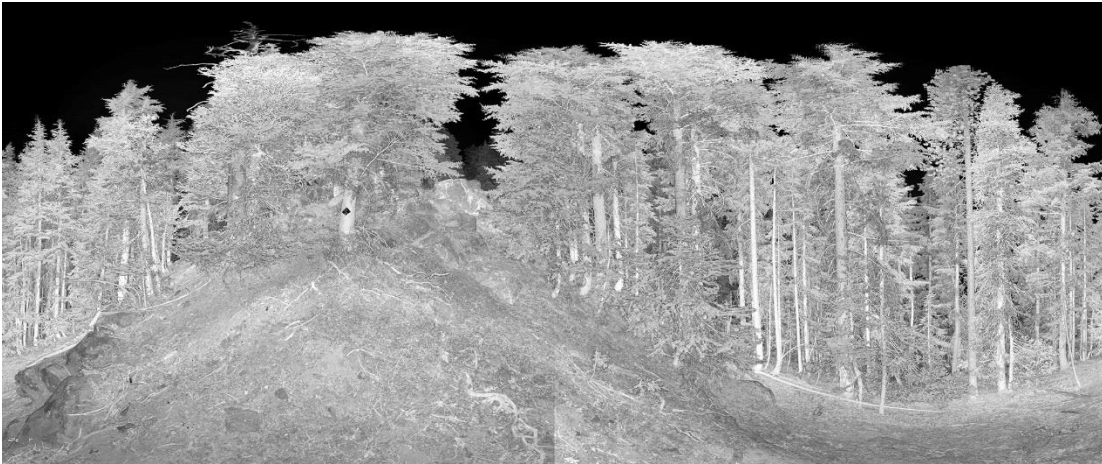

| Scan #/ Plot # / Date / Time | UTM (NAD 83)        | Aspect / Degree / TT | LiDDI / BA (m <sup>2</sup> /ha) / DBH V (cm) |
|------------------------------|---------------------|----------------------|----------------------------------------------|
| 008 / KB7 / 8-21-2014 / 1800 | 10T 0599073 4874284 | 270° / 28° / 3m 80°  | 1.9 / 19 / 25                                |

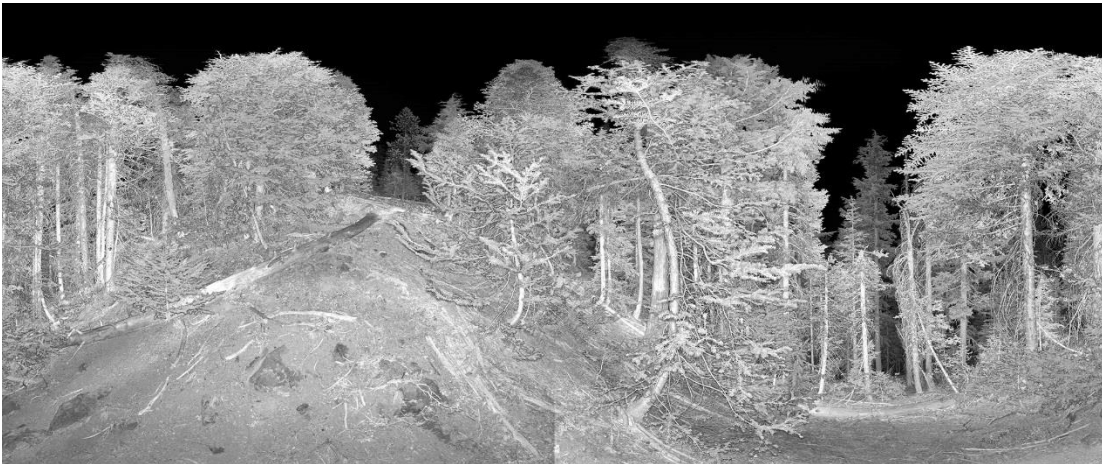

| Scan #/ Plot # / Date / Time | UTM (NAD 83)        | Aspect / Degree / TT | LiDDI / BA (m <sup>2</sup> /ha) / DBH V (cm) |
|------------------------------|---------------------|----------------------|----------------------------------------------|
| 009 / KB4 / 8-21-2014 / 1830 | 10T 0599040 4874412 | 250° / 33° / 6m 10°  | 3.0 / 25 / 32                                |

| Name            | EcoRegion     | Ecological Systems Description                                      |
|-----------------|---------------|---------------------------------------------------------------------|
| Limpy Rock (LR) | West Cascades | North Pacific Maritime Dry-Mesic Douglas-fir-Western Hemlock Forest |

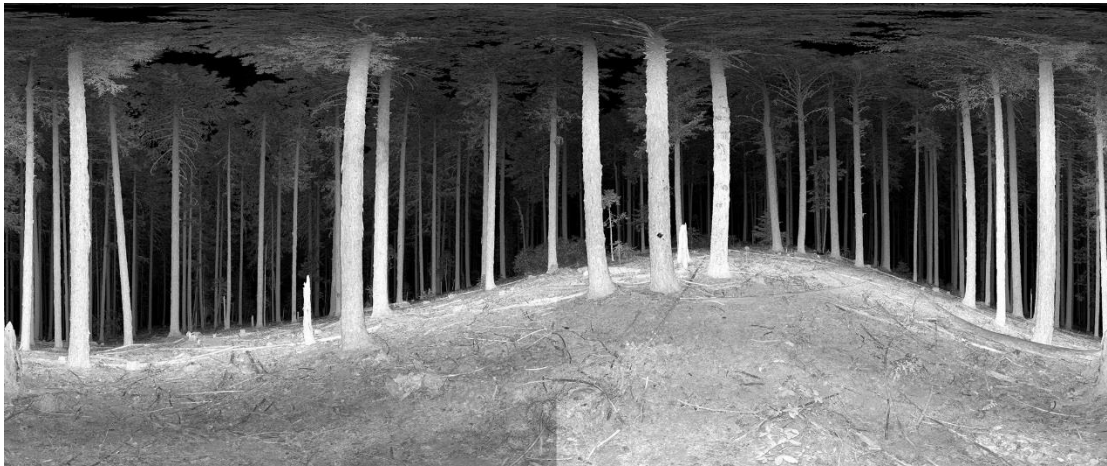

| Scan #/ Plot # / Date / Time  | UTM (NAD 83)        | Aspect / Degree / TT | LiDDI / BA (m <sup>2</sup> /ha) / DBH V (cm) |
|-------------------------------|---------------------|----------------------|----------------------------------------------|
| 000 / LR3 / 09-08-2014 / 1515 | 10T 0530203 4797769 | 190° / 15° / 4m 370° | 3.9 / 87 / 41                                |

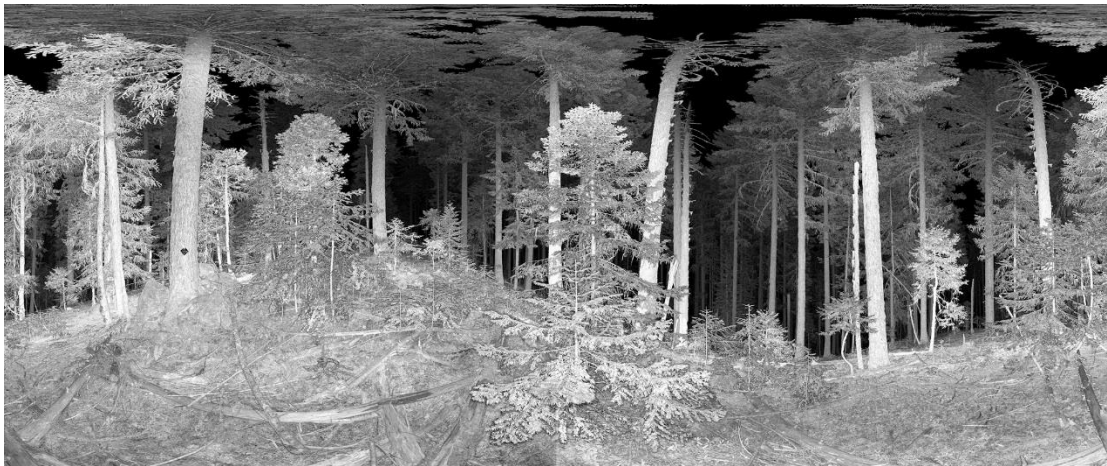

| Scan #/ Plot # / Date / Time  | UTM (NAD 83)        | Aspect / Degree / TT | LiDDI / BA (m <sup>2</sup> /ha) / DBH V (cm) |
|-------------------------------|---------------------|----------------------|----------------------------------------------|
| 001 / LR6 / 09-08-2014 / 1550 | 10T 0530232 4797670 | 160° / 16° / 3m 270° | 3.0 / 86 / 84                                |

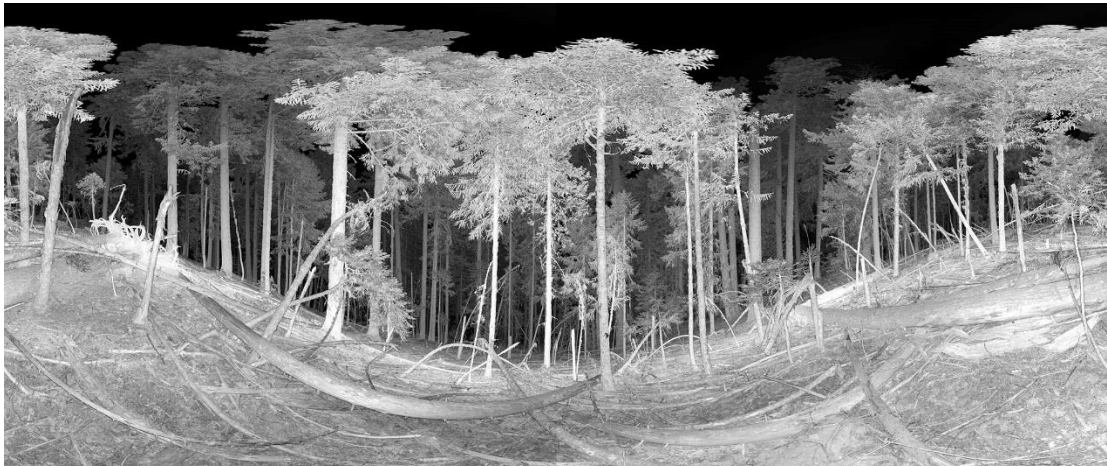

| Scan #/ Plot # / Date / Time  | UTM (NAD 83)        | Aspect / Degree / TT | LiDDI / BA (m <sup>2</sup> /ha) / DBH V (cm) |
|-------------------------------|---------------------|----------------------|----------------------------------------------|
| 002 / LR9 / 09-08-2014 / 1620 | 10T 0530257 4797578 | 155° / 24° / 4m 180° | 3.0 / 40 / 70                                |

| Name            | EcoRegion     | Ecological Systems Description                                      |
|-----------------|---------------|---------------------------------------------------------------------|
| Limpy Rock (LR) | West Cascades | North Pacific Maritime Dry-Mesic Douglas-fir-Western Hemlock Forest |

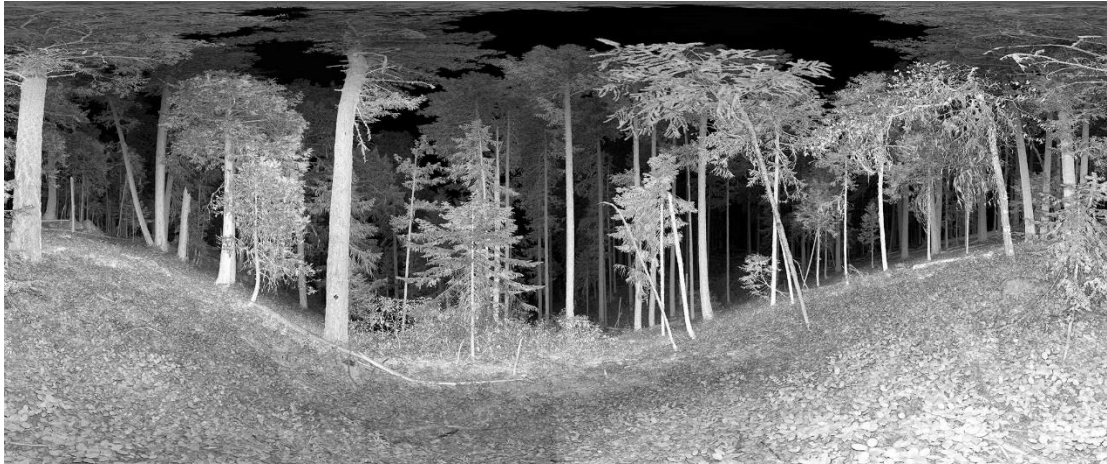

| Scan #/ Plot # / Date / Time  | UTM (NAD 83)        | Aspect / Degree / TT | LiDDI / BA (m <sup>2</sup> /ha) / DBH V (cm) |
|-------------------------------|---------------------|----------------------|----------------------------------------------|
| 003 / LR8 / 09-08-2014 / 1645 | 10T 0530156 4797543 | 205° / 26° / 4m 145° | 3.0 / 69 / 127                               |

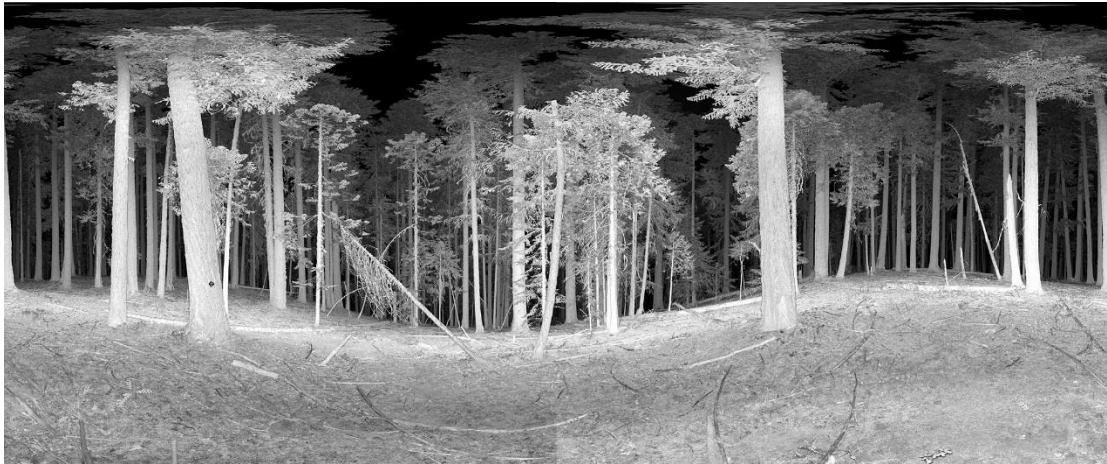

| Scan #/ Plot # / Date / Time  | UTM (NAD 83)        | Aspect / Degree / TT | LiDDI / BA (m <sup>2</sup> /ha) / DBH V (cm) |
|-------------------------------|---------------------|----------------------|----------------------------------------------|
| 004 / LR7 / 09-08-2014 / 1710 | 10T 0530063 4797519 | 180° / 18° / 4m 80°  | 3.9 / 143 / 171                              |

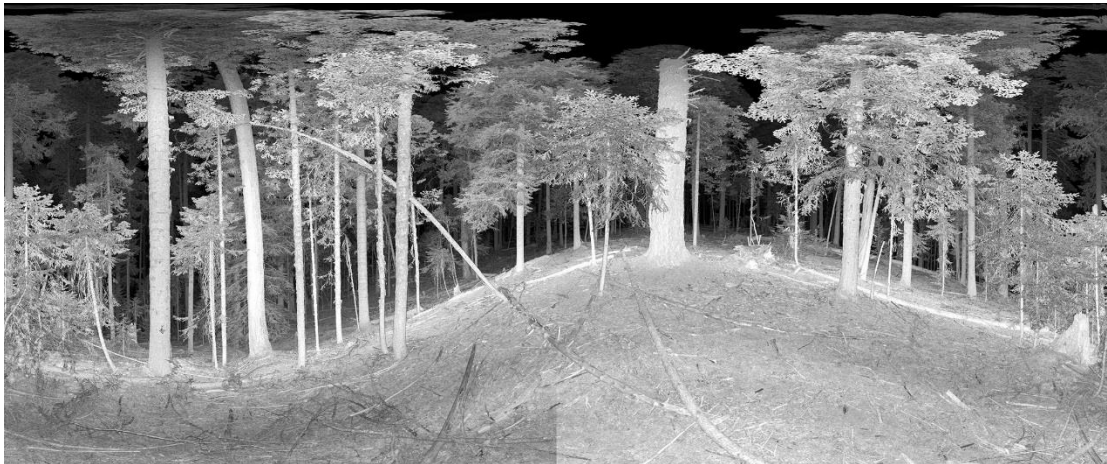

| Scan #/ Plot # / Date / Time  | UTM (NAD 83)        | Aspect / Degree / TT | LiDDI / BA (m <sup>2</sup> /ha) / DBH V (cm) |
|-------------------------------|---------------------|----------------------|----------------------------------------------|
| 005 / LR5 / 09-08-2014 / 1740 | 10T 0530130 4797651 | 220° / 15° / 4m 200° | 3.0 / 62 / 161                               |

| Name            | EcoRegion     | Ecological Systems Description                                      |
|-----------------|---------------|---------------------------------------------------------------------|
| Limpy Rock (LR) | West Cascades | North Pacific Maritime Dry-Mesic Douglas-fir-Western Hemlock Forest |

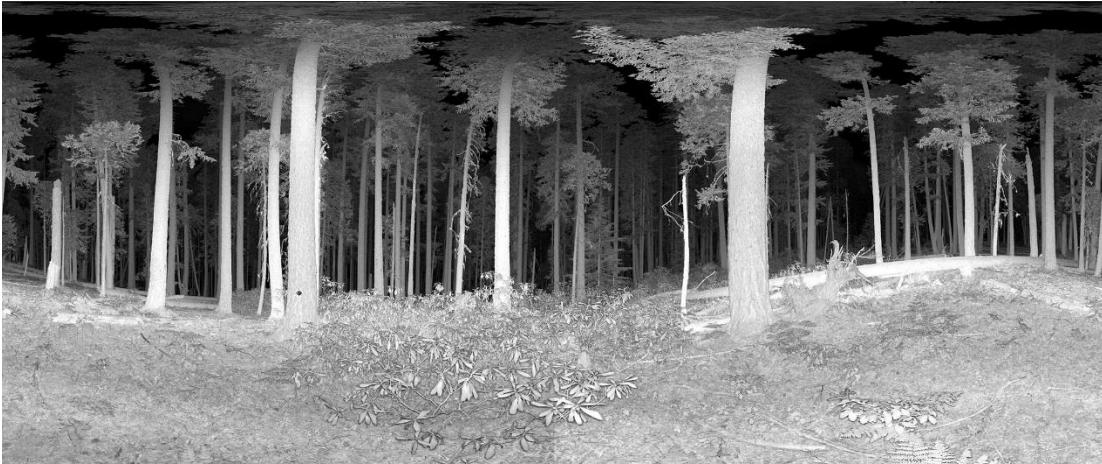

| Scan #/ Plot # / Date / Time  | UTM (NAD 83)        | Aspect / Degree / TT | LiDDI / BA (m <sup>2</sup> /ha) / DBH V (cm) |
|-------------------------------|---------------------|----------------------|----------------------------------------------|
| 006 / LR4 / 09-08-2014 / 1810 | 10T 0530042 4797613 | 195° / 12° / 4m 160° | 3.0 / 80 / 135                               |

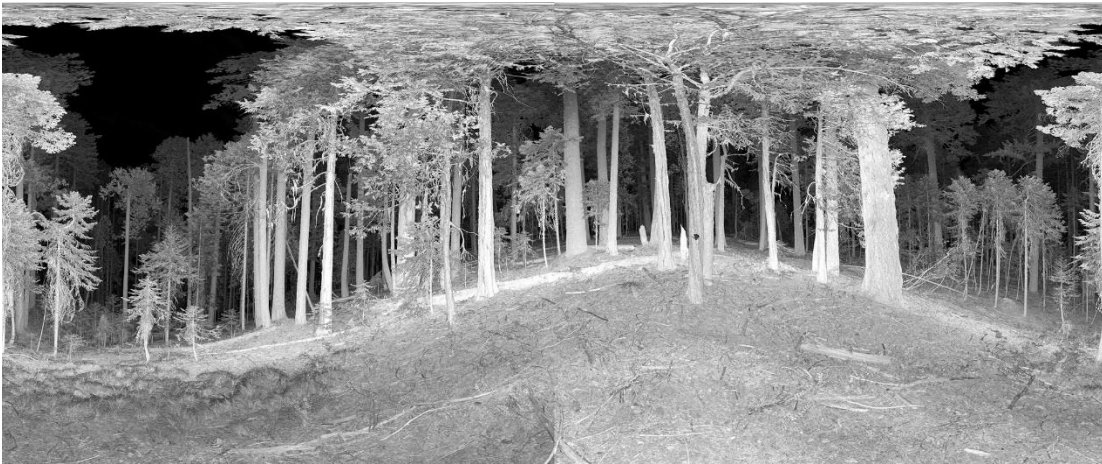

| Scan #/ Plot # / Date / Time  | UTM (NAD 83)        | Aspect / Degree / TT | LiDDI / BA (m <sup>2</sup> /ha) / DBH V (cm) |
|-------------------------------|---------------------|----------------------|----------------------------------------------|
| 007 / LR1 / 09-08-2014 / 1840 | 10T 0530007 4797712 | 155° / 20° / 3m 330° | 5.0 / 125 / 198                              |

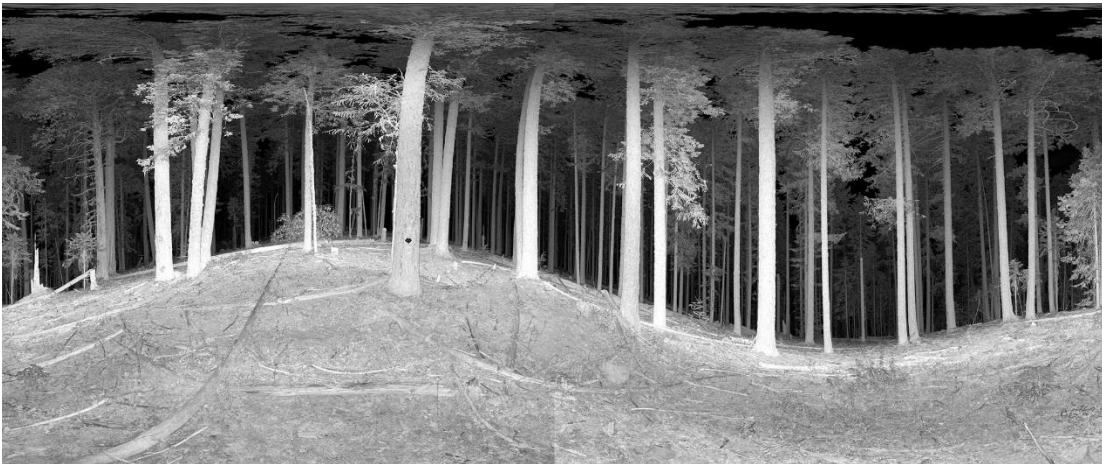

| Scan #/ Plot # / Date / Time  | UTM (NAD 83)        | Aspect / Degree / TT | LiDDI / BA (m <sup>2</sup> /ha) / DBH V (cm) |
|-------------------------------|---------------------|----------------------|----------------------------------------------|
| 008 / LR2 / 09-08-2014 / 1910 | 10T 0530100 4797738 | 230° / 14° / 4m 30°  | 3.9 / 88 / 64                                |

| Name             | EcoRegion         | Ecological Systems Description                                   |
|------------------|-------------------|------------------------------------------------------------------|
| Little Sink (LS) | Willamette Valley | North Pacific Lowland Mixed Hardwood-Conifer Forest and Woodland |

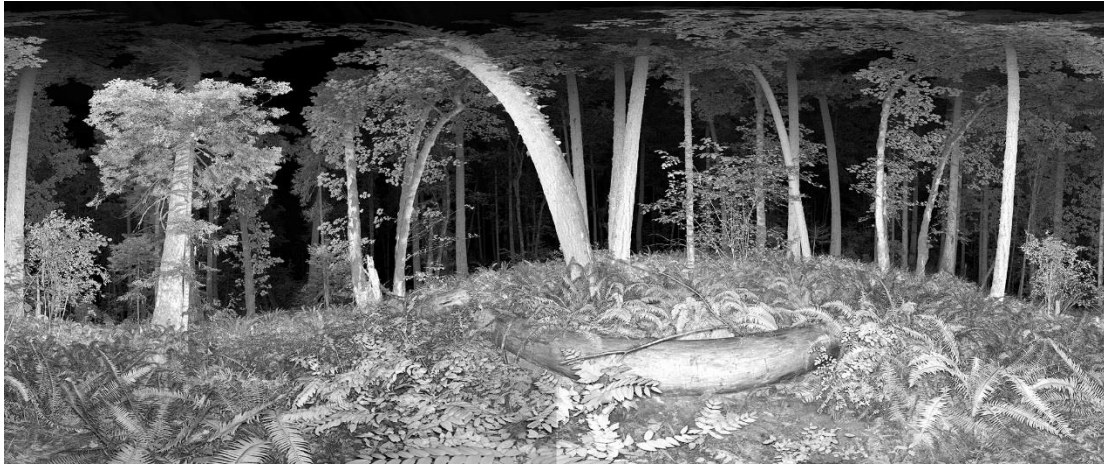

| Scan #/ Plot # / Date / Time  | UTM (NAD 83)        | Aspect / Degree / TT | LiDDI / BA (m <sup>2</sup> /ha) / DBH V (cm) |
|-------------------------------|---------------------|----------------------|----------------------------------------------|
| 000 / LS1 / 09-25-2014 / 1235 | 10T 0465318 4964768 | 320° / 15° / -       | 5.9 / 124 / 256                              |

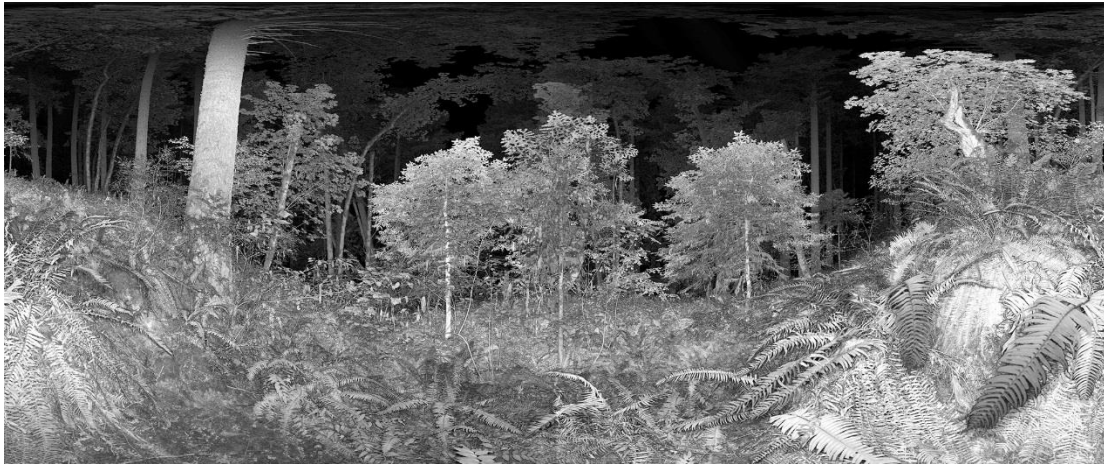

| Scan #/ Plot # / Date / Time  | UTM (NAD 83)        | Aspect / Degree / TT | LiDDI / BA (m <sup>2</sup> /ha) / DBH V (cm) |
|-------------------------------|---------------------|----------------------|----------------------------------------------|
| 001 / LS2 / 09-25-2014 / 1300 | 10T 0465418 4964791 | 310° / 20° / 5m 310° | 3.8 / 40 / 335                               |

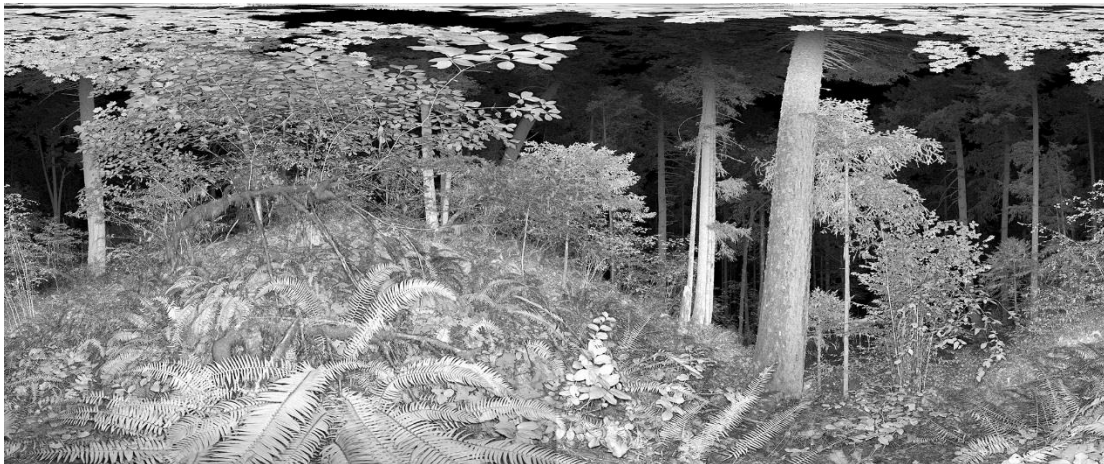

| Scan #/ Plot # / Date / Time  | UTM (NAD 83)        | Aspect / Degree / TT | LiDDI / BA (m <sup>2</sup> /ha) / DBH V (cm) |
|-------------------------------|---------------------|----------------------|----------------------------------------------|
| 002 / LS3 / 09-25-2014 / 1330 | 10T 0465519 4964809 | 335° / 20° / 4m 45°  | 3.8 / 49 / 354                               |

| Name             | EcoRegion         | Ecological Systems Description                                   |
|------------------|-------------------|------------------------------------------------------------------|
| Little Sink (LS) | Willamette Valley | North Pacific Lowland Mixed Hardwood-Conifer Forest and Woodland |

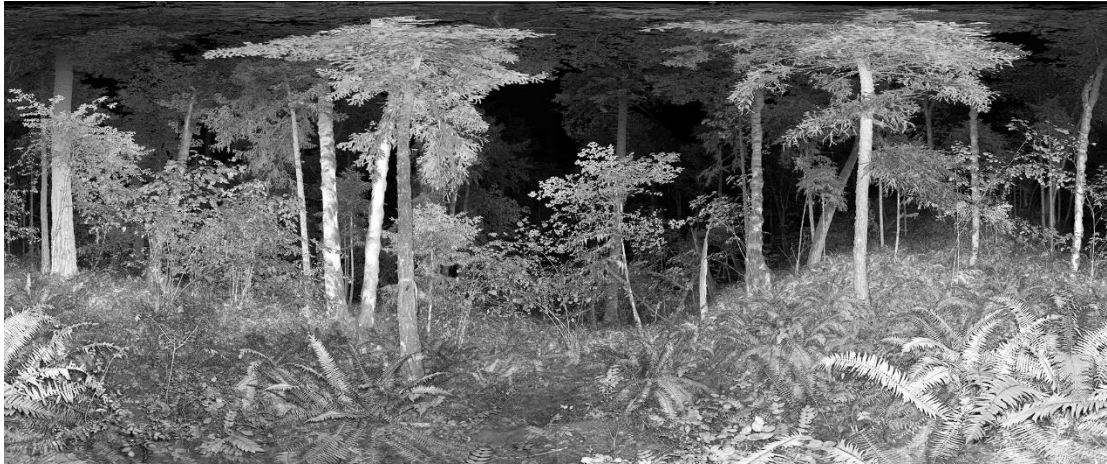

| Scan #/ Plot # / Date / Time  | UTM (NAD 83)        | Aspect / Degree / TT | LiDDI / BA (m <sup>2</sup> /ha) / DBH V (cm) |
|-------------------------------|---------------------|----------------------|----------------------------------------------|
| 003 / LS6 / 09-25-2014 / 1400 | 10T 0465549 4964718 | 320° / 11° / 2m 310° | 5.1 / 82 / 338                               |

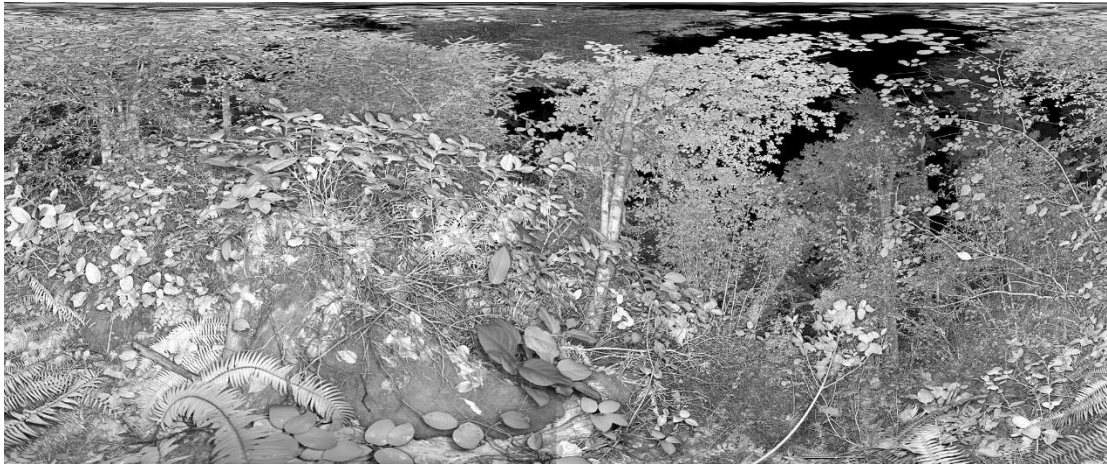

| Scan #/ Plot # / Date / Time  | UTM (NAD 83)        | Aspect / Degree / TT | LiDDI / BA (m <sup>2</sup> /ha) / DBH V (cm) |
|-------------------------------|---------------------|----------------------|----------------------------------------------|
| 004 / LS9 / 09-25-2014 / 1520 | 10T 0465568 4964625 | 310° / 35° / 2m 240° | 1.2 / 7 / 37                                 |

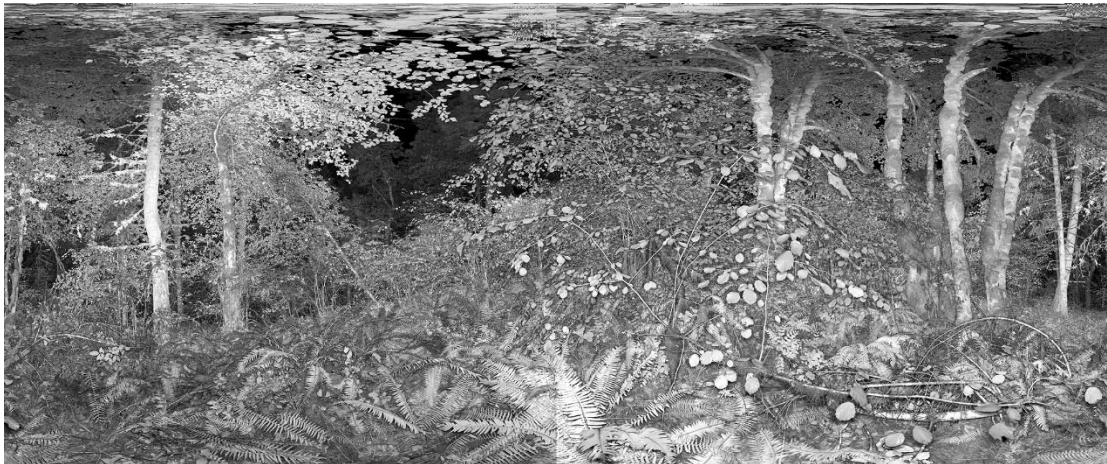

| Scan #/ Plot # / Date / Time  | UTM (NAD 83)        | Aspect / Degree / TT | LiDDI / BA (m <sup>2</sup> /ha) / DBH V (cm) |
|-------------------------------|---------------------|----------------------|----------------------------------------------|
| 005 / LS8 / 09-25-2014 / 1550 | 10T 0465467 4964598 | 300° / 12° / 5m 215° | 3.0 / 50 / 125                               |

| Name             | EcoRegion         | Ecological Systems Description                                   |
|------------------|-------------------|------------------------------------------------------------------|
| Little Sink (LS) | Willamette Valley | North Pacific Lowland Mixed Hardwood-Conifer Forest and Woodland |

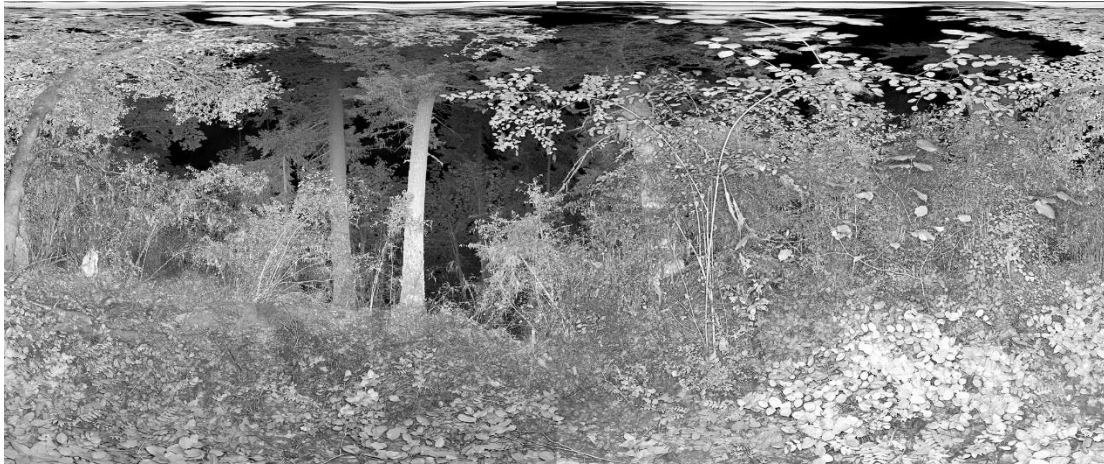

| Scan #/ Plot # / Date / Time  | UTM (NAD 83)        | Aspect / Degree / TT | LiDDI / BA (m <sup>2</sup> /ha) / DBH V (cm) |
|-------------------------------|---------------------|----------------------|----------------------------------------------|
| 006 / LS5 / 09-25-2014 / 1620 | 10T 0465445 4964691 | 300° / 8° / 4m 145°  | 4.8 / 65 / 558                               |

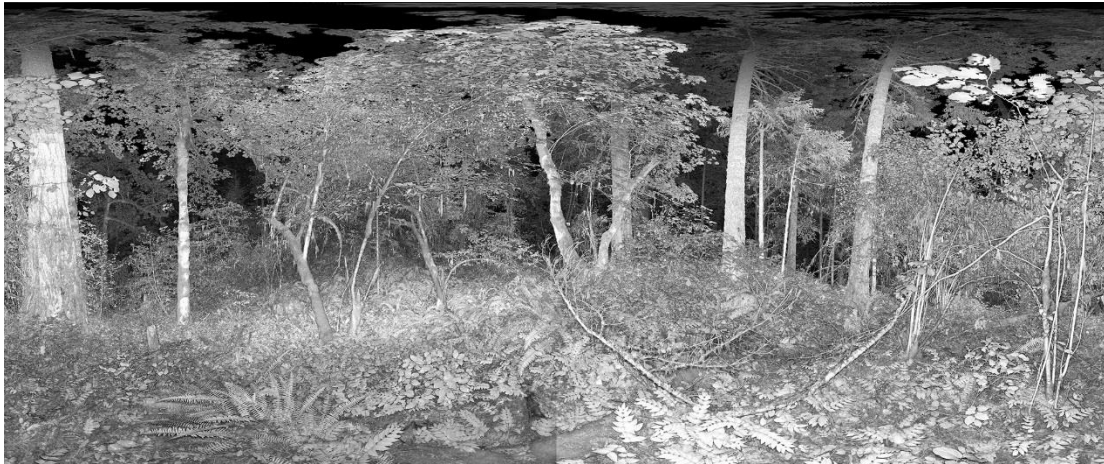

| Scan #/ Plot # / Date / Time  | UTM (NAD 83)        | Aspect / Degree / TT | LiDDI / BA (m <sup>2</sup> /ha) / DBH V (cm) |
|-------------------------------|---------------------|----------------------|----------------------------------------------|
| 007 / LS7 / 09-25-2014 / 1650 | 10T 0465371 4964577 | 5° / 7° / 5m 210°    | 4.8 / 67 / 544                               |

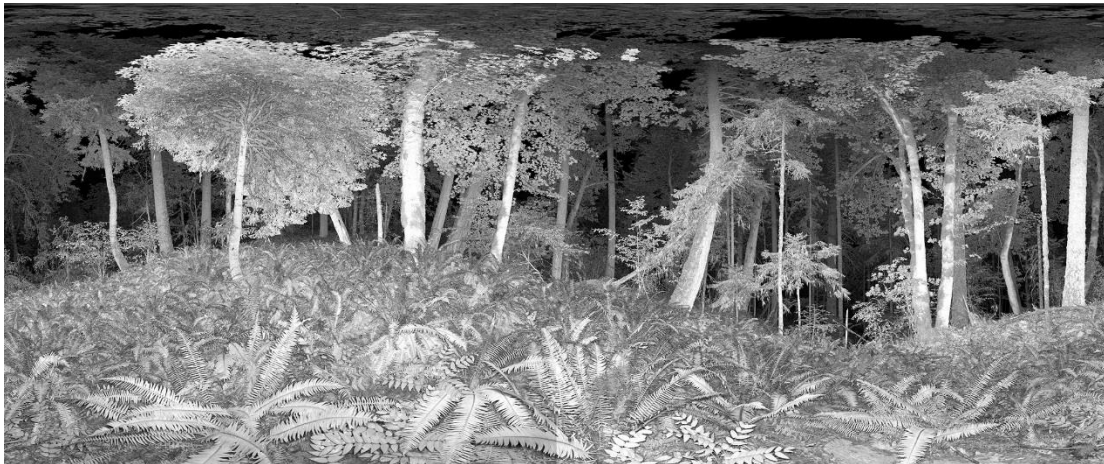

| Scan #/ Plot # / Date / Time  | UTM (NAD 83)       | Aspect / Degree / TT | LiDDI / BA (m <sup>2</sup> /ha) / DBH V (cm) |
|-------------------------------|--------------------|----------------------|----------------------------------------------|
| 008 / LS4 / 09-25-2014 / 1720 | 10T 0465340 496472 | 325° / 14° / 4m 100° | 5.1 / 116 / 355                              |

| Name             | EcoRegion     | Ecological Systems Description                              |
|------------------|---------------|-------------------------------------------------------------|
| Mokst Butte (MB) | East Cascades | Northern Rocky Mountain Ponderosa Pine Woodland and Savanna |

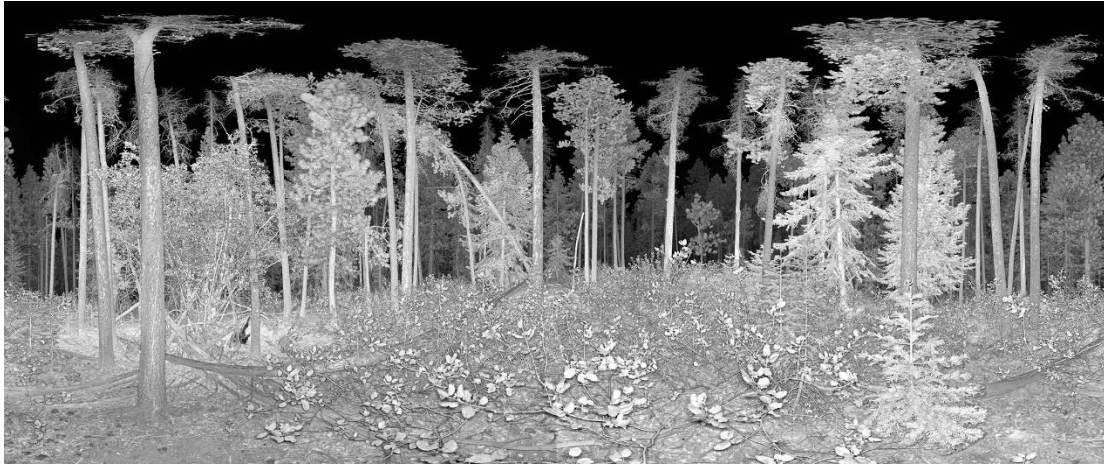

| Scan #/ Plot # / Date / Time | UTM (NAD 83)        | Aspect / Degree / TT | LiDDI / BA (m <sup>2</sup> /ha) / DBH V (cm) |
|------------------------------|---------------------|----------------------|----------------------------------------------|
| 000 / MB9 / 09-11-2014 / 820 | 10T 0637668 4856129 | 30° / 8° / 3m 320°   | 3.0 / 34 / 25                                |

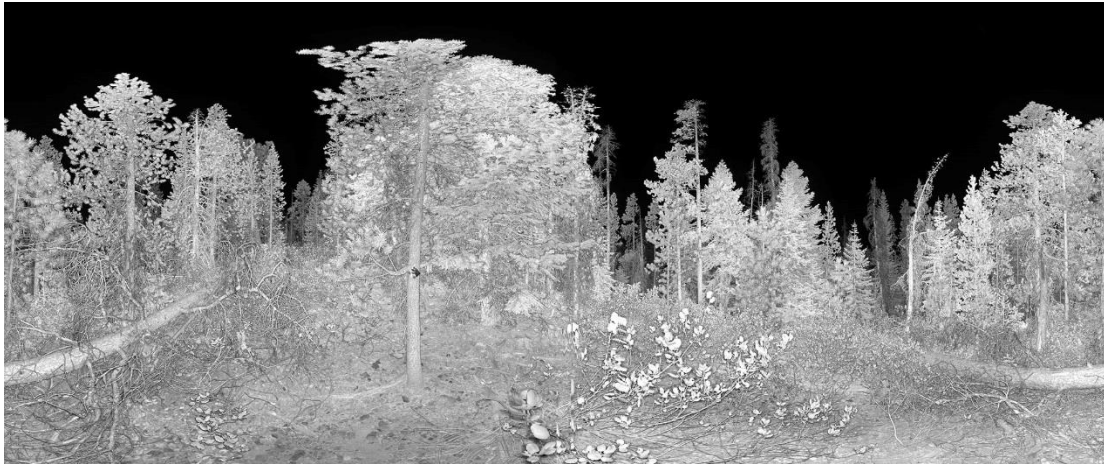

| Scan #/ Plot # / Date / Time | UTM (NAD 83)        | Aspect / Degree / TT | LiDDI / BA (m <sup>2</sup> /ha) / DBH V (cm) |
|------------------------------|---------------------|----------------------|----------------------------------------------|
| 001 / MB8 / 09-11-2014 / 850 | 10T 0637576 4856099 | 40° / 13° / 2m 235°  | 1.0 / 3 / 18                                 |

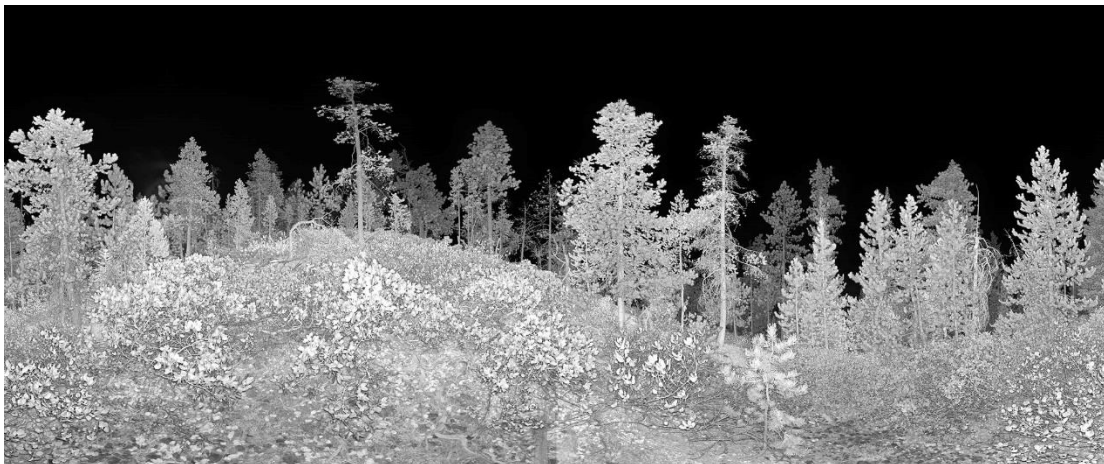

| Scan #/ Plot # / Date / Time | UTM (NAD 83)        | Aspect / Degree / TT | LiDDI / BA (m <sup>2</sup> /ha) / DBH V (cm) |
|------------------------------|---------------------|----------------------|----------------------------------------------|
| 002 / MB7 / 09-11-2014 / 920 | 10T 0637475 4856076 | 360° / 8° / 6m 280°  | 1.4 / 12 / 12                                |

| Name             | EcoRegion     | Ecological Systems Description                              |
|------------------|---------------|-------------------------------------------------------------|
| Mokst Butte (MB) | East Cascades | Northern Rocky Mountain Ponderosa Pine Woodland and Savanna |

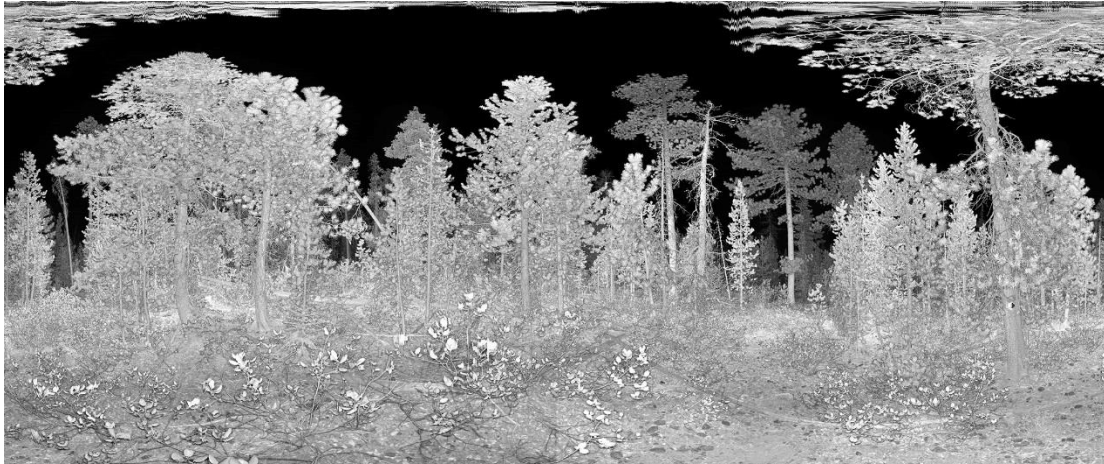

| Scan #/ Plot # / Date / Time | UTM (NAD 83)        | Aspect / Degree / TT | LiDDI / BA (m <sup>2</sup> /ha) / DBH V (cm) |
|------------------------------|---------------------|----------------------|----------------------------------------------|
| 003 / MB5 / 09-11-2014 / 950 | 10T 0637542 4856195 | 10° / 7° / 3m 20°    | 2.0 / 9 / 61                                 |

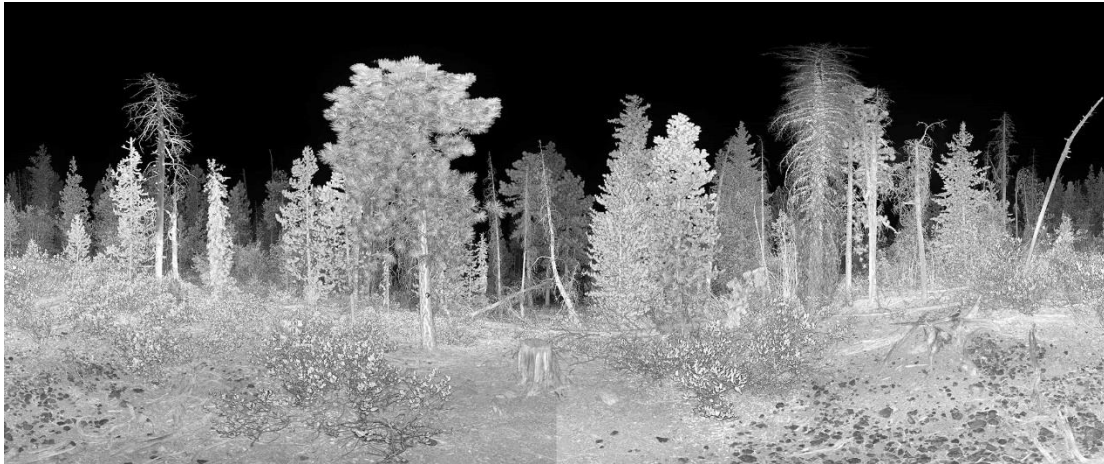

| Scan #/ Plot # / Date / Time  | UTM (NAD 83)        | Aspect / Degree / TT | LiDDI / BA (m <sup>2</sup> /ha) / DBH V (cm) |
|-------------------------------|---------------------|----------------------|----------------------------------------------|
| 004 / MB4 / 09-11-2014 / 1020 | 10T 0637455 4856178 | 360° / 8° / 3m 330°  | 1.8 / 11 / 18                                |

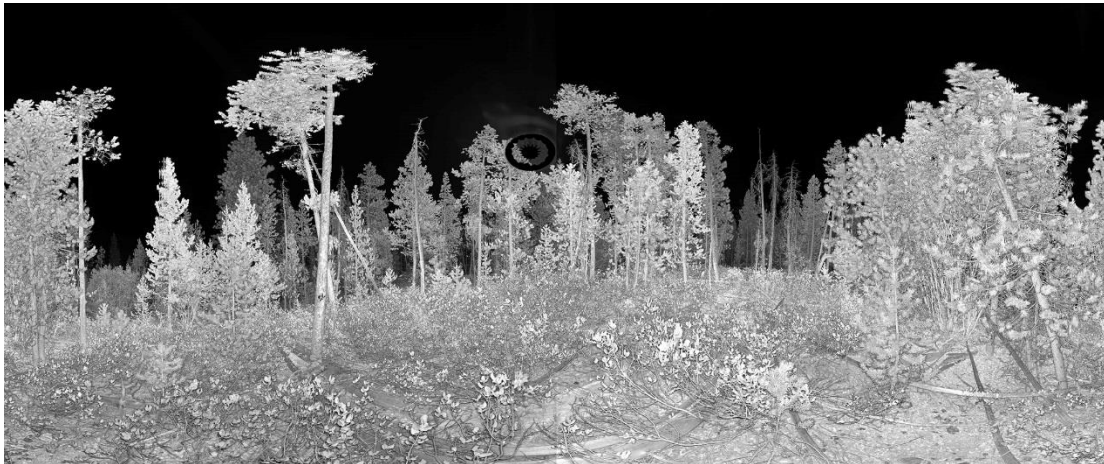

| Scan #/ Plot # / Date / Time  | UTM (NAD 83)        | Aspect / Degree / TT | LiDDI / BA (m <sup>2</sup> /ha) / DBH V (cm) |
|-------------------------------|---------------------|----------------------|----------------------------------------------|
| 005 / MB1 / 09-11-2014 / 1045 | 10T 0637422 4856273 | 345° / 13° / 3m 80°  | 1.4 / 6 / 9                                  |

| Name             | EcoRegion     | Ecological Systems Description                              |
|------------------|---------------|-------------------------------------------------------------|
| Mokst Butte (MB) | East Cascades | Northern Rocky Mountain Ponderosa Pine Woodland and Savanna |

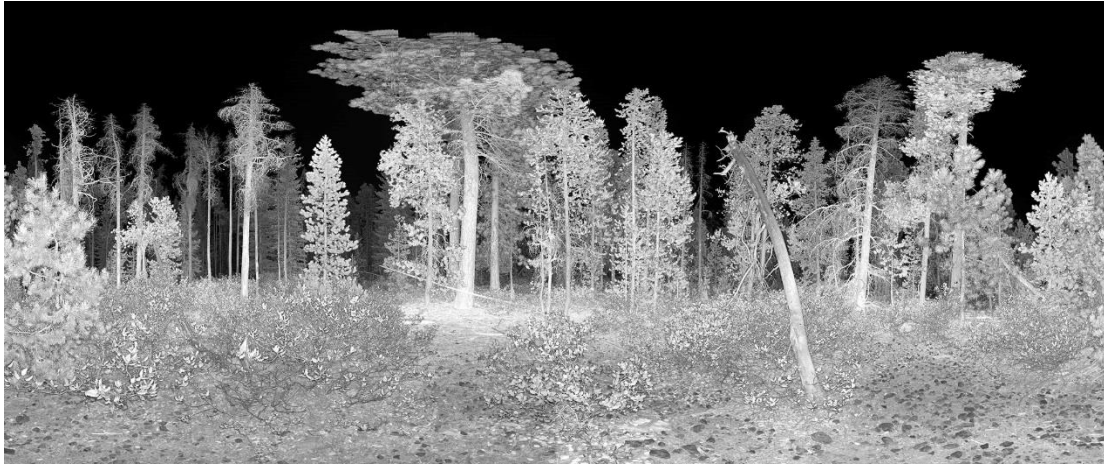

| Scan #/ Plot # / Date / Time  | UTM (NAD 83)        | Aspect / Degree / TT | LiDDI / BA (m <sup>2</sup> /ha) / DBH V (cm) |
|-------------------------------|---------------------|----------------------|----------------------------------------------|
| 006 / MB2 / 09-11-2014 / 1110 | 10T 0637523 4856301 | 290° / 3° / 6m 310°  | 3.0 / 29 / 83                                |

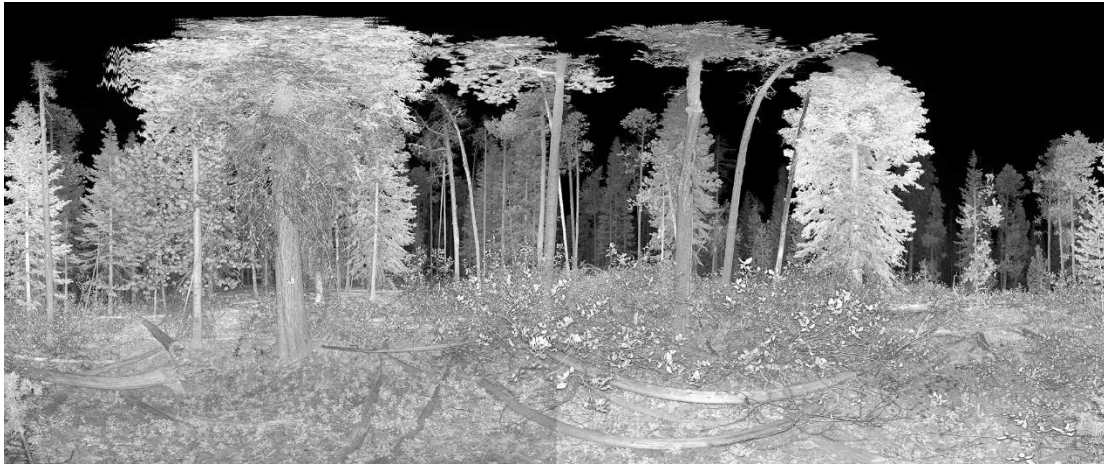

| Scan #/ Plot # / Date / Time  | UTM (NAD 83)        | Aspect / Degree / TT | LiDDI / BA (m <sup>2</sup> /ha) / DBH V (cm) |
|-------------------------------|---------------------|----------------------|----------------------------------------------|
| 007 / MB3 / 09-11-2014 / 1140 | 10T 0637627 4856325 | - / - / 3m 150°      | 3.0 / 29 / 26                                |

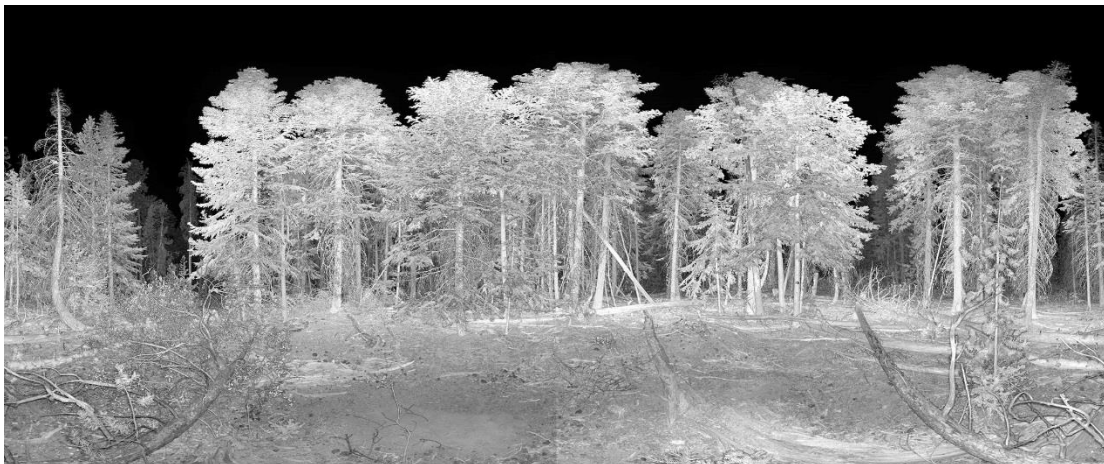

| Scan #/ Plot # / Date / Time  | UTM (NAD 83)        | Aspect / Degree / TT | LiDDI / BA (m <sup>2</sup> /ha) / DBH V (cm) |
|-------------------------------|---------------------|----------------------|----------------------------------------------|
| 008 / MB6 / 09-11-2014 / 1210 | 10T 0637640 4856230 | 360° / 5° / 5m 180°  | 2.9 / 124 / 123                              |

| Name              | EcoRegion     | Ecological Systems Description                                |
|-------------------|---------------|---------------------------------------------------------------|
| Monte Cristo (MC) | East Cascades | East Cascades Mesic Montane Mixed-Conifer Forest and Woodland |

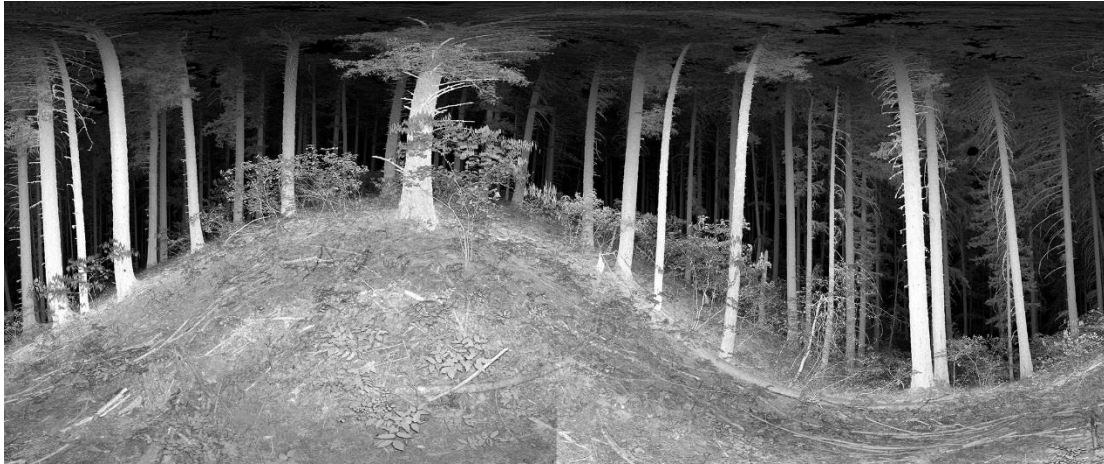

| Scan #/ Plot # / Date / Time  | UTM (NAD 83)        | Aspect / Degree / TT | LiDDI / BA (m <sup>2</sup> /ha) / DBH V (cm) |
|-------------------------------|---------------------|----------------------|----------------------------------------------|
| 000 / MC9 / 08-27-2014 / 1510 | 10T 0610053 5083450 | 224° / 30° / 6m 320° | 2.9 / 124 / 123                              |

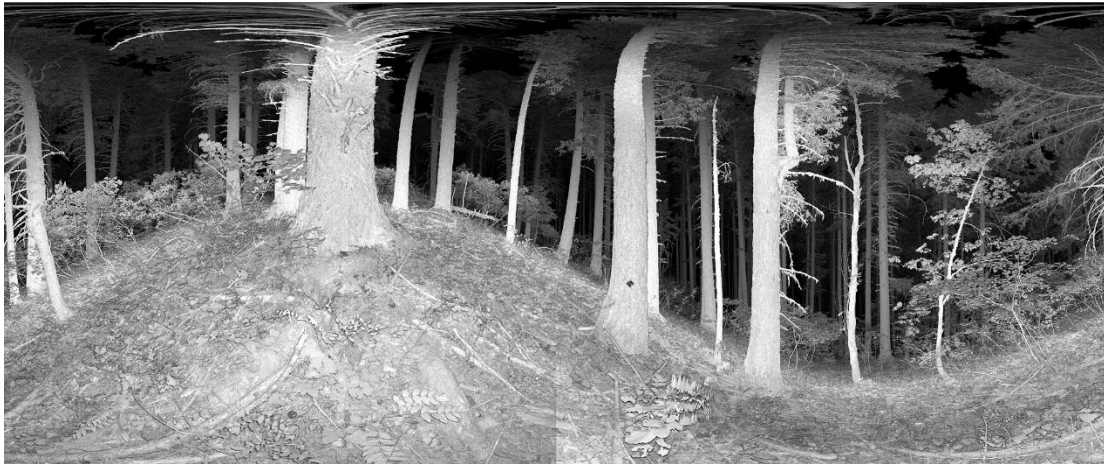

| Scan #/ Plot # / Date / Time  | UTM (NAD 83)        | Aspect / Degree / TT | LiDDI / BA (m <sup>2</sup> /ha) / DBH V (cm) |
|-------------------------------|---------------------|----------------------|----------------------------------------------|
| 001 / MC6 / 08-27-2014 / 1610 | 10T 0610038 5083557 | 264° / 26° / 3m 154° | 4.0 / 116 / 238                              |

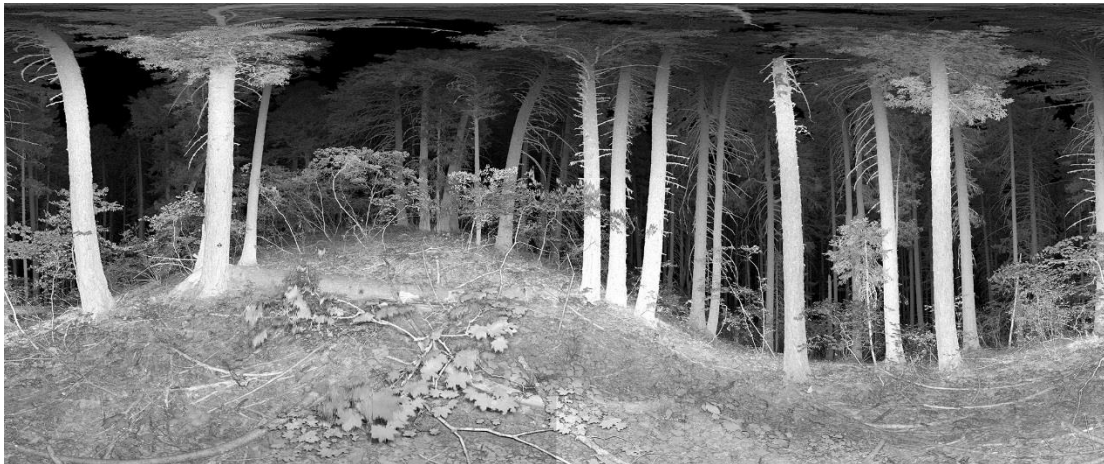

| Scan #/ Plot # / Date / Time  | UTM (NAD 83)        | Aspect / Degree / TT | LiDDI / BA (m <sup>2</sup> /ha) / DBH V (cm) |
|-------------------------------|---------------------|----------------------|----------------------------------------------|
| 002 / MC5 / 08-27-2014 / 1650 | 10T 0609954 5083522 | 265° / 17° / 5m 350° | 3.6 / 113 / 249                              |

| Name              | EcoRegion     | Ecological Systems Description                                |
|-------------------|---------------|---------------------------------------------------------------|
| Monte Cristo (MC) | East Cascades | East Cascades Mesic Montane Mixed-Conifer Forest and Woodland |

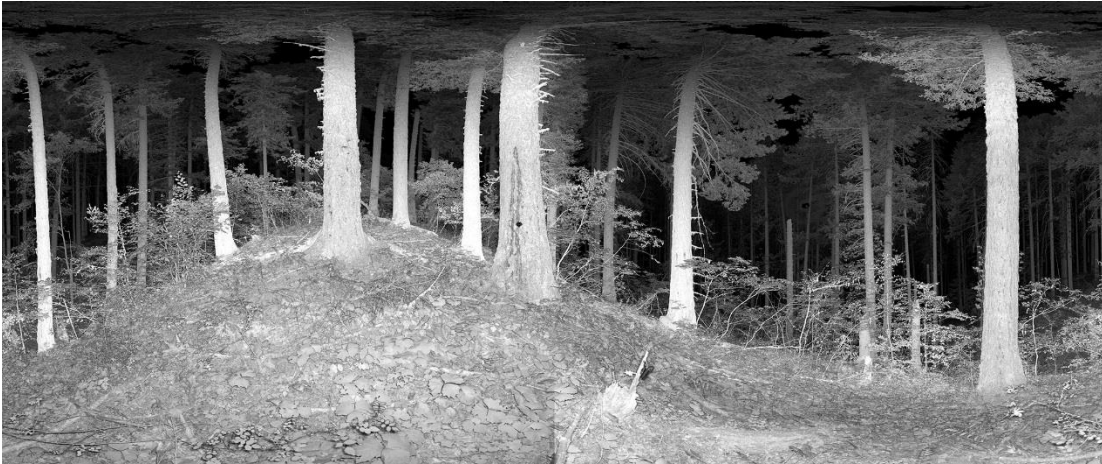

| Scan #/ Plot # / Date / Time  | UTM (NAD 83)        | Aspect / Degree / TT | LiDDI / BA (m <sup>2</sup> /ha) / DBH V (cm) |
|-------------------------------|---------------------|----------------------|----------------------------------------------|
| 004 / MC8 / 08-27-2014 / 1725 | 10T 0609939 5083426 | 286° / 22° / 4m 160° | 4.4 / 112 / 161                              |

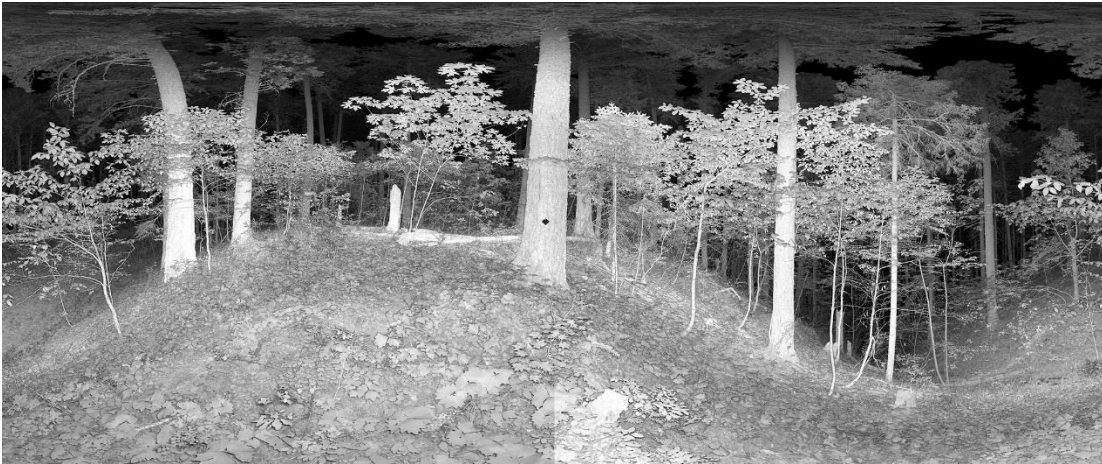

| Scan #/ Plot # / Date / Time  | UTM (NAD 83)        | Aspect / Degree / TT | LiDDI / BA (m <sup>2</sup> /ha) / DBH V (cm) |
|-------------------------------|---------------------|----------------------|----------------------------------------------|
| 005 / MC7 / 08-27-2014 / 1805 | 10T 0609856 5083416 | 340° / 21° / 4m 170° | 4.0 / 81 / 348                               |

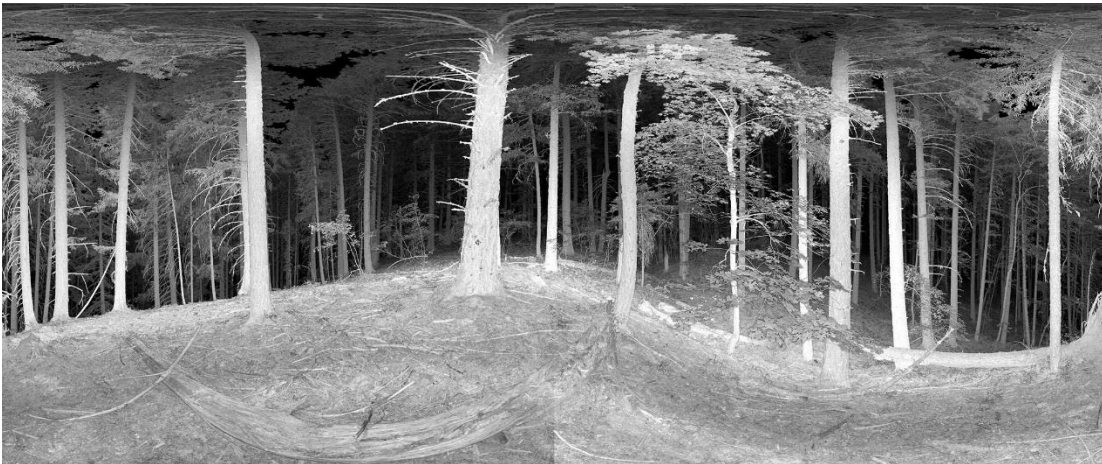

| Scan #/ Plot # / Date / Time  | UTM (NAD 83)        | Aspect / Degree / TT | LiDDI / BA (m <sup>2</sup> /ha) / DBH V (cm) |
|-------------------------------|---------------------|----------------------|----------------------------------------------|
| 006 / MC4 / 08-27-2014 / 1840 | 10T 0609833 5083524 | 126° / 18° / 4m 320° | 3.0 / 72 / 154                               |

| Name              | EcoRegion     | Ecological Systems Description                                |
|-------------------|---------------|---------------------------------------------------------------|
| Monte Cristo (MC) | East Cascades | East Cascades Mesic Montane Mixed-Conifer Forest and Woodland |

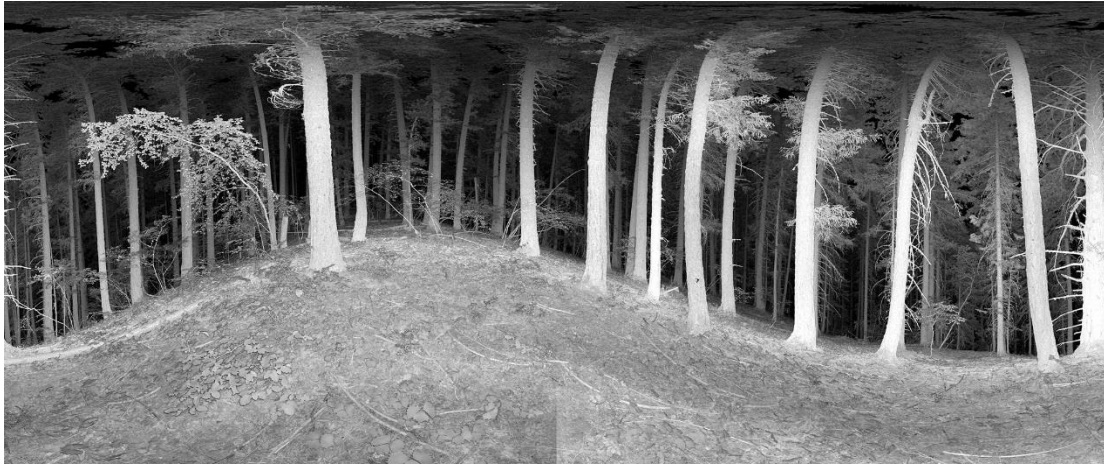

| Scan #/ Plot # / Date / Time  | UTM (NAD 83)        | Aspect / Degree / TT | LiDDI / BA (m <sup>2</sup> /ha) / DBH V (cm) |
|-------------------------------|---------------------|----------------------|----------------------------------------------|
| 007 / MC1 / 08-27-2014 / 1910 | 10T 0609820 5083618 | 250° / 18° / 4m 200° | 3.9 / 121 / 140                              |

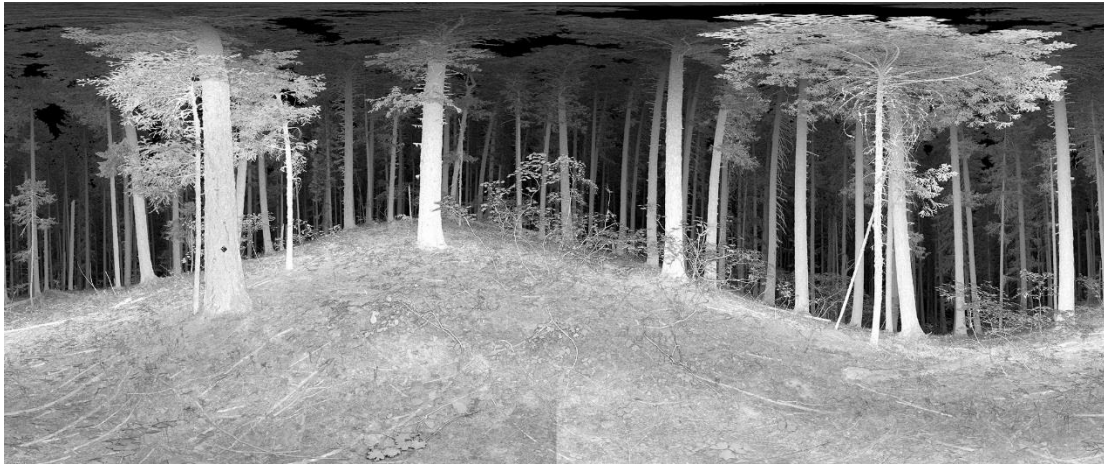

| Scan #/ Plot # / Date / Time  | UTM (NAD 83)        | Aspect / Degree / TT | LiDDI / BA (m <sup>2</sup> /ha) / DBH V (cm) |
|-------------------------------|---------------------|----------------------|----------------------------------------------|
| 008 / MC2 / 08-27-2014 / 1940 | 10T 0609911 5083643 | 220° / 13° / 4m 340° | 3.0 / 109 / 232                              |

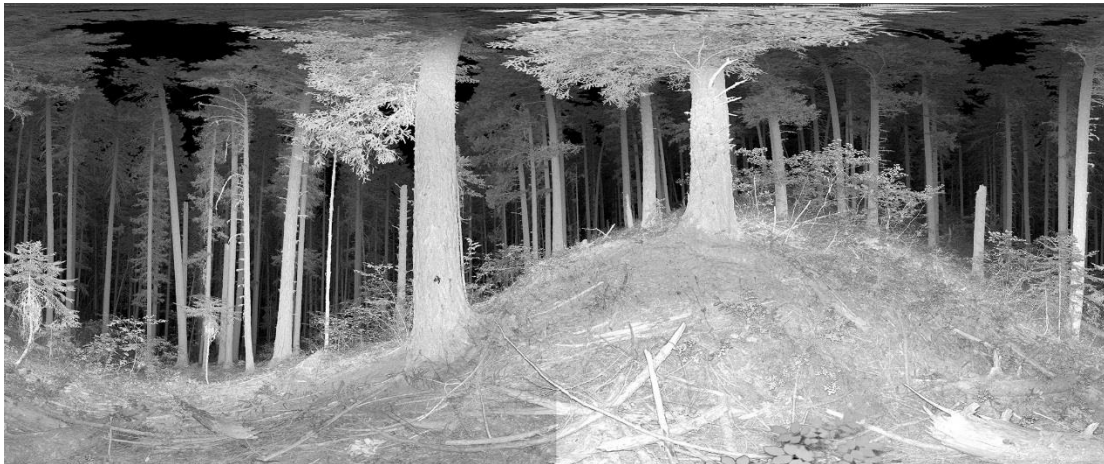

| Scan #/ Plot # / Date / Time  | UTM (NAD 83)        | Aspect / Degree / TT | LiDDI / BA (m <sup>2</sup> /ha) / DBH V (cm) |
|-------------------------------|---------------------|----------------------|----------------------------------------------|
| 009 / MC3 / 08-27-2014 / 2010 | 10T 0610006 5083666 | 240° / 28° / 3m 320° | 4.9 / 95 / 165                               |

| Name            | EcoRegion     | Ecological Systems Description                                |
|-----------------|---------------|---------------------------------------------------------------|
| Mill Creek (ML) | East Cascades | East Cascades Mesic Montane Mixed-Conifer Forest and Woodland |

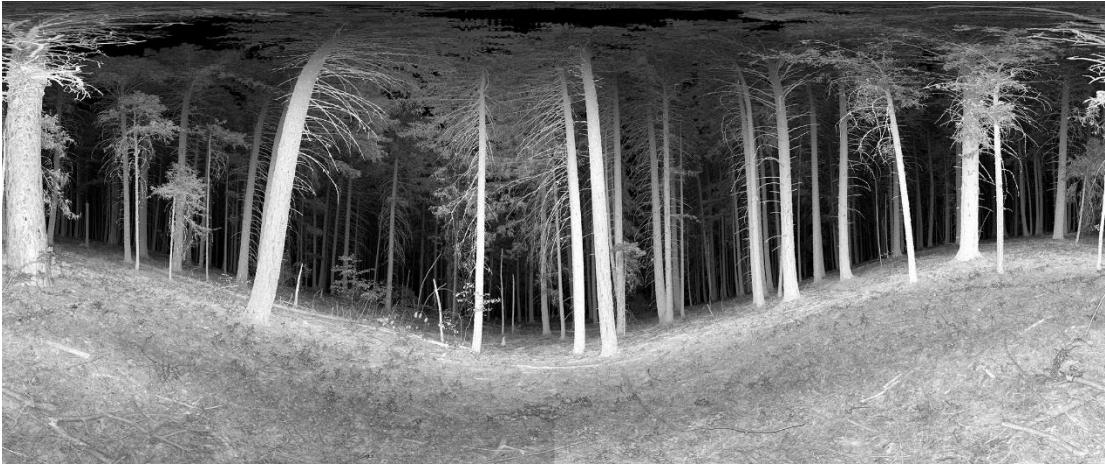

| Scan #/ Plot # / Date / Time  | UTM (NAD 83)        | Aspect / Degree / TT | LiDDI / BA (m <sup>2</sup> /ha) / DBH V (cm) |
|-------------------------------|---------------------|----------------------|----------------------------------------------|
| 000 / ML8 / 09-30-2014 / 1200 | 10T 0622374 5037955 | 175° / 16° / 3m 355° | 3.9 / 95 / 178                               |

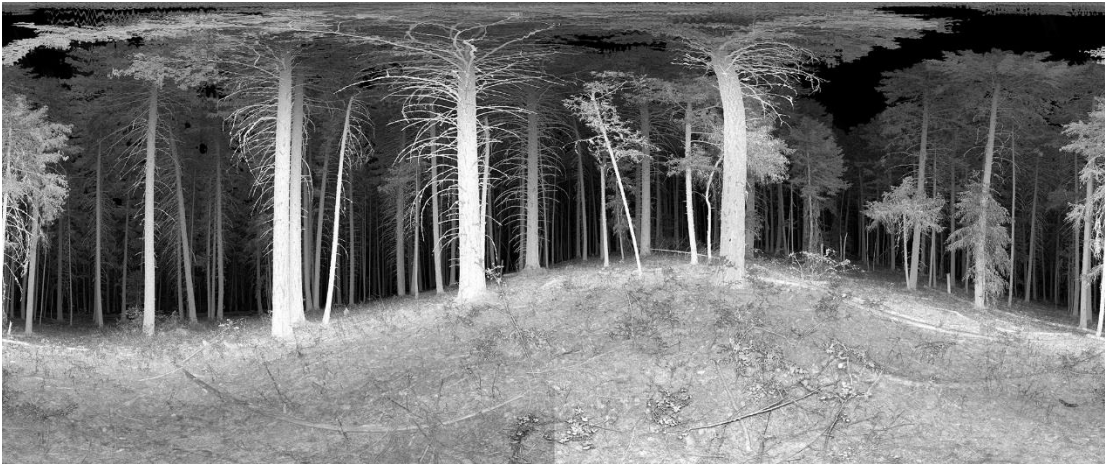

| Scan #/ Plot # / Date / Time  | UTM (NAD 83)        | Aspect / Degree / TT | LiDDI / BA (m <sup>2</sup> /ha) / DBH V (cm) |
|-------------------------------|---------------------|----------------------|----------------------------------------------|
| 001 / ML9 / 09-30-2014 / 1230 | 10T 0622461 5037978 | 155° / 13° / 4m 345° | 3.9 / 68 / 169                               |

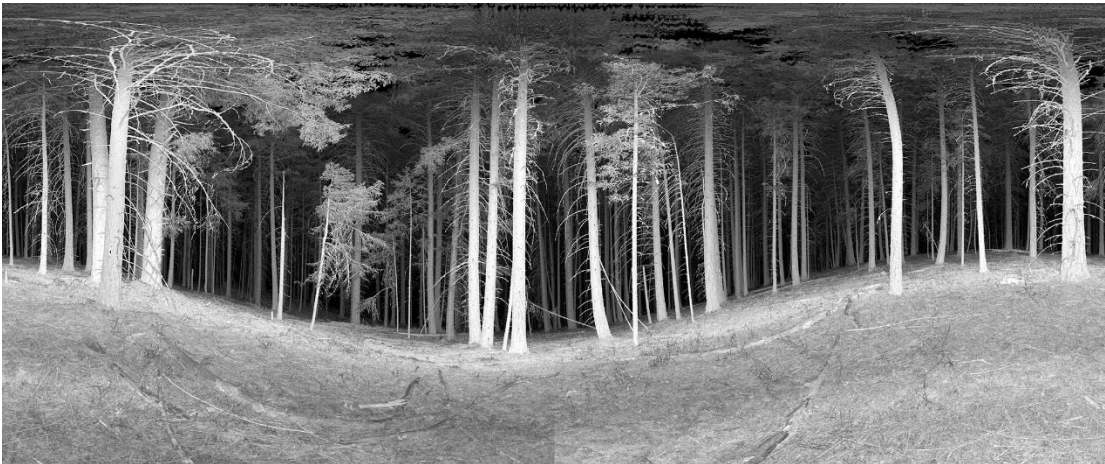

| Scan #/ Plot # / Date / Time  | UTM (NAD 83)        | Aspect / Degree / TT | LiDDI / BA (m <sup>2</sup> /ha) / DBH V (cm) |
|-------------------------------|---------------------|----------------------|----------------------------------------------|
| 002 / ML6 / 09-30-2014 / 1300 | 10T 0622437 5038069 | 180° / - / 4m 35°    | 3.9 / 89 / 142                               |

| Name            | EcoRegion     | Ecological Systems Description                                |
|-----------------|---------------|---------------------------------------------------------------|
| Mill Creek (ML) | East Cascades | East Cascades Mesic Montane Mixed-Conifer Forest and Woodland |

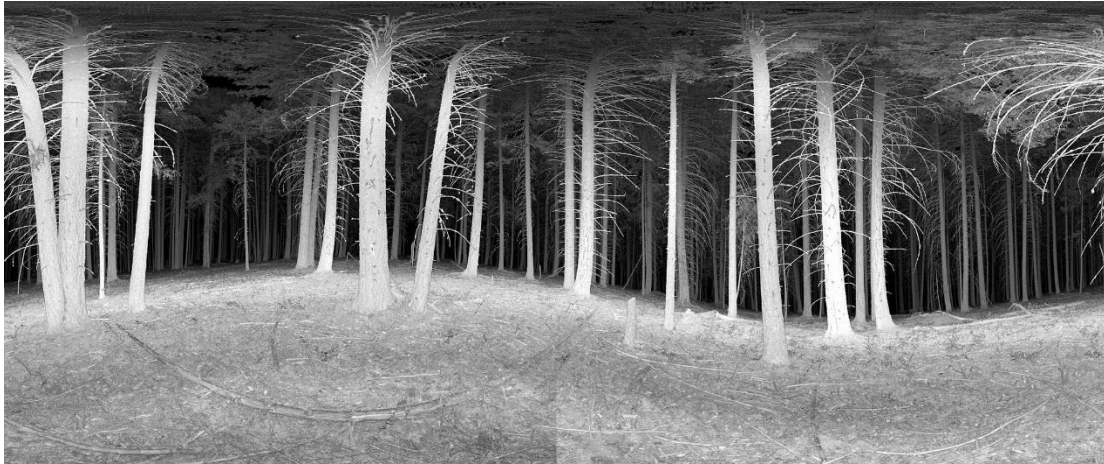

| Scan #/ Plot # / Date / Time  | UTM (NAD 83)        | Aspect / Degree / TT | LiDDI / BA (m <sup>2</sup> /ha) / DBH V (cm) |
|-------------------------------|---------------------|----------------------|----------------------------------------------|
| 003 / ML5 / 09-30-2014 / 1325 | 10T 0622331 5038049 | 170° / 10° / 3m 10°  | 3.0 / 82 / 131                               |

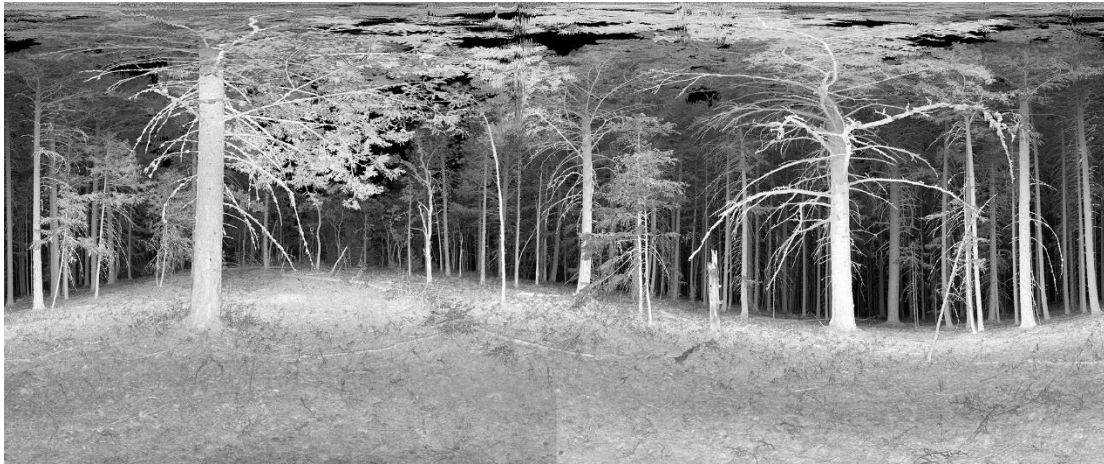

| Scan #/ Plot # / Date / Time  | UTM (NAD 83)        | Aspect / Degree / TT | LiDDI / BA (m <sup>2</sup> /ha) / DBH V (cm) |
|-------------------------------|---------------------|----------------------|----------------------------------------------|
| 004 / ML3 / 09-30-2014 / 1350 | 10T 0622410 5038167 | 150° / 15° / 3m 290° | 5.7 / 83 / 170                               |

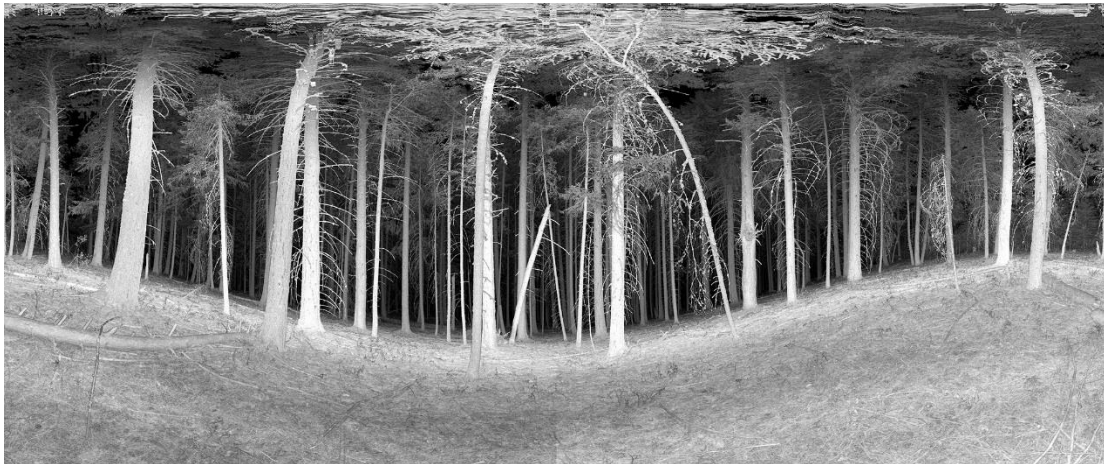

| Scan #/ Plot # / Date / Time  | UTM (NAD 83)        | Aspect / Degree / TT | LiDDI / BA (m <sup>2</sup> /ha) / DBH V (cm) |
|-------------------------------|---------------------|----------------------|----------------------------------------------|
| 005 / ML2 / 09-30-2014 / 1420 | 10T 0622314 5038133 | 180° / 15° / 3m 95°  | 3.0 / 93 / 125                               |

| Name            | EcoRegion     | Ecological Systems Description                                |
|-----------------|---------------|---------------------------------------------------------------|
| Mill Creek (ML) | East Cascades | East Cascades Mesic Montane Mixed-Conifer Forest and Woodland |

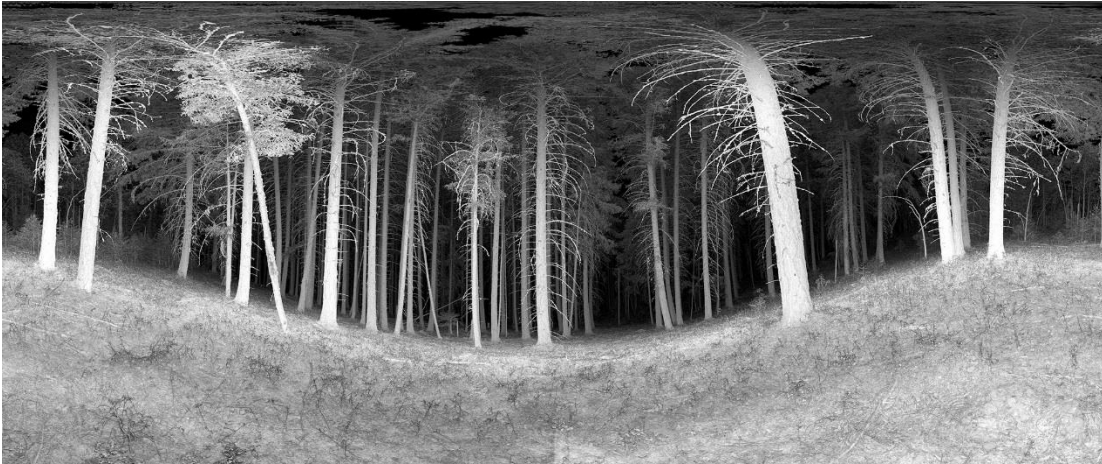

| Scan #/ Plot # / Date / Time  | UTM (NAD 83)        | Aspect / Degree / TT | LiDDI / BA (m <sup>2</sup> /ha) / DBH V (cm) |
|-------------------------------|---------------------|----------------------|----------------------------------------------|
| 006 / ML1 / 09-30-2014 / 1500 | 10T 0622212 5038103 | 155° / 17° / 3m 245° | 3.9 / 80 / 115                               |

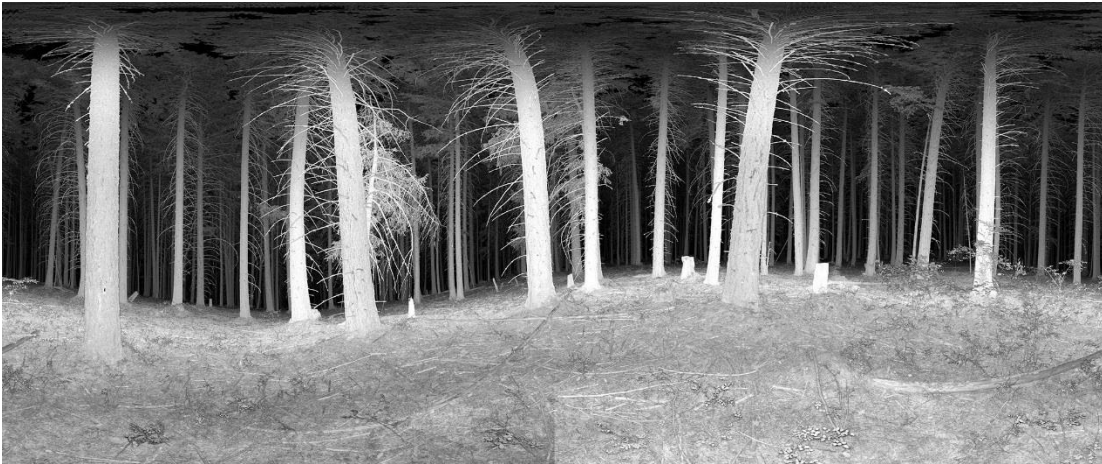

| Scan #/ Plot # / Date / Time  | UTM (NAD 83)        | Aspect / Degree / TT | LiDDI / BA (m <sup>2</sup> /ha) / DBH V (cm) |
|-------------------------------|---------------------|----------------------|----------------------------------------------|
| 007 / ML4 / 09-30-2014 / 1530 | 10T 0622246 5038020 | 155° / 10° / 3m 70°  | 2.8 / 110 / 110                              |

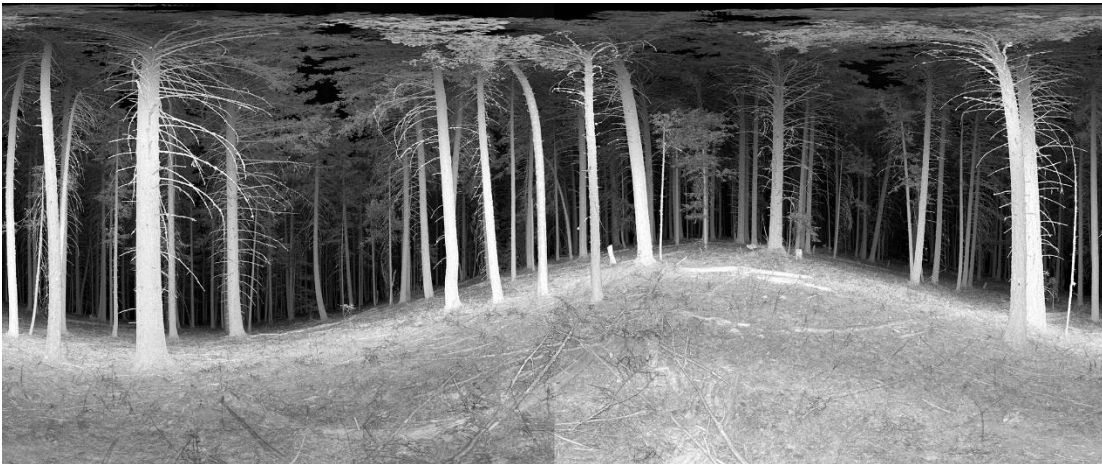

| Scan #/ Plot # / Date / Time  | UTM (NAD 83)        | Aspect / Degree / TT | LiDDI / BA (m <sup>2</sup> /ha) / DBH V (cm) |
|-------------------------------|---------------------|----------------------|----------------------------------------------|
| 008 / ML7 / 09-30-2014 / 1600 | 10T 0622265 5037922 | 150° / 14° / 4m 40°  | 3.9 / 80 / 106                               |

| Name             | EcoRegion   | Ecological Systems Description                                      |
|------------------|-------------|---------------------------------------------------------------------|
| Mary's Peak (MP) | Coast Range | North Pacific Maritime Dry-Mesic Douglas-fir-Western Hemlock Forest |

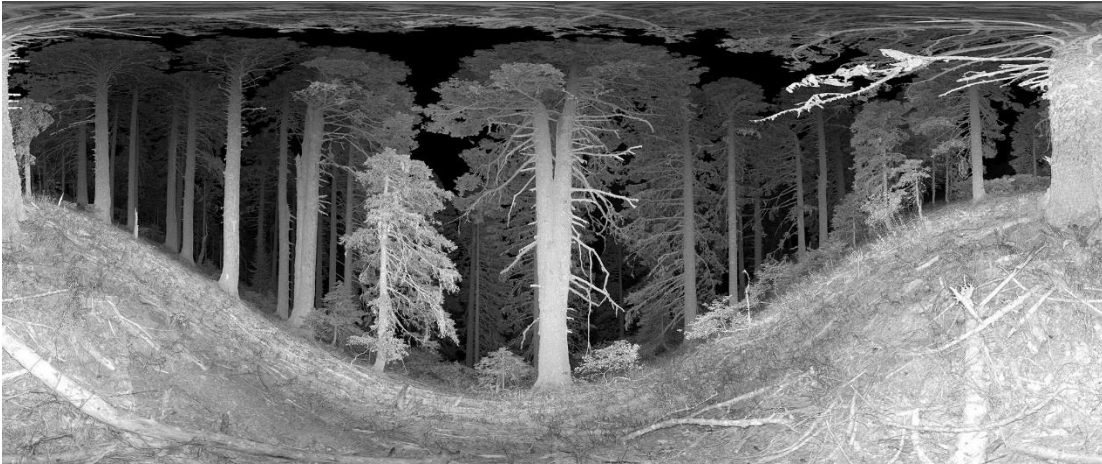

| Scan #/ Plot # / Date / Time  | UTM (NAD 83)        | Aspect / Degree / TT | LiDDI / BA (m <sup>2</sup> /ha) / DBH V (cm) |
|-------------------------------|---------------------|----------------------|----------------------------------------------|
| 000 / MP1 / 10-09-2014 / 1050 | 10T 0456324 4928114 | 115° / 31° / 3m 305° | 5.4 / 131 / 913                              |

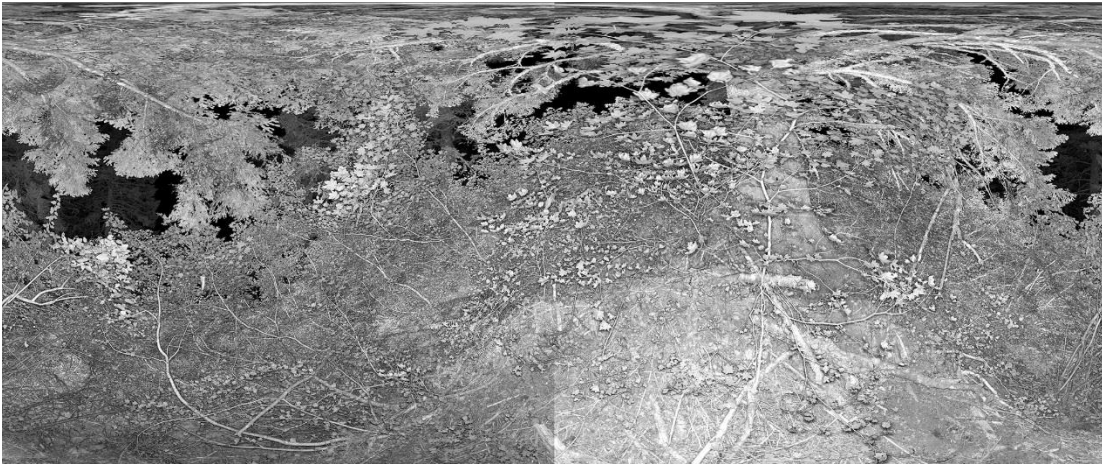

| Scan #/ Plot # / Date / Time  | UTM (NAD 83)        | Aspect / Degree / TT | LiDDI / BA (m <sup>2</sup> /ha) / DBH V (cm) |
|-------------------------------|---------------------|----------------------|----------------------------------------------|
| 001 / MP4 / 10-09-2014 / 1120 | 10T 0456348 4928004 | 95° / 29° / 4m 300°  | 2.6 / 44 / 685                               |

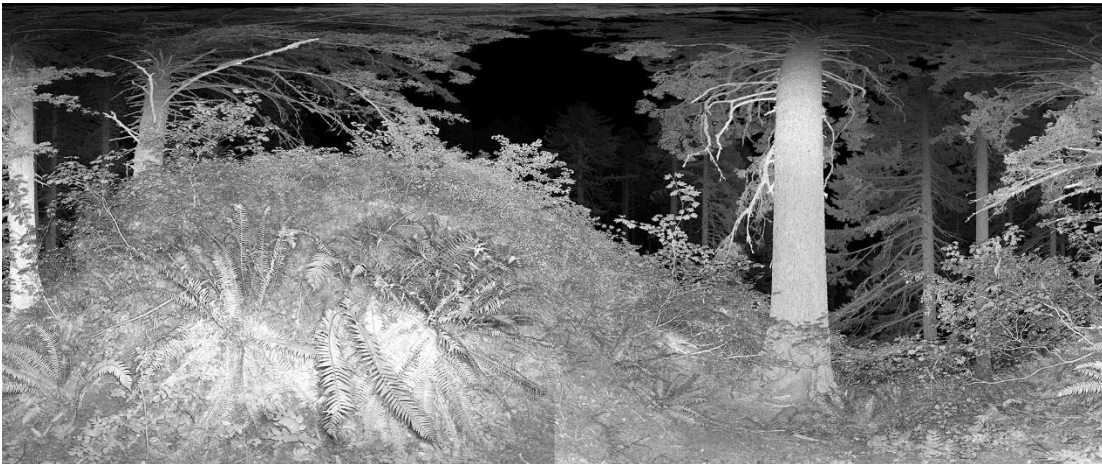

| Scan #/ Plot # / Date / Time  | UTM (NAD 83)        | Aspect / Degree / TT | LiDDI / BA (m <sup>2</sup> /ha) / DBH V (cm) |
|-------------------------------|---------------------|----------------------|----------------------------------------------|
| 002 / MP7 / 10-09-2014 / 1200 | 10T 0456385 4927904 | 120° / 30° / 4m 260° | 4.1 / 70 / 1125                              |

| Name             | EcoRegion   | Ecological Systems Description                                      |
|------------------|-------------|---------------------------------------------------------------------|
| Mary's Peak (MP) | Coast Range | North Pacific Maritime Dry-Mesic Douglas-fir-Western Hemlock Forest |

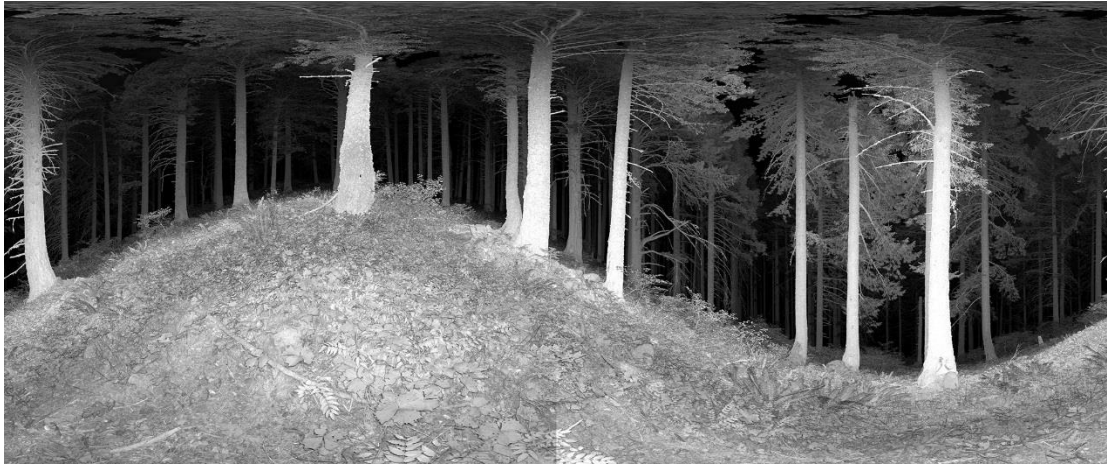

| Scan #/ Plot # / Date / Time  | UTM (NAD 83)        | Aspect / Degree / TT | LiDDI / BA (m <sup>2</sup> /ha) / DBH V (cm) |
|-------------------------------|---------------------|----------------------|----------------------------------------------|
| 003 / MP8 / 10-09-2014 / 1240 | 10T 0456488 4927937 | 105° / 30° / 5m 295° | 5.1 / 80 / 142                               |

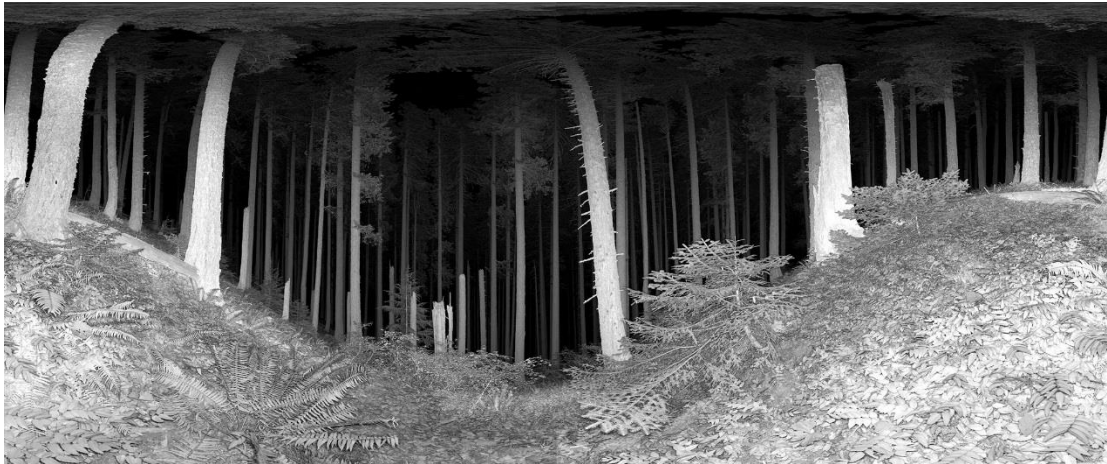

| Scan #/ Plot # / Date / Time  | UTM (NAD 83)        | Aspect / Degree / TT | LiDDI / BA (m <sup>2</sup> /ha) / DBH V (cm) |
|-------------------------------|---------------------|----------------------|----------------------------------------------|
| 004 / MP9 / 10-09-2014 / 1310 | 10T 0456580 4927981 | 105° / 33° / 4m 300° | 5.4 / 187 / 208                              |

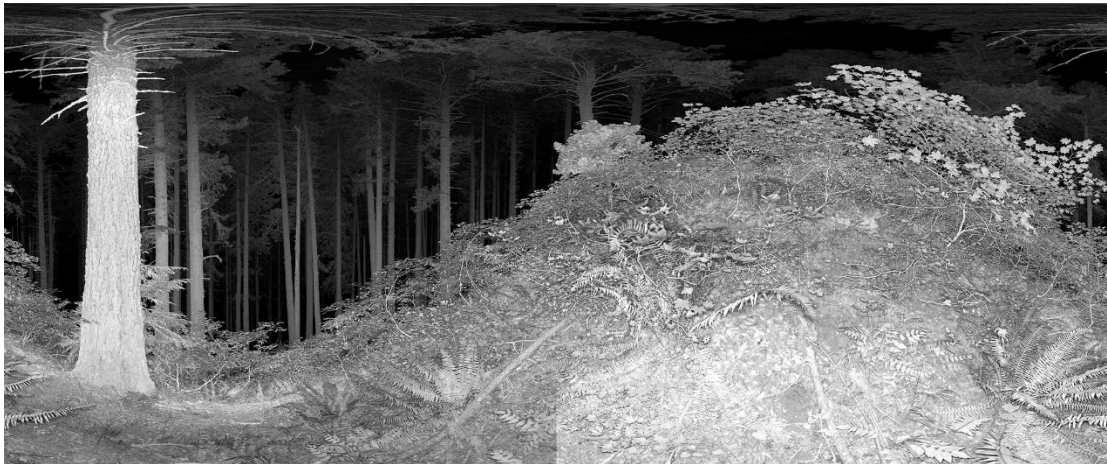

| Scan #/ Plot # / Date / Time  | UTM (NAD 83)        | Aspect / Degree / TT | LiDDI / BA (m <sup>2</sup> /ha) / DBH V (cm) |
|-------------------------------|---------------------|----------------------|----------------------------------------------|
| 005 / MP6 / 10-09-2014 / 1340 | 10T 0456554 4928055 | 105° / 32° / 4m 90°  | 3.3 / 57 / 2062                              |

| Name             | EcoRegion   | Ecological Systems Description                                      |
|------------------|-------------|---------------------------------------------------------------------|
| Mary's Peak (MP) | Coast Range | North Pacific Maritime Dry-Mesic Douglas-fir-Western Hemlock Forest |

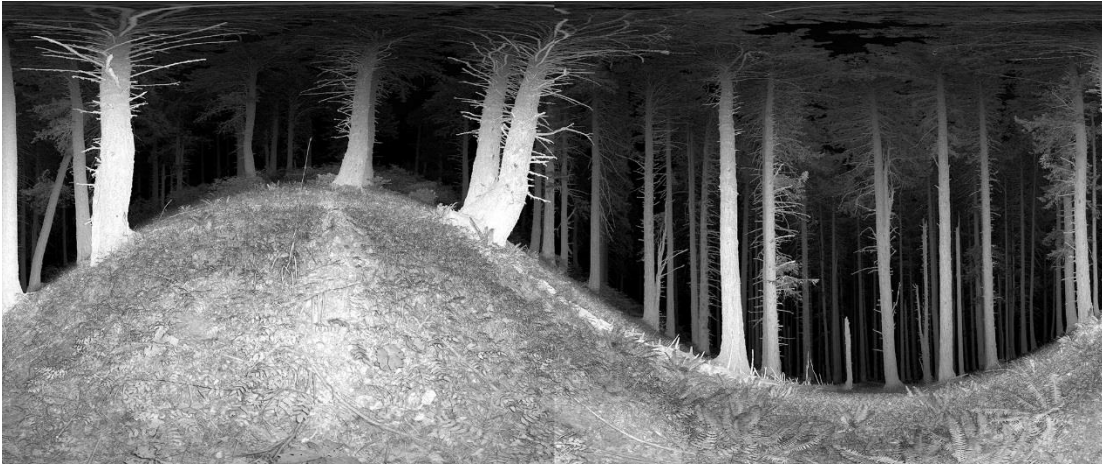

| Scan #/ Plot # / Date / Time  | UTM (NAD 83)        | Aspect / Degree / TT | LiDDI / BA (m <sup>2</sup> /ha) / DBH V (cm) |
|-------------------------------|---------------------|----------------------|----------------------------------------------|
| 006 / MP5 / 10-09-2014 / 1410 | 10T 0456452 4928040 | 120° / 33° / 7m 240° | 6.7 / 207 / 580                              |

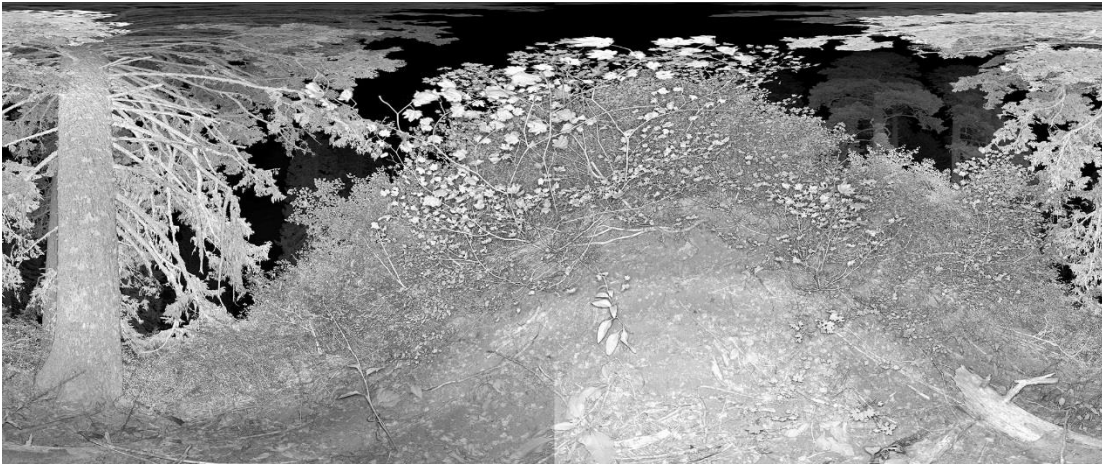

| Scan #/ Plot # / Date / Time  | UTM (NAD 83)        | Aspect / Degree / TT | LiDDI / BA (m <sup>2</sup> /ha) / DBH V (cm) |
|-------------------------------|---------------------|----------------------|----------------------------------------------|
| 007 / MP3 / 10-09-2014 / 1450 | 10T 0456516 4928164 | 120° / 60° / 3m 110° | 4.0 / 81 / 67                                |

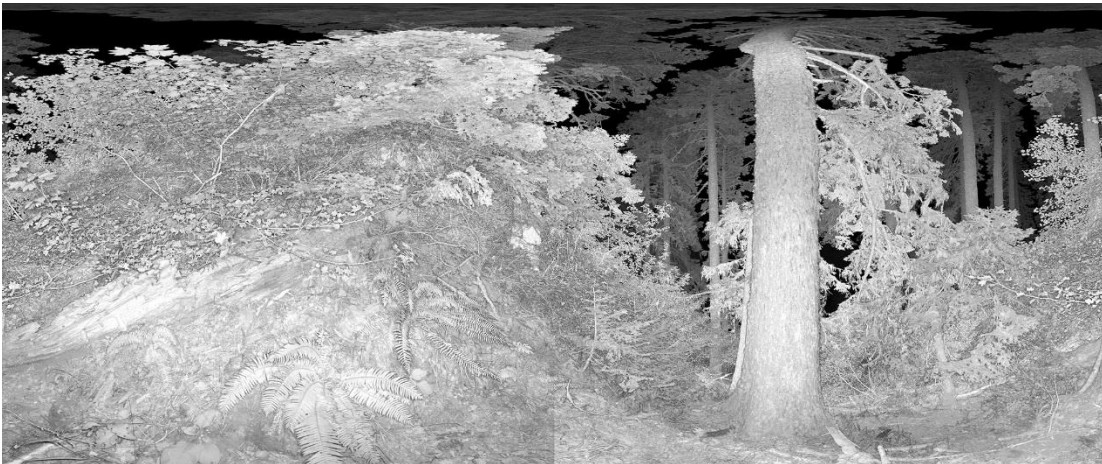

| Scan #/ Plot # / Date / Time  | UTM (NAD 83)        | Aspect / Degree / TT | LiDDI / BA (m <sup>2</sup> /ha) / DBH V (cm) |
|-------------------------------|---------------------|----------------------|----------------------------------------------|
| 008 / MP2 / 10-09-2014 / 1550 | 10T 0456439 4928169 | 110° / 34° / 2m 80°  | 2.4 / 56 / 425                               |

| Name            | EcoRegion         | Ecological Systems Description |
|-----------------|-------------------|--------------------------------|
| North Bank (NB) | Klamath Mountains | North Pacific Oak Woodland     |

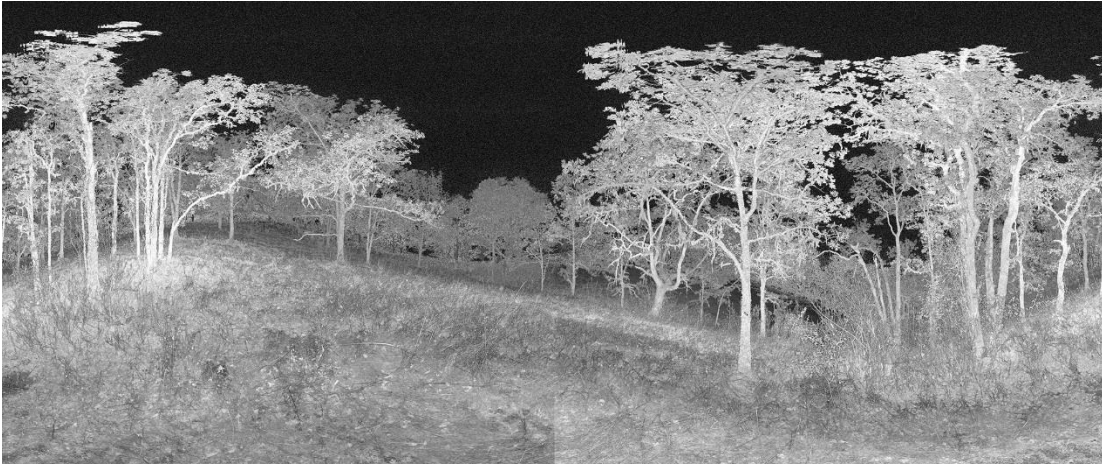

| Scan #/ Plot # / Date / Time  | UTM (NAD 83)        | Aspect / Degree / TT | LiDDI / BA (m <sup>2</sup> /ha) / DBH V (cm) |
|-------------------------------|---------------------|----------------------|----------------------------------------------|
| 000 / NB2 / 09-05-2014 / 1430 | 10T 0480064 4796553 | 160° / 14° / 4m 75°  | 1.3 / 13 / 18                                |

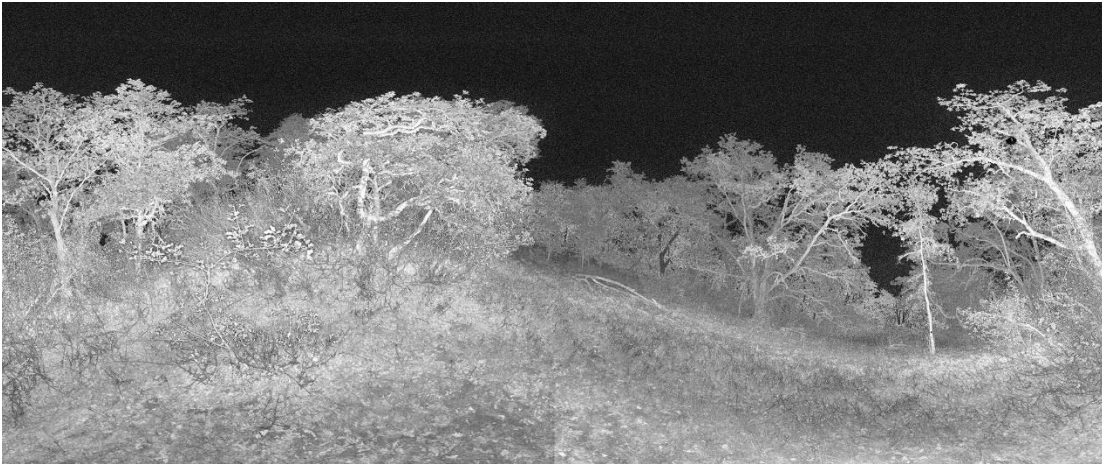

| Scan #/ Plot # / Date / Time  | UTM (NAD 83)        | Aspect / Degree / TT | LiDDI / BA (m <sup>2</sup> /ha) / DBH V (cm) |
|-------------------------------|---------------------|----------------------|----------------------------------------------|
| 001 / NB3 / 09-05-2014 / 1510 | 10T 0480158 4796571 | 220° / 23° / 9m 200° | 0.8 / 2 / 24                                 |

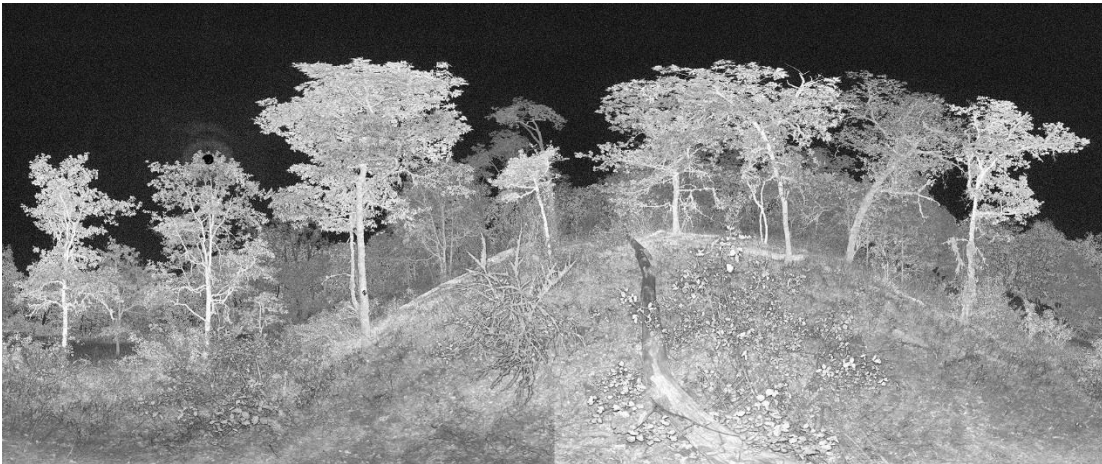

| Scan #/ Plot # / Date / Time  | UTM (NAD 83)        | Aspect / Degree / TT | LiDDI / BA (m <sup>2</sup> /ha) / DBH V (cm) |
|-------------------------------|---------------------|----------------------|----------------------------------------------|
| 002 / NB6 / 09-05-2014 / 1550 | 10T 0480187 4796474 | 200° / 14° / 4m 295° | 1.7 / 8 / 21                                 |

| Name            | EcoRegion         | Ecological Systems Description |
|-----------------|-------------------|--------------------------------|
| North Bank (NB) | Klamath Mountains | North Pacific Oak Woodland     |

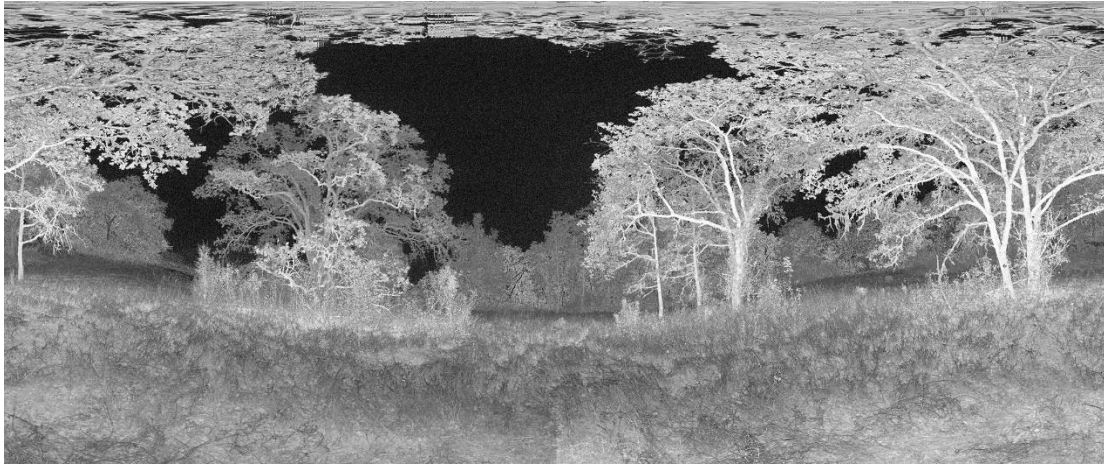

| Scan #/ Plot # / Date / Time  | UTM (NAD 83)        | Aspect / Degree / TT | LiDDI / BA (m <sup>2</sup> /ha) / DBH V (cm) |
|-------------------------------|---------------------|----------------------|----------------------------------------------|
| 006 / NB5 / 09-05-2014 / 1750 | 10T 0480093 4796454 | 145° / 12° / 4m 245° | 2.5 / 15 / 41                                |

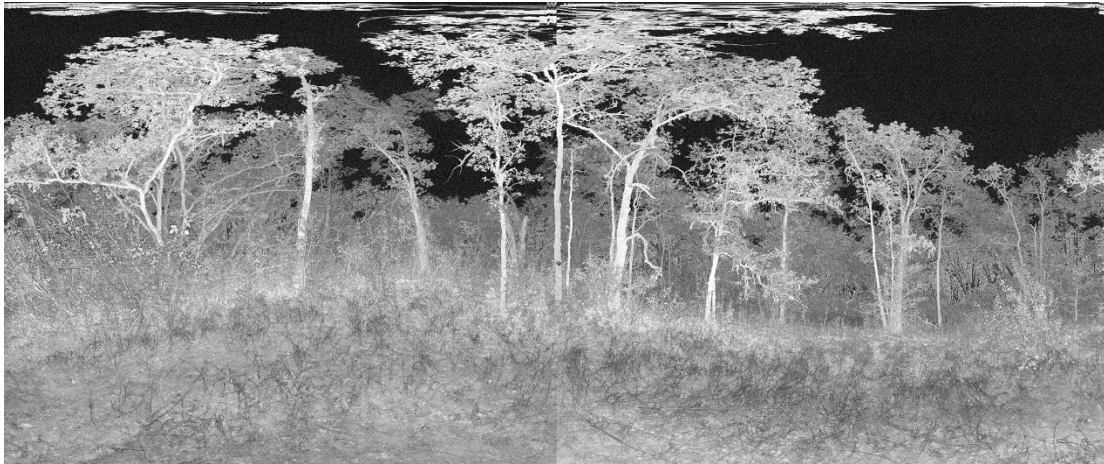

| Scan #/ Plot # / Date / Time  | UTM (NAD 83)        | Aspect / Degree / TT | LiDDI / BA (m <sup>2</sup> /ha) / DBH V (cm) |
|-------------------------------|---------------------|----------------------|----------------------------------------------|
| 003 / NB9 / 09-05-2014 / 1620 | 10T 0480198 4796391 | 200° / 22° / 6m 360° | 1.9 / 3 / 4                                  |

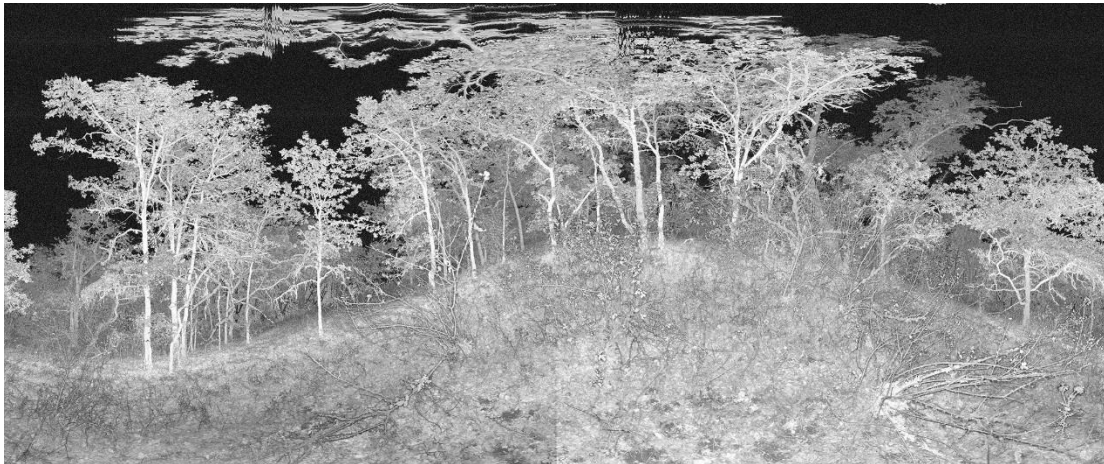

| Scan #/ Plot # / Date / Time  | UTM (NAD 83)        | Aspect / Degree / TT | LiDDI / BA (m <sup>2</sup> /ha) / DBH V (cm) |
|-------------------------------|---------------------|----------------------|----------------------------------------------|
| 004 / NB8 / 09-05-2014 / 1650 | 10T 0480129 4796362 | 170° / 9° / 5m 20°   | 3.0 / 18 / 59                                |

| Name            | EcoRegion         | Ecological Systems Description |
|-----------------|-------------------|--------------------------------|
| North Bank (NB) | Klamath Mountains | North Pacific Oak Woodland     |

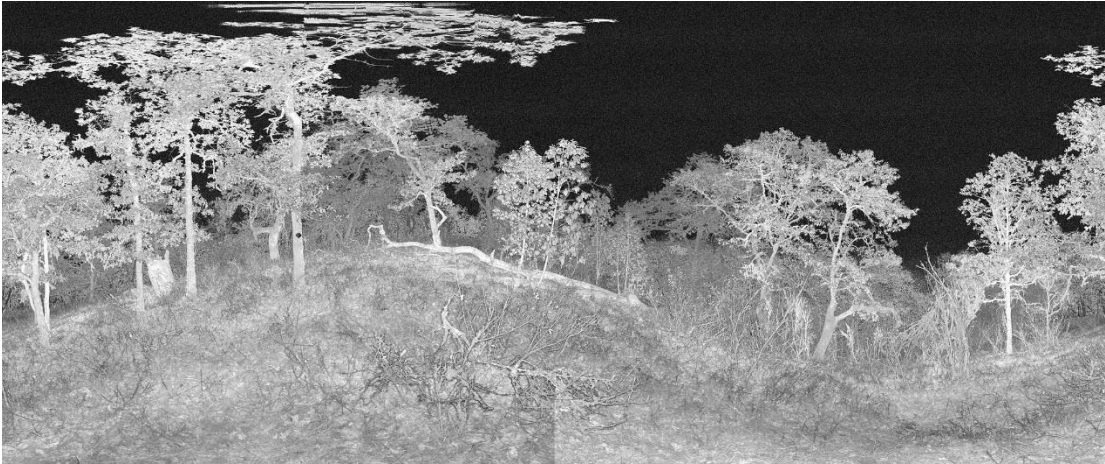

| Scan #/ Plot # / Date / Time  | UTM (NAD 83)        | Aspect / Degree / TT | LiDDI / BA (m <sup>2</sup> /ha) / DBH V (cm) |
|-------------------------------|---------------------|----------------------|----------------------------------------------|
| 005 / NB7 / 09-05-2014 / 1720 | 10T 0480024 4796322 | 90° / 24° / 6m 90°   | 1.4 / 9 / 12                                 |

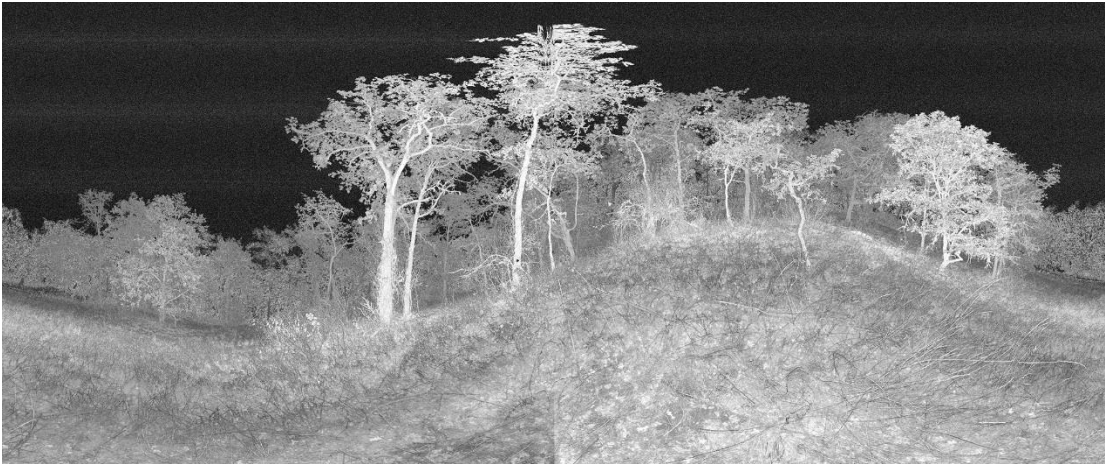

| Scan #/ Plot # / Date / Time  | UTM (NAD 83)        | Aspect / Degree / TT | LiDDI / BA (m <sup>2</sup> /ha) / DBH V (cm) |
|-------------------------------|---------------------|----------------------|----------------------------------------------|
| 007 / NB4 / 09-05-2014 / 1820 | 10T 0479995 4796420 | 105° / 15° / 5m 190° | 2.3 / 12 / 37                                |

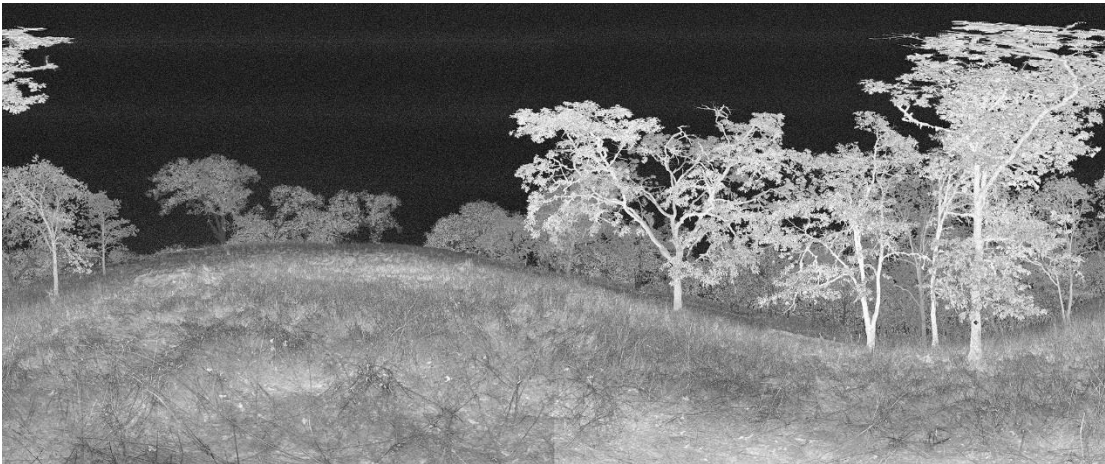

| Scan #/ Plot # / Date / Time  | UTM (NAD 83)        | Aspect / Degree / TT | LiDDI / BA (m <sup>2</sup> /ha) / DBH V (cm) |
|-------------------------------|---------------------|----------------------|----------------------------------------------|
| 008 / NB1 / 09-05-2014 / 1900 | 10T 0479963 4796514 | 130° / 18° / 4m 140° | 2.7 / 10 / 30                                |

| Name           | EcoRegion   | Ecological Systems Description                  |
|----------------|-------------|-------------------------------------------------|
| New River (NR) | Coast Range | North Pacific Hypermaritime Sitka Spruce Forest |

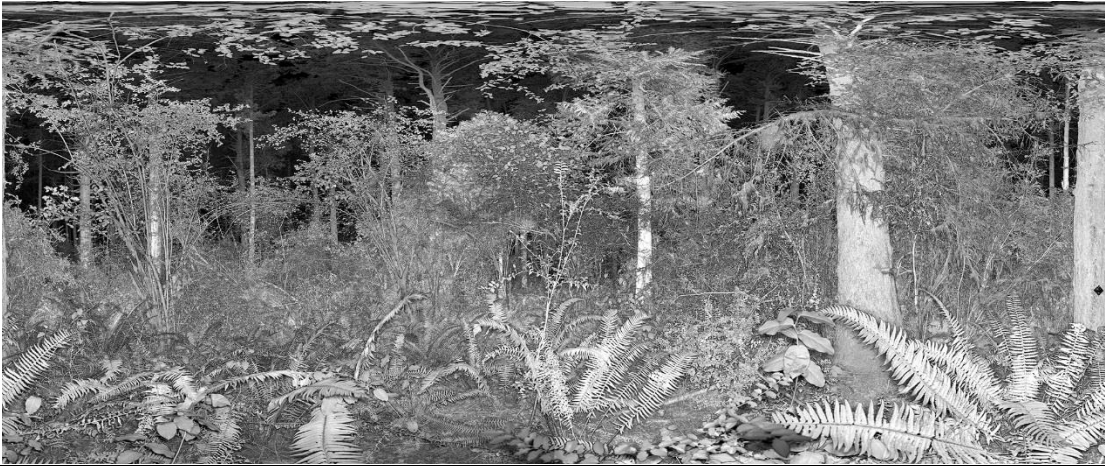

| Scan #/ Plot # / Date / Time  | UTM (NAD 83)        | Aspect / Degree / TT | LiDDI / BA (m <sup>2</sup> /ha) / DBH V (cm) |
|-------------------------------|---------------------|----------------------|----------------------------------------------|
| 000 / NR5 / 09-20-2014 / 1020 | 10T 0383248 4764380 | - / - / 3m 190°      | 2.3 / 45 / 215                               |

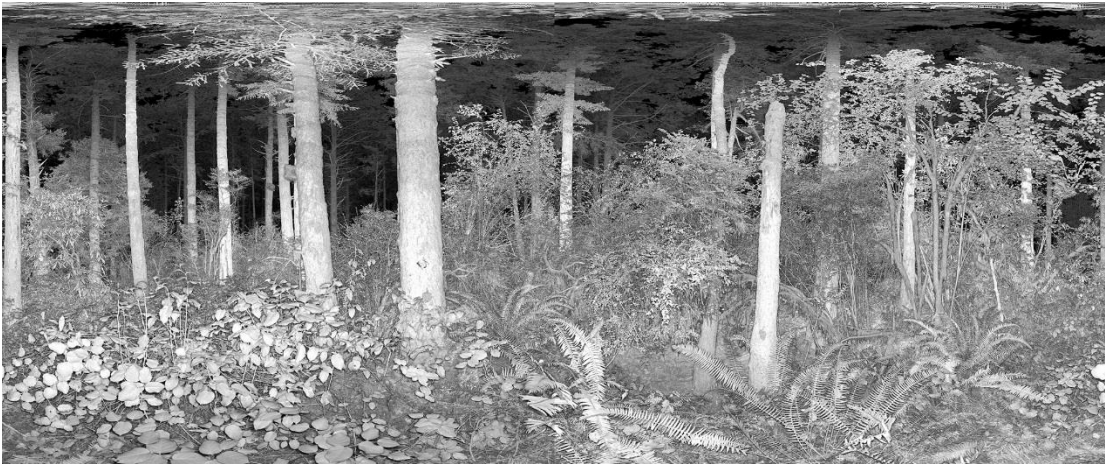

| Scan #/ Plot # / Date / Time  | UTM (NAD 83)        | Aspect / Degree / TT | LiDDI / BA (m <sup>2</sup> /ha) / DBH V (cm) |
|-------------------------------|---------------------|----------------------|----------------------------------------------|
| 001 / NR6 / 09-20-2014 / 1050 | 10T 0383347 4764363 | - / - / 2m 175°      | 3.0 / 34 / 86                                |

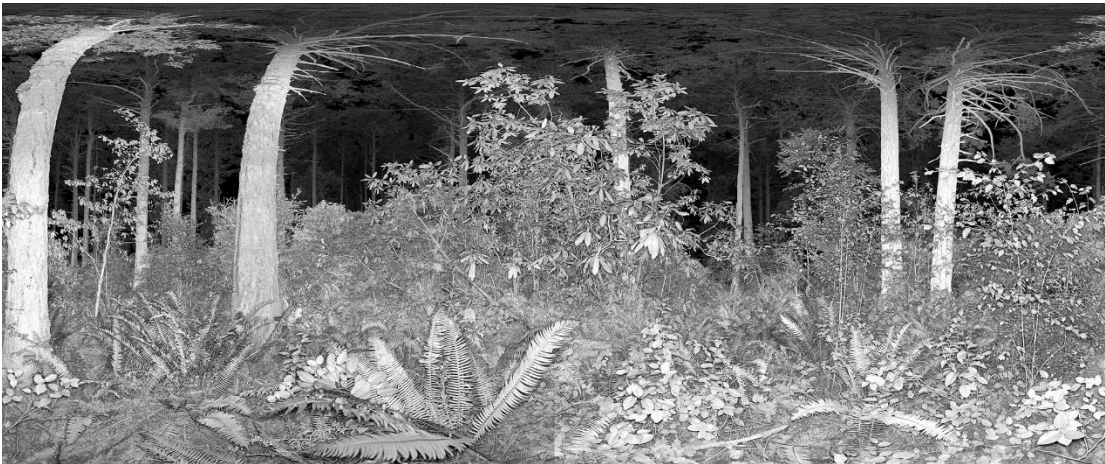

| Scan #/ Plot # / Date / Time  | UTM (NAD 83)        | Aspect / Degree / TT | LiDDI / BA (m <sup>2</sup> /ha) / DBH V (cm) |
|-------------------------------|---------------------|----------------------|----------------------------------------------|
| 002 / NR3 / 09-20-2014 / 1205 | 10T 0383331 4764470 | - / - / 2m 20°       | 3.0 / 60 / 183                               |

| Name           | EcoRegion   | Ecological Systems Description                  |
|----------------|-------------|-------------------------------------------------|
| New River (NR) | Coast Range | North Pacific Hypermaritime Sitka Spruce Forest |

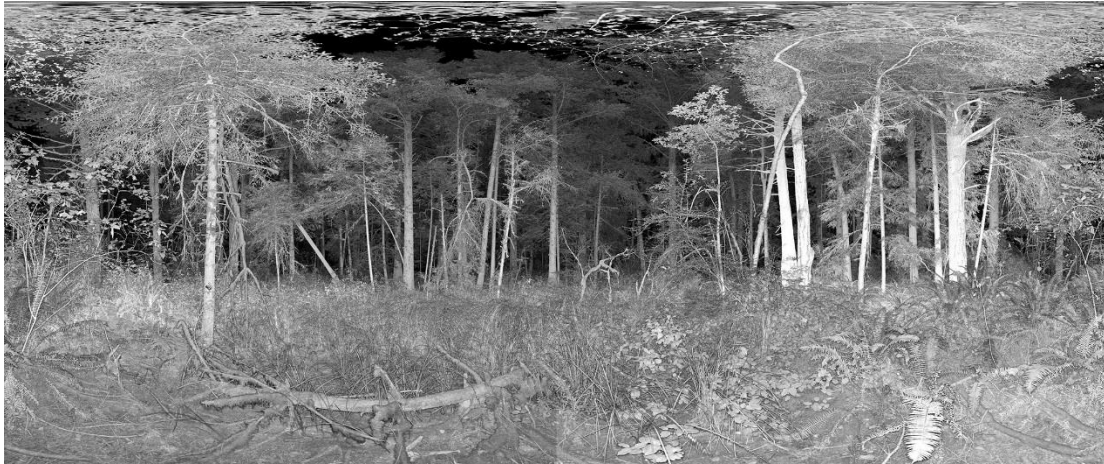

| Scan #/ Plot # / Date / Time  | UTM (NAD 83)        | Aspect / Degree / TT | LiDDI / BA (m <sup>2</sup> /ha) / DBH V (cm) |
|-------------------------------|---------------------|----------------------|----------------------------------------------|
| 003 / NR2 / 09-20-2014 / 1235 | 10T 0383251 4764473 | - / - / 3m 320°      | 3.0 / 57 / 147                               |

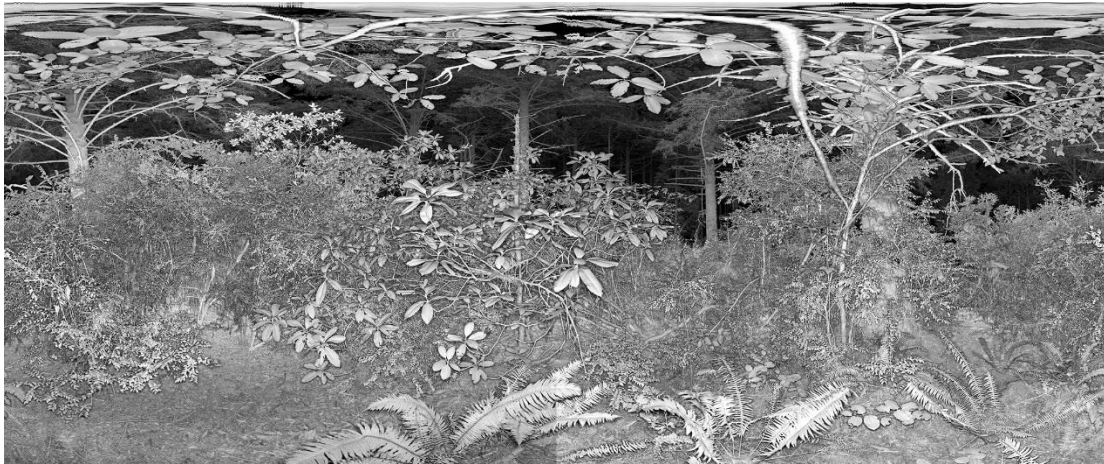

| Scan #/ Plot # / Date / Time  | UTM (NAD 83)        | Aspect / Degree / TT | LiDDI / BA (m <sup>2</sup> /ha) / DBH V (cm) |
|-------------------------------|---------------------|----------------------|----------------------------------------------|
| 004 / NR1 / 09-20-2014 / 1320 | 10T 0383157 4764470 | - / - / 3m 220°      | 1.5 / 17 / 29                                |

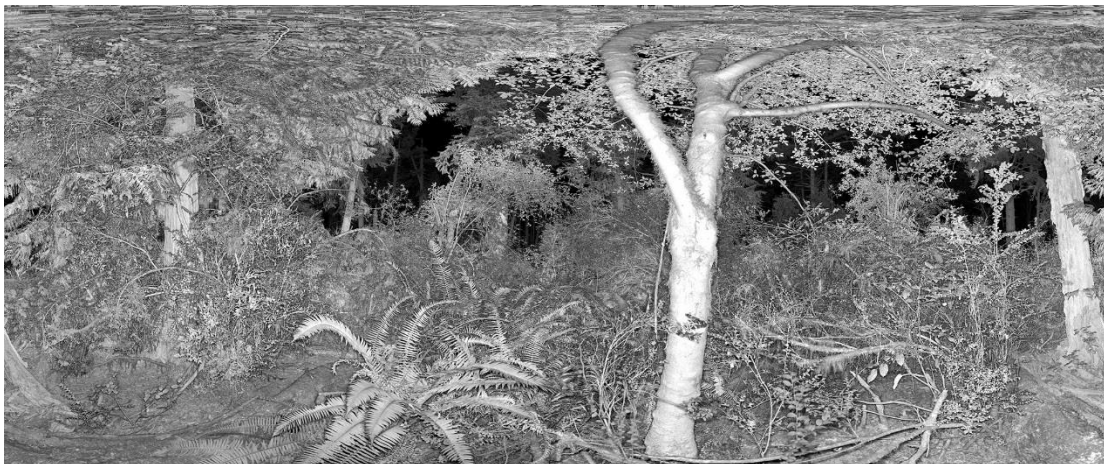

| Scan #/ Plot # / Date / Time  | UTM (NAD 83)        | Aspect / Degree / TT | LiDDI / BA (m <sup>2</sup> /ha) / DBH V (cm) |
|-------------------------------|---------------------|----------------------|----------------------------------------------|
| 005 / NR4 / 09-20-2014 / 1430 | 10T 0383146 4764383 | - / - / 1m 130°      | 1.8 / 9 / 60                                 |

| Name           | EcoRegion   | Ecological Systems Description                  |
|----------------|-------------|-------------------------------------------------|
| New River (NR) | Coast Range | North Pacific Hypermaritime Sitka Spruce Forest |

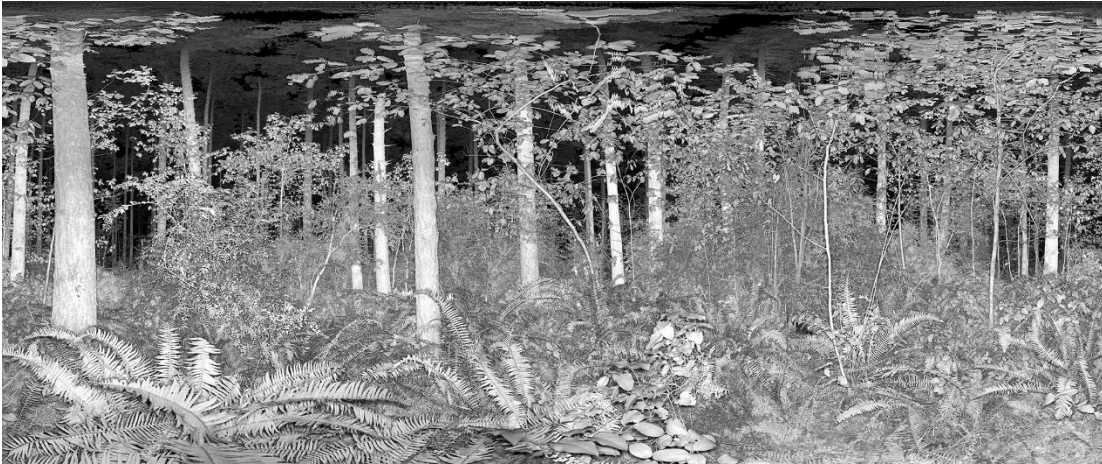

| Scan #/ Plot # / Date / Time  | UTM (NAD 83)        | Aspect / Degree / TT | LiDDI / BA (m <sup>2</sup> /ha) / DBH V (cm) |
|-------------------------------|---------------------|----------------------|----------------------------------------------|
| 006 / NR7 / 09-20-2014 / 1555 | 10T 0383154 4764278 | - / - / 2m 40°       | 3.0 / 43 / 84                                |

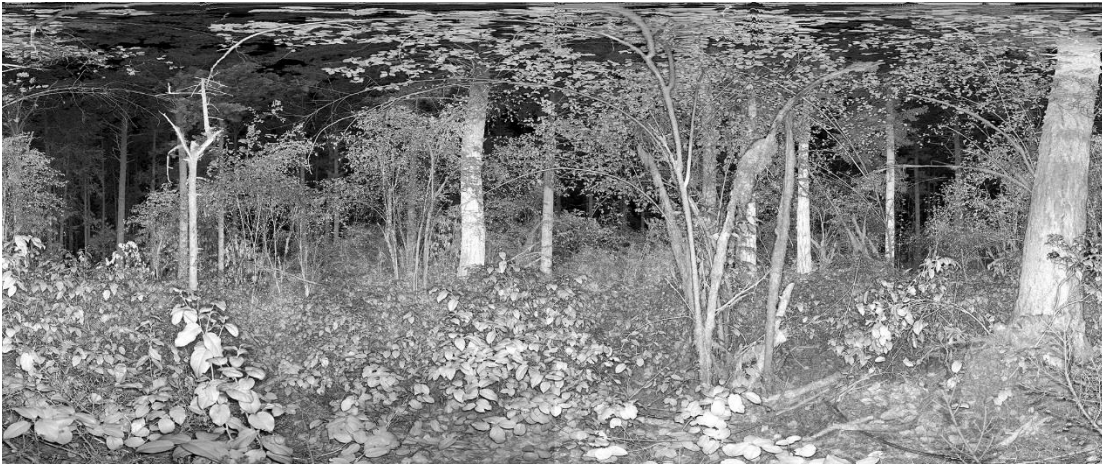

| Scan #/ Plot # / Date / Time  | UTM (NAD 83)        | Aspect / Degree / TT | LiDDI / BA (m <sup>2</sup> /ha) / DBH V (cm) |
|-------------------------------|---------------------|----------------------|----------------------------------------------|
| 007 / NR9 / 09-20-2014 / 1635 | 10T 0383342 4764263 | - / - / 2m 240°      | 3.0 / 56 / 173                               |

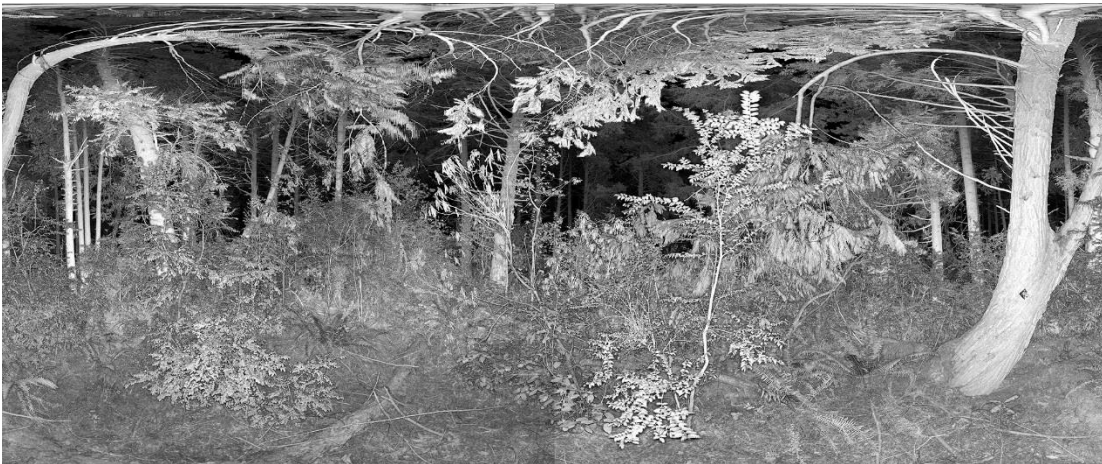

| Scan #/ Plot # / Date / Time  | UTM (NAD 83)        | Aspect / Degree / TT | LiDDI / BA (m <sup>2</sup> /ha) / DBH V (cm) |
|-------------------------------|---------------------|----------------------|----------------------------------------------|
| 008 / NR8 / 09-20-2014 / 1710 | 10T 0383240 4764277 | - / - / 3m 205°      | 3.0 / 67 / 235                               |

| Name            | EcoRegion   | Ecological Systems Description                             |
|-----------------|-------------|------------------------------------------------------------|
| North Spit (NS) | Coast Range | California Coastal Closed-Cone Conifer Forest and Woodland |

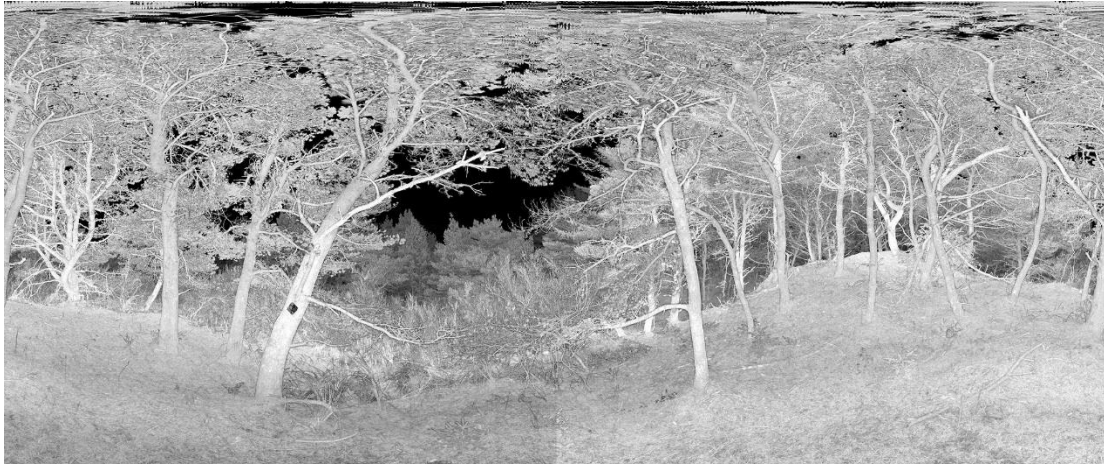

| Scan #/ Plot # / Date / Time  | UTM (NAD 83)        | Aspect / Degree / TT | LiDDI / BA (m <sup>2</sup> /ha) / DBH V (cm) |
|-------------------------------|---------------------|----------------------|----------------------------------------------|
| 000 / NS3 / 09-19-2014 / 1100 | 10T 0394293 4805329 | - / - / 2m 330°      | 3.0 / 28 / 31                                |

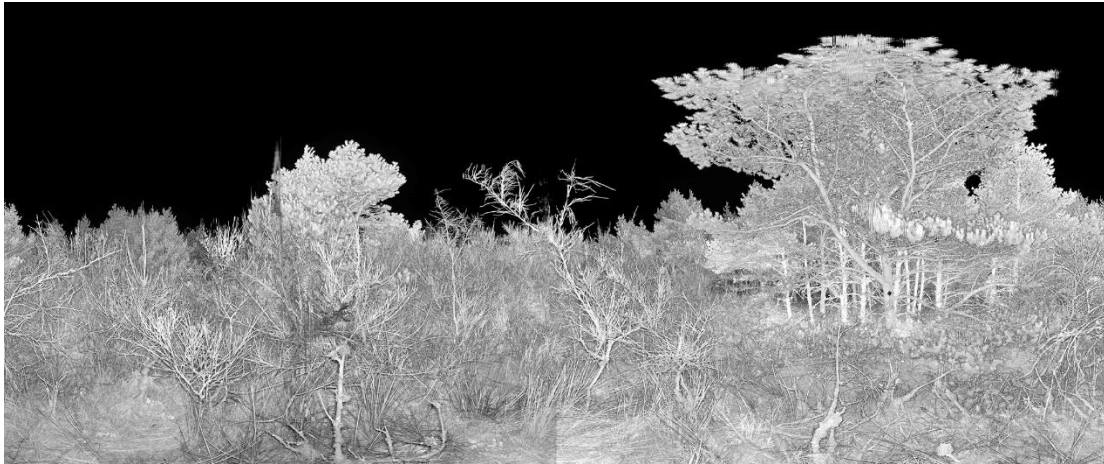

| Scan #/ Plot # / Date / Time  | UTM (NAD 83)        | Aspect / Degree / TT | LiDDI / BA (m <sup>2</sup> /ha) / DBH V (cm) |
|-------------------------------|---------------------|----------------------|----------------------------------------------|
| 001 / NS2 / 09-19-2014 / 1130 | 10T 0394194 4805297 | - / - / 5m 165°      | 1.4 / 9 / 14                                 |

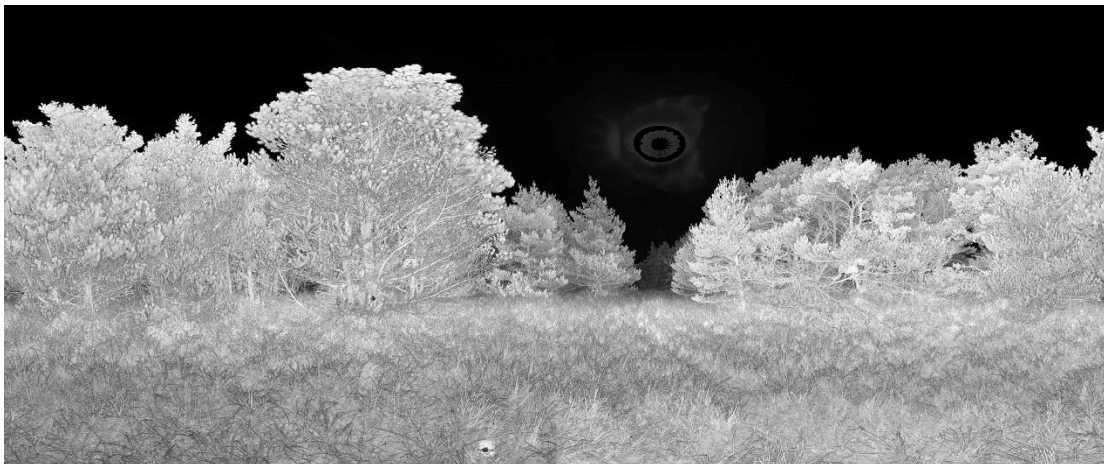

| Scan #/ Plot # / Date / Time  | UTM (NAD 83)        | Aspect / Degree / TT | LiDDI / BA (m <sup>2</sup> /ha) / DBH V (cm) |
|-------------------------------|---------------------|----------------------|----------------------------------------------|
| 002 / NS1 / 09-19-2014 / 1150 | 10T 0394097 4805272 | - / - / 5m 70°       | 1.4 / 4 / 9                                  |

| Name            | EcoRegion   | Ecological Systems Description                             |
|-----------------|-------------|------------------------------------------------------------|
| North Spit (NS) | Coast Range | California Coastal Closed-Cone Conifer Forest and Woodland |

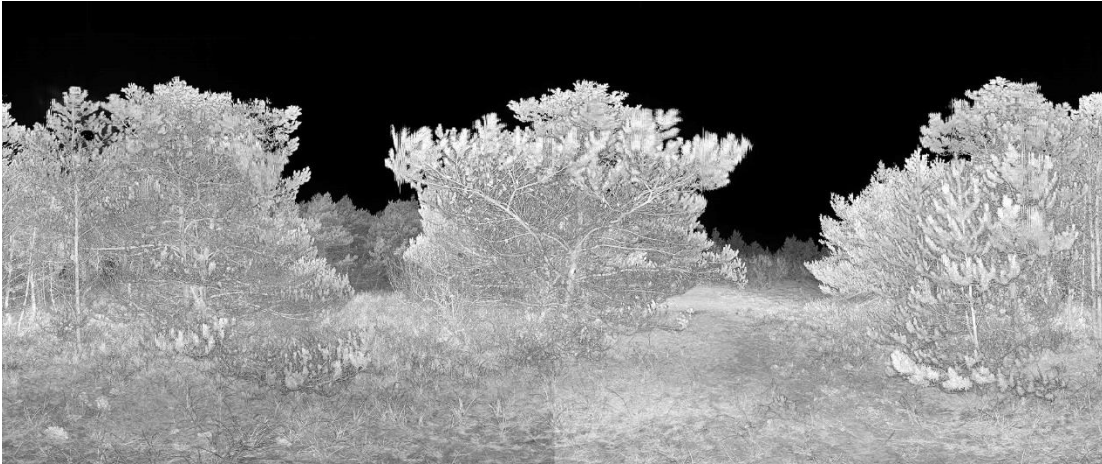

| Scan #/ Plot # / Date / Time  | UTM (NAD 83)        | Aspect / Degree / TT | LiDDI / BA (m <sup>2</sup> /ha) / DBH V (cm) |
|-------------------------------|---------------------|----------------------|----------------------------------------------|
| 003 / NS4 / 09-19-2014 / 1210 | 10T 0394118 4805192 | - / - / 5m 315°      | 1.4 / 3 / 2                                  |

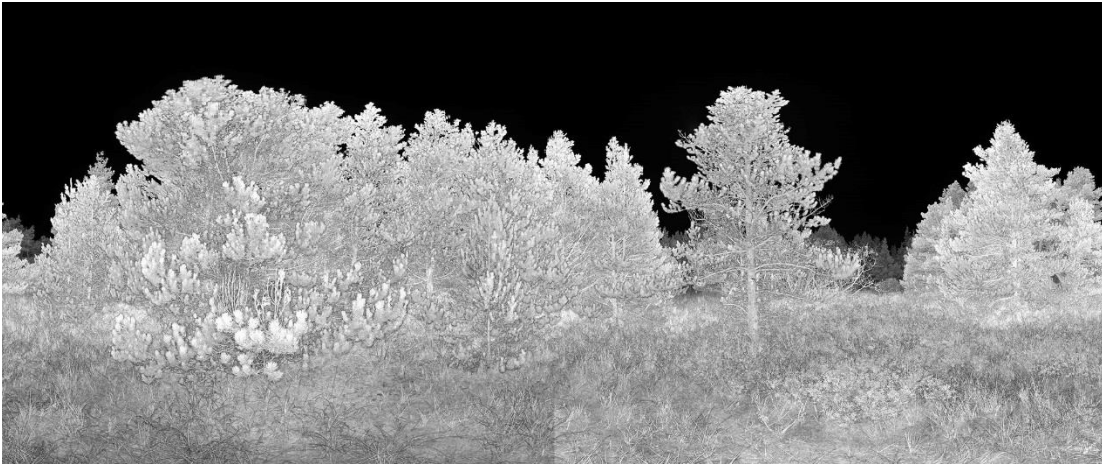

| Scan #/ Plot # / Date / Time  | UTM (NAD 83)        | Aspect / Degree / TT | LiDDI / BA (m <sup>2</sup> /ha) / DBH V (cm) |
|-------------------------------|---------------------|----------------------|----------------------------------------------|
| 004 / NS7 / 09-19-2014 / 1235 | 10T 0394134 4805072 | - / - / 4m 170°      | 1.4 / 4 / 6                                  |

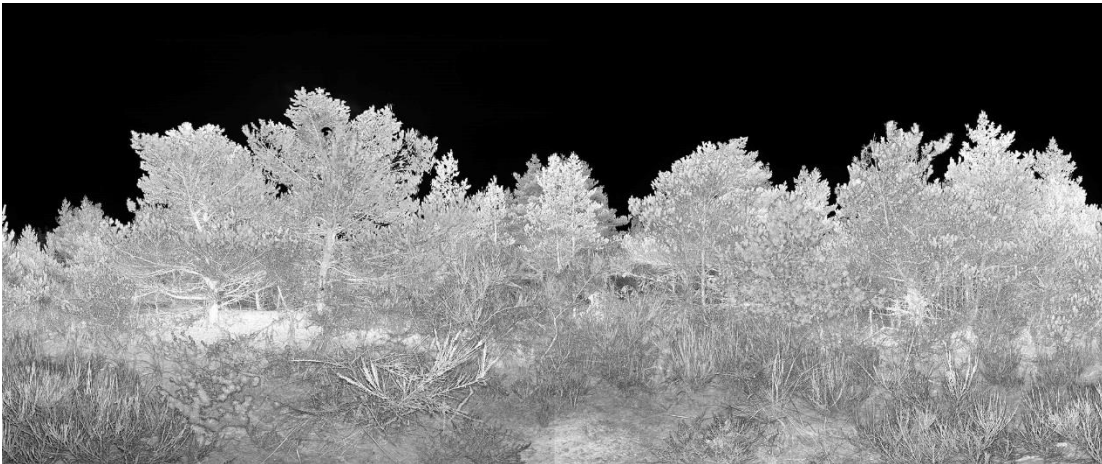

| Scan #/ Plot # / Date / Time  | UTM (NAD 83)        | Aspect / Degree / TT | LiDDI / BA (m <sup>2</sup> /ha) / DBH V (cm) |
|-------------------------------|---------------------|----------------------|----------------------------------------------|
| 005 / NS8 / 09-19-2014 / 1300 | 10T 0394244 4805111 | - / - / 5m 180°      | 1.4 / 4 / 9                                  |

| Name            | EcoRegion   | Ecological Systems Description                             |
|-----------------|-------------|------------------------------------------------------------|
| North Spit (NS) | Coast Range | California Coastal Closed-Cone Conifer Forest and Woodland |

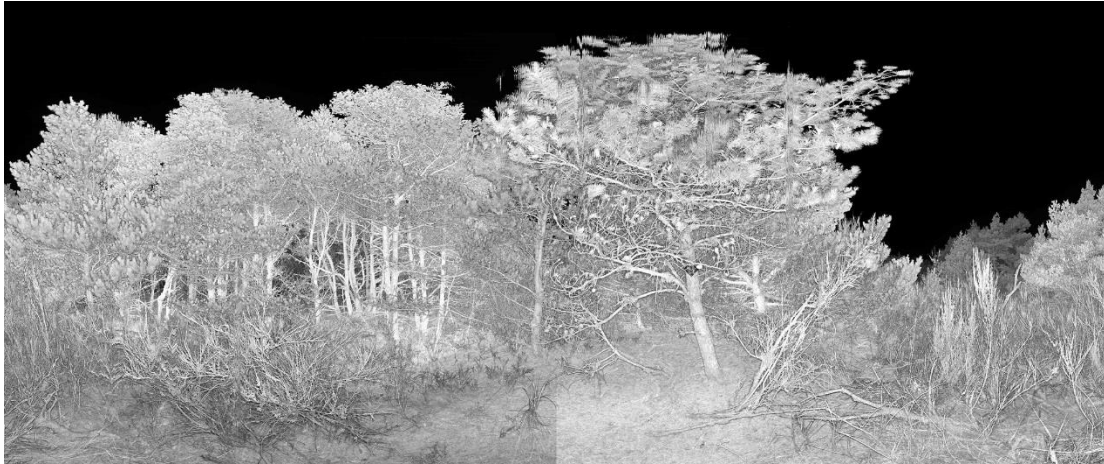

| Scan #/ Plot # / Date / Time  | UTM (NAD 83)        | Aspect / Degree / TT | LiDDI / BA (m <sup>2</sup> /ha) / DBH V (cm) |
|-------------------------------|---------------------|----------------------|----------------------------------------------|
| 006 / NS5 / 09-19-2014 / 1320 | 10T 0394228 4805205 | - / - / 2m 210°      | 1.4 / 19 / 12                                |

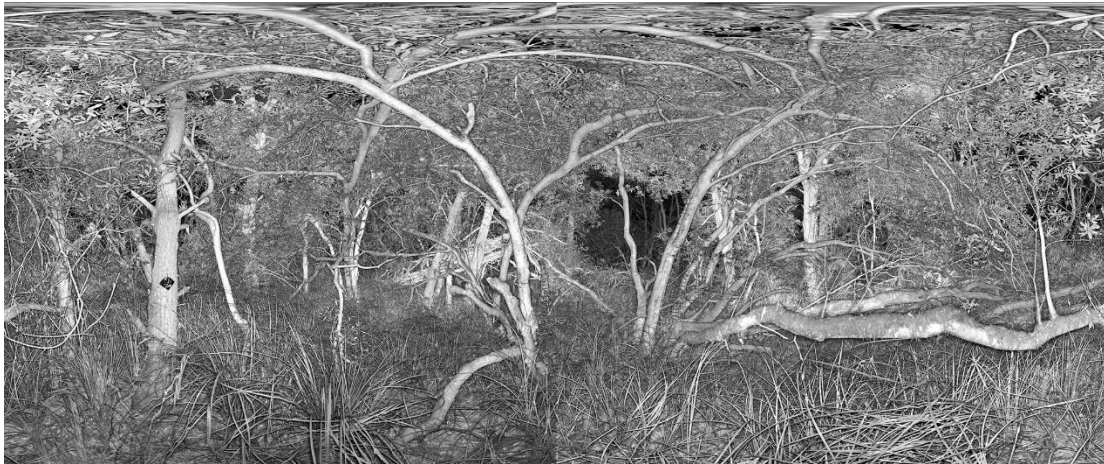

| Scan #/ Plot # / Date / Time  | UTM (NAD 83)        | Aspect / Degree / TT | LiDDI / BA (m <sup>2</sup> /ha) / DBH V (cm) |
|-------------------------------|---------------------|----------------------|----------------------------------------------|
| 007 / NS9 / 09-19-2014 / 1350 | 10T 0394349 4805131 | - / - / 2m 235°      | 1.9 / 25 / 18                                |

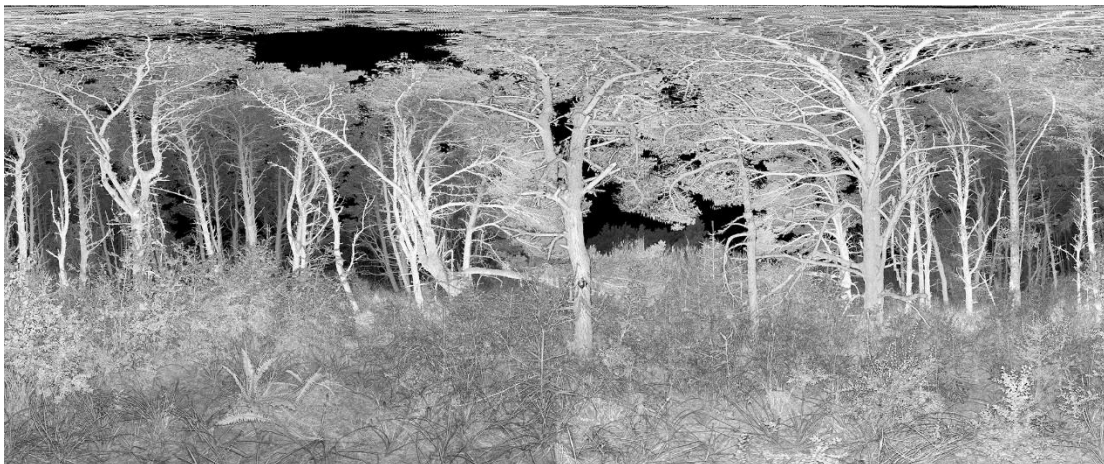

| Scan #/ Plot # / Date / Time  | UTM (NAD 83)        | Aspect / Degree / TT | LiDDI / BA (m <sup>2</sup> /ha) / DBH V (cm) |
|-------------------------------|---------------------|----------------------|----------------------------------------------|
| 008 / NS6 / 09-19-2014 / 1430 | 10T 0394320 4805224 | - / - / 3m 250°      | 3.0 / 52 / 36                                |

| Name                   | EcoRegion   | Ecological Systems Description                                      |
|------------------------|-------------|---------------------------------------------------------------------|
| Port Orford Cedar (PO) | Coast Range | North Pacific Maritime Mesic-Wet Douglas-fir-Western Hemlock Forest |

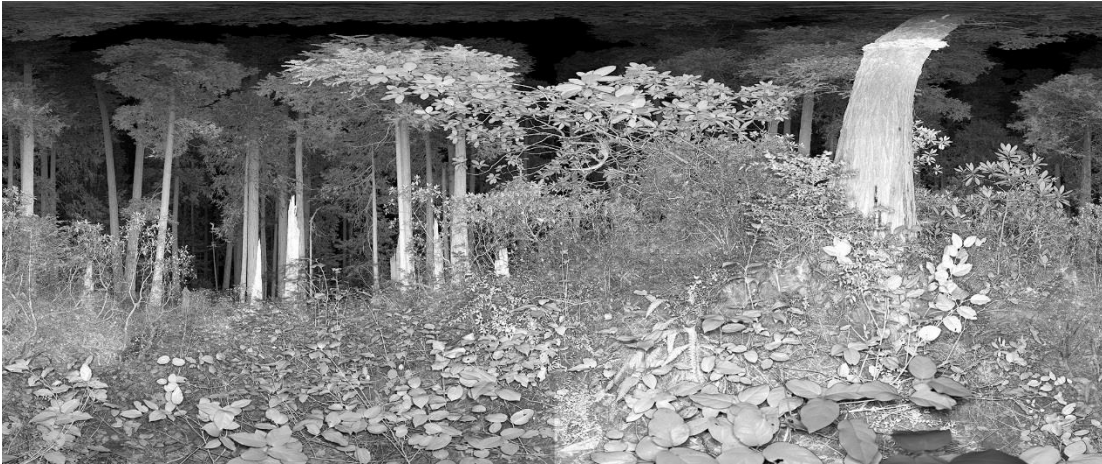

| Scan #/ Plot # / Date / Time  | UTM (NAD 83)        | Aspect / Degree / TT | LiDDI / BA (m <sup>2</sup> /ha) / DBH V (cm) |
|-------------------------------|---------------------|----------------------|----------------------------------------------|
| 000 / PO8 / 09-28-2014 / 1115 | 10T 0411896 4732641 | 135° / 20° / 2m 335° | 4.2 / 94 / 329                               |

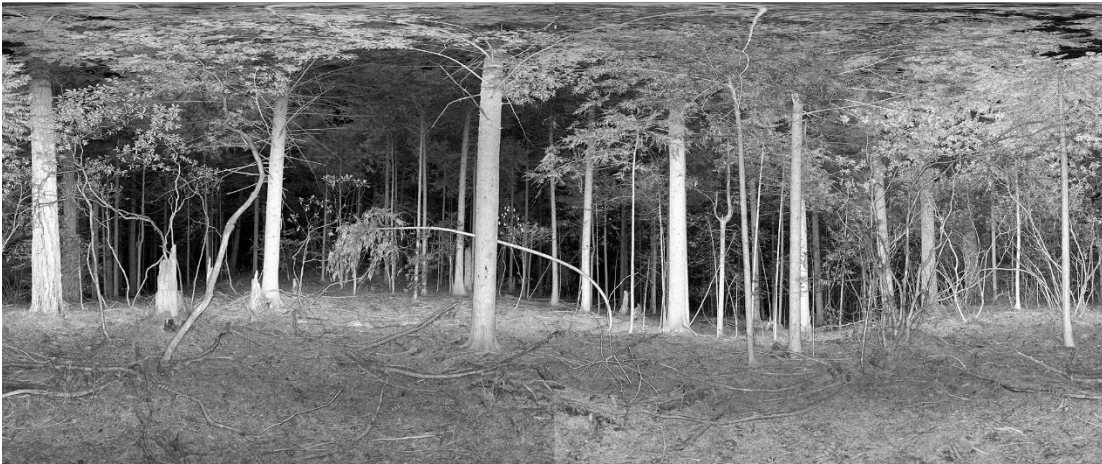

| Scan #/ Plot # / Date / Time  | UTM (NAD 83)        | Aspect / Degree / TT | LiDDI / BA (m <sup>2</sup> /ha) / DBH V (cm) |
|-------------------------------|---------------------|----------------------|----------------------------------------------|
| 001 / PO5 / 09-28-2014 / 1210 | 10T 0411876 4732747 | - / - / 3m 350°      | 5.0 / 104 / 132                              |

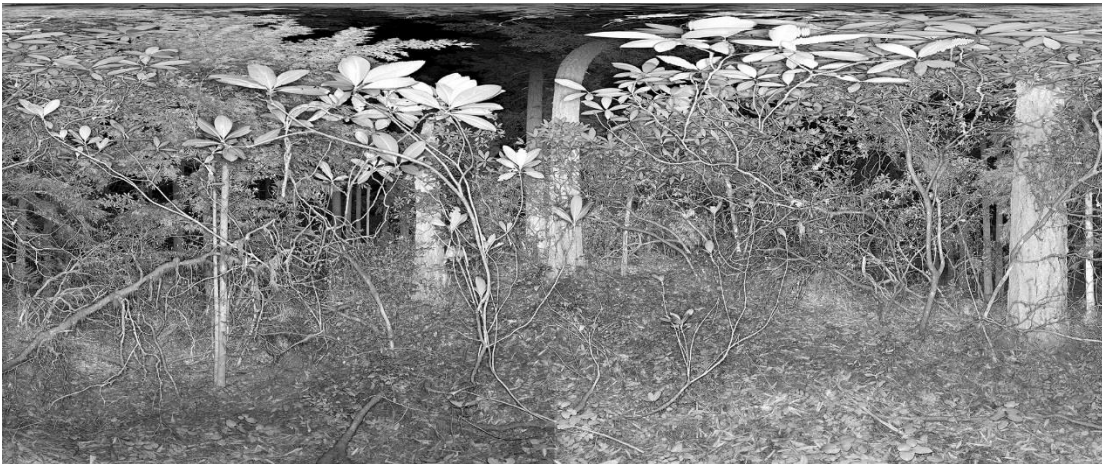

| Scan #/ Plot # / Date / Time  | UTM (NAD 83)        | Aspect / Degree / TT | LiDDI / BA (m <sup>2</sup> /ha) / DBH V (cm) |
|-------------------------------|---------------------|----------------------|----------------------------------------------|
| 002 / PO9 / 09-28-2014 / 1250 | 10T 0411994 4732673 | 10° / 10° / 3m 270°  | 4.2 / 87 / 235                               |

| Name                   | EcoRegion   | Ecological Systems Description                                      |
|------------------------|-------------|---------------------------------------------------------------------|
| Port Orford Cedar (PO) | Coast Range | North Pacific Maritime Mesic-Wet Douglas-fir-Western Hemlock Forest |

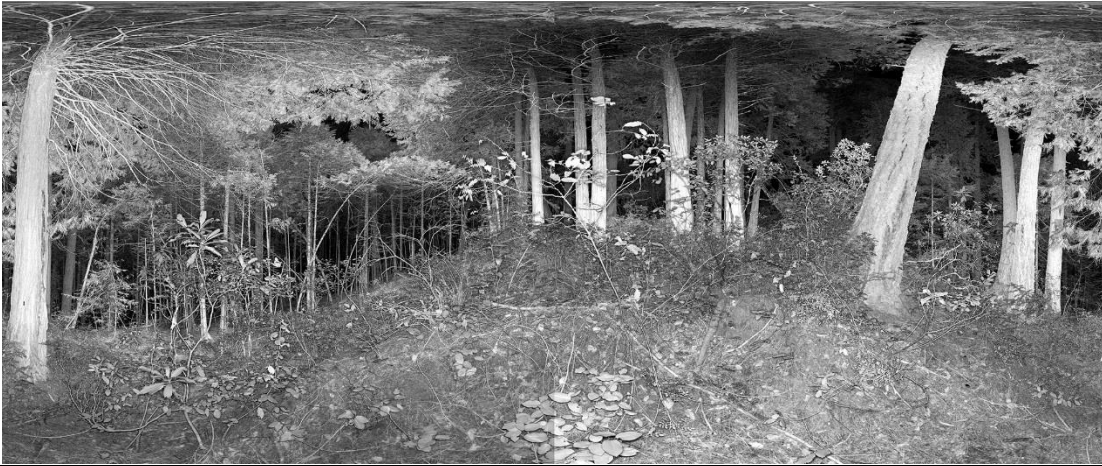

| Scan #/ Plot # / Date / Time  | UTM (NAD 83)        | Aspect / Degree / TT | LiDDI / BA (m <sup>2</sup> /ha) / DBH V (cm) |
|-------------------------------|---------------------|----------------------|----------------------------------------------|
| 003 / PO6 / 09-28-2014 / 1325 | 10T 0411978 4732769 | 105° / 25° / 3m 70°  | 3.0 / 110 / 196                              |

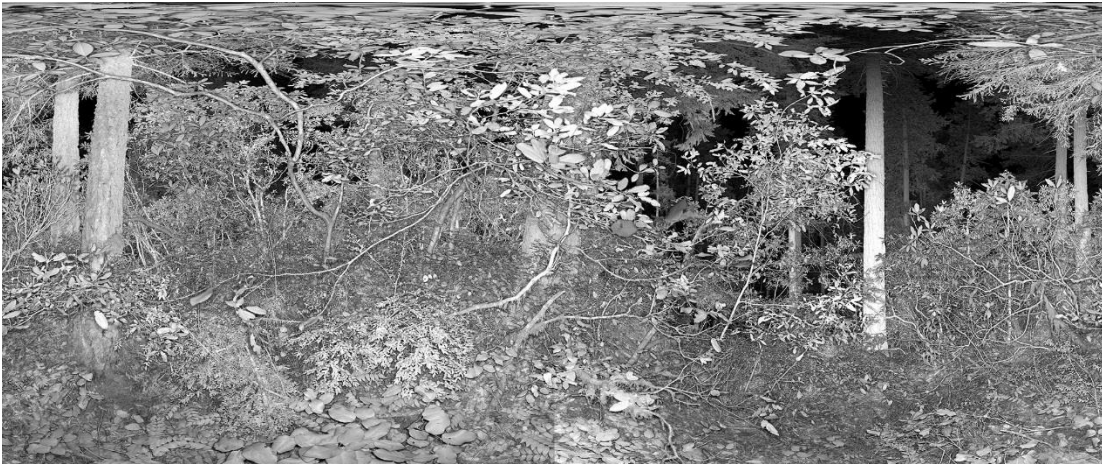

| Scan #/ Plot # / Date / Time  | UTM (NAD 83)        | Aspect / Degree / TT | LiDDI / BA (m <sup>2</sup> /ha) / DBH V (cm) |
|-------------------------------|---------------------|----------------------|----------------------------------------------|
| 004 / PO3 / 09-28-2014 / 1400 | 10T 0411943 4732862 | 100° / 22° / 3m 205° | 4.3 / 69 / 189                               |

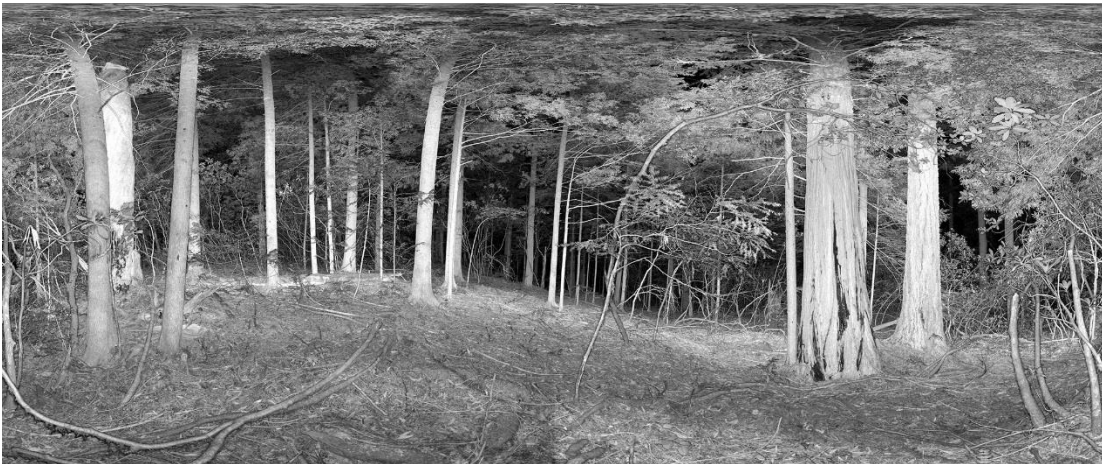

| Scan #/ Plot # / Date / Time  | UTM (NAD 83)        | Aspect / Degree / TT | LiDDI / BA (m <sup>2</sup> /ha) / DBH V (cm) |
|-------------------------------|---------------------|----------------------|----------------------------------------------|
| 005 / PO2 / 09-28-2014 / 1435 | 10T 0411849 4732842 | 95° / 10° / 3m 185°  | 4.1 / 63 / 112                               |

| Name                   | EcoRegion   | Ecological Systems Description                                      |
|------------------------|-------------|---------------------------------------------------------------------|
| Port Orford Cedar (PO) | Coast Range | North Pacific Maritime Mesic-Wet Douglas-fir-Western Hemlock Forest |

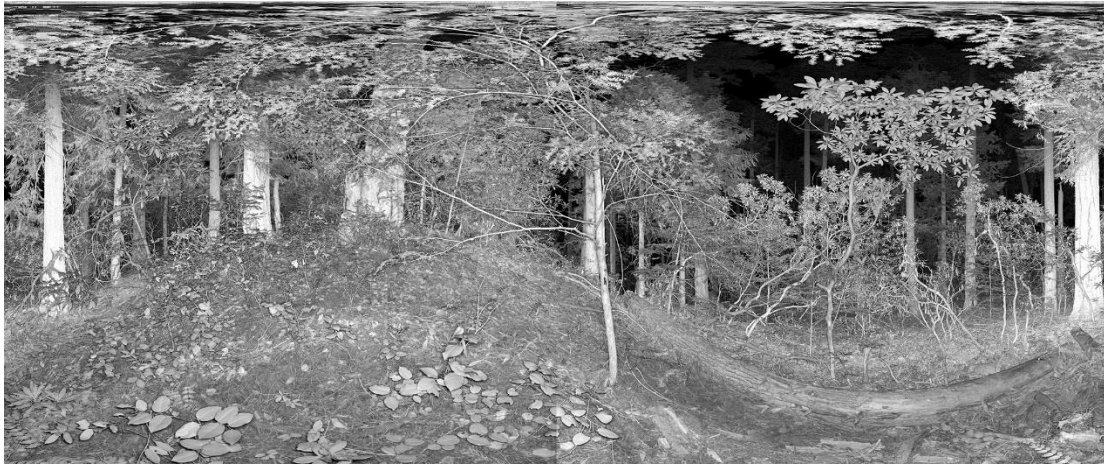

| Scan #/ Plot # / Date / Time  | UTM (NAD 83)        | Aspect / Degree / TT | LiDDI / BA (m <sup>2</sup> /ha) / DBH V (cm) |
|-------------------------------|---------------------|----------------------|----------------------------------------------|
| 006 / PO1 / 09-28-2014 / 1520 | 10T 0411748 4732822 | 140° / 22° / 2m 365° | 5.3 / 109 / 313                              |

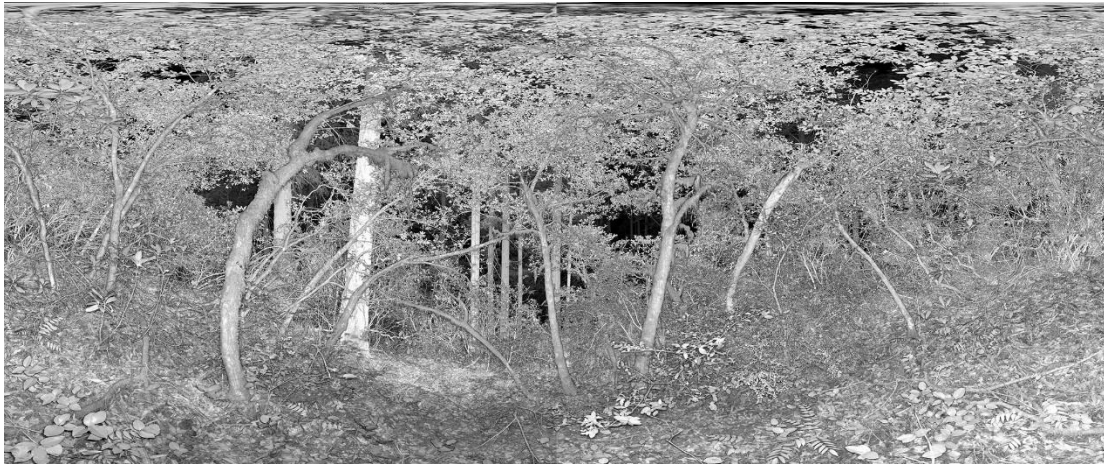

| Scan #/ Plot # / Date / Time  | UTM (NAD 83)        | Aspect / Degree / TT | LiDDI / BA (m <sup>2</sup> /ha) / DBH V (cm) |
|-------------------------------|---------------------|----------------------|----------------------------------------------|
| 007 / PO4 / 09-28-2014 / 1555 | 10T 0411785 4732720 | 175° / 22° / 1m 50°  | 2.7 / 17 / 50                                |

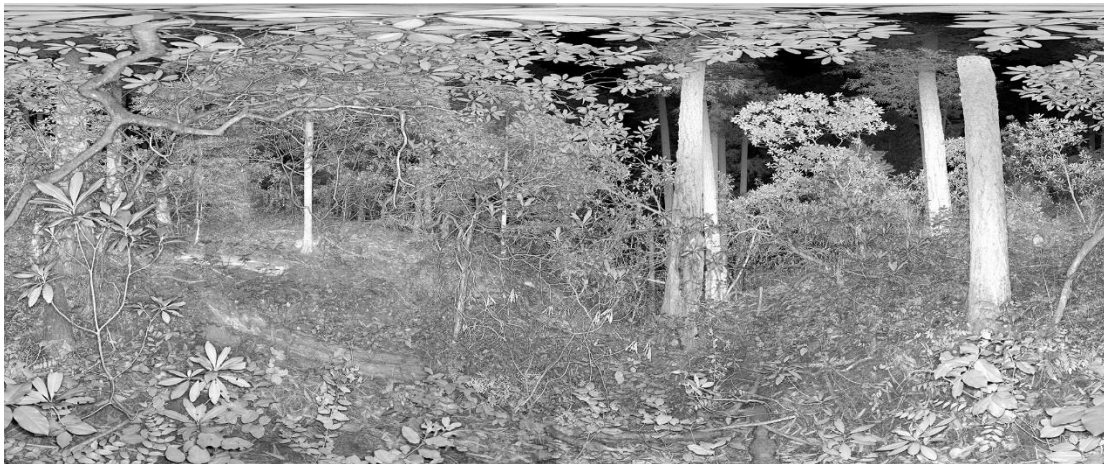

| Scan #/ Plot # / Date / Time  | UTM (NAD 83)        | Aspect / Degree / TT | LiDDI / BA (m <sup>2</sup> /ha) / DBH V (cm) |
|-------------------------------|---------------------|----------------------|----------------------------------------------|
| 008 / PO7 / 09-28-2014 / 1640 | 10T 0411808 4732617 | 110° / 15° / 4m 110° | 3.0 / 23 / 101                               |

| Name             | EcoRegion     | Ecological Systems Description                                |
|------------------|---------------|---------------------------------------------------------------|
| Smith Butte (SB) | East Cascades | East Cascades Mesic Montane Mixed-Conifer Forest and Woodland |

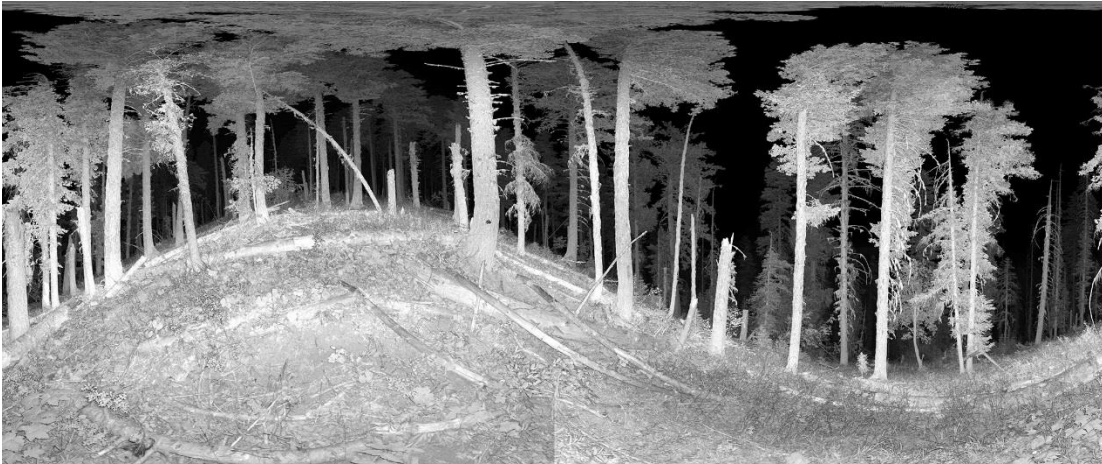

| Scan #/ Plot # / Date / Time  | UTM (NAD 83)        | Aspect / Degree / TT | LiDDI / BA (m <sup>2</sup> /ha) / DBH V (cm) |
|-------------------------------|---------------------|----------------------|----------------------------------------------|
| 000 / SB9 / 08-28-2014 / 1420 | 10T 0619030 5103872 | 50° / 37° / 5m 290°  | 3.0 / 65 / 78                                |

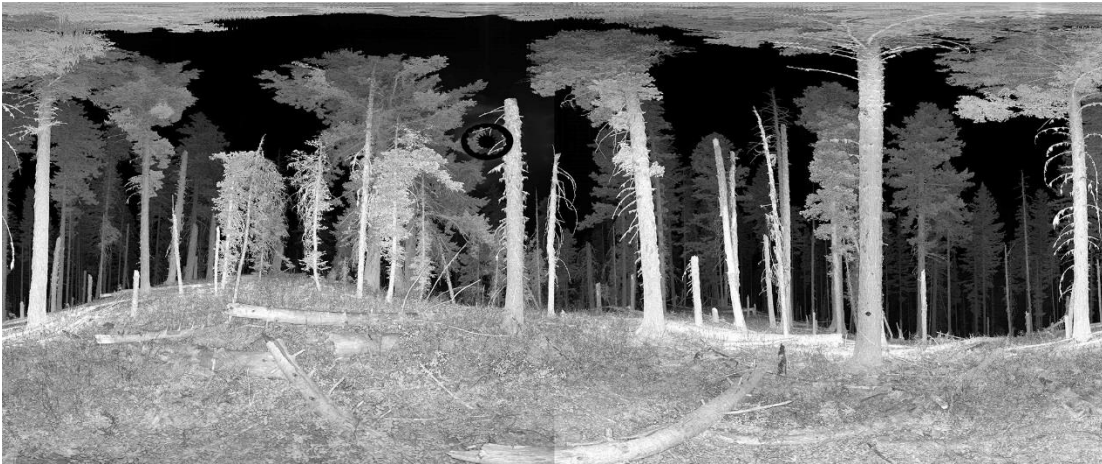

| Scan #/ Plot # / Date / Time  | UTM (NAD 83)        | Aspect / Degree / TT | LiDDI / BA (m <sup>2</sup> /ha) / DBH V (cm) |
|-------------------------------|---------------------|----------------------|----------------------------------------------|
| 001 / SB8 / 08-28-2014 / 1500 | 10T 0618934 5103841 | 330° / 8° / 5m 345°  | 3.9 / 78 / 161                               |

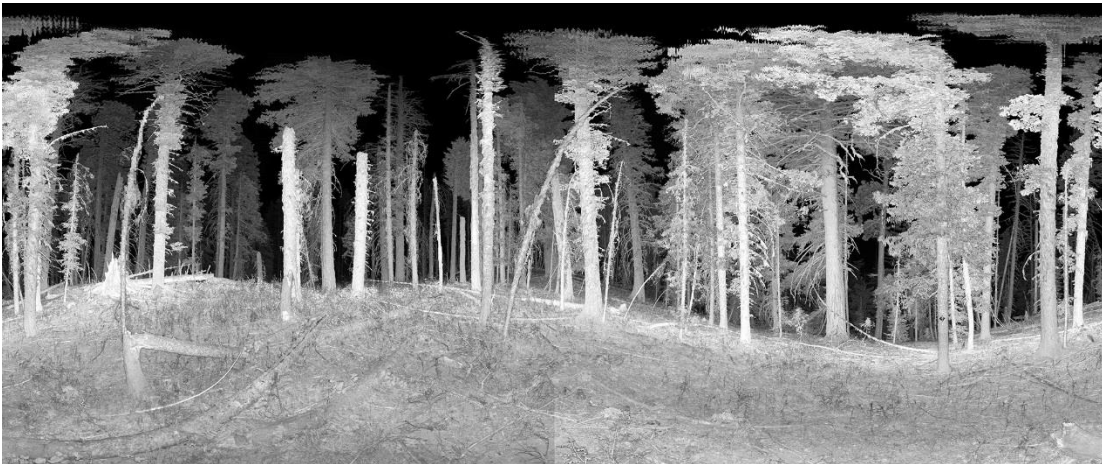

| Scan #/ Plot # / Date / Time  | UTM (NAD 83)        | Aspect / Degree / TT | LiDDI / BA (m <sup>2</sup> /ha) / DBH V (cm) |
|-------------------------------|---------------------|----------------------|----------------------------------------------|
| 002 / SB7 / 08-28-2014 / 1530 | 10T 0618838 5103824 | 310° / - / 4m 300°   | 6.0 / 122 / 193                              |

| Name             | EcoRegion     | Ecological Systems Description                                |
|------------------|---------------|---------------------------------------------------------------|
| Smith Butte (SB) | East Cascades | East Cascades Mesic Montane Mixed-Conifer Forest and Woodland |

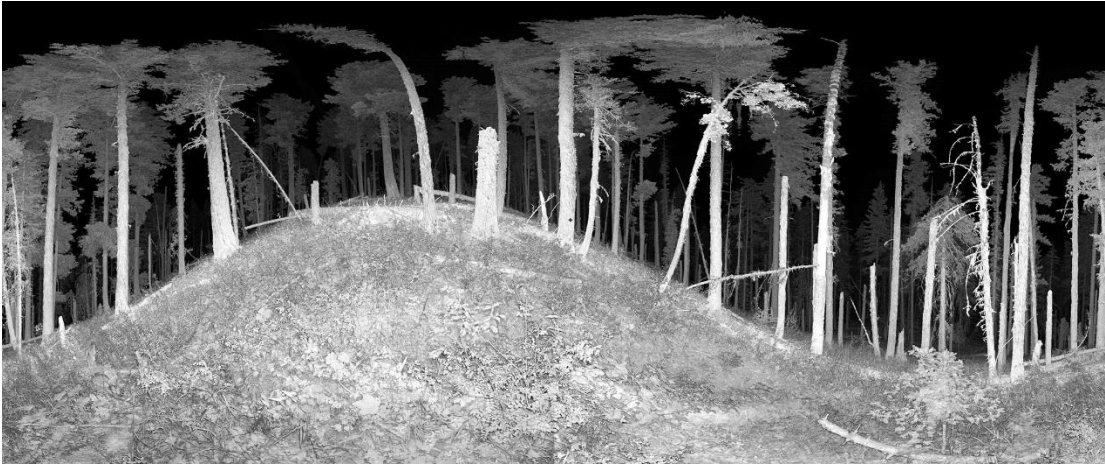

| Scan #/ Plot # / Date / Time  | UTM (NAD 83)        | Aspect / Degree / TT | LiDDI / BA (m <sup>2</sup> /ha) / DBH V (cm) |
|-------------------------------|---------------------|----------------------|----------------------------------------------|
| 003 / SB5 / 08-28-2014 / 1630 | 10T 0618903 5103938 | 14° / 28° / 7m 245°  | 3.0 / 86 / 97                                |

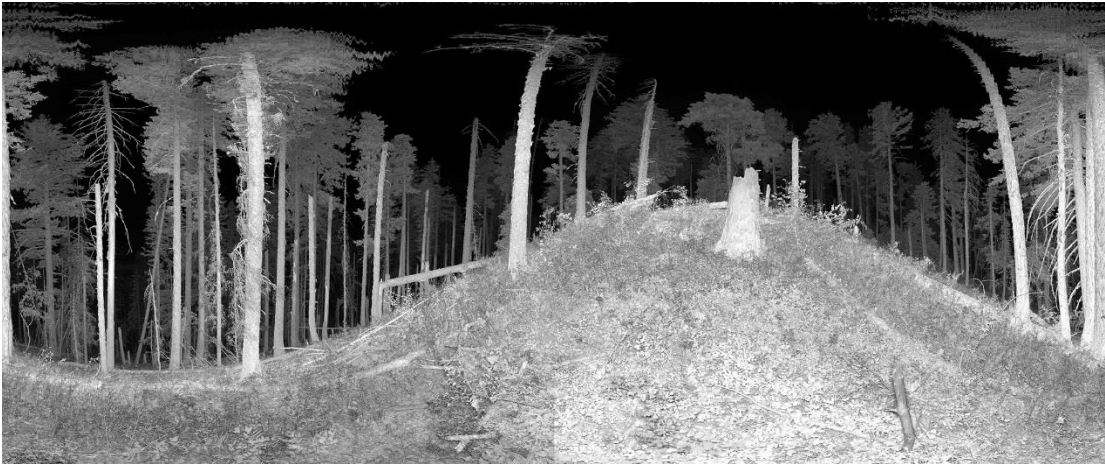

| Scan #/ Plot # / Date / Time  | UTM (NAD 83)        | Aspect / Degree / TT | LiDDI / BA (m <sup>2</sup> /ha) / DBH V (cm) |
|-------------------------------|---------------------|----------------------|----------------------------------------------|
| 004 / SB4 / 08-28-2014 / 1700 | 10T 0618798 5103916 | 320° / 28° / 7m 240° | 3.9 / 61 / 50                                |

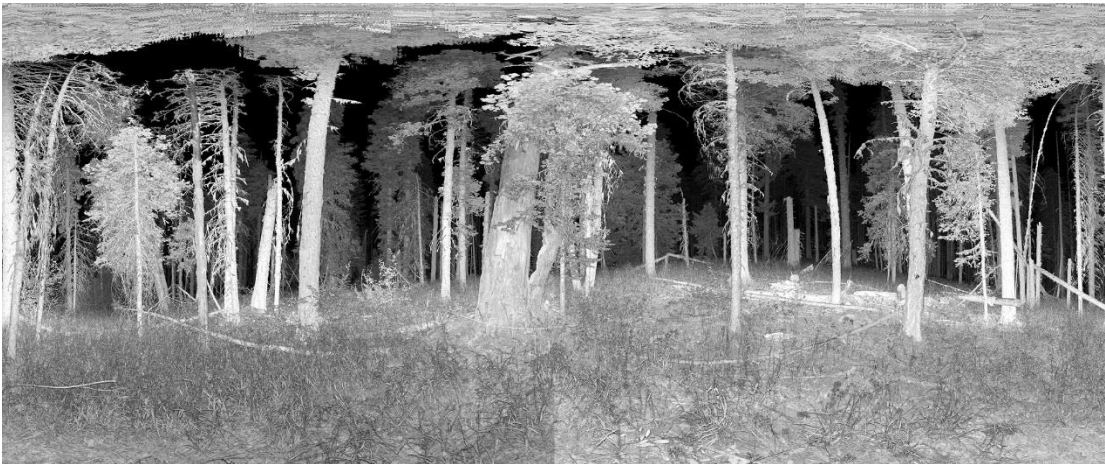

| Scan #/ Plot # / Date / Time  | UTM (NAD 83)        | Aspect / Degree / TT | LiDDI / BA (m <sup>2</sup> /ha) / DBH V (cm) |
|-------------------------------|---------------------|----------------------|----------------------------------------------|
| 005 / SB1 / 08-28-2014 / 1740 | 10T 0618779 5104014 | 320° / 5° / 3m 180°  | 4.0 / 77 / 105                               |

| Name             | EcoRegion     | Ecological Systems Description                                |
|------------------|---------------|---------------------------------------------------------------|
| Smith Butte (SB) | East Cascades | East Cascades Mesic Montane Mixed-Conifer Forest and Woodland |

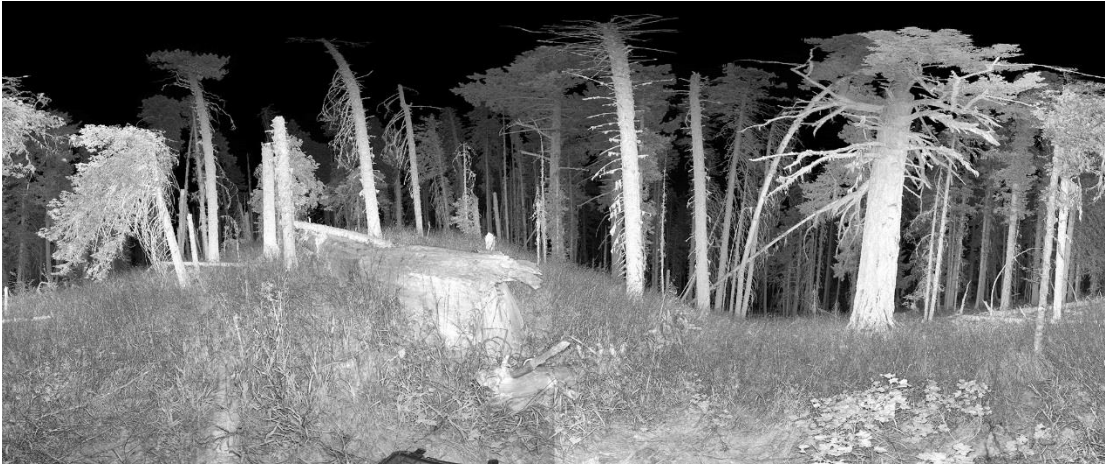

| Scan #/ Plot # / Date / Time  | UTM (NAD 83)        | Aspect / Degree / TT | LiDDI / BA (m <sup>2</sup> /ha) / DBH V (cm) |
|-------------------------------|---------------------|----------------------|----------------------------------------------|
| 006 / SB2 / 08-28-2014 / 1810 | 10T 0618879 5104042 | 280° / 15° / 3m 28°  | 5.6 / 94 / 349                               |

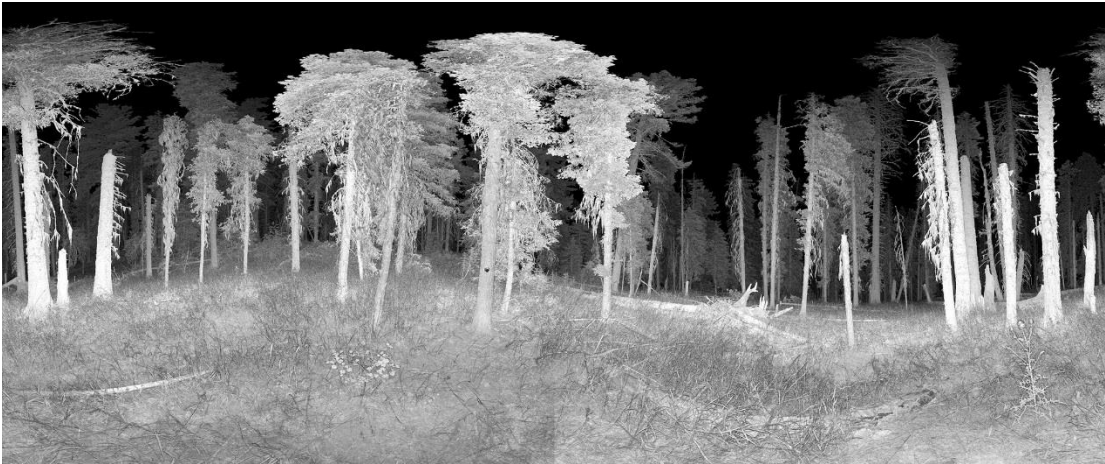

| Scan #/ Plot # / Date / Time  | UTM (NAD 83)        | Aspect / Degree / TT | LiDDI / BA (m <sup>2</sup> /ha) / DBH V (cm) |
|-------------------------------|---------------------|----------------------|----------------------------------------------|
| 007 / SB3 / 08-28-2014 / 1845 | 10T 0618978 5104058 | 130° / 5° / 3m 360°  | 3.0 / 83 / 128                               |

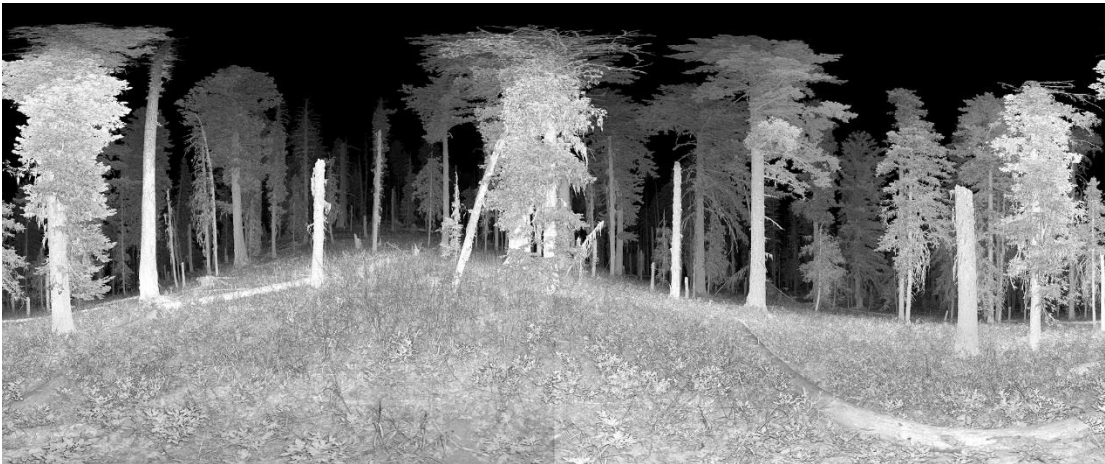

| Scan #/ Plot # / Date / Time  | UTM (NAD 83)        | Aspect / Degree / TT | LiDDI / BA (m <sup>2</sup> /ha) / DBH V (cm) |
|-------------------------------|---------------------|----------------------|----------------------------------------------|
| 008 / SB6 / 08-28-2014 / 1910 | 10T 0619001 5103965 | 60° / - / 4m 102°    | 3.9 / 66 / 224                               |

| Name                     | EcoRegion     | Ecological Systems Description                                        |
|--------------------------|---------------|-----------------------------------------------------------------------|
| Steam Boat Mountain (SM) | West Cascades | North Pacific Dry-Mesic Silver Fir-Western Hemlock-Douglas-fir Forest |

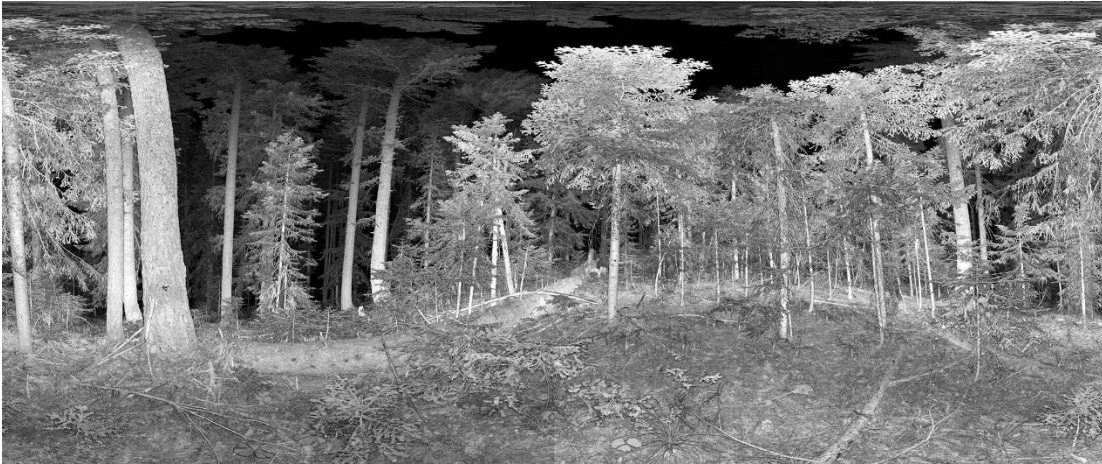

| Scan #/ Plot # / Date / Time  | UTM (NAD 83)        | Aspect / Degree / TT | LiDDI / BA (m <sup>2</sup> /ha) / DBH V (cm) |
|-------------------------------|---------------------|----------------------|----------------------------------------------|
| 000 / SM7 / 08-29-2014 / 1030 | 10T 0597456 5109167 | 220° / 13° / 3m 230° | 3.0 / 64 / 216                               |

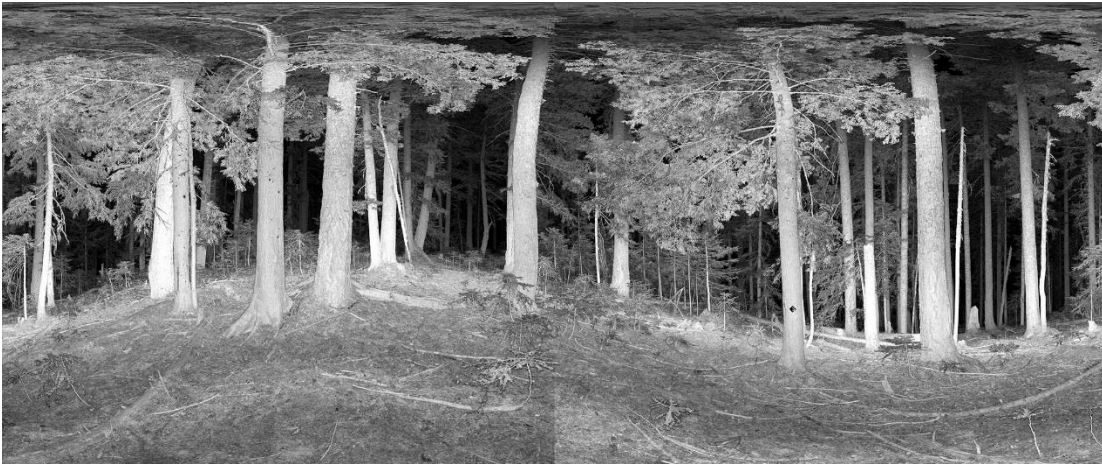

| Scan #/ Plot # / Date / Time  | UTM (NAD 83)        | Aspect / Degree / TT | LiDDI / BA (m <sup>2</sup> /ha) / DBH V (cm) |
|-------------------------------|---------------------|----------------------|----------------------------------------------|
| 001 / SM4 / 08-29-2014 / 1105 | 10T 0597434 5109274 | 260° / 16° / 3m 236° | 3.0 / 117 / 187                              |

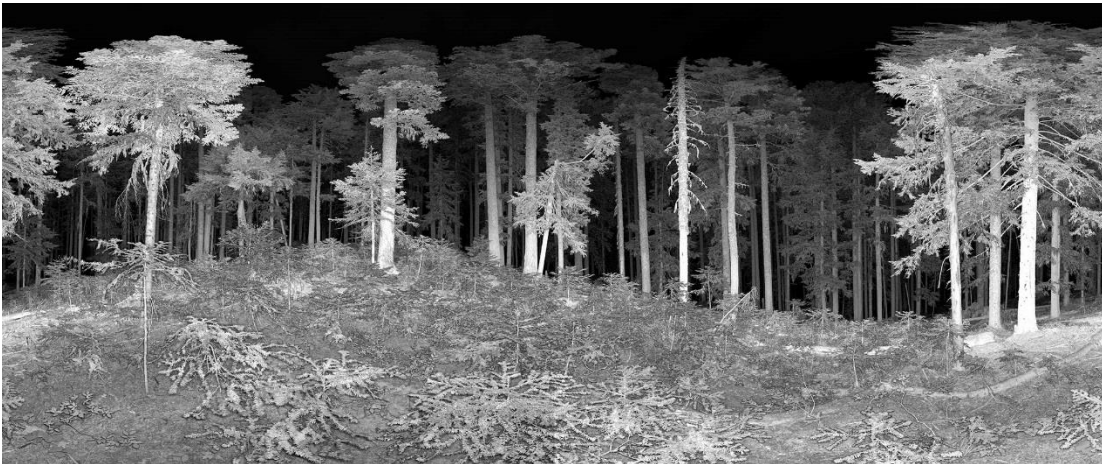

| Scan #/ Plot # / Date / Time  | UTM (NAD 83)        | Aspect / Degree / TT | LiDDI / BA (m <sup>2</sup> /ha) / DBH V (cm) |
|-------------------------------|---------------------|----------------------|----------------------------------------------|
| 002 / SM1 / 08-29-2014 / 1140 | 10T 0597411 5109365 | 300° / 14° / 4m 60°  | 3.0 / 62 / 109                               |

| Name                     | EcoRegion     | Ecological Systems Description                                        |
|--------------------------|---------------|-----------------------------------------------------------------------|
| Steam Boat Mountain (SM) | West Cascades | North Pacific Dry-Mesic Silver Fir-Western Hemlock-Douglas-fir Forest |

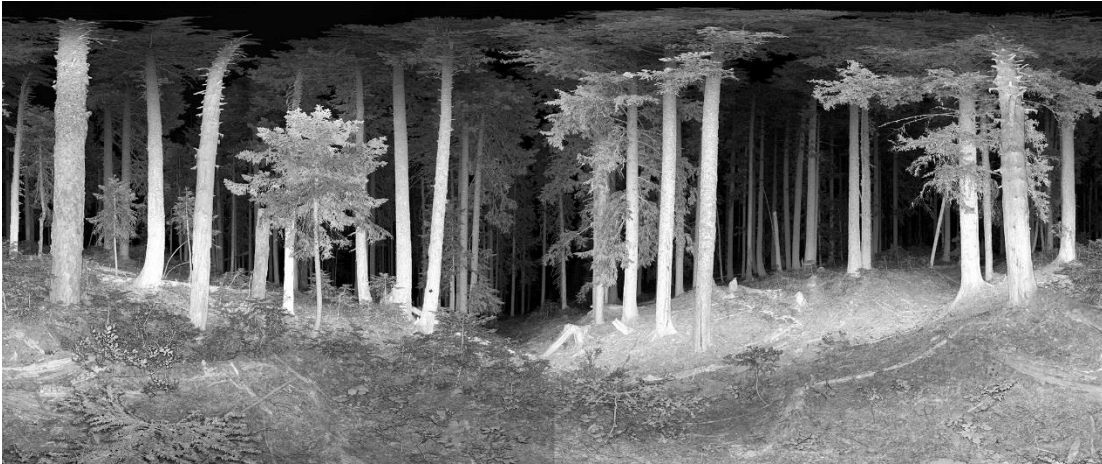

| Scan #/ Plot # / Date / Time  | UTM (NAD 83)        | Aspect / Degree / TT | LiDDI / BA (m <sup>2</sup> /ha) / DBH V (cm) |
|-------------------------------|---------------------|----------------------|----------------------------------------------|
| 003 / SM2 / 08-29-2014 / 1230 | 10T 0597503 5109395 | 280° / 13° / 6m 265° | 3.0 / 93 / 114                               |

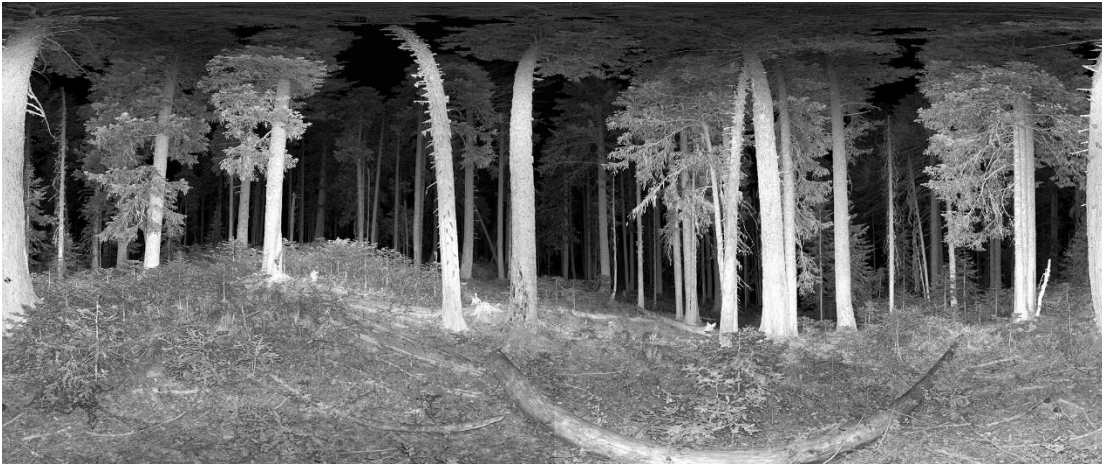

| Scan #/ Plot # / Date / Time  | UTM (NAD 83)        | Aspect / Degree / TT | LiDDI / BA (m <sup>2</sup> /ha) / DBH V (cm) |
|-------------------------------|---------------------|----------------------|----------------------------------------------|
| 004 / SM3 / 08-29-2014 / 1300 | 10T 0597604 5109416 | 250° / 12° / 3m 306° | 4.0 / 103 / 269                              |

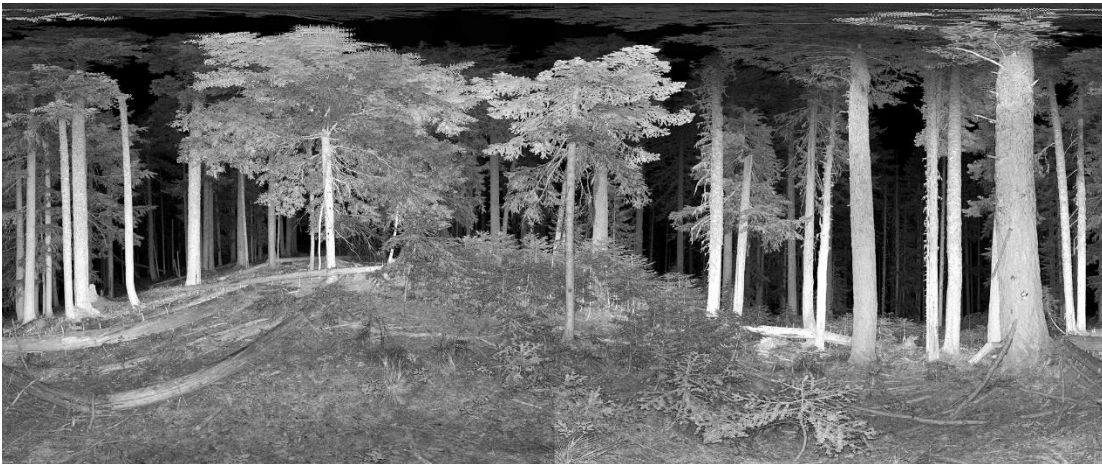

| Scan #/ Plot # / Date / Time  | UTM (NAD 83)        | Aspect / Degree / TT | LiDDI / BA (m <sup>2</sup> /ha) / DBH V (cm) |
|-------------------------------|---------------------|----------------------|----------------------------------------------|
| 005 / SM6 / 08-29-2014 / 1330 | 10T 0597631 5109314 | 300° / 15° / 3m 304° | 3.0 / 99 / 97                                |

| Name                     | EcoRegion     | Ecological Systems Description                                        |
|--------------------------|---------------|-----------------------------------------------------------------------|
| Steam Boat Mountain (SM) | West Cascades | North Pacific Dry-Mesic Silver Fir-Western Hemlock-Douglas-fir Forest |

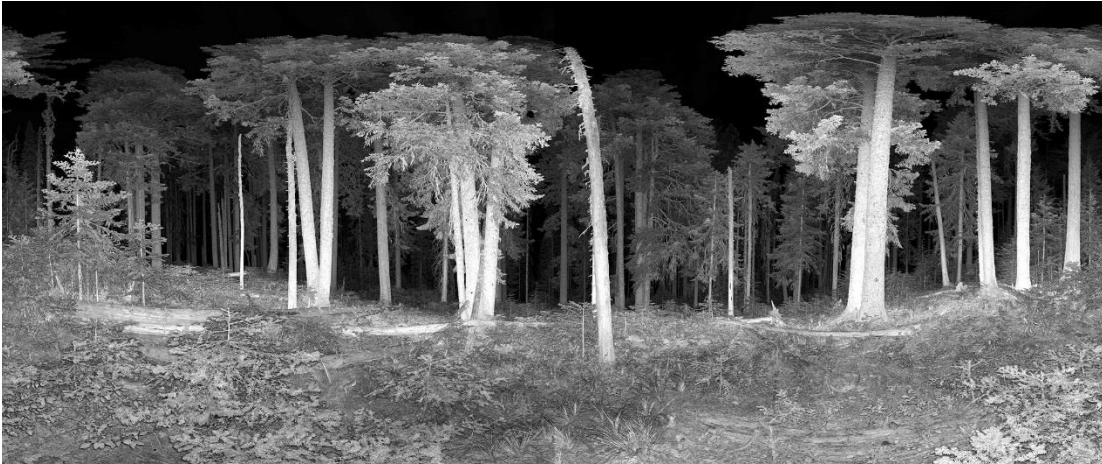

| Scan #/ Plot # / Date / Time  | UTM (NAD 83)        | Aspect / Degree / TT | LiDDI / BA (m <sup>2</sup> /ha) / DBH V (cm) |
|-------------------------------|---------------------|----------------------|----------------------------------------------|
| 006 / SM9 / 08-29-2014 / 1400 | 10T 0597647 5109226 | 256° / 12° / 5m 316° | 3.0 / 94 / 155                               |

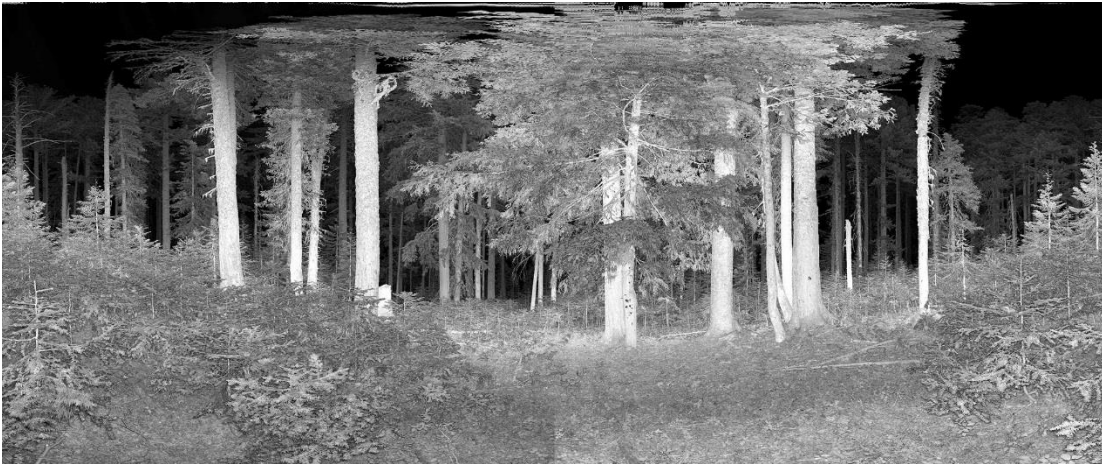

| Scan #/ Plot # / Date / Time  | UTM (NAD 83)        | Aspect / Degree / TT | LiDDI / BA (m <sup>2</sup> /ha) / DBH V (cm) |
|-------------------------------|---------------------|----------------------|----------------------------------------------|
| 007 / SM5 / 08-29-2014 / 1430 | 10T 0597524 5109291 | 280° / 6° / 4m 350°  | 3.0 / 67 / 135                               |

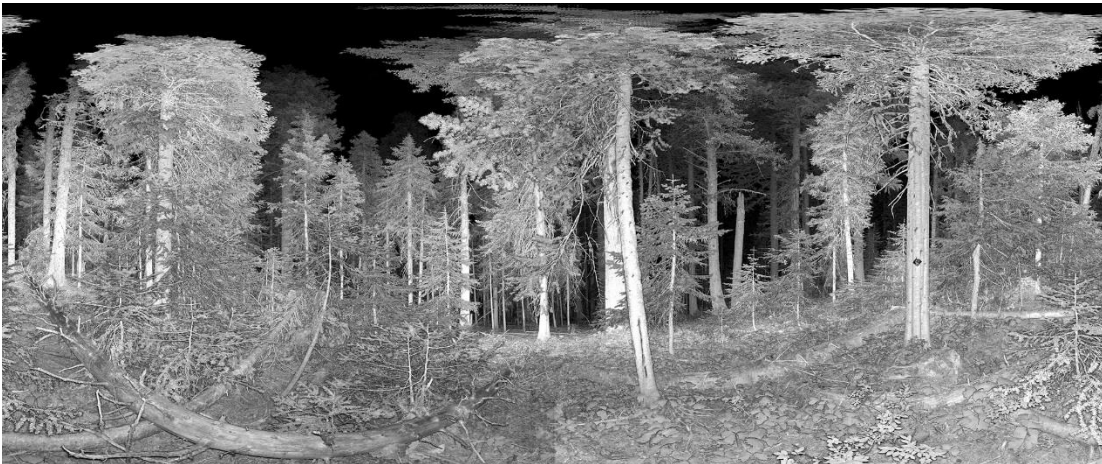

| Scan #/ Plot # / Date / Time  | UTM (NAD 83)        | Aspect / Degree / TT | LiDDI / BA (m <sup>2</sup> /ha) / DBH V (cm) |
|-------------------------------|---------------------|----------------------|----------------------------------------------|
| 008 / SM8 / 08-29-2014 / 1510 | 10T 0597556 5109197 | 220° / 13° / 2m 360° | 3.0 / 70 / 184                               |

| Name                | EcoRegion     | Ecological Systems Description        |
|---------------------|---------------|---------------------------------------|
| Sherwood Butte (SW) | West Cascades | North Pacific Mountain Hemlock Forest |

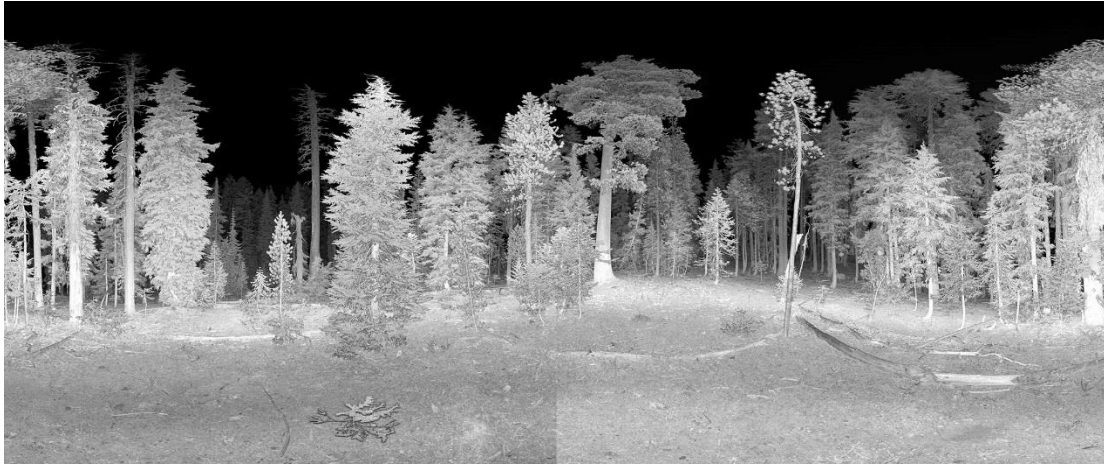

| Scan #/ Plot # / Date / Time  | UTM (NAD 83)        | Aspect / Degree / TT | LiDDI / BA (m <sup>2</sup> /ha) / DBH V (cm) |
|-------------------------------|---------------------|----------------------|----------------------------------------------|
| 000 / SW7 / 09-06-2014 / 1140 | 10T 0560459 4772277 | 250° / 12° / 6m 210° | 3.0 / 49 / 102                               |

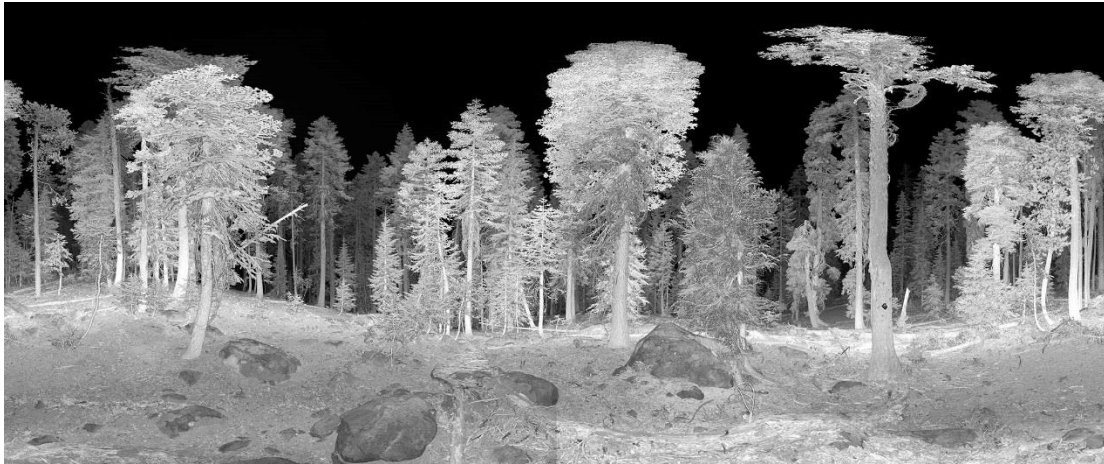

| Scan #/ Plot # / Date / Time  | UTM (NAD 83)        | Aspect / Degree / TT | LiDDI / BA (m <sup>2</sup> /ha) / DBH V (cm) |
|-------------------------------|---------------------|----------------------|----------------------------------------------|
| 001 / SW8 / 09-06-2014 / 1210 | 10T 0560556 4772294 | 10° / 10° / 3m 10°   | 3.0 / 39 / 39                                |

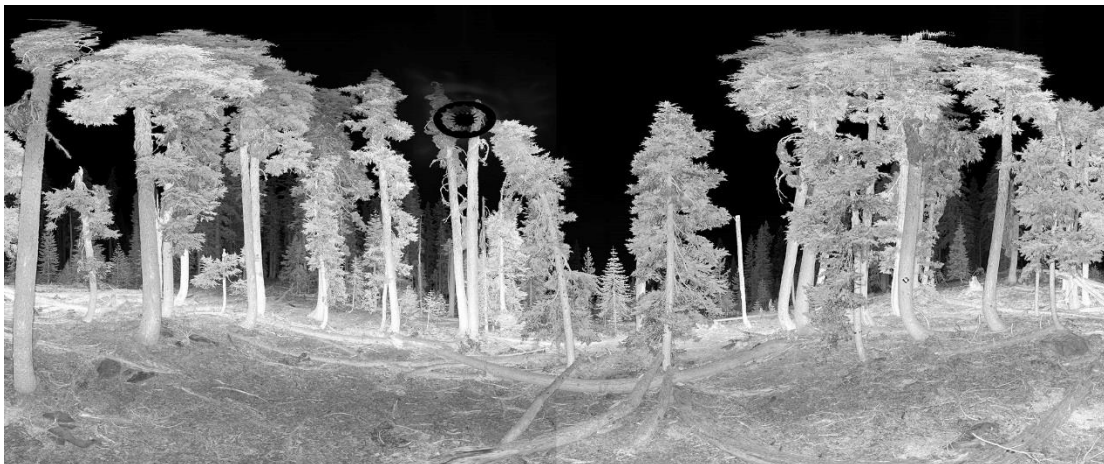

| Scan #/ Plot # / Date / Time  | UTM (NAD 83)        | Aspect / Degree / TT | LiDDI / BA (m <sup>2</sup> /ha) / DBH V (cm) |
|-------------------------------|---------------------|----------------------|----------------------------------------------|
| 002 / SW5 / 09-06-2014 / 1245 | 10T 0560533 4772390 | 245° / 6° / 3m 325°  | 3.0 / 53 / 37                                |

| Name                | EcoRegion     | Ecological Systems Description        |
|---------------------|---------------|---------------------------------------|
| Sherwood Butte (SW) | West Cascades | North Pacific Mountain Hemlock Forest |

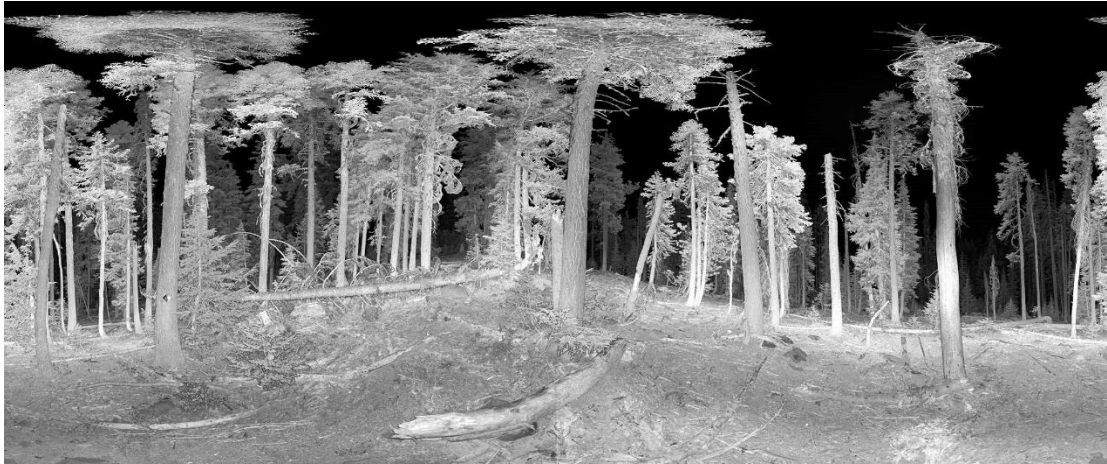

| Scan #/ Plot # / Date / Time  | UTM (NAD 83)        | Aspect / Degree / TT | LiDDI / BA (m <sup>2</sup> /ha) / DBH V (cm) |
|-------------------------------|---------------------|----------------------|----------------------------------------------|
| 003 / SW4 / 09-06-2014 / 1310 | 10T 0560427 4772361 | 250° / 13° / 3m 315° | 3.0 / 48 / 22                                |

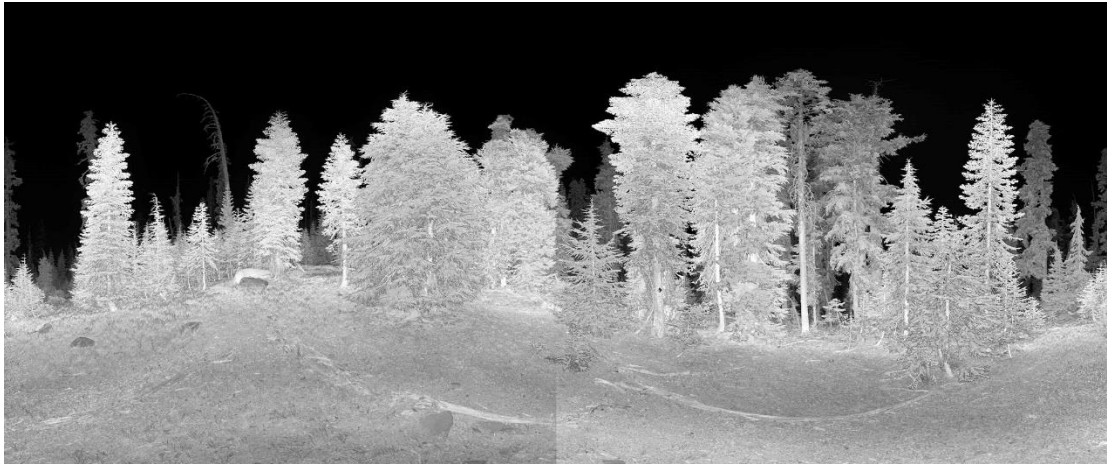

| Scan #/ Plot # / Date / Time  | UTM (NAD 83)        | Aspect / Degree / TT | LiDDI / BA (m <sup>2</sup> /ha) / DBH V (cm) |
|-------------------------------|---------------------|----------------------|----------------------------------------------|
| 004 / SW1 / 09-06-2014 / 1350 | 10T 0560403 4772466 | 225° / 13° / 4m 115° | 1.4 / 10 / 20                                |

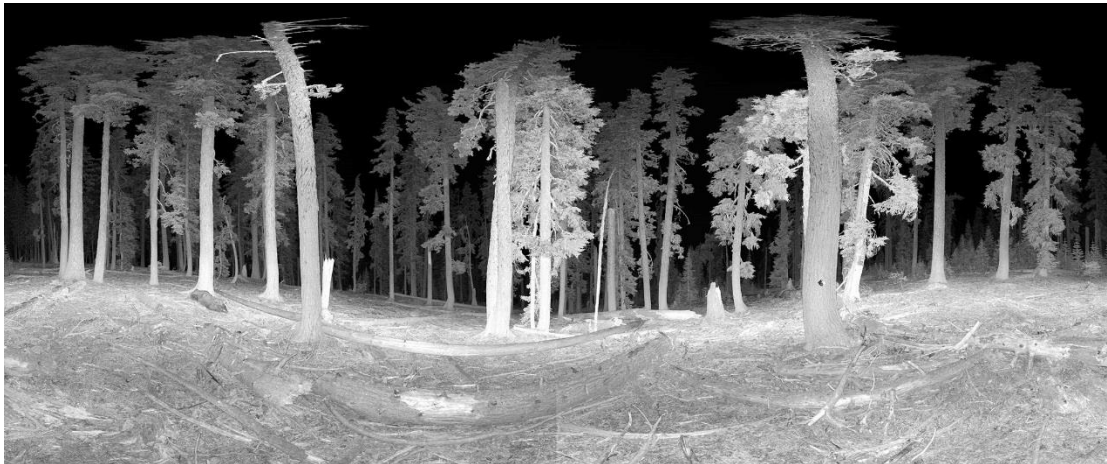

| Scan #/ Plot # / Date / Time  | UTM (NAD 83)        | Aspect / Degree / TT | LiDDI / BA (m <sup>2</sup> /ha) / DBH V (cm) |
|-------------------------------|---------------------|----------------------|----------------------------------------------|
| 005 / SW2 / 09-06-2014 / 1420 | 10T 0560501 4772488 | 205° / 10° / 3m 330° | 3.9 / 82 / 95                                |

| Name                | EcoRegion     | Ecological Systems Description        |
|---------------------|---------------|---------------------------------------|
| Sherwood Butte (SW) | West Cascades | North Pacific Mountain Hemlock Forest |

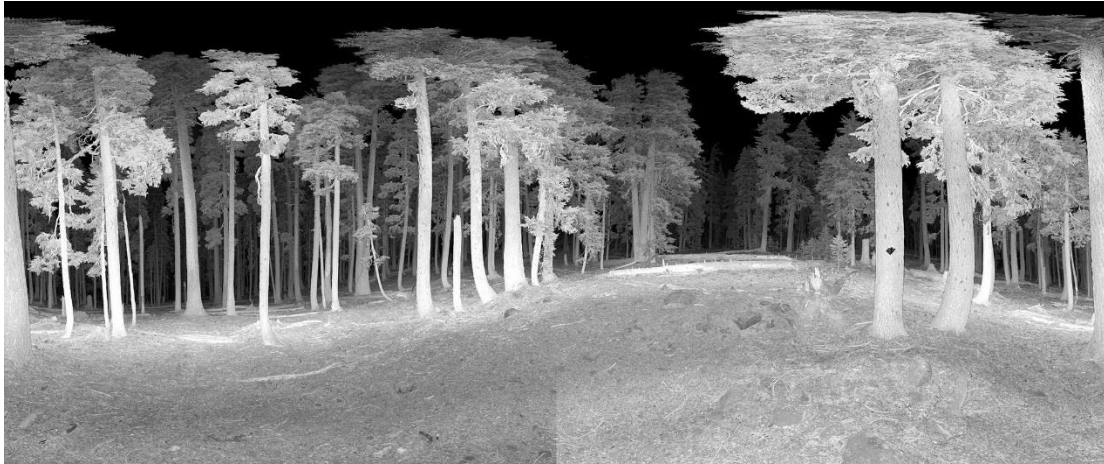

| Scan #/ Plot # / Date / Time  | UTM (NAD 83)        | Aspect / Degree / TT | LiDDI / BA (m <sup>2</sup> /ha) / DBH V (cm) |
|-------------------------------|---------------------|----------------------|----------------------------------------------|
| 006 / SW3 / 09-06-2014 / 1450 | 10T 0560599 4772518 | 210° / 10° / 4m 90°  | 3.0 / 90 / 102                               |

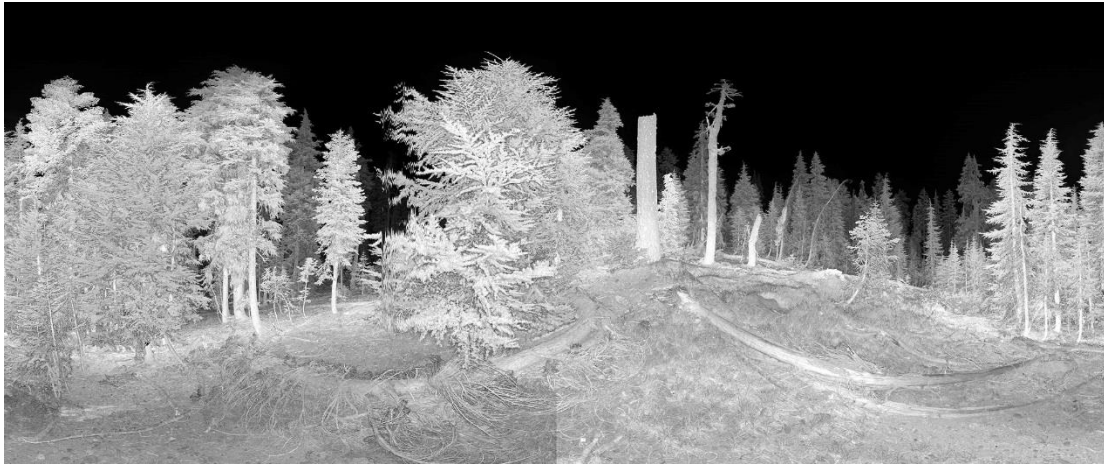

| Scan #/ Plot # / Date / Time  | UTM (NAD 83)        | Aspect / Degree / TT | LiDDI / BA (m <sup>2</sup> /ha) / DBH V (cm) |
|-------------------------------|---------------------|----------------------|----------------------------------------------|
| 007 / SW6 / 09-06-2014 / 1520 | 10T 0560618 4772430 | 265° / 18° / 4m 295° | 3.0 / 29 / 75                                |

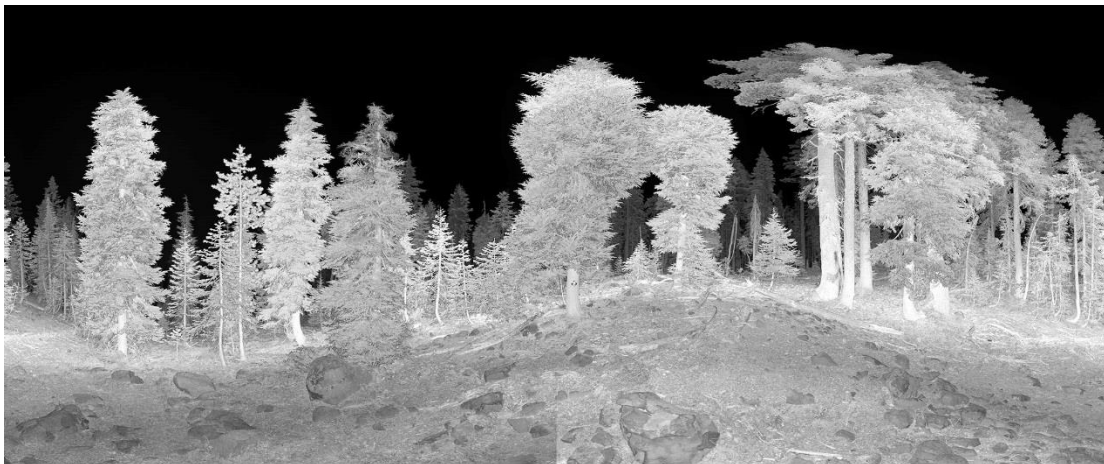

| Scan #/ Plot # / Date / Time  | UTM (NAD 83)        | Aspect / Degree / TT | LiDDI / BA (m <sup>2</sup> /ha) / DBH V (cm) |
|-------------------------------|---------------------|----------------------|----------------------------------------------|
| 008 / SW9 / 09-06-2014 / 1550 | 10T 0560648 4772315 | 280° / 19° / 4m 350° | 3.0 / 34 / 122                               |

| Name             | EcoRegion     | Ecological Systems Description                                      |
|------------------|---------------|---------------------------------------------------------------------|
| Three Creek (TC) | West Cascades | North Pacific Maritime Dry-Mesic Douglas-fir-Western Hemlock Forest |

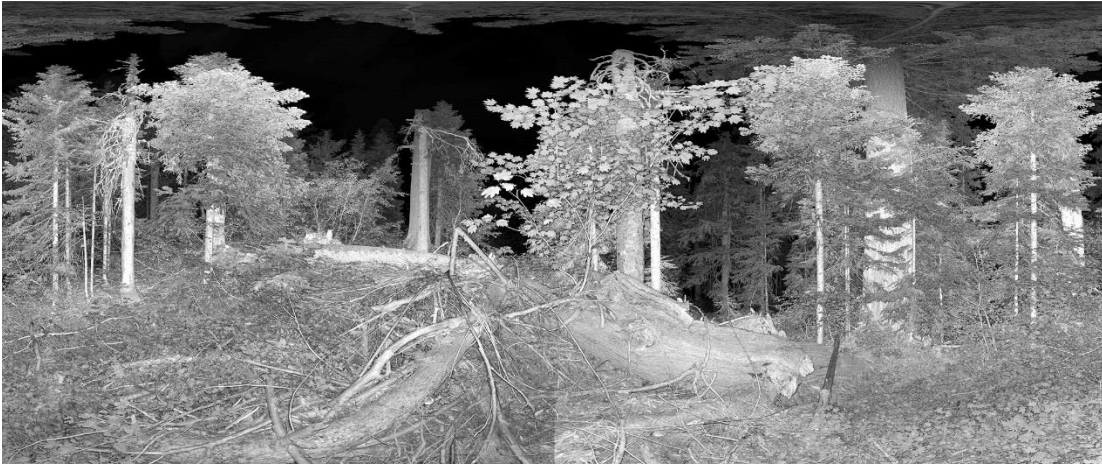

| Scan #/ Plot # / Date / Time  | UTM (NAD 83)        | Aspect / Degree / TT | LiDDI / BA (m <sup>2</sup> /ha) / DBH V (cm) |
|-------------------------------|---------------------|----------------------|----------------------------------------------|
| 005 / TC3 / 08-20-2014 / 1345 | 10T 0559316 4910841 | 78° / 14° / 5m E     | 6.0 / 90 / 455                               |

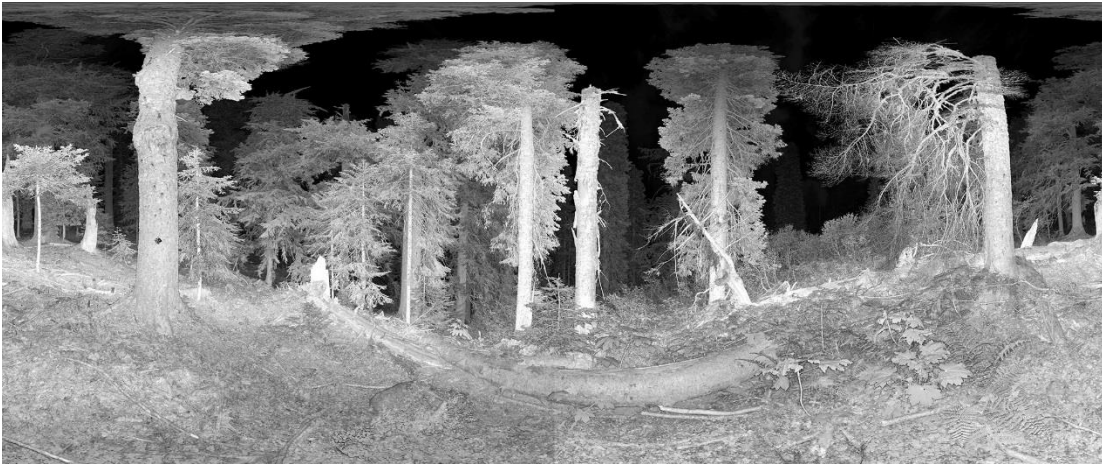

| Scan #/ Plot # / Date / Time  | UTM (NAD 83)        | Aspect / Degree / TT | LiDDI / BA (m <sup>2</sup> /ha) / DBH V (cm) |
|-------------------------------|---------------------|----------------------|----------------------------------------------|
| 006 / TC2 / 08-20-2014 / 1430 | 10T 0559192 4910868 | 274° / 20° / 3m NW   | 5.2 / 105 / 336                              |

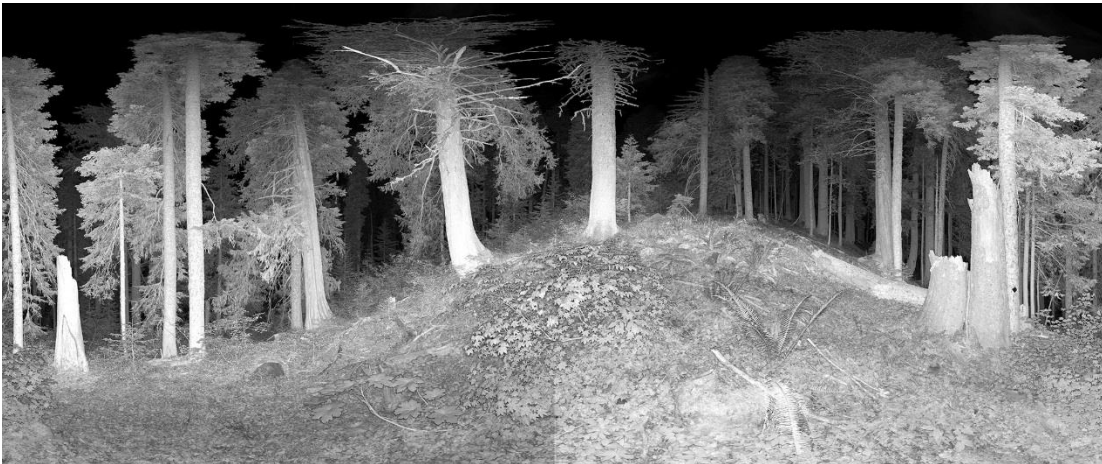

| Scan #/ Plot # / Date / Time  | UTM (NAD 83)        | Aspect / Degree / TT | LiDDI / BA (m <sup>2</sup> /ha) / DBH V (cm) |
|-------------------------------|---------------------|----------------------|----------------------------------------------|
| 007 / TC1 / 08-20-2014 / 1500 | 10T 0559112 4910827 | 86° / 18° / 4m N     | 6.0 / 130 / 433                              |

| Name             | EcoRegion     | Ecological Systems Description                                      |
|------------------|---------------|---------------------------------------------------------------------|
| Three Creek (TC) | West Cascades | North Pacific Maritime Dry-Mesic Douglas-fir-Western Hemlock Forest |

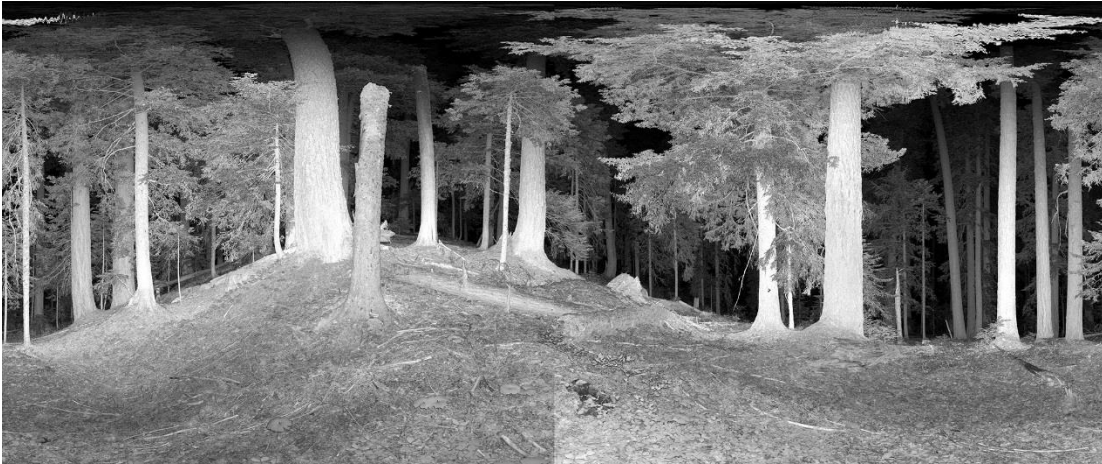

| Scan #/ Plot # / Date / Time  | UTM (NAD 83)        | Aspect / Degree / TT | LiDDI / BA (m <sup>2</sup> /ha) / DBH V (cm) |
|-------------------------------|---------------------|----------------------|----------------------------------------------|
| 008 / TC4 / 08-20-2014 / 1530 | 10T 0559125 4910732 | 60° / 16° / 5m S     | 6.0 / 176 / 690                              |

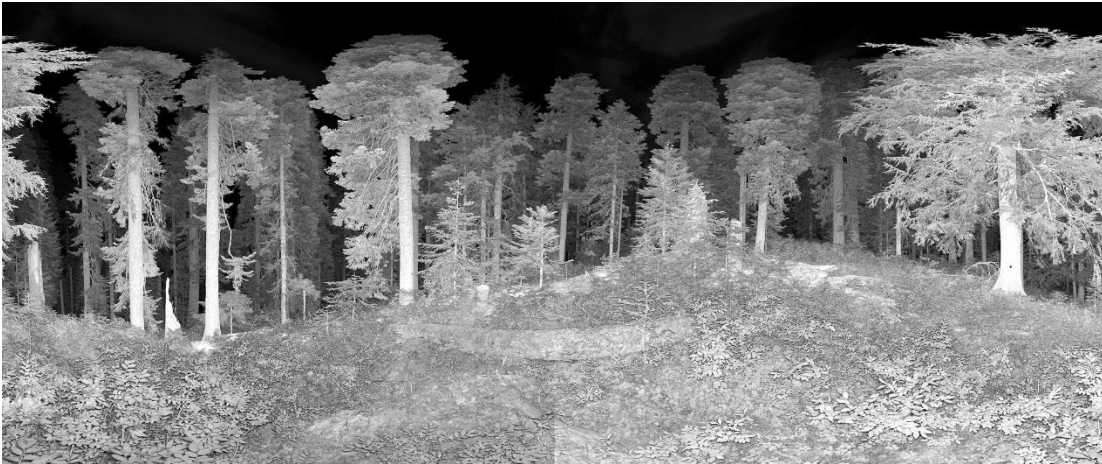

| Scan #/ Plot # / Date / Time  | UTM (NAD 83)        | Aspect / Degree / TT | LiDDI / BA (m <sup>2</sup> /ha) / DBH V (cm) |
|-------------------------------|---------------------|----------------------|----------------------------------------------|
| 009 / TC7 / 08-20-2014 / 1600 | 10T 0559151 4910649 | 40° / 14° / 10m W    | 4.0 / 69 / 269                               |

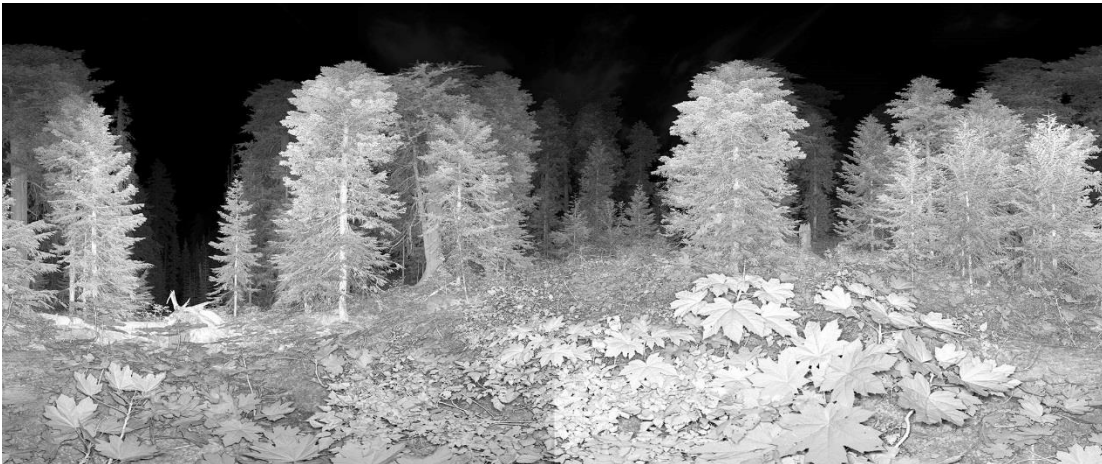

| Scan #/ Plot # / Date / Time  | UTM (NAD 83)        | Aspect / Degree / TT | LiDDI / BA (m <sup>2</sup> /ha) / DBH V (cm) |
|-------------------------------|---------------------|----------------------|----------------------------------------------|
| 010 / TC5 / 08-20-2014 / 1645 | 10T 0559239 4910754 | 60° / 12° / 6m E     | 2.8 / 22 / 247                               |

| Name             | EcoRegion     | Ecological Systems Description                                      |
|------------------|---------------|---------------------------------------------------------------------|
| Three Creek (TC) | West Cascades | North Pacific Maritime Dry-Mesic Douglas-fir-Western Hemlock Forest |

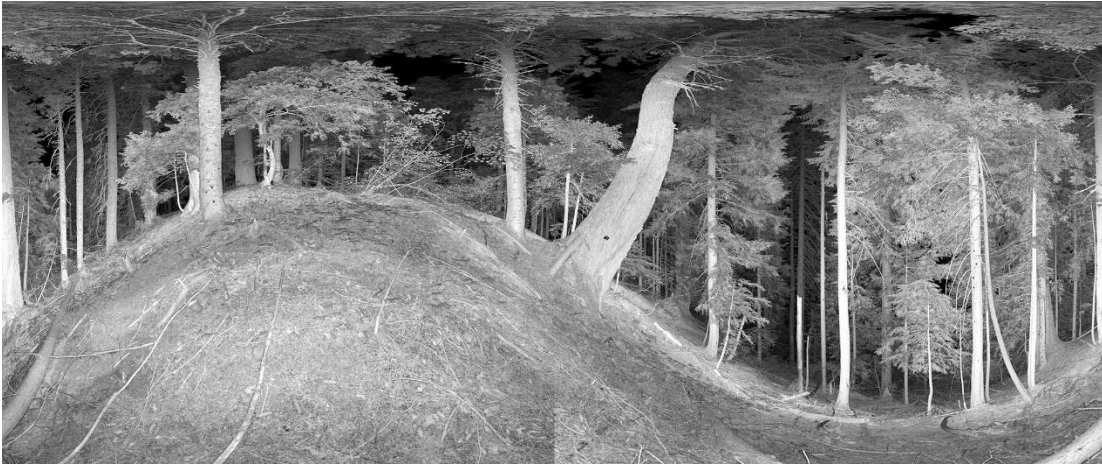

| Scan #/ Plot # / Date / Time  | UTM (NAD 83)        | Aspect / Degree / TT | LiDDI / BA (m <sup>2</sup> /ha) / DBH V (cm) |
|-------------------------------|---------------------|----------------------|----------------------------------------------|
| 011 / TC8 / 08-20-2014 / 1730 | 10T 0559235 4910612 | 118° / 34° / 4m N    | 6.0 / 207 / 574                              |

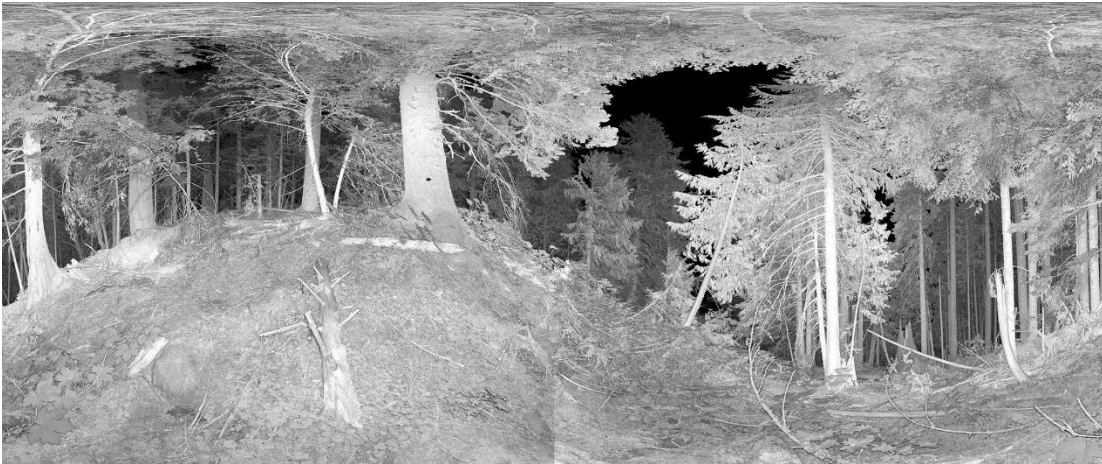

| Scan #/ Plot # / Date / Time  | UTM (NAD 83)        | Aspect / Degree / TT | LiDDI / BA (m <sup>2</sup> /ha) / DBH V (cm) |
|-------------------------------|---------------------|----------------------|----------------------------------------------|
| 012 / TC9 / 08-20-2014 / 1800 | 10T 0559340 4910670 | 92° / 20° / 7m W     | 6.0 / 146 / 415                              |

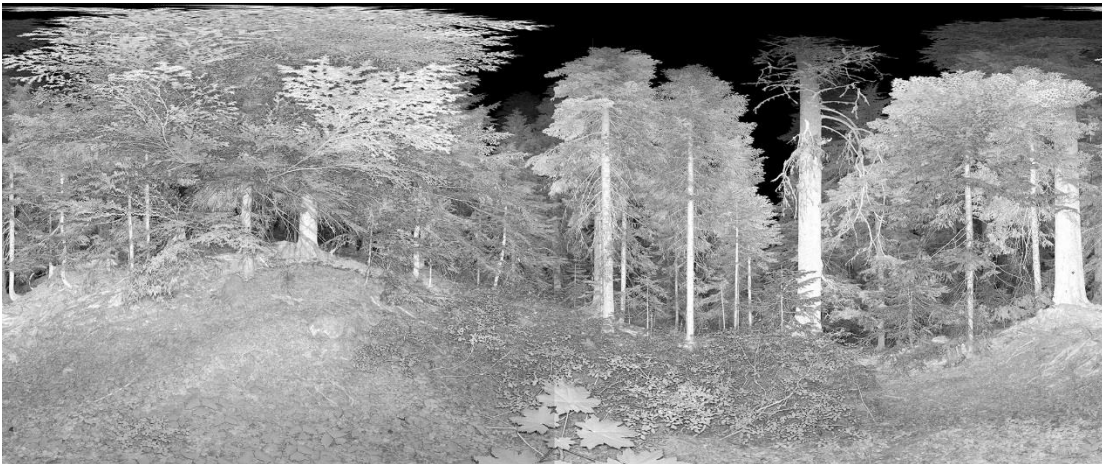

| Scan #/ Plot # / Date / Time  | UTM (NAD 83)        | Aspect / Degree / TT | LiDDI / BA (m <sup>2</sup> /ha) / DBH V (cm) |
|-------------------------------|---------------------|----------------------|----------------------------------------------|
| 013 / TC6 / 08-20-2014 / 1840 | 10T 0559323 4910769 | 40° / 18° / 6m SE    | 5.2 / 76 / 339                               |

| Name              | EcoRegion     | Ecological Systems Description                 |
|-------------------|---------------|------------------------------------------------|
| Wechee Butte (WB) | East Cascades | Rocky Mountain Poor-Site Lodgepole Pine Forest |

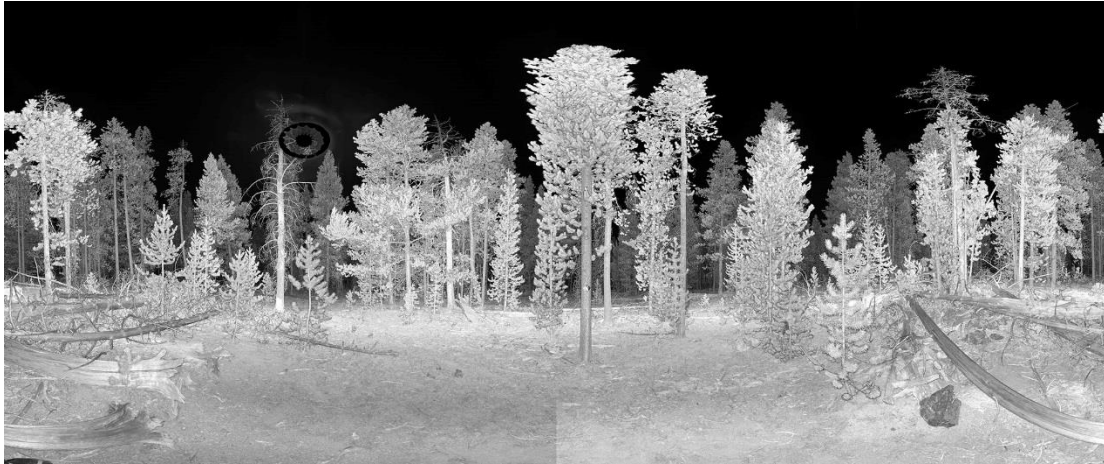

| Scan #/ Plot # / Date / Time  | UTM (NAD 83)        | Aspect / Degree / TT | LiDDI / BA (m <sup>2</sup> /ha) / DBH V (cm) |
|-------------------------------|---------------------|----------------------|----------------------------------------------|
| 000 / WB1 / 09-11-2014 / 1440 | 10T 0644854 4853168 | - / - / 3m 290°      | 1.8 / 23 / 15                                |

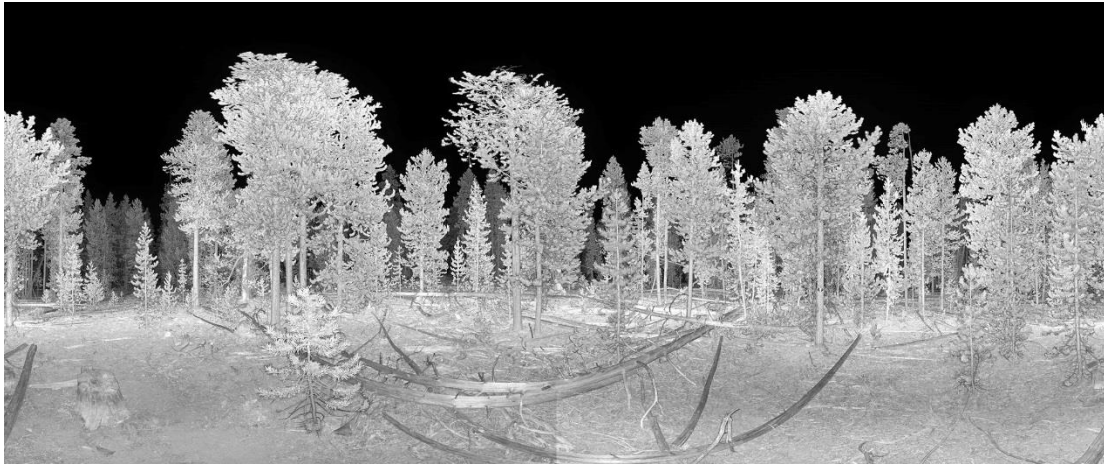

| Scan #/ Plot # / Date / Time  | UTM (NAD 83)        | Aspect / Degree / TT | LiDDI / BA (m <sup>2</sup> /ha) / DBH V (cm) |
|-------------------------------|---------------------|----------------------|----------------------------------------------|
| 001 / WB4 / 09-11-2014 / 1505 | 10T 0644880 4853077 | - / - / 4m 220°      | 1.4 / 11 / 12                                |

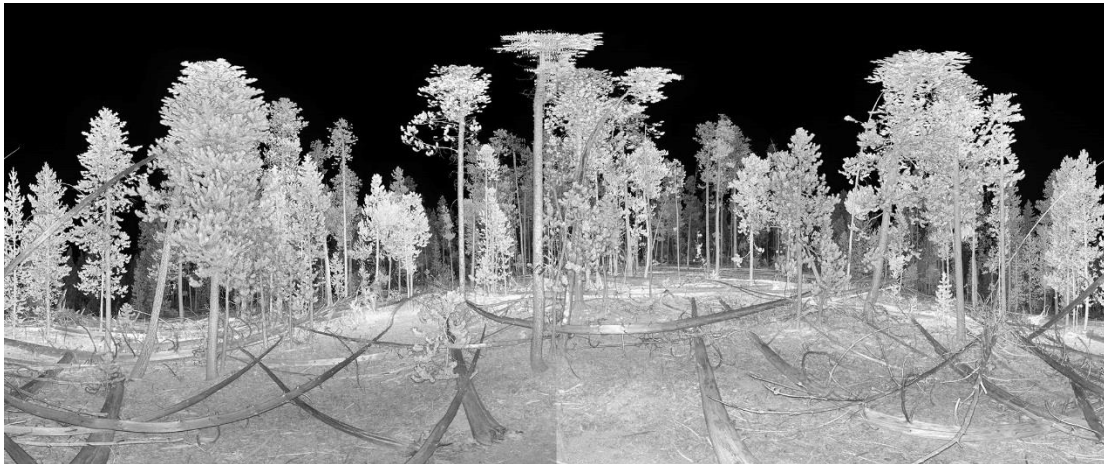

| Scan #/ Plot # / Date / Time  | UTM (NAD 83)        | Aspect / Degree / TT | LiDDI / BA (m <sup>2</sup> /ha) / DBH V (cm) |
|-------------------------------|---------------------|----------------------|----------------------------------------------|
| 002 / WB7 / 09-11-2014 / 1535 | 10T 0644912 4852980 | 315° / 8° / 2m 110°  | 1.4 / 20 / 6                                 |

| Name              | EcoRegion     | Ecological Systems Description                 |
|-------------------|---------------|------------------------------------------------|
| Wechee Butte (WB) | East Cascades | Rocky Mountain Poor-Site Lodgepole Pine Forest |

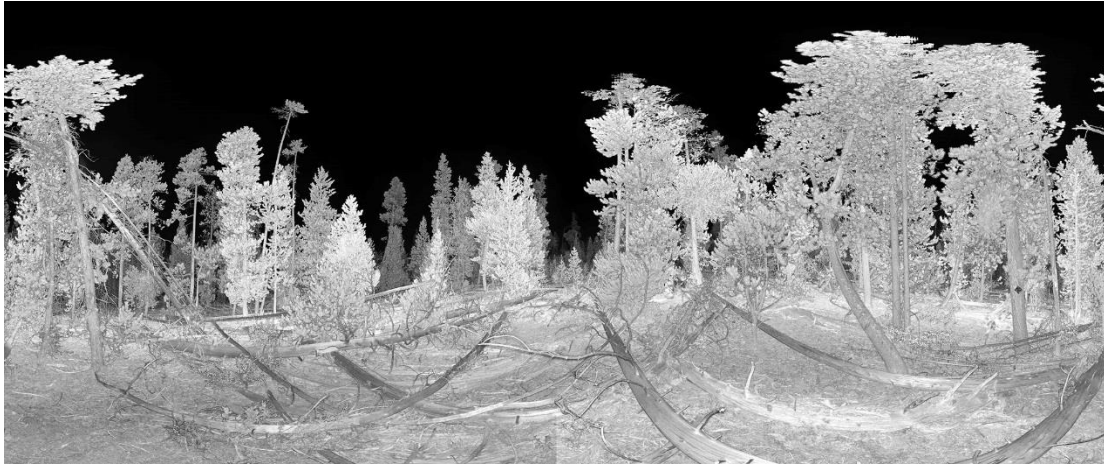

| Scan #/ Plot # / Date / Time  | UTM (NAD 83)        | Aspect / Degree / TT | LiDDI / BA (m <sup>2</sup> /ha) / DBH V (cm) |
|-------------------------------|---------------------|----------------------|----------------------------------------------|
| 003 / WB8 / 09-11-2014 / 1600 | 10T 0645007 4853003 | 280° / 11° / 3m 200° | 1.4 / 13 / 8                                 |

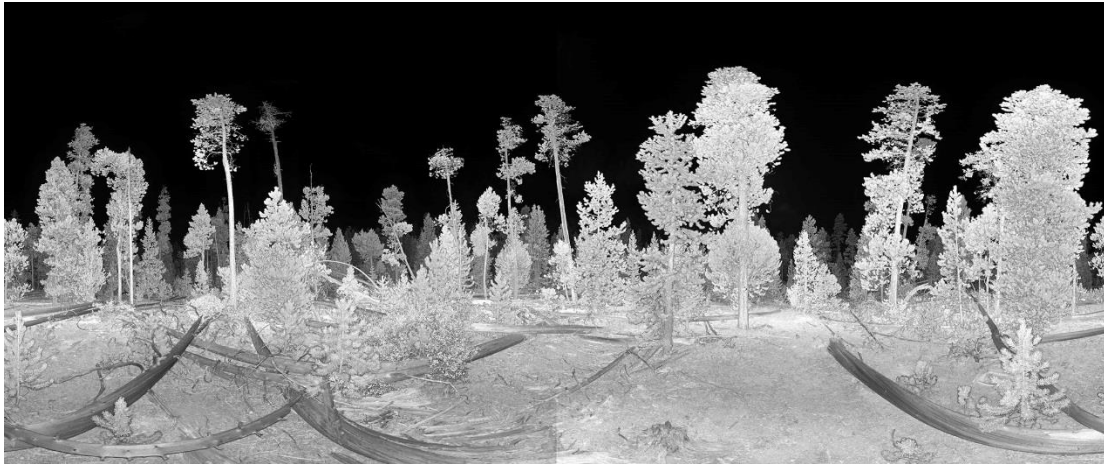

| Scan #/ Plot # / Date / Time  | UTM (NAD 83)        | Aspect / Degree / TT | LiDDI / BA (m <sup>2</sup> /ha) / DBH V (cm) |
|-------------------------------|---------------------|----------------------|----------------------------------------------|
| 004 / WB9 / 09-11-2014 / 1625 | 10T 0645109 5853037 | - / - / 5m 245°      | 1.4 / 9 / 5                                  |

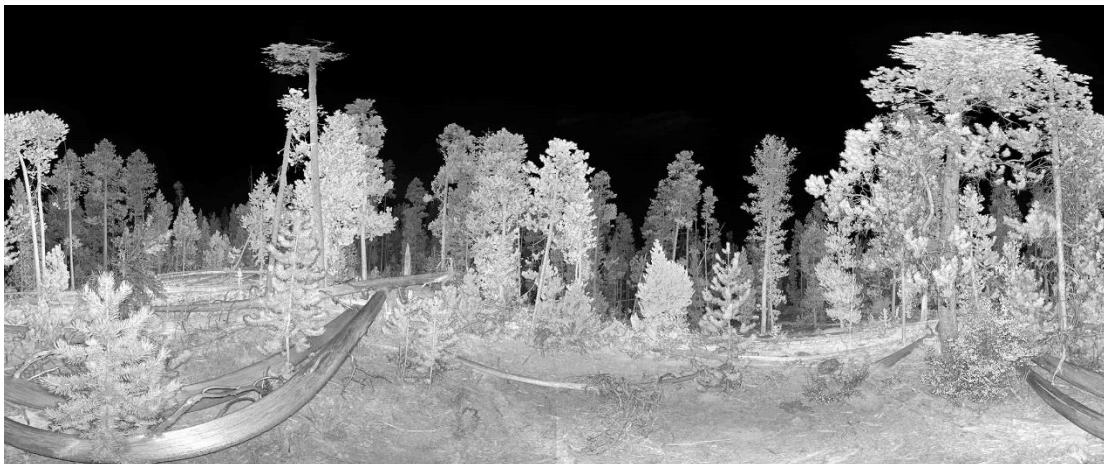

| Scan #/ Plot # / Date / Time  | UTM (NAD 83)        | Aspect / Degree / TT | LiDDI / BA (m <sup>2</sup> /ha) / DBH V (cm) |
|-------------------------------|---------------------|----------------------|----------------------------------------------|
| 005 / WB6 / 09-11-2014 / 1650 | 10T 0645076 4853131 | 340° / 13° / 3m 60°  | 1.8 / 16 / 20                                |

| Name              | EcoRegion     | Ecological Systems Description                 |
|-------------------|---------------|------------------------------------------------|
| Wechee Butte (WB) | East Cascades | Rocky Mountain Poor-Site Lodgepole Pine Forest |

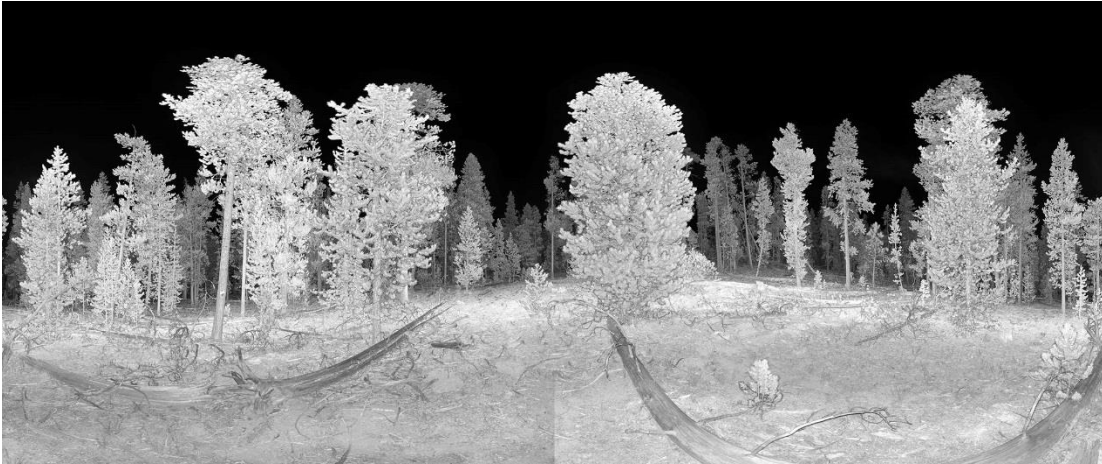

| Scan #/ Plot # / Date / Time  | UTM (NAD 83)        | Aspect / Degree / TT | LiDDI / BA (m <sup>2</sup> /ha) / DBH V (cm) |
|-------------------------------|---------------------|----------------------|----------------------------------------------|
| 006 / WB5 / 09-11-2014 / 1720 | 10T 0644978 4853093 | 300° / 6° / 4m 320°  | 1.4 / 14 / 8                                 |

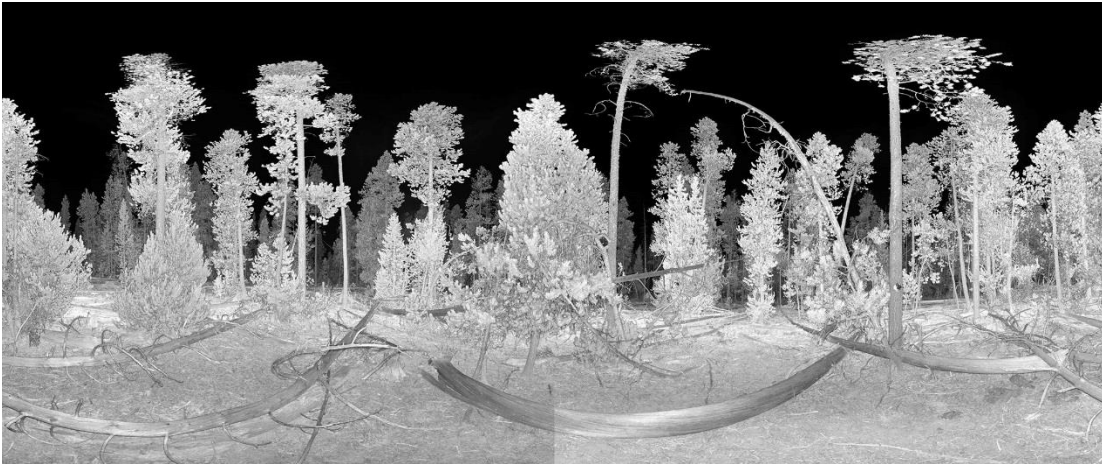

| Scan #/ Plot # / Date / Time  | UTM (NAD 83)        | Aspect / Degree / TT | LiDDI / BA (m <sup>2</sup> /ha) / DBH V (cm) |
|-------------------------------|---------------------|----------------------|----------------------------------------------|
| 007 / WB3 / 09-11-2014 / 1745 | 10T 0645049 4853232 | 360° / 2° / 3m 60°   | 1.4 / 11 / 8                                 |

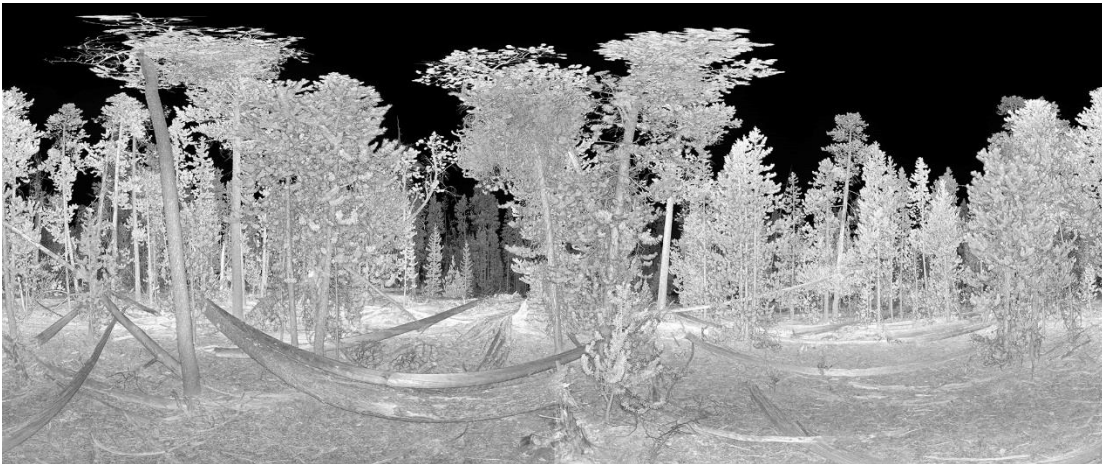

| Scan #/ Plot # / Date / Time  | UTM (NAD 83)        | Aspect / Degree / TT | LiDDI / BA (m <sup>2</sup> /ha) / DBH V (cm) |
|-------------------------------|---------------------|----------------------|----------------------------------------------|
| 008 / WB2 / 09-11-2014 / 1810 | 10T 0644943 4853205 | - / - / 3m 225°      | 1.4 / 15 / 16                                |

## supplement B—Lidar plot signatures

The depth and openness signatures for all 27 sites. Depth (meters) or openness (percent open) is on the y axis with the x axis representing the angle of the scan line. The left side being the ground level with the returns increasing in angular increments, approaching the right side (vertical).

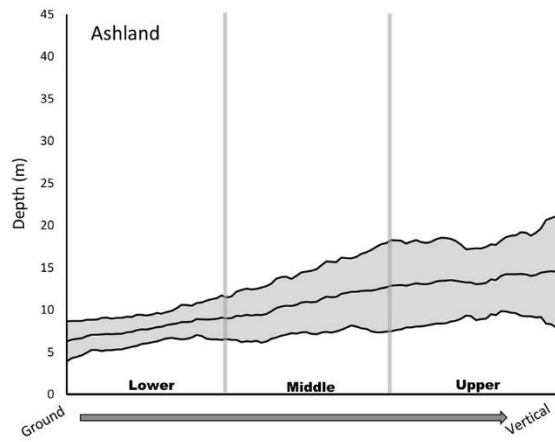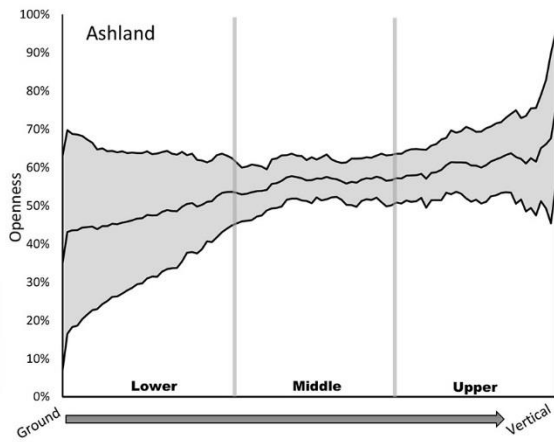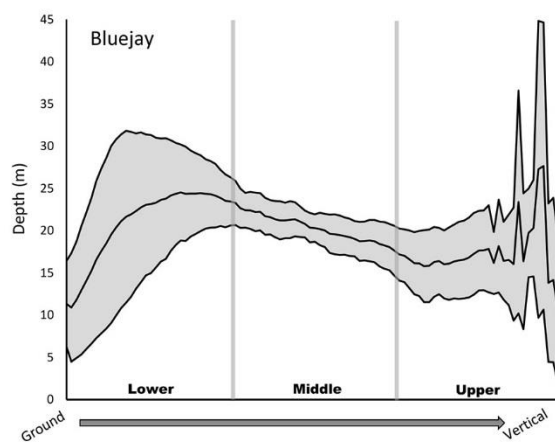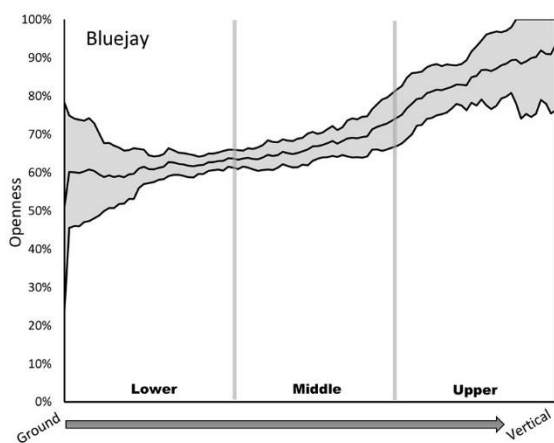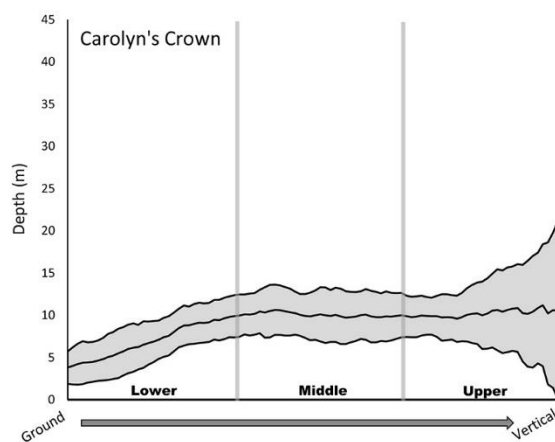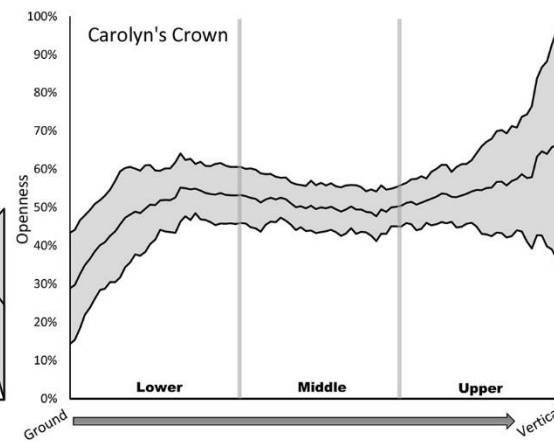

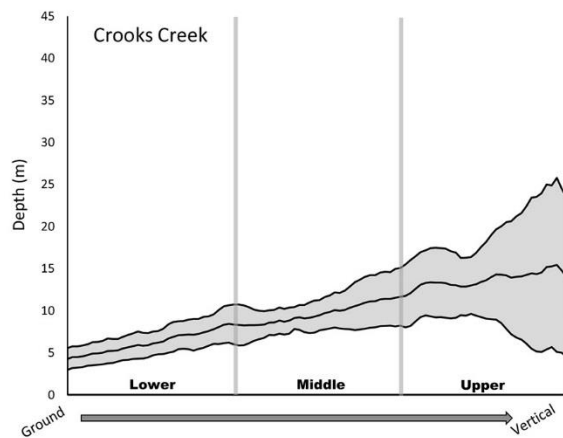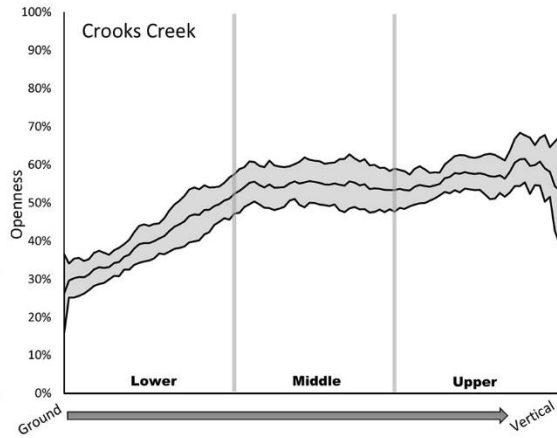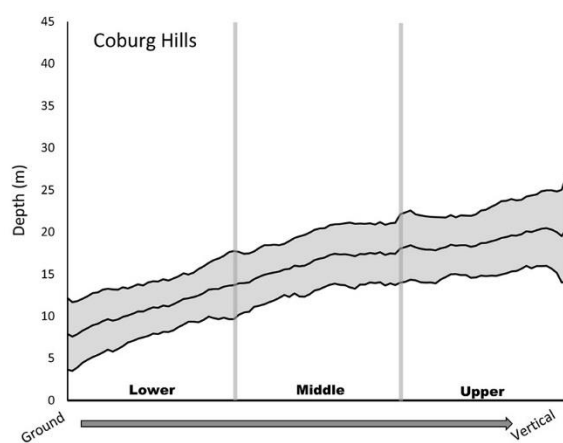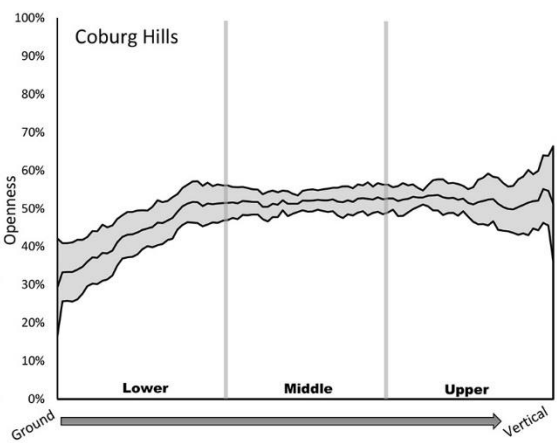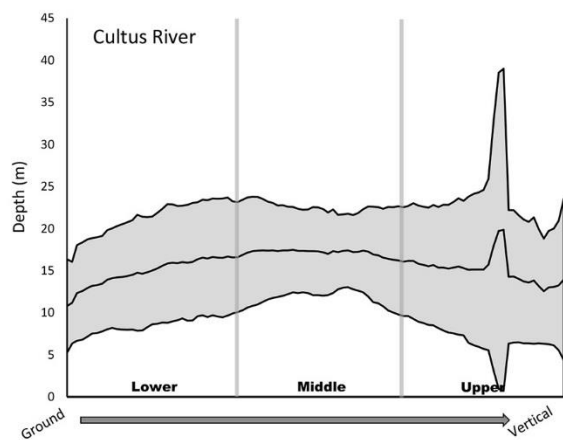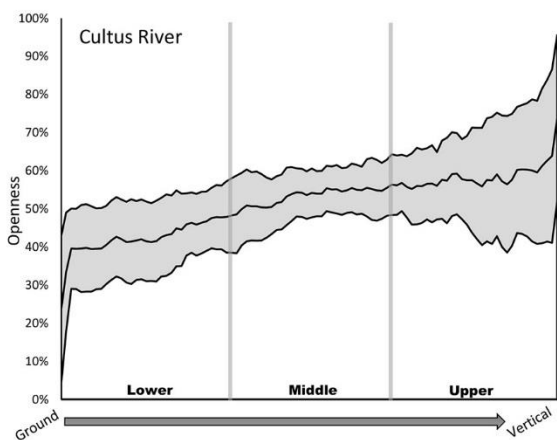

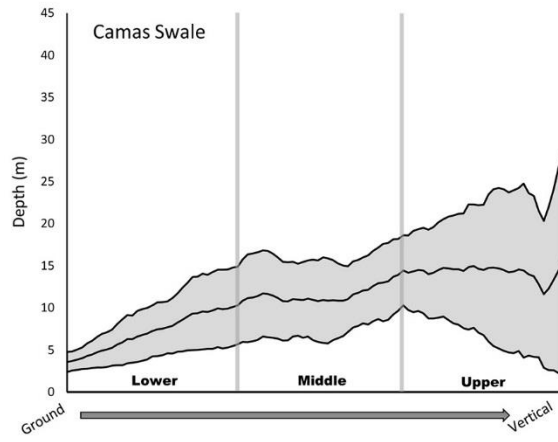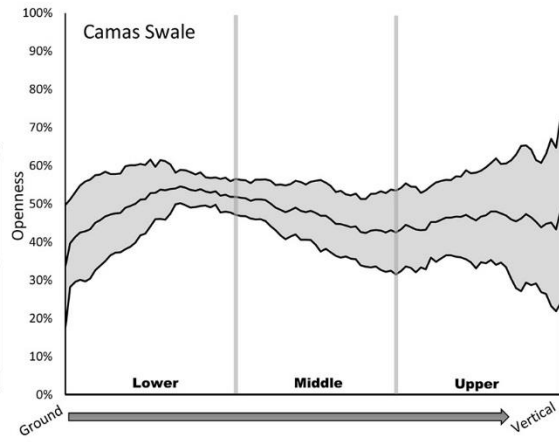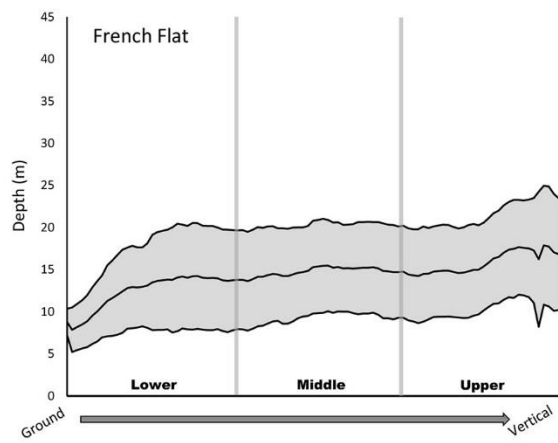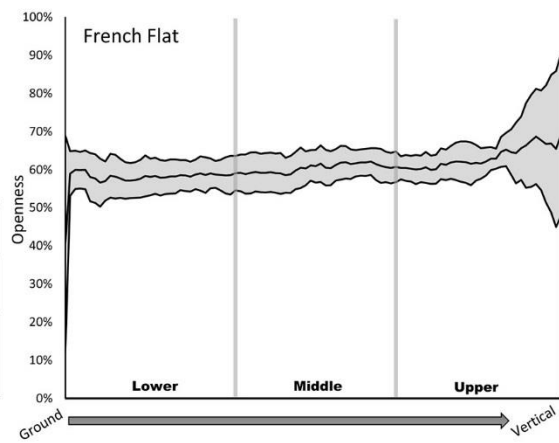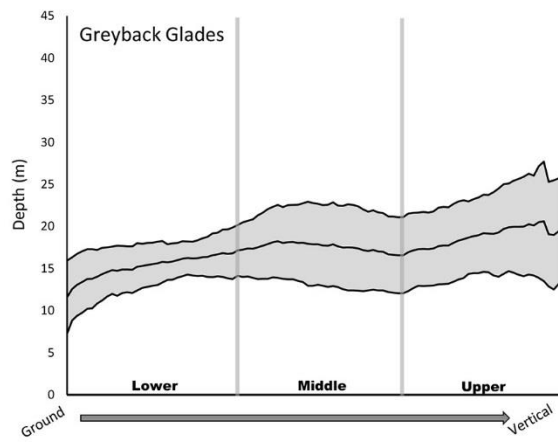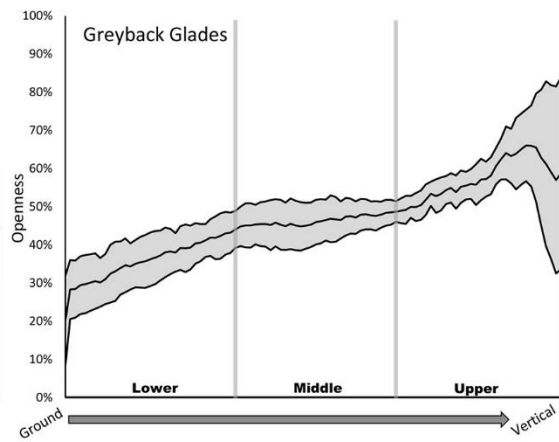

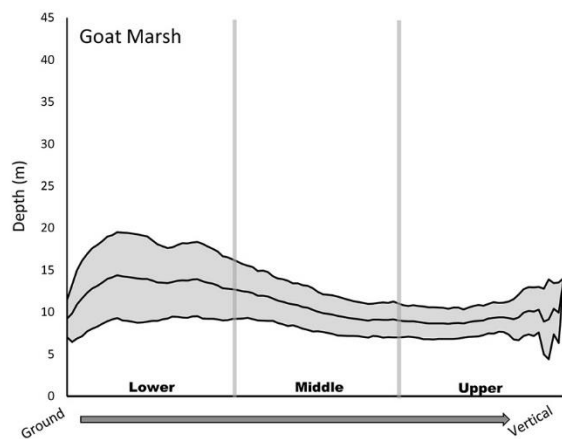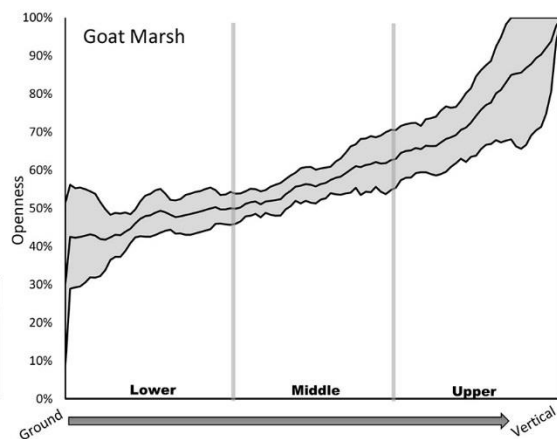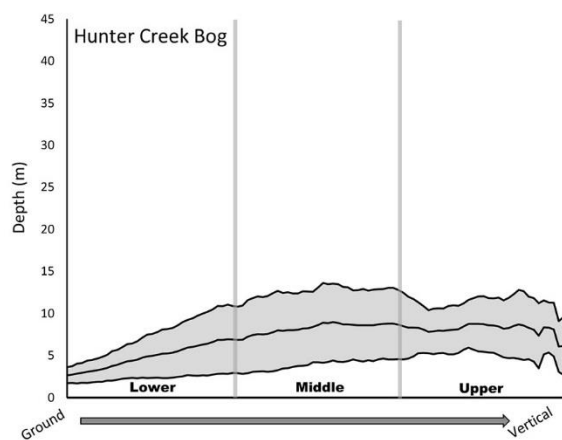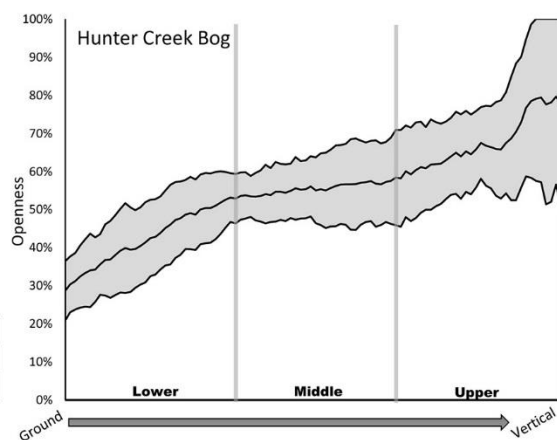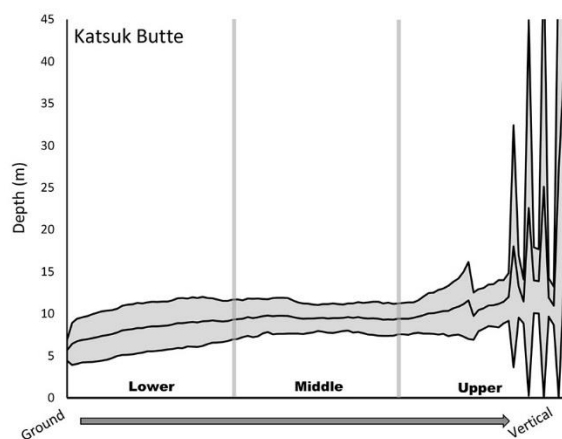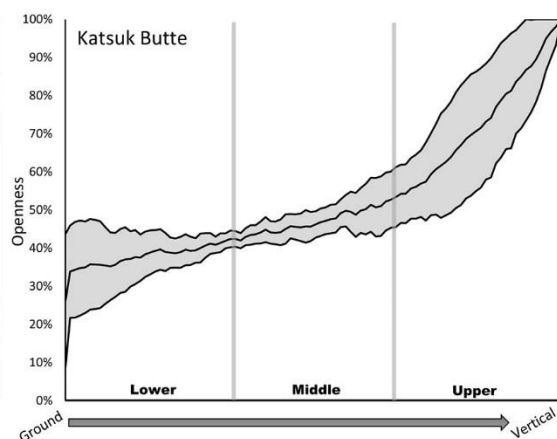

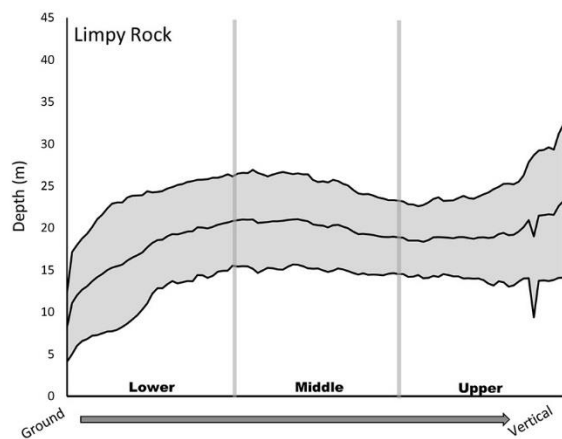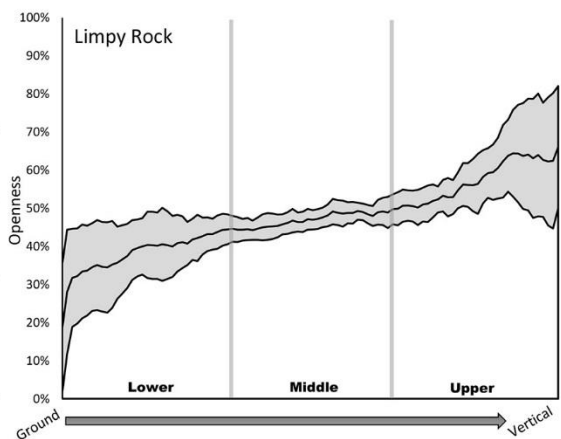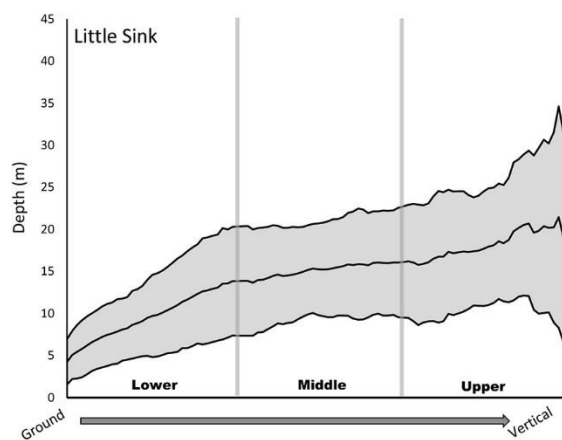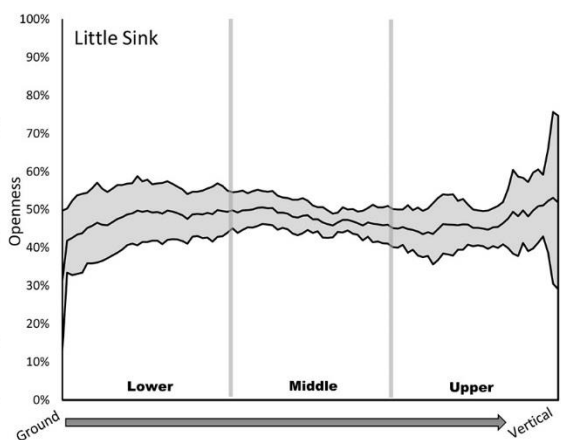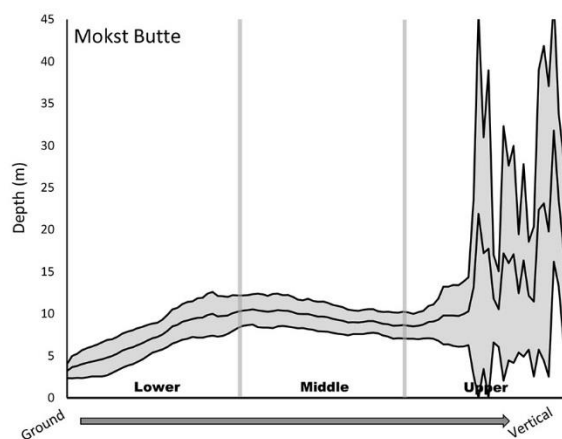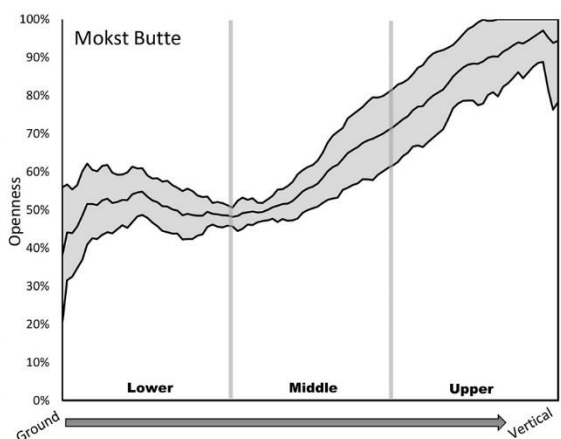

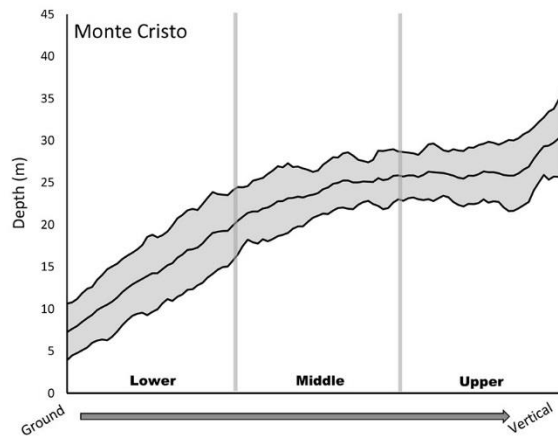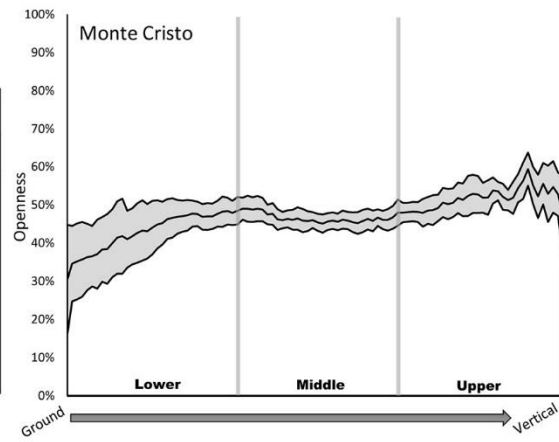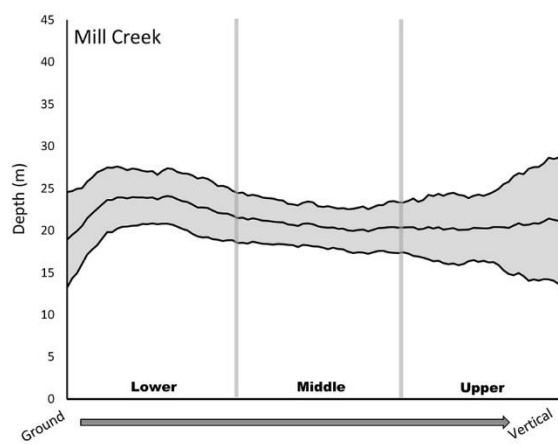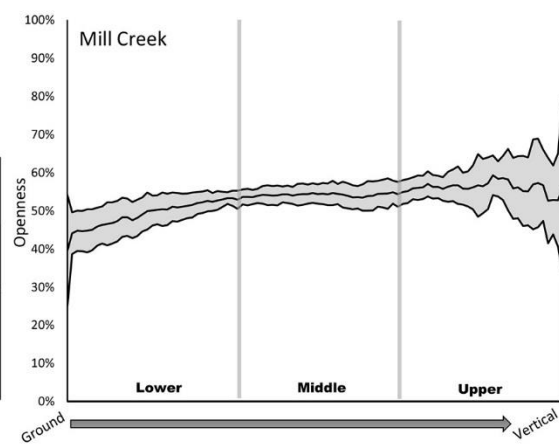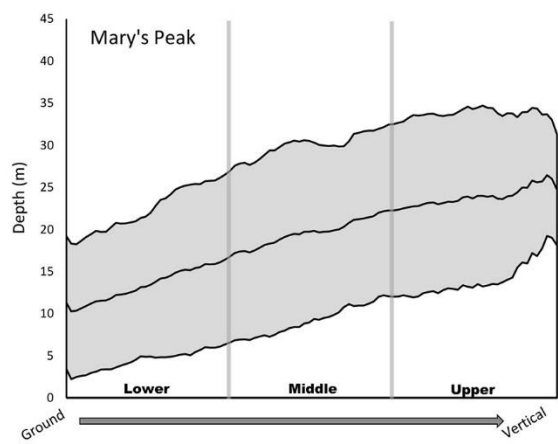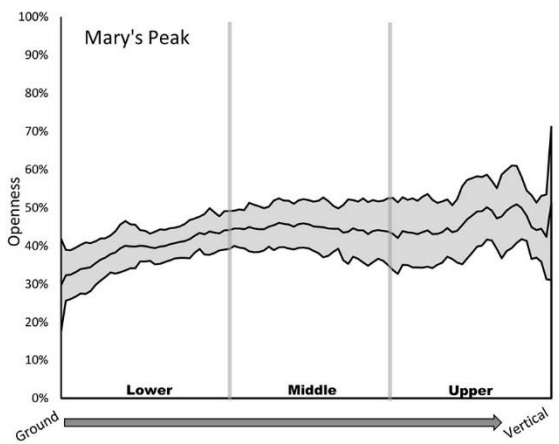

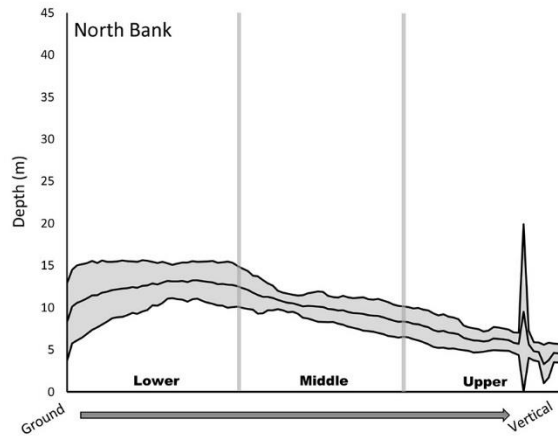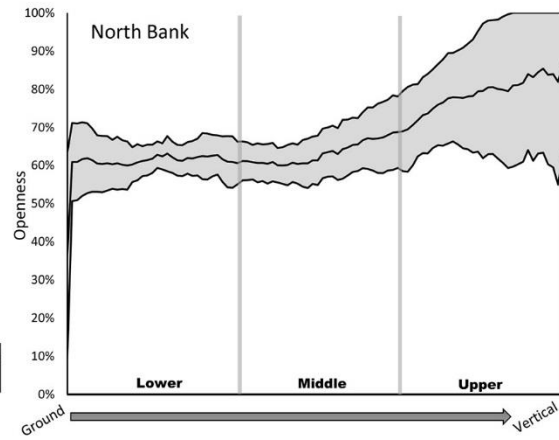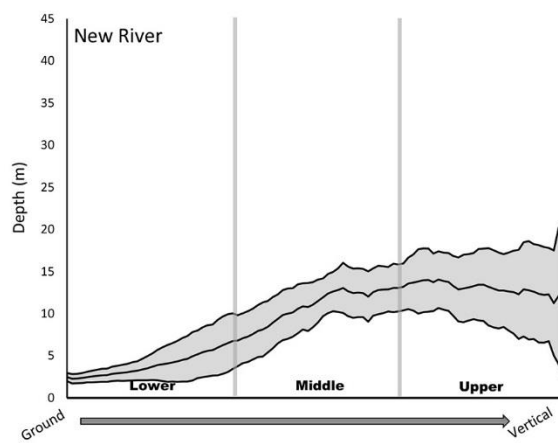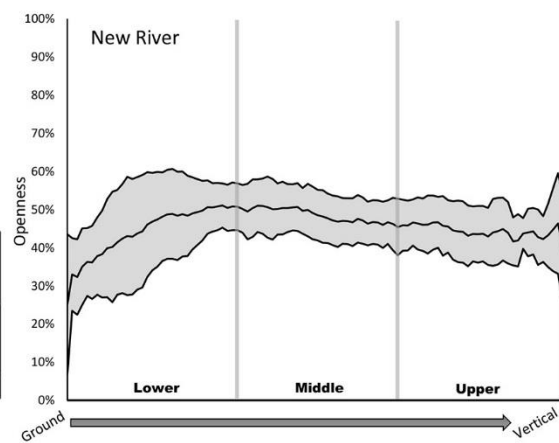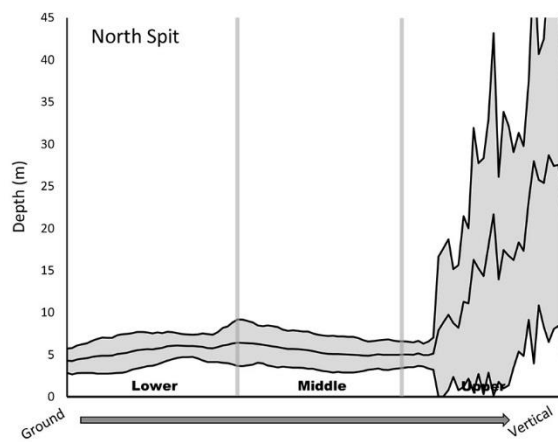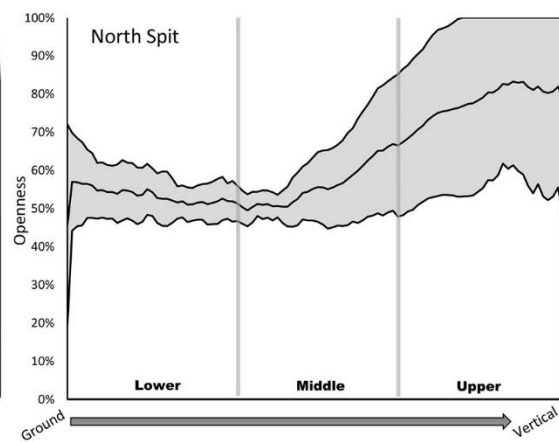

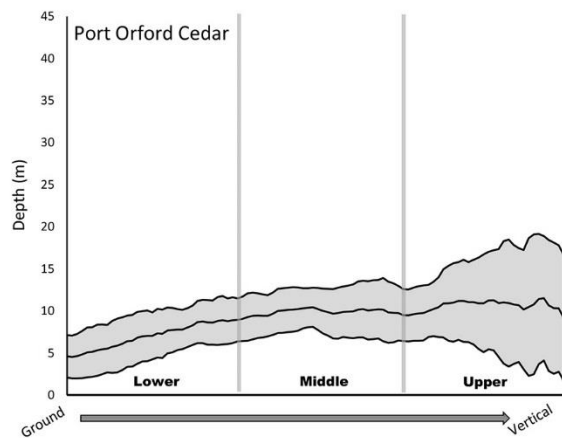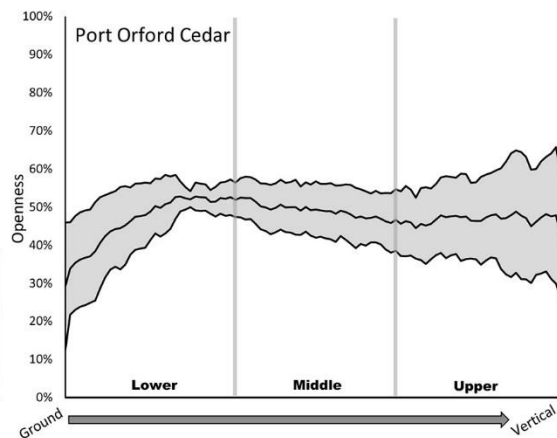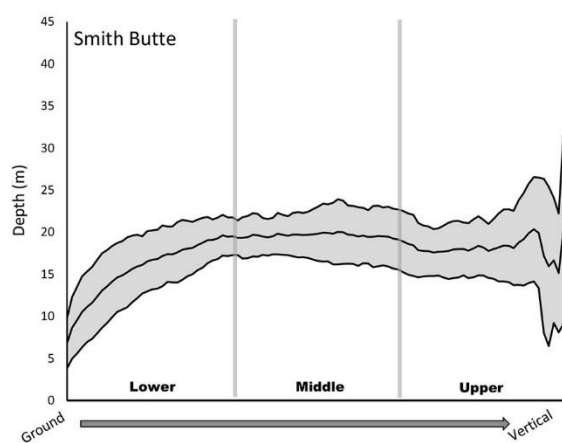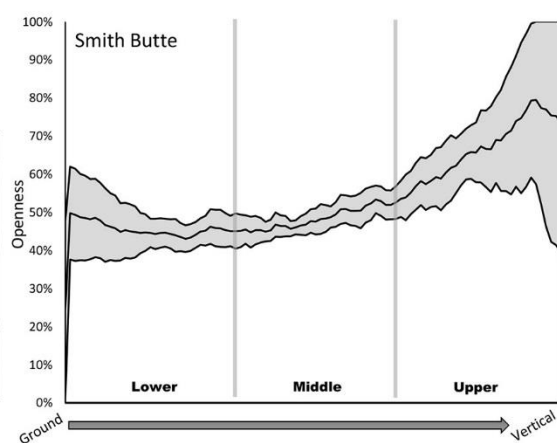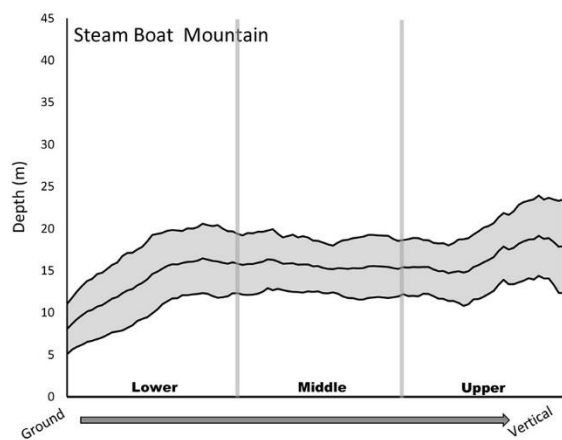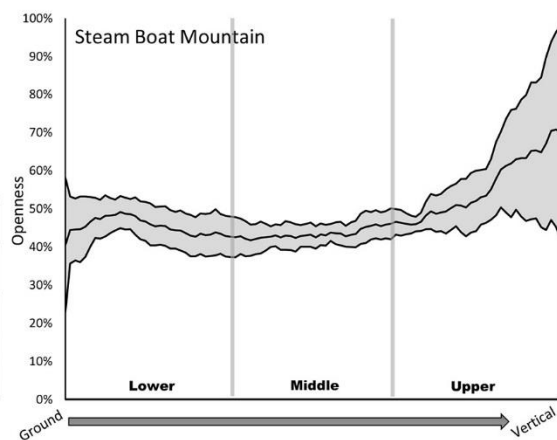

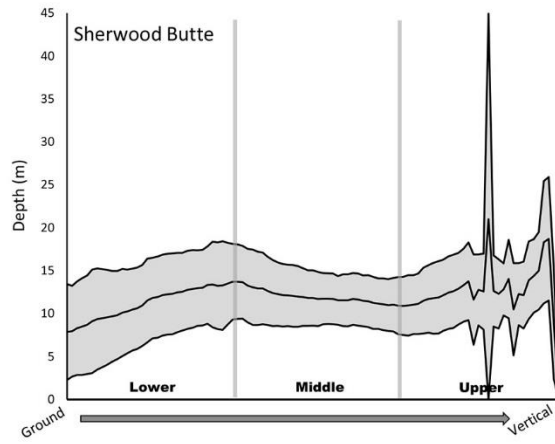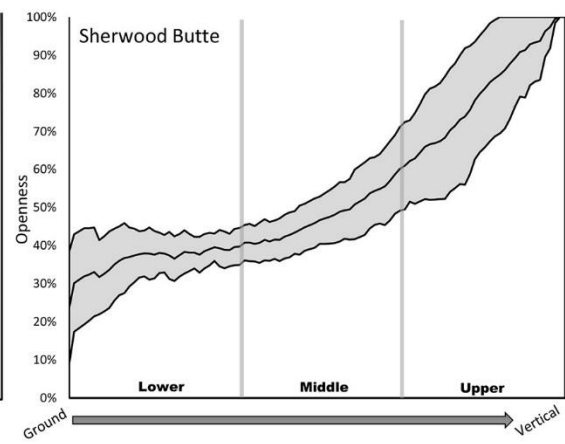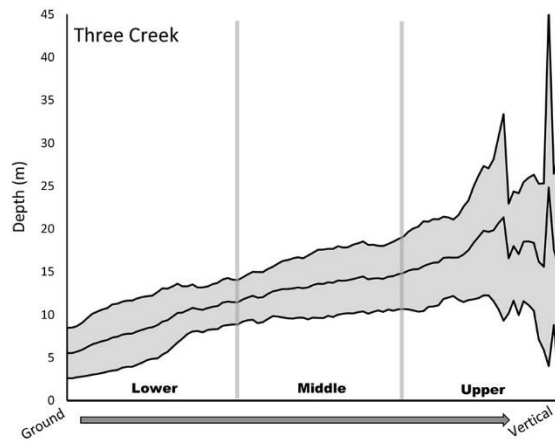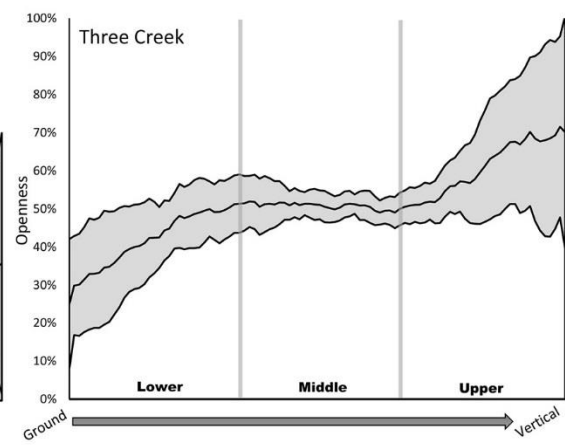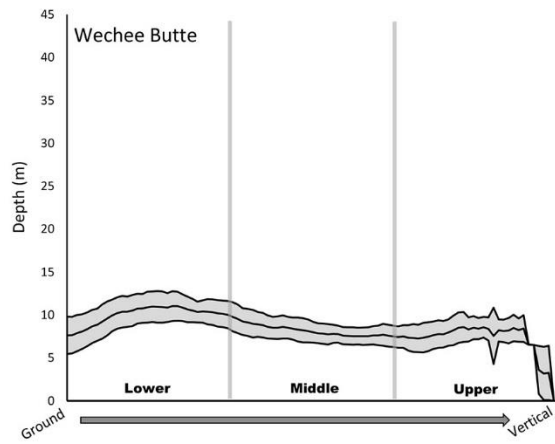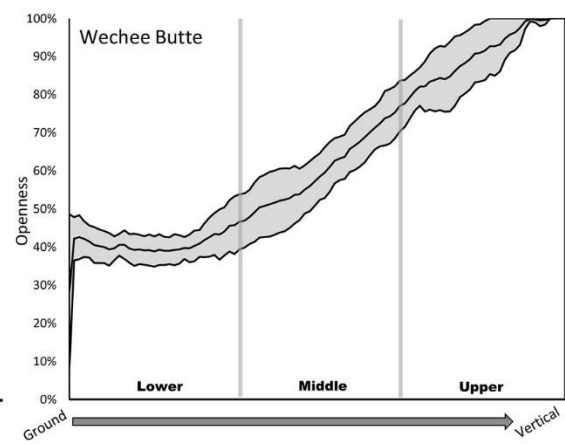

Supplement: s1 [file s1]
